# Supplementary material for: Pathway-Wide Genetic Risks in Chlamydial Infections Overlap between Tissue Tropisms: A Genome-Wide Association Scan
Source: Mediators Inflamm. 2018 Jun 3;2018:3434101. doi: 10.1155/2018/3434101 (PMC6008910; doi:10.1155/2018/3434101)
Supplement: Supplementary 1 — Results of pathway enrichment analysis using Database for Annotation, Visualization and Integrated Discovery (DAVID). [file 3434101.f1.xlsx]

## Sheet: REACTOME
Category	Term	Count	%	PValue	Genes	List Total	Pop Hits	Pop Total	Fold Enrichment	Bonferroni	Benjamini	FDR
REACTOME_PATHWAY	REACT_14797:Signaling by GPCR	563	23.3416	1.63544e-110	390445, 120787, 59345, 6870, 155, 154, 391194, 59340, 6352, 153, 5368, 391196, 150, 6869, 151, 391195, 79501, 6866, 6865, 390036, 390037, 390038, 2852, 222545, 552891, 120776, 120775, 390433, 390431, 391191, 390437, 391192, 390436, 391190, 6364, 6363, 6366, 2846, 1812, 1813, 120065, 1814, 120066, 1816, 2840, 6360, 6752, 390321, 6753, 729759, 6750, 6751, 282770, 282775, 23538, 390538, 728, 6376, 1…	1739	631	3398	1.74342	1.06304e-108	1.06304e-108	1.66684e-107
REACTOME_PATHWAY	REACT_152:Cell Cycle, Mitotic	299	12.3964	4.99633e-83	8881, 55746, 440917, 8317, 332, 9861, 8318, 23279, 79902, 64682, 64689, 10714, 23649, 55755, 1325, 1719, 23122, 10726, 55920, 8243, 84296, 1453, 9985, 1454, 22919, 55722, 6500, 348235, 81565, 25909, 1069, 5347, 10733, 10735, 10213, 1062, 1060, 9183, 7321, 55388, 1058, 7324, 9184, 203068, 728642, 147841, 7846, 8636, 984, 729012, 983, 10382, 9491, 10383, 378708, 9493, 6396, 701, 51529, 55125, 5116,…	1739	304	3398	1.92186	3.24761e-81	1.62381e-81	5.09225e-80
REACTOME_PATHWAY	REACT_11061:Signalling by NGF	171	7.08955	3.15472e-43	4208, 10818, 4303, 805, 6774, 4205, 440917, 2002, 801, 156, 4615, 6868, 8878, 253260, 57761, 9252, 673, 6610, 3710, 55851, 5170, 4193, 3551, 1385, 207, 208, 22986, 161, 64223, 10000, 4893, 160, 84335, 728590, 84894, 6016, 6014, 4790, 4792, 1432, 27018, 6300, 5970, 3845, 5045, 53358, 5046, 51107, 7189, 23421, 83464, 109, 4803, 108, 107, 4099, 4804, 1849, 5137, 10018, 1848, 1845, 1846, 5153, 57142,…	1739	176	3398	1.89849	2.05057e-41	6.83523e-42	3.21529e-40
REACTOME_PATHWAY	REACT_1538:Cell Cycle Checkpoints	109	4.51907	2.6861e-27	8881, 8317, 9861, 8318, 10926, 64682, 4193, 545, 728590, 472, 51434, 51433, 84126, 84515, 5699, 5698, 4173, 23594, 8379, 4172, 4175, 4174, 648152, 4176, 1111, 10213, 4171, 996, 7321, 55388, 995, 7324, 651610, 993, 990, 991, 9184, 5810, 891, 898, 23595, 63967, 5682, 5686, 5685, 5684, 983, 5683, 10393, 9491, 5984, 5985, 6117, 6119, 701, 6118, 51529, 5708, 5709, 5884, 5706, 5883, 5707, 5691, 5704, 5…	1739	112	3398	1.90166	1.74596e-25	4.36491e-26	2.73766e-24
REACTOME_PATHWAY	REACT_11044:Signaling by Rho GTPases	117	4.85075	1.43796e-26	84144, 29127, 55843, 9459, 9754, 25791, 89941, 1894, 57569, 90627, 8874, 7409, 9912, 29, 89846, 2, 23263, 7410, 7074, 29984, 10144, 7204, 80728, 9908, 51291, 79822, 1124, 9886, 1123, 553158, 9901, 55114, 10276, 51306, 171177, 23092, 64333, 116984, 64411, 391, 393, 392, 395, 394, 116985, 10928, 343578, 94134, 23526, 9181, 23433, 396, 613, 397, 398, 399, 83478, 121512, 998, 4952, 93663, 23380, 9161…	1739	123	3398	1.85868	9.34671e-25	1.86934e-25	1.46556e-23
REACTOME_PATHWAY	REACT_383:DNA Replication	94	3.89718	5.33112e-23	1763, 5682, 8317, 9861, 8318, 5686, 5685, 5684, 5683, 9491, 10926, 5984, 5985, 6117, 6119, 10714, 6118, 81620, 5708, 23649, 5709, 5706, 5707, 5691, 5704, 5981, 5690, 5705, 5693, 5702, 5983, 5925, 5692, 5982, 51053, 5700, 5695, 5701, 5694, 5696, 7311, 5687, 5688, 5689, 728590, 5717, 652826, 5718, 5719, 84296, 5557, 5558, 5710, 5711, 51659, 1026, 5713, 5714, 5715, 57804, 5716, 8900, 51343, 5422, 51…	1739	97	3398	1.89356	3.46523e-21	5.77538e-22	5.43347e-20
REACTOME_PATHWAY	REACT_15295:Opioid Signalling	78	3.23383	1.67919e-19	5330, 114, 115, 23236, 805, 112, 113, 5331, 5332, 5577, 111, 801, 59345, 156, 5533, 5534, 94235, 5136, 5443, 5173, 5321, 552891, 3710, 1385, 196883, 548645, 51764, 5499, 5142, 5143, 5141, 3708, 5144, 3709, 2769, 2788, 2787, 2767, 2784, 2783, 2786, 2785, 2770, 2790, 2791, 2771, 2792, 2793, 4988, 5516, 109, 5515, 108, 5518, 54331, 107, 55970, 5519, 5137, 84152, 9630, 5153, 814, 5566, 5567, 2776, 10…	1739	80	3398	1.90515	1.09148e-17	1.55925e-18	1.71143e-16
REACTOME_PATHWAY	REACT_13552:Integrin cell surface interactions	77	3.19237	2.60569e-17	83700, 54518, 682, 284217, 3384, 7450, 3385, 2335, 3680, 3386, 3683, 3684, 3381, 3681, 3383, 3682, 7448, 3676, 3675, 3674, 3679, 2244, 3678, 1287, 22801, 50848, 2200, 1280, 5747, 1282, 10235, 1284, 5175, 1285, 1286, 3690, 3691, 3693, 3694, 3695, 7412, 3685, 3688, 3687, 6696, 2885, 3689, 3915, 1277, 1278, 3912, 58494, 6654, 8515, 8516, 2266, 3908, 3696, 3655, 1445, 10411, 3673, 5906, 6714, 3672, 5…	1739	81	3398	1.8575	1.6937e-15	2.11712e-16	2.65571e-14
REACTOME_PATHWAY	REACT_16888:Signaling by PDGF	62	2.57048	5.47785e-15	1292, 1293, 1290, 1291, 6774, 5781, 1297, 5894, 6772, 80310, 7060, 5327, 1289, 1287, 5159, 1280, 1281, 1282, 5605, 1284, 1285, 5604, 1286, 5921, 2889, 2886, 4893, 2885, 6696, 5595, 6777, 1277, 6776, 1278, 6778, 6654, 5594, 4690, 3265, 56034, 3845, 5045, 8440, 6714, 5154, 7529, 5155, 5156, 1298, 1299, 9564, 5340, 5290, 1398, 5291, 1399, 5335, 7059, 7058, 5295, 5296, 7057	1739	64	3398	1.89293	3.53606e-13	3.93019e-14	5.54001e-12
REACTOME_PATHWAY	REACT_6850:Cdc20:Phospho-APC/C mediated degradation of Cyclin A	63	2.61194	2.42895e-14	8881, 5682, 9861, 5686, 5685, 5684, 5683, 983, 9491, 10393, 64682, 701, 51529, 5708, 5709, 5706, 5707, 5691, 5704, 5690, 5705, 5693, 5702, 5692, 5700, 5695, 5701, 5694, 7311, 5696, 5687, 5688, 5689, 728590, 51434, 51433, 29882, 29945, 4085, 652826, 5717, 5718, 5719, 8697, 729948, 5710, 5711, 5713, 5714, 5715, 5716, 8900, 5699, 5698, 890, 11065, 10213, 5720, 246184, 5721, 6233, 996, 7321, 7324, 99…	1739	66	3398	1.86518	1.5804e-12	1.58096e-13	2.47802e-11
REACTOME_PATHWAY	REACT_1505:Integration of energy metabolism	165	6.8408	9.48701e-14	55437, 5166, 5164, 4698, 5165, 4697, 2642, 2641, 5162, 5163, 5160, 59345, 9551, 374291, 3481, 4519, 4513, 539, 4512, 51422, 4514, 1329, 552891, 4191, 1327, 4508, 4509, 10476, 51764, 4695, 4696, 81617, 4694, 54539, 3420, 1431, 2788, 2787, 2784, 2783, 2786, 27089, 2785, 513, 2790, 2791, 6888, 2271, 5565, 5564, 109, 108, 5563, 3419, 54331, 5562, 107, 9167, 516, 515, 55066, 514, 9377, 92335, 57546, 5…	1739	219	3398	1.47219	6.17006e-12	5.60885e-13	9.67448e-11
REACTOME_PATHWAY	REACT_11045:Signaling by Wnt	58	2.40464	5.46515e-13	5682, 9861, 5686, 5685, 5684, 5683, 9491, 5708, 5709, 5706, 5707, 5691, 5704, 5705, 5690, 5702, 5693, 5692, 5695, 5700, 5701, 5694, 7311, 5696, 5687, 5688, 5689, 8454, 8312, 728590, 652826, 5717, 5718, 5719, 1452, 2932, 8945, 5710, 5711, 5713, 5714, 5715, 5716, 6500, 1499, 5516, 5515, 5518, 5519, 5699, 5698, 324, 10213, 5720, 5721, 6233, 5525, 5528, 5527, 5526	1739	61	3398	1.8579	3.55266e-11	2.96052e-12	5.57054e-10
REACTOME_PATHWAY	REACT_9035:APC/C:Cdh1-mediated degradation of Skp2	58	2.40464	5.46515e-13	8881, 5682, 9861, 5686, 5685, 5684, 5683, 9491, 10393, 64682, 51529, 5708, 5709, 5706, 5707, 5691, 5704, 5705, 5690, 5693, 5702, 5692, 5700, 5695, 5701, 6502, 5694, 7311, 5696, 5687, 5688, 5689, 728590, 51434, 51433, 29882, 29945, 652826, 5717, 5718, 5719, 8697, 729948, 5710, 5711, 5713, 5714, 5715, 5716, 51343, 5699, 5698, 11065, 10213, 5720, 246184, 5721, 6233, 996, 7321, 7324	1739	61	3398	1.8579	3.55266e-11	2.96052e-12	5.57054e-10
REACTOME_PATHWAY	REACT_7970:Telomere Maintenance	53	2.19735	1.18887e-11	128312, 1763, 3013, 8360, 3012, 5984, 8362, 5985, 8361, 8364, 6117, 8363, 65057, 8366, 10714, 6119, 8365, 6118, 8368, 8970, 8367, 8349, 23649, 5981, 5983, 5982, 723790, 8294, 8359, 8290, 8338, 8339, 5557, 5558, 57804, 8340, 121504, 8346, 5422, 8345, 8348, 8347, 5111, 554313, 8342, 8341, 8344, 8343, 5427, 7014, 7015, 5424, 7013, 5425, 5426, 3018, 8370, 1736, 26277, 3014, 3015, 3017, 54386, 2237, 3…	1739	56	3398	1.84932	7.72766e-10	5.94436e-11	1.21169e-08
REACTOME_PATHWAY	REACT_498:Signaling by Insulin receptor	39	1.61692	1.39551e-10	5140, 3265, 5894, 6464, 7249, 3845, 2475, 3481, 1975, 117145, 1977, 1978, 723961, 3630, 57761, 7529, 6009, 5605, 5604, 5170, 8660, 57521, 1796, 208, 5290, 5291, 29904, 6198, 64223, 1981, 4893, 7248, 2885, 5595, 3667, 3643, 5295, 6194, 5296, 6654, 5594	1739	39	3398	1.954	9.07078e-09	6.47913e-10	1.4223e-07
REACTOME_PATHWAY	REACT_13635:Regulation of activated PAK-2p34 by proteasome mediated degradation	41	1.69983	1.61879e-08	5717, 652826, 5718, 5719, 5682, 5710, 5711, 9861, 5686, 5713, 5685, 5714, 5684, 5715, 5716, 5683, 9491, 5699, 5708, 5709, 5706, 5707, 5691, 5704, 10213, 5690, 5705, 5720, 5702, 5693, 5692, 5721, 5695, 5700, 5701, 5694, 6233, 5696, 7311, 5687, 5688, 5689, 728590	1739	44	3398	1.82077	1.05221e-06	7.01476e-08	1.64987e-05
REACTOME_PATHWAY	REACT_9417:Signaling by EGFR	43	1.78275	2.36418e-08	3265, 5781, 5894, 1956, 6464, 3845, 867, 8038, 1950, 30011, 6868, 58513, 102, 9146, 1445, 6714, 7529, 10253, 5605, 10252, 2060, 5604, 8874, 6456, 10254, 8027, 6233, 7311, 5290, 161, 55824, 4893, 2549, 5335, 2885, 1211, 728590, 160, 5595, 5295, 998, 6654, 29924, 5594	1739	47	3398	1.7877	1.53671e-06	9.60447e-08	2.40956e-05
REACTOME_PATHWAY	REACT_1046:Pyruvate metabolism and TCA cycle	27	1.1194	3.38362e-07	3420, 1743, 682, 1431, 5162, 5160, 283398, 23539, 8050, 9123, 2271, 4967, 6392, 6390, 3419, 6391, 6566, 3945, 4191, 1738, 1737, 6389, 3939, 8802, 8803, 8801, 3421, 50	1739	27	3398	1.954	2.19933e-05	1.29373e-06	0.000344857
REACTOME_PATHWAY	REACT_12034:Signaling by BMP	23	0.953566	4.34842e-06	659, 64750, 657, 658, 57154, 93, 92, 9241, 91851, 9350, 650, 7321, 64388, 11167, 7323, 9765, 4090, 4089, 6497, 4093, 4092, 4086, 4091	1739	23	3398	1.954	0.000282608	1.57025e-05	0.00443181
REACTOME_PATHWAY	REACT_9470:Signaling by FGFR	21	0.870647	8.75501e-05	9365, 26281, 27006, 2263, 2254, 2253, 2252, 2264, 2251, 2250, 8074, 2261, 2260, 2248, 8817, 8822, 2249, 2255, 2246, 2247, 9965	1739	22	3398	1.86518	0.00567484	0.000299482	0.0891949
REACTOME_PATHWAY	REACT_8017:APC-Cdc20 mediated degradation of Nek2A	21	0.870647	0.000347368	8881, 8697, 11065, 729948, 246184, 6233, 7311, 996, 7321, 10393, 64682, 7324, 4751, 728590, 991, 9184, 51434, 51433, 701, 29882, 51529, 4085, 29945	1739	23	3398	1.78408	0.0223297	0.0011285	0.353472
REACTOME_PATHWAY	REACT_6844:Signaling by TGF beta	15	0.621891	0.000643073	64750, 57154, 5045, 9372, 7321, 7040, 7323, 4088, 4089, 7048, 6497, 7046, 4092, 4091, 4087	1739	15	3398	1.954	0.0409511	0.00198912	0.653485
REACTOME_PATHWAY	REACT_299:Signaling by Notch	15	0.621891	0.00270764	3714, 4855, 4854, 54567, 4853, 4851, 55851, 5664, 5045, 51107, 28514, 182, 83464, 23385, 102	1739	16	3398	1.83187	0.161579	0.00797869	2.72553
REACTOME_PATHWAY	REACT_18266:Axon guidance	35	1.45108	0.00704235	1292, 1293, 3265, 1290, 1291, 1297, 5894, 3845, 1289, 1287, 1280, 6714, 5747, 1281, 7529, 1282, 5605, 375790, 9252, 1284, 1285, 1298, 5604, 1286, 1299, 1385, 2260, 4893, 2885, 1277, 5595, 2534, 1278, 6654, 5594	1739	49	3398	1.39571	0.36832	0.0197746	6.94965
REACTOME_PATHWAY	REACT_508:Signal attenuation	11	0.456053	0.00713808	1398, 3481, 2887, 2885, 6464, 5595, 3667, 3643, 723961, 3630, 8660, 1796, 6654	1739	11	3398	1.954	0.372266	0.0192146	7.04104
REACTOME_PATHWAY	REACT_12529:Signaling by VEGF	10	0.414594	0.0384229	8828, 7422, 8829, 7424, 7423, 2321, 56034, 3791, 2277, 2324	1739	11	3398	1.77636	0.921663	0.0968526	32.9229

## Sheet: GO_BP
Category	Term	Count	%	PValue	Genes	List Total	Pop Hits	Pop Total	Fold Enrichment	Bonferroni	Benjamini	FDR
GOTERM_BP_FAT	GO:0007166~cell surface receptor linked signal transduction	996	41.2935	0	940, 390445, 120787, 6870, 335, 3480, 6869, 5368, 3481, 6868, 6866, 6865, 390036, 390037, 6497, 390038, 120586, 222545, 930, 120776, 390433, 120775, 5362, 390431, 345, 390437, 5367, 390436, 348, 390439, 1812, 1813, 1814, 1816, 920, 729759, 129521, 1432, 390538, 728, 727, 119692, 1840, 390429, 919, 8440, 8239, 119695, 119694, 441639, 319100, 324, 23620, 915, 127385, 916, 917, 128674, 10076, 7321, …	2278	1856	13528	3.18685	0	0	0
GOTERM_BP_FAT	GO:0007186~G-protein coupled receptor protein signaling pathway	723	29.9751	1.48637745393E-313	151306, 805, 801, 6347, 390445, 120787, 6348, 156, 6870, 155, 154, 335, 59340, 391194, 6352, 153, 5368, 391196, 6869, 3481, 8321, 150, 151, 391195, 8322, 8323, 79501, 6866, 8324, 80834, 80835, 8325, 6865, 8326, 390036, 8877, 390037, 390038, 2852, 120586, 222545, 552891, 2015, 1325, 120776, 390433, 120775, 8111, 390431, 345, 391191, 207, 390437, 391192, 5367, 390436, 391190, 348, 6361, 6364, 39043…	2278	1123	13528	3.8233	6.73328986628913E-310	3.36664493314456E-310	2.79926449838854E-310
GOTERM_BP_FAT	GO:0007608~sensory perception of smell	318	13.1841	1.15365e-155	79473, 219484, 219482, 402135, 390445, 120787, 391194, 391196, 391195, 79339, 79501, 390054, 390059, 390036, 390199, 390037, 390058, 390038, 81099, 390195, 81282, 120586, 219493, 81392, 81285, 120776, 390433, 120775, 390431, 391191, 391192, 390437, 390436, 391190, 81399, 390061, 390439, 79324, 390063, 284383, 390064, 390066, 390067, 1813, 81696, 120065, 120066, 81697, 126370, 390321, 729759, 2827…	2278	431	13528	4.38157	5.22604e-152	1.74201e-152	2.17265e-152
GOTERM_BP_FAT	GO:0007606~sensory perception of chemical stimulus	328	13.5987	3.23437e-145	79473, 219484, 219482, 402135, 390445, 120787, 391194, 391196, 391195, 79339, 79501, 80834, 80835, 390054, 390059, 390036, 390199, 390037, 390058, 390038, 81099, 390195, 81282, 120586, 219493, 3710, 81392, 81285, 120776, 390433, 120775, 390431, 391191, 391192, 390437, 390436, 391190, 81399, 390061, 390439, 79324, 390063, 284383, 390064, 390066, 390067, 51764, 1813, 81696, 120065, 120066, 81697, 1…	2278	478	13528	4.07498	1.46517e-141	3.66292e-142	6.09122e-142
GOTERM_BP_FAT	GO:0050890~cognition	435	18.0348	5.54927e-113	390445, 120787, 391194, 5368, 391196, 6869, 391195, 79501, 80834, 80835, 8326, 390036, 390037, 390038, 120586, 120776, 120775, 390433, 390431, 391191, 391192, 390437, 50617, 390436, 391190, 409, 408, 390439, 8312, 1812, 1813, 120065, 1814, 120066, 1816, 390321, 729759, 282770, 10874, 282775, 23538, 390538, 728, 119692, 623, 390429, 119695, 119694, 441639, 23620, 282763, 127385, 611, 26716, 525, 3…	2278	909	13528	2.84188	2.51382e-109	5.02764e-110	1.04508e-109
GOTERM_BP_FAT	GO:0007600~sensory perception	396	16.4179	7.47757e-106	390445, 120787, 391194, 5368, 6869, 391196, 391195, 79501, 80834, 80835, 390036, 390037, 390038, 120586, 120776, 120775, 390433, 390431, 391191, 391192, 390437, 50617, 390436, 391190, 409, 408, 390439, 8312, 1813, 120065, 120066, 390321, 729759, 282770, 10874, 282775, 23538, 390538, 728, 119692, 623, 390429, 119695, 119694, 441639, 23620, 282763, 127385, 611, 26716, 525, 390882, 390883, 341276, 5…	2278	810	13528	2.90329	3.38734e-102	5.64557e-103	1.40824e-102
GOTERM_BP_FAT	GO:0043085~positive regulation of catalytic activity	303	12.5622	2.28013e-105	8881, 3084, 6772, 5733, 9861, 10203, 155, 154, 335, 153, 150, 64682, 6869, 3481, 151, 6868, 8877, 538, 65057, 5741, 5745, 5744, 55851, 3091, 2321, 344, 207, 348, 3717, 1594, 51764, 4221, 1812, 1813, 1814, 1816, 56923, 4609, 920, 5618, 3845, 6500, 7189, 81565, 728, 7040, 727, 623, 5347, 7048, 7046, 92335, 10316, 10213, 23620, 1062, 7321, 183, 7324, 185, 25913, 6385, 186, 2587, 23385, 121512, 3932,…	2278	520	13528	3.46034	1.0329e-101	1.47557e-102	4.29412e-102
GOTERM_BP_FAT	GO:0050877~neurological system process	501	20.7711	2.67873e-101	390445, 120787, 391194, 5368, 391196, 6869, 391195, 79501, 80834, 80835, 8326, 390036, 390037, 390038, 120586, 1325, 120776, 120775, 390433, 390431, 391191, 391192, 390437, 50617, 5367, 390436, 391190, 348, 409, 408, 390439, 8312, 1812, 1813, 120065, 1814, 120066, 1816, 390321, 729759, 6750, 282770, 10874, 282775, 23538, 390538, 728, 119692, 623, 390429, 119695, 2831, 119694, 441639, 814, 23620, …	2278	1210	13528	2.45885	1.21346e-97	1.51683e-98	5.0448e-98
GOTERM_BP_FAT	GO:0044093~positive regulation of molecular function	317	13.1426	1.54774e-98	8881, 805, 3084, 6772, 801, 5733, 9861, 10203, 155, 154, 335, 153, 4615, 150, 64682, 6869, 3481, 151, 6868, 8877, 538, 65057, 6497, 5741, 5745, 5744, 55851, 3091, 2321, 344, 207, 348, 3717, 1594, 51764, 4221, 1812, 1813, 1814, 1816, 56923, 4609, 920, 5618, 3845, 6500, 7189, 81565, 728, 7040, 727, 623, 5347, 7048, 7046, 92335, 815, 10316, 10213, 23620, 1062, 7321, 183, 7324, 185, 25913, 6385, 186,…	2278	586	13528	3.21249	7.01128e-95	7.79031e-96	2.91483e-95
GOTERM_BP_FAT	GO:0019932~second-messenger-mediated signaling	179	7.42123	5.66002e-90	5734, 5733, 6347, 3479, 10203, 5739, 155, 154, 153, 3480, 6869, 8877, 5741, 5745, 222545, 5744, 1325, 4886, 4887, 348, 59350, 2847, 51764, 1812, 1813, 1814, 1816, 56923, 6752, 6753, 6751, 121504, 554313, 23620, 10316, 183, 2829, 185, 2587, 186, 6755, 6754, 51289, 114, 115, 112, 113, 4852, 111, 846, 7253, 378708, 10381, 8360, 8362, 8361, 8364, 8363, 701, 8366, 8365, 8368, 4157, 8367, 4159, 4158, 1…	2278	235	13528	4.5234	2.56399e-86	2.56399e-87	1.06594e-86
GOTERM_BP_FAT	GO:0007242~intracellular signaling cascade	488	20.2322	1.74802e-86	6774, 941, 29127, 6772, 54106, 6347, 59345, 3479, 155, 154, 335, 3480, 153, 3481, 150, 6869, 151, 8878, 8877, 10718, 6093, 222545, 552891, 8874, 1325, 345, 207, 5364, 348, 59350, 2847, 545, 6777, 84894, 1812, 7200, 6776, 1813, 1814, 1816, 6752, 8243, 6753, 6751, 51291, 1432, 728, 727, 1848, 1846, 1445, 5241, 648152, 23620, 23526, 10603, 183, 651610, 5335, 185, 2829, 5337, 5338, 186, 613, 6755, 67…	2278	1256	13528	2.30733	7.91852e-83	7.19866e-84	3.29201e-83
GOTERM_BP_FAT	GO:0000278~mitotic cell cycle	212	8.78939	5.75047e-71	8881, 8317, 332, 9861, 64682, 6868, 207, 11339, 23122, 10726, 55920, 8243, 23397, 347733, 25777, 22919, 7329, 6500, 348235, 1069, 5347, 8239, 10735, 815, 816, 817, 818, 10592, 10213, 324, 1062, 9183, 7321, 9181, 1058, 7324, 9184, 203068, 23383, 728642, 147841, 64151, 984, 3624, 9700, 983, 729012, 9491, 2249, 10381, 9493, 701, 4157, 51529, 3619, 5708, 5709, 5706, 5604, 5707, 5704, 8065, 5705, 5702…	2278	370	13528	3.40262	2.60496e-67	2.1708e-68	1.08297e-67
GOTERM_BP_FAT	GO:0007187~G-protein signaling, coupled to cyclic nucleotide second messenger	104	4.31177	2.05143e-66	64805, 2642, 5734, 5733, 1395, 6347, 1394, 9340, 10203, 5739, 155, 154, 153, 5741, 5745, 5744, 1325, 1901, 1903, 122042, 4886, 4887, 3352, 3351, 3354, 59350, 3350, 2847, 1812, 1813, 1814, 1816, 6752, 6753, 6751, 1129, 2770, 2771, 109, 108, 107, 1269, 1268, 799, 5567, 2776, 2778, 2774, 2781, 183, 2829, 7433, 2587, 186, 6755, 6754, 2914, 114, 115, 112, 113, 4852, 2916, 11255, 111, 7253, 378708, 103…	2278	115	13528	5.37051	9.29297e-63	7.14844e-64	3.86341e-63
GOTERM_BP_FAT	GO:0019935~cyclic-nucleotide-mediated signaling	111	4.60199	3.95855e-65	64805, 2642, 5734, 5733, 1395, 6347, 2740, 9340, 1394, 10203, 5739, 155, 154, 153, 5741, 5745, 5744, 1325, 1901, 1903, 122042, 4886, 4887, 348, 3352, 3351, 3354, 59350, 3350, 2847, 1812, 1813, 1814, 1816, 6752, 6753, 6751, 1129, 2770, 2771, 109, 108, 107, 1269, 1268, 799, 5567, 2776, 2778, 5150, 2774, 2781, 183, 2829, 7433, 2587, 186, 6755, 6754, 2914, 114, 115, 112, 113, 2916, 4852, 11255, 111, …	2278	130	13528	5.0706	1.79322e-61	1.28087e-62	7.45505e-62
GOTERM_BP_FAT	GO:0022402~cell cycle process	259	10.738	1.71986e-60	8881, 29127, 8317, 332, 9861, 64682, 6868, 23645, 207, 1594, 11339, 4221, 23122, 4609, 10726, 55920, 8243, 9985, 23397, 347733, 25777, 22919, 7329, 55722, 6500, 348235, 7040, 1069, 5347, 8239, 10734, 10735, 815, 816, 8850, 817, 818, 10592, 324, 10213, 1062, 9183, 7321, 9181, 651610, 1058, 7324, 9184, 203068, 23383, 728642, 7057, 147841, 4853, 64151, 10388, 8841, 984, 729012, 9700, 3624, 983, 9491…	2278	565	13528	2.72227	7.79099e-57	5.19399e-58	3.23899e-57
GOTERM_BP_FAT	GO:0007049~cell cycle	314	13.0182	2.15564e-58	8881, 805, 29127, 801, 8317, 332, 9861, 8318, 64682, 6868, 3714, 23645, 207, 1594, 11339, 114799, 545, 4221, 23122, 4609, 10726, 55920, 8243, 9985, 347733, 23397, 27183, 25777, 7329, 22919, 55722, 6500, 348235, 7040, 1069, 5347, 8239, 10734, 10735, 92335, 648152, 815, 8850, 816, 817, 10592, 818, 324, 10213, 1062, 9183, 7321, 9181, 651610, 7324, 1058, 9184, 23383, 203068, 808, 728642, 7057, 63967,…	2278	776	13528	2.40297	9.76504e-55	6.10315e-56	4.05967e-55
GOTERM_BP_FAT	GO:0030817~regulation of cAMP biosynthetic process	87	3.60697	1.48756e-51	2914, 116, 117, 2912, 114, 2913, 115, 2918, 112, 2642, 113, 2916, 111, 2917, 11255, 2740, 1394, 10203, 155, 154, 7253, 153, 150, 378708, 11251, 5741, 165140, 5745, 1133, 5744, 1325, 1901, 5032, 1903, 196883, 122042, 4886, 1906, 4887, 1909, 3351, 3350, 2847, 1812, 1813, 1814, 1816, 134, 6752, 135, 1910, 8698, 136, 3363, 2770, 8484, 2771, 4987, 4988, 2696, 4985, 8811, 109, 4986, 108, 56413, 107, 72…	2278	101	13528	5.11538	6.73864e-48	3.9639e-49	2.80149e-48
GOTERM_BP_FAT	GO:0043086~negative regulation of catalytic activity	157	6.50912	1.95597e-51	8881, 332, 9861, 336, 335, 3481, 64682, 150, 538, 51422, 57761, 1325, 5170, 1901, 1903, 345, 207, 122042, 4886, 4887, 348, 1594, 3350, 2847, 84335, 728590, 4221, 1812, 51434, 1813, 51433, 1814, 4790, 1816, 6752, 1910, 51291, 2770, 2771, 109, 108, 56413, 10013, 107, 729230, 1848, 4092, 5699, 4091, 5698, 10213, 324, 2779, 26271, 2773, 9568, 2774, 996, 7321, 2280, 2781, 7324, 9184, 2587, 991, 25913,…	2278	277	13528	3.36589	8.86056e-48	4.92253e-49	3.68364e-48
GOTERM_BP_FAT	GO:0030814~regulation of cAMP metabolic process	87	3.60697	4.02348e-50	2914, 116, 117, 2912, 114, 2913, 115, 2918, 112, 2642, 113, 2916, 111, 2917, 11255, 2740, 1394, 10203, 155, 154, 7253, 153, 150, 378708, 11251, 5741, 165140, 5745, 1133, 5744, 1325, 1901, 5032, 1903, 196883, 122042, 4886, 1906, 4887, 1909, 3351, 3350, 2847, 1812, 1813, 1814, 1816, 134, 6752, 135, 1910, 8698, 136, 3363, 2770, 8484, 2771, 4987, 4988, 2696, 4985, 8811, 109, 4986, 108, 56413, 107, 72…	2278	103	13528	5.01605	1.82264e-46	9.59282e-48	7.57733e-47
GOTERM_BP_FAT	GO:0045761~regulation of adenylate cyclase activity	83	3.44113	2.00939e-49	2914, 116, 117, 2912, 114, 2913, 115, 2918, 112, 2642, 113, 2916, 111, 2917, 11255, 2740, 1394, 10203, 155, 154, 7253, 153, 150, 378708, 11251, 5741, 5745, 1133, 5744, 1325, 1901, 5032, 1903, 196883, 122042, 4886, 4887, 1909, 3350, 2847, 1812, 1813, 1814, 1816, 134, 6752, 135, 1910, 8698, 136, 3363, 2770, 8484, 2771, 4987, 4988, 2696, 4985, 8811, 109, 4986, 108, 56413, 107, 729230, 554, 2550, 799…	2278	96	13528	5.13436	9.10255e-46	4.55127e-47	3.78425e-46
GOTERM_BP_FAT	GO:0019933~cAMP-mediated signaling	82	3.39967	1.0499e-48	2914, 114, 115, 64805, 112, 2642, 113, 2916, 5734, 5733, 111, 1395, 2740, 9340, 1394, 10203, 155, 154, 7253, 153, 378708, 11251, 5741, 4159, 5745, 1133, 5744, 1325, 1901, 1903, 196883, 122042, 4886, 4887, 1232, 59350, 3350, 2847, 4160, 1812, 1813, 1814, 1816, 6752, 134, 135, 133, 2357, 8698, 136, 3361, 1129, 3363, 2770, 2771, 4987, 2696, 4988, 4985, 8811, 109, 4986, 108, 107, 554, 146, 147, 4724,…	2278	95	13528	5.1259	4.75605e-45	2.26479e-46	1.97726e-45
GOTERM_BP_FAT	GO:0044092~negative regulation of molecular function	171	7.08955	8.84466e-48	8881, 805, 801, 9241, 332, 9861, 336, 155, 335, 154, 3481, 150, 64682, 538, 51773, 51422, 57761, 5744, 1325, 5170, 1901, 1903, 345, 207, 122042, 4886, 348, 4887, 3717, 1594, 6608, 3350, 2847, 84335, 728590, 4221, 1812, 51434, 1813, 51433, 1814, 4790, 1816, 4792, 6752, 1910, 51291, 2770, 2771, 109, 108, 56413, 10013, 107, 729230, 1848, 4092, 5699, 4091, 5698, 10213, 9759, 324, 2779, 26271, 2773, 9…	2278	334	13528	3.04039	4.00663e-44	1.8212e-45	1.6657e-44
GOTERM_BP_FAT	GO:0019220~regulation of phosphate metabolic process	216	8.95522	1.19817e-47	941, 440917, 3084, 3479, 335, 154, 3481, 150, 6868, 151, 253260, 538, 8877, 57761, 2321, 207, 3717, 348, 8312, 4221, 1812, 1816, 920, 5618, 3845, 7189, 7040, 728, 727, 623, 8440, 7048, 624, 7046, 1848, 4092, 4091, 8851, 92335, 324, 916, 1062, 2965, 183, 186, 6385, 121512, 7057, 114, 115, 84432, 112, 113, 111, 7249, 3624, 2475, 80310, 4254, 2247, 7852, 160851, 5604, 3815, 5925, 196883, 836, 7248, …	2278	485	13528	2.64479	5.42769e-44	2.35987e-45	2.25648e-44
GOTERM_BP_FAT	GO:0051174~regulation of phosphorus metabolic process	216	8.95522	1.19817e-47	941, 440917, 3084, 3479, 335, 154, 3481, 150, 6868, 151, 253260, 538, 8877, 57761, 2321, 207, 3717, 348, 8312, 4221, 1812, 1816, 920, 5618, 3845, 7189, 7040, 728, 727, 623, 8440, 7048, 624, 7046, 1848, 4092, 4091, 8851, 92335, 324, 916, 1062, 2965, 183, 186, 6385, 121512, 7057, 114, 115, 84432, 112, 113, 111, 7249, 3624, 2475, 80310, 4254, 2247, 7852, 160851, 5604, 3815, 5925, 196883, 836, 7248, …	2278	485	13528	2.64479	5.42769e-44	2.35987e-45	2.25648e-44
GOTERM_BP_FAT	GO:0007188~G-protein signaling, coupled to cAMP nucleotide second messenger	76	3.15091	1.70874e-47	2914, 114, 115, 64805, 112, 2642, 113, 2916, 5734, 5733, 111, 1395, 9340, 1394, 10203, 155, 154, 7253, 153, 378708, 11251, 5741, 4159, 5745, 1133, 5744, 1325, 1901, 1903, 196883, 122042, 4886, 4887, 1232, 59350, 3350, 2847, 4160, 1812, 1813, 1814, 1816, 6752, 134, 135, 2357, 8698, 136, 1129, 3363, 2770, 2771, 4987, 2696, 4988, 4985, 8811, 109, 4986, 108, 107, 554, 146, 147, 799, 5567, 2776, 2778,…	2278	85	13528	5.30976	7.74057e-44	3.22524e-45	3.21803e-44
GOTERM_BP_FAT	GO:0051339~regulation of lyase activity	84	3.48259	2.50861e-47	2914, 116, 117, 2912, 114, 2913, 115, 2918, 112, 2642, 113, 2916, 111, 2917, 11255, 2740, 1394, 10203, 155, 154, 7253, 153, 150, 378708, 11251, 5741, 5745, 1133, 5744, 1325, 1901, 5032, 1903, 196883, 122042, 4886, 4887, 1909, 3350, 2847, 1812, 1813, 1814, 1816, 134, 6752, 135, 1910, 8698, 136, 3363, 2770, 8484, 2771, 4987, 4988, 2696, 4985, 8811, 109, 4986, 108, 56413, 107, 729230, 554, 2395, 255…	2278	101	13528	4.93899	1.1364e-43	4.54559e-45	4.72441e-44
GOTERM_BP_FAT	GO:0042325~regulation of phosphorylation	210	8.70647	2.66249e-47	941, 3084, 3479, 335, 154, 3481, 150, 6868, 151, 253260, 538, 8877, 57761, 2321, 207, 3717, 348, 8312, 1812, 4221, 1816, 920, 5618, 3845, 7189, 7040, 728, 727, 623, 8440, 7048, 624, 7046, 1848, 4092, 4091, 8851, 92335, 324, 916, 1062, 2965, 183, 6385, 121512, 7057, 114, 115, 84432, 112, 113, 111, 7249, 3624, 2475, 80310, 4254, 2247, 7852, 160851, 5604, 3815, 5925, 196883, 836, 7248, 5500, 4089, 5…	2278	466	13528	2.67617	1.20611e-43	4.63888e-45	5.01421e-44
GOTERM_BP_FAT	GO:0031279~regulation of cyclase activity	83	3.44113	2.71361e-47	2914, 116, 117, 2912, 114, 2913, 115, 2918, 112, 2642, 113, 2916, 111, 2917, 11255, 2740, 1394, 10203, 155, 154, 7253, 153, 150, 378708, 11251, 5741, 5745, 1133, 5744, 1325, 1901, 5032, 1903, 196883, 122042, 4886, 4887, 1909, 3350, 2847, 1812, 1813, 1814, 1816, 134, 6752, 135, 1910, 8698, 136, 3363, 2770, 8484, 2771, 4987, 4988, 2696, 4985, 8811, 109, 4986, 108, 56413, 107, 729230, 554, 2550, 799…	2278	99	13528	4.97878	1.22927e-43	4.55284e-45	5.11049e-44
GOTERM_BP_FAT	GO:0051439~regulation of ubiquitin-protein ligase activity during mitotic cell cycle	68	2.81924	2.96358e-47	8881, 5682, 9861, 5686, 5685, 5684, 5683, 983, 9491, 10393, 64682, 701, 51529, 5708, 5709, 5706, 5707, 5691, 5704, 5690, 5705, 5693, 5702, 5692, 5700, 5695, 5701, 5694, 7311, 5696, 5687, 5688, 5689, 8454, 728590, 51434, 51433, 29882, 29945, 4085, 652826, 5717, 5718, 5719, 8697, 729948, 5710, 8945, 5711, 5713, 5714, 5715, 6500, 5716, 51343, 5347, 5699, 5698, 11065, 10213, 5720, 246184, 5721, 26271…	2278	71	13528	5.68762	1.3425e-43	4.79465e-45	5.58126e-44
GOTERM_BP_FAT	GO:0030808~regulation of nucleotide biosynthetic process	88	3.64842	5.71952e-47	2914, 116, 117, 2912, 114, 2913, 115, 2918, 112, 2642, 113, 2916, 111, 2917, 11255, 2740, 1394, 10203, 155, 154, 7253, 153, 150, 378708, 11251, 5741, 165140, 5745, 1133, 5744, 1325, 1901, 5032, 1903, 196883, 122042, 4886, 1906, 348, 4887, 1909, 3351, 3350, 2847, 1812, 1813, 1814, 1816, 134, 6752, 135, 1910, 8698, 136, 3363, 2770, 8484, 2771, 4987, 4988, 2696, 4985, 8811, 109, 4986, 108, 56413, 10…	2278	110	13528	4.75083	2.59094e-43	8.93429e-45	1.07715e-43
GOTERM_BP_FAT	GO:0030802~regulation of cyclic nucleotide biosynthetic process	88	3.64842	5.71952e-47	2914, 116, 117, 2912, 114, 2913, 115, 2918, 112, 2642, 113, 2916, 111, 2917, 11255, 2740, 1394, 10203, 155, 154, 7253, 153, 150, 378708, 11251, 5741, 165140, 5745, 1133, 5744, 1325, 1901, 5032, 1903, 196883, 122042, 4886, 1906, 348, 4887, 1909, 3351, 3350, 2847, 1812, 1813, 1814, 1816, 134, 6752, 135, 1910, 8698, 136, 3363, 2770, 8484, 2771, 4987, 4988, 2696, 4985, 8811, 109, 4986, 108, 56413, 10…	2278	110	13528	4.75083	2.59094e-43	8.93429e-45	1.07715e-43
GOTERM_BP_FAT	GO:0006119~oxidative phosphorylation	82	3.39967	1.37458e-46	4698, 4697, 374291, 4519, 535, 533, 4513, 539, 4512, 4514, 506, 509, 9296, 50617, 23545, 4508, 7381, 4509, 9114, 10476, 4695, 4696, 4694, 7388, 7385, 7384, 4709, 4707, 4708, 4705, 4706, 4541, 4704, 4701, 4540, 4702, 4700, 10975, 51606, 4731, 90423, 4538, 513, 4539, 4536, 727947, 4537, 4535, 10632, 245972, 8992, 245973, 516, 515, 514, 2395, 4716, 4728, 4717, 10312, 4718, 4719, 4729, 4712, 4724, 17…	2278	98	13528	4.96898	6.22685e-43	2.07562e-44	2.58872e-43
GOTERM_BP_FAT	GO:0007610~behavior	209	8.66501	3.98412e-46	6774, 6349, 6347, 6348, 79902, 51083, 6352, 6351, 6869, 1583, 6356, 8326, 6354, 538, 4889, 4886, 5367, 4887, 6361, 6364, 4893, 6363, 6366, 2847, 6367, 1812, 7200, 1813, 1814, 1816, 56923, 55558, 6360, 129521, 1432, 10874, 3845, 728, 6376, 727, 2837, 6375, 6374, 6373, 6372, 729230, 6370, 2834, 2833, 5898, 6387, 2826, 719, 183, 5337, 2829, 186, 3627, 114, 23236, 4852, 7249, 10850, 846, 7253, 2247, …	2278	469	13528	2.64639	1.80481e-42	5.82196e-44	7.50322e-43
GOTERM_BP_FAT	GO:0016310~phosphorylation	297	12.3134	6.18213e-46	6772, 8317, 6347, 156, 3480, 374291, 150, 4519, 151, 535, 6356, 533, 4513, 539, 4512, 4514, 57761, 6093, 5747, 2321, 2324, 50617, 207, 208, 3718, 3717, 4508, 29904, 4509, 10476, 545, 6776, 7204, 1457, 1459, 1453, 1452, 5618, 1432, 1455, 1454, 10087, 513, 728, 7040, 727, 5347, 7048, 7046, 516, 10733, 4092, 515, 514, 1445, 8851, 92335, 814, 648152, 815, 10312, 816, 817, 818, 130399, 51382, 522, 521…	2278	800	13528	2.20468	2.80051e-42	8.75158e-44	1.16427e-42
GOTERM_BP_FAT	GO:0030799~regulation of cyclic nucleotide metabolic process	88	3.64842	3.01772e-45	2914, 116, 117, 2912, 114, 2913, 115, 2918, 112, 2642, 113, 2916, 111, 2917, 11255, 2740, 1394, 10203, 155, 154, 7253, 153, 150, 378708, 11251, 5741, 165140, 5745, 1133, 5744, 1325, 1901, 5032, 1903, 196883, 122042, 4886, 1906, 348, 4887, 1909, 3351, 3350, 2847, 1812, 1813, 1814, 1816, 134, 6752, 135, 1910, 8698, 136, 3363, 2770, 8484, 2771, 4987, 4988, 2696, 4985, 8811, 109, 4986, 108, 56413, 10…	2278	113	13528	4.62471	1.36703e-41	4.14251e-43	5.68322e-42
GOTERM_BP_FAT	GO:0051338~regulation of transferase activity	179	7.42123	3.94887e-45	10818, 55437, 2149, 3084, 335, 154, 3481, 150, 6868, 151, 8525, 7804, 8526, 885, 8877, 8527, 65057, 51422, 57761, 11140, 4035, 2321, 5170, 1902, 207, 1906, 1907, 3717, 348, 1909, 1908, 7410, 84335, 4221, 1812, 5934, 5933, 1816, 920, 5618, 56034, 3845, 1128, 440577, 2785, 7189, 2771, 2069, 728, 7040, 727, 623, 9162, 109, 108, 5562, 107, 8440, 7048, 7046, 1848, 595, 2395, 8851, 92335, 5155, 93, 556…	2278	372	13528	2.85752	1.78884e-41	5.26129e-43	7.43684e-42
GOTERM_BP_FAT	GO:0051437~positive regulation of ubiquitin-protein ligase activity during mitotic cell cycle	65	2.69486	5.59534e-45	8881, 5682, 9861, 5686, 5685, 5684, 5683, 983, 9491, 10393, 64682, 51529, 5708, 5709, 5706, 5707, 5691, 5704, 5690, 5705, 5693, 5702, 5692, 5700, 5695, 5701, 5694, 7311, 5696, 5687, 5688, 5689, 8454, 728590, 51434, 51433, 29882, 29945, 652826, 5717, 5718, 5719, 8697, 729948, 5710, 8945, 5711, 5713, 5714, 5715, 6500, 5716, 51343, 5347, 5699, 5698, 11065, 10213, 5720, 246184, 5721, 26271, 6233, 996…	2278	68	13528	5.67655	2.53469e-41	7.24197e-43	1.05376e-41
GOTERM_BP_FAT	GO:0051444~negative regulation of ubiquitin-protein ligase activity	64	2.6534	3.20183e-44	8881, 5682, 9861, 5686, 5685, 5684, 5683, 9491, 10393, 64682, 701, 51529, 5708, 5709, 5706, 5707, 5691, 5704, 5690, 5705, 5693, 5702, 5692, 5700, 5695, 5701, 5694, 7311, 5696, 5687, 5688, 5689, 728590, 51434, 51433, 29882, 4085, 29945, 652826, 5717, 5718, 5719, 8697, 729948, 5710, 1029, 5711, 5713, 5714, 5715, 5716, 51343, 5699, 4092, 5698, 11065, 10213, 5720, 246184, 5721, 26271, 6233, 996, 7321…	2278	67	13528	5.67264	1.45043e-40	4.02896e-42	6.02993e-41
GOTERM_BP_FAT	GO:0051352~negative regulation of ligase activity	64	2.6534	3.20183e-44	8881, 5682, 9861, 5686, 5685, 5684, 5683, 9491, 10393, 64682, 701, 51529, 5708, 5709, 5706, 5707, 5691, 5704, 5690, 5705, 5693, 5702, 5692, 5700, 5695, 5701, 5694, 7311, 5696, 5687, 5688, 5689, 728590, 51434, 51433, 29882, 4085, 29945, 652826, 5717, 5718, 5719, 8697, 729948, 5710, 1029, 5711, 5713, 5714, 5715, 5716, 51343, 5699, 4092, 5698, 11065, 10213, 5720, 246184, 5721, 26271, 6233, 996, 7321…	2278	67	13528	5.67264	1.45043e-40	4.02896e-42	6.02993e-41
GOTERM_BP_FAT	GO:0031397~negative regulation of protein ubiquitination	68	2.81924	3.20429e-44	8881, 5682, 9861, 5686, 5685, 5684, 5683, 9491, 10393, 64682, 701, 5582, 51529, 5708, 5709, 5706, 5707, 5691, 5704, 5690, 5705, 5693, 5702, 5692, 5700, 5695, 5701, 5694, 51160, 7311, 5696, 5687, 5688, 5689, 7248, 728590, 51434, 51433, 29882, 29945, 4085, 652826, 5717, 5718, 5719, 8697, 729948, 5710, 1029, 5711, 5713, 5714, 5715, 5716, 51343, 5699, 4092, 5698, 11065, 10213, 5720, 246184, 5721, 262…	2278	74	13528	5.45704	1.45154e-40	3.92308e-42	6.03457e-41
GOTERM_BP_FAT	GO:0043549~regulation of kinase activity	173	7.17247	3.94818e-44	10818, 55437, 2149, 3084, 154, 3481, 150, 6868, 151, 8525, 7804, 885, 8877, 8526, 8527, 51422, 57761, 11140, 4035, 2321, 5170, 1902, 207, 1906, 1907, 3717, 348, 1909, 1908, 7410, 84335, 4221, 1812, 5934, 5933, 1816, 920, 5618, 56034, 3845, 1128, 440577, 2785, 7189, 2771, 2069, 728, 7040, 727, 623, 9162, 109, 108, 5562, 107, 8440, 7048, 7046, 1848, 595, 8851, 92335, 5155, 93, 1111, 5566, 324, 5567…	2278	357	13528	2.87778	1.78853e-40	4.70665e-42	7.43554e-41
GOTERM_BP_FAT	GO:0051438~regulation of ubiquitin-protein ligase activity	70	2.90216	6.11899e-44	8881, 5682, 9861, 5686, 5685, 5684, 5683, 983, 9491, 10393, 64682, 701, 51529, 5708, 5709, 5706, 5707, 5691, 5704, 5690, 5705, 5693, 5702, 5692, 5700, 5695, 5701, 5694, 7311, 5696, 5687, 5688, 5689, 8454, 728590, 51434, 51433, 29882, 29945, 4085, 652826, 5717, 5718, 5719, 8697, 729948, 5710, 8945, 1029, 5711, 5713, 5714, 5715, 6500, 5716, 51343, 5347, 5699, 4092, 5698, 11065, 10213, 5720, 246184,…	2278	78	13528	5.32946	2.7719e-40	7.10745e-42	1.15238e-40
GOTERM_BP_FAT	GO:0006140~regulation of nucleotide metabolic process	88	3.64842	1.22628e-43	2914, 116, 117, 2912, 114, 2913, 115, 2918, 112, 2642, 113, 2916, 111, 2917, 11255, 2740, 1394, 10203, 155, 154, 7253, 153, 150, 378708, 11251, 5741, 165140, 5745, 1133, 5744, 1325, 1901, 5032, 1903, 196883, 122042, 4886, 1906, 348, 4887, 1909, 3351, 3350, 2847, 1812, 1813, 1814, 1816, 134, 6752, 135, 1910, 8698, 136, 3363, 2770, 8484, 2771, 4987, 4988, 2696, 4985, 8811, 109, 4986, 108, 56413, 10…	2278	116	13528	4.5051	5.55503e-40	1.38876e-41	2.30942e-40
GOTERM_BP_FAT	GO:0051443~positive regulation of ubiquitin-protein ligase activity	65	2.69486	6.2897e-43	8881, 5682, 9861, 5686, 5685, 5684, 5683, 983, 9491, 10393, 64682, 51529, 5708, 5709, 5706, 5707, 5691, 5704, 5690, 5705, 5693, 5702, 5692, 5700, 5695, 5701, 5694, 7311, 5696, 5687, 5688, 5689, 8454, 728590, 51434, 51433, 29882, 29945, 652826, 5717, 5718, 5719, 8697, 729948, 5710, 8945, 5711, 5713, 5714, 5715, 6500, 5716, 51343, 5347, 5699, 5698, 11065, 10213, 5720, 246184, 5721, 26271, 6233, 996…	2278	70	13528	5.51436	2.84923e-39	6.94935e-41	1.18453e-39
GOTERM_BP_FAT	GO:0051301~cell division	152	6.30182	7.04658e-43	8881, 5950, 29127, 8317, 332, 10403, 64946, 64682, 79003, 6093, 9918, 79980, 9735, 11339, 54820, 54821, 55055, 51434, 23122, 51433, 10726, 55920, 8243, 11130, 8556, 79023, 23397, 113130, 5048, 27183, 7329, 22919, 2068, 348235, 25909, 1069, 10274, 5347, 8239, 54069, 10735, 595, 8379, 4174, 890, 699, 10592, 80254, 9564, 324, 1062, 26271, 151648, 9232, 9183, 57405, 994, 9181, 995, 993, 83540, 990, 9…	2278	295	13528	3.05986	3.1921e-39	7.60023e-41	1.32707e-39
GOTERM_BP_FAT	GO:0031145~anaphase-promoting complex-dependent proteasomal ubiquitin-dependent protein catabolic process	62	2.57048	1.04429e-42	8881, 5682, 9861, 5686, 5685, 5684, 5683, 983, 9491, 10393, 64682, 701, 51529, 5708, 5709, 5706, 5707, 5691, 5704, 5690, 5705, 5693, 5702, 5692, 5700, 5695, 5701, 5694, 7311, 5696, 5687, 5688, 5689, 728590, 51434, 51433, 29882, 4085, 29945, 652826, 5717, 5718, 5719, 8697, 729948, 5710, 5711, 5713, 5714, 5715, 5716, 5699, 5698, 11065, 10213, 5720, 246184, 5721, 6233, 996, 7321, 7324, 991, 9184, 891	2278	65	13528	5.66446	4.73061e-39	1.10014e-40	1.96668e-39
GOTERM_BP_FAT	GO:0051436~negative regulation of ubiquitin-protein ligase activity during mitotic cell cycle	62	2.57048	1.04429e-42	8881, 5682, 9861, 5686, 5685, 5684, 5683, 9491, 10393, 64682, 701, 51529, 5708, 5709, 5706, 5707, 5691, 5704, 5705, 5690, 5693, 5702, 5692, 5700, 5695, 5701, 5694, 7311, 5696, 5687, 5688, 5689, 728590, 51434, 51433, 29882, 4085, 29945, 652826, 5717, 5718, 5719, 8697, 729948, 5710, 5711, 5713, 5714, 5715, 5716, 51343, 5699, 5698, 11065, 10213, 5720, 246184, 5721, 26271, 6233, 996, 7321, 7324, 991,…	2278	65	13528	5.66446	4.73061e-39	1.10014e-40	1.96668e-39
GOTERM_BP_FAT	GO:0022403~cell cycle phase	187	7.7529	3.14911e-42	8881, 332, 8317, 64682, 6868, 207, 11339, 23122, 10726, 8243, 55920, 9985, 347733, 23397, 22919, 7329, 25777, 348235, 1069, 5347, 8239, 10734, 10735, 815, 816, 817, 10592, 818, 324, 1062, 9183, 9181, 651610, 9184, 23383, 203068, 728642, 147841, 64151, 10388, 8841, 984, 9700, 983, 3624, 729012, 2249, 10381, 9493, 701, 51529, 4157, 5116, 9611, 3619, 5604, 8065, 5925, 9212, 3955, 121441, 8454, 5500,…	2278	414	13528	2.68239	1.42655e-38	3.24215e-40	5.93065e-39
GOTERM_BP_FAT	GO:0031399~regulation of protein modification process	151	6.26036	3.83192e-42	8881, 2147, 941, 440917, 3479, 9861, 335, 3481, 64682, 6868, 885, 253260, 51422, 5159, 672, 51160, 1906, 3717, 1909, 64223, 3689, 8312, 728590, 4221, 51434, 51433, 920, 1910, 57154, 10273, 56034, 8945, 8651, 6500, 7040, 623, 7424, 5347, 9021, 624, 7046, 4092, 5699, 4091, 5698, 595, 10411, 7529, 5154, 5155, 92, 10213, 9759, 916, 26277, 26271, 996, 7321, 2280, 7324, 183, 5573, 5576, 9184, 991, 5575…	2278	295	13528	3.03973	1.73586e-38	3.85747e-40	7.21658e-39
GOTERM_BP_FAT	GO:0045859~regulation of protein kinase activity	166	6.88226	7.9735e-42	10818, 55437, 2149, 3084, 154, 3481, 150, 6868, 151, 8525, 7804, 885, 8877, 8526, 8527, 51422, 57761, 11140, 4035, 2321, 5170, 1902, 207, 1906, 1907, 3717, 348, 1909, 1908, 84335, 4221, 1812, 1816, 920, 5618, 56034, 3845, 1128, 440577, 2785, 7189, 2771, 2069, 728, 7040, 727, 623, 9162, 109, 108, 5562, 107, 8440, 7048, 7046, 1848, 595, 8851, 92335, 5155, 93, 1111, 5566, 324, 5567, 5568, 796, 1062,…	2278	345	13528	2.85739	3.612e-38	7.85216e-40	1.50163e-38
GOTERM_BP_FAT	GO:0051340~regulation of ligase activity	70	2.90216	1.38565e-41	8881, 5682, 9861, 5686, 5685, 5684, 5683, 983, 9491, 10393, 64682, 701, 51529, 5708, 5709, 5706, 5707, 5691, 5704, 5690, 5705, 5693, 5702, 5692, 5700, 5695, 5701, 5694, 7311, 5696, 5687, 5688, 5689, 8454, 728590, 51434, 51433, 29882, 29945, 4085, 652826, 5717, 5718, 5719, 8697, 729948, 5710, 8945, 1029, 5711, 5713, 5714, 5715, 6500, 5716, 51343, 5347, 5699, 4092, 5698, 11065, 10213, 5720, 246184,…	2278	81	13528	5.13207	6.27699e-38	1.33553e-39	2.60956e-38
GOTERM_BP_FAT	GO:0031396~regulation of protein ubiquitination	79	3.27529	2.05775e-41	8881, 5682, 9861, 5686, 5685, 5684, 5683, 983, 9491, 10393, 64682, 701, 5582, 51529, 5708, 5709, 672, 5706, 5707, 5691, 5704, 5690, 5705, 5693, 5702, 5692, 5700, 5695, 5701, 5694, 51160, 7311, 5696, 5687, 5688, 5689, 8454, 7248, 8312, 728590, 51434, 51433, 29882, 29945, 4085, 5717, 652826, 5718, 5719, 57154, 8697, 729948, 10273, 5710, 8945, 1029, 5711, 5713, 5714, 5715, 6500, 5716, 51343, 5347, 5…	2278	100	13528	4.69145	9.3216e-38	1.942e-39	3.87531e-38
GOTERM_BP_FAT	GO:0006796~phosphate metabolic process	329	13.6401	4.59892e-41	6772, 8317, 6347, 27068, 156, 3480, 374291, 150, 4519, 151, 535, 6356, 533, 539, 4513, 4512, 4514, 57761, 6093, 5747, 2321, 2324, 207, 50617, 208, 3718, 3717, 4508, 29904, 4509, 10476, 545, 6776, 7204, 1457, 1459, 1453, 1452, 5618, 1432, 1455, 1454, 10087, 513, 728, 7040, 727, 5347, 7048, 1849, 7046, 516, 10733, 1848, 4092, 1845, 515, 514, 1846, 1445, 8851, 92335, 814, 648152, 815, 10312, 816, 81…	2278	973	13528	2.008	2.08331e-37	4.25165e-39	8.66104e-38
GOTERM_BP_FAT	GO:0006793~phosphorus metabolic process	329	13.6401	4.59892e-41	6772, 8317, 6347, 27068, 156, 3480, 374291, 150, 4519, 151, 535, 6356, 533, 539, 4513, 4512, 4514, 57761, 6093, 5747, 2321, 2324, 207, 50617, 208, 3718, 3717, 4508, 29904, 4509, 10476, 545, 6776, 7204, 1457, 1459, 1453, 1452, 5618, 1432, 1455, 1454, 10087, 513, 728, 7040, 727, 5347, 7048, 1849, 7046, 516, 10733, 1848, 4092, 1845, 515, 514, 1846, 1445, 8851, 92335, 814, 648152, 815, 10312, 816, 81…	2278	973	13528	2.008	2.08331e-37	4.25165e-39	8.66104e-38
GOTERM_BP_FAT	GO:0031398~positive regulation of protein ubiquitination	71	2.94362	7.13331e-41	8881, 5682, 9861, 5686, 5685, 5684, 5683, 983, 9491, 10393, 64682, 51529, 5708, 5709, 672, 5706, 5707, 5691, 5704, 5690, 5705, 5693, 5702, 5692, 5700, 5695, 5701, 5694, 7311, 5696, 5687, 5688, 5689, 8454, 8312, 728590, 51434, 51433, 29882, 29945, 652826, 5717, 5718, 5719, 57154, 8697, 729948, 10273, 5710, 8945, 5711, 5713, 5714, 5715, 6500, 5716, 51343, 5347, 5699, 4092, 5698, 11065, 10213, 5720,…	2278	84	13528	5.01948	3.23139e-37	6.46278e-39	1.3434e-37
GOTERM_BP_FAT	GO:0051351~positive regulation of ligase activity	65	2.69486	2.71663e-40	8881, 5682, 9861, 5686, 5685, 5684, 5683, 983, 9491, 10393, 64682, 51529, 5708, 5709, 5706, 5707, 5691, 5704, 5690, 5705, 5693, 5702, 5692, 5700, 5695, 5701, 5694, 7311, 5696, 5687, 5688, 5689, 8454, 728590, 51434, 51433, 29882, 29945, 652826, 5717, 5718, 5719, 8697, 729948, 5710, 8945, 5711, 5713, 5714, 5715, 6500, 5716, 51343, 5347, 5699, 5698, 11065, 10213, 5720, 246184, 5721, 26271, 6233, 996…	2278	73	13528	5.28774	1.23063e-36	2.41301e-38	5.11617e-37
GOTERM_BP_FAT	GO:0051347~positive regulation of transferase activity	129	5.34826	6.50123e-39	10818, 55437, 2149, 3084, 335, 154, 150, 3481, 151, 6868, 8525, 7804, 885, 8877, 8526, 8527, 65057, 51422, 4035, 2321, 5170, 1902, 207, 1906, 3717, 1907, 1909, 1908, 7410, 920, 5618, 56034, 3845, 1128, 440577, 2785, 7189, 2771, 2069, 7040, 728, 727, 9162, 623, 109, 108, 107, 5562, 7048, 7046, 595, 2395, 92335, 5155, 93, 5566, 5567, 5568, 796, 1062, 994, 9170, 5571, 5573, 5576, 5575, 6385, 25913, …	2278	240	13528	3.19197	2.94506e-35	5.66357e-37	1.22436e-35
GOTERM_BP_FAT	GO:0031400~negative regulation of protein modification process	85	3.52405	8.6076e-39	8881, 440917, 5578, 5682, 9861, 5686, 5685, 5684, 5683, 9491, 10393, 64682, 701, 5582, 51529, 5580, 5708, 5709, 5706, 5707, 5691, 5704, 5690, 5705, 5693, 5702, 5692, 5700, 5695, 5701, 5694, 51160, 5696, 7311, 5687, 5688, 5689, 5590, 7248, 728590, 4221, 51434, 51433, 3643, 29882, 29945, 4085, 5717, 652826, 5718, 5719, 8697, 729948, 5664, 5710, 1029, 5711, 8651, 5713, 5714, 5715, 5716, 7040, 51343,…	2278	119	13528	4.24182	3.89924e-35	7.35706e-37	1.62105e-35
GOTERM_BP_FAT	GO:0033674~positive regulation of kinase activity	125	5.18242	4.15839e-38	10818, 55437, 2149, 3084, 154, 150, 3481, 151, 6868, 8525, 7804, 885, 8877, 8526, 8527, 51422, 4035, 2321, 5170, 1902, 207, 1906, 3717, 1907, 1909, 1908, 7410, 920, 5618, 56034, 3845, 1128, 440577, 2785, 7189, 2069, 2771, 7040, 728, 727, 9162, 623, 109, 108, 107, 5562, 7048, 7046, 595, 92335, 5155, 93, 5566, 5567, 5568, 796, 1062, 994, 9170, 5571, 5573, 5576, 5575, 6385, 894, 121512, 139189, 998,…	2278	231	13528	3.2135	1.88375e-34	3.48843e-36	7.83142e-35
GOTERM_BP_FAT	GO:0031401~positive regulation of protein modification process	110	4.56053	4.48306e-38	8881, 2147, 941, 3479, 9861, 64682, 3481, 6868, 253260, 885, 51422, 672, 3717, 1909, 64223, 8312, 728590, 51434, 4221, 51433, 1910, 920, 57154, 10273, 8945, 6500, 7040, 7424, 5347, 7046, 4092, 5699, 5698, 595, 92, 9759, 10213, 916, 26271, 996, 7321, 2280, 7324, 183, 991, 894, 891, 896, 5578, 5682, 5686, 5685, 10395, 5684, 983, 5683, 2475, 10393, 9491, 4254, 2247, 3630, 723961, 51529, 5708, 5709, …	2278	187	13528	3.49326	2.03082e-34	3.69241e-36	8.44285e-35
GOTERM_BP_FAT	GO:0055074~calcium ion homeostasis	110	4.56053	8.93483e-38	2147, 2149, 5733, 5021, 487, 6347, 2740, 6348, 5020, 488, 6352, 6869, 6356, 6354, 886, 2150, 5741, 887, 5745, 3710, 5030, 1901, 1902, 1903, 477, 5367, 4886, 1906, 3717, 348, 1907, 540, 1909, 1594, 6363, 2847, 1812, 1813, 1814, 1816, 56923, 7201, 1910, 2769, 10672, 2785, 7040, 728, 2837, 6375, 623, 5348, 10803, 729230, 624, 10800, 2833, 799, 797, 796, 491, 6387, 2826, 719, 2280, 9170, 2782, 2829, …	2278	188	13528	3.47468	4.04748e-34	7.22764e-36	1.68268e-34
GOTERM_BP_FAT	GO:0006874~cellular calcium ion homeostasis	108	4.47761	1.44401e-37	2147, 2149, 5733, 5021, 487, 6347, 2740, 6348, 5020, 488, 6352, 6869, 6356, 6354, 886, 2150, 5741, 887, 5745, 3710, 5030, 1901, 1902, 1903, 477, 5367, 4886, 1906, 3717, 348, 1907, 540, 1909, 6363, 2847, 1812, 1813, 1814, 1816, 56923, 7201, 1910, 2769, 10672, 2785, 7040, 728, 2837, 6375, 623, 5348, 10803, 729230, 624, 10800, 2833, 799, 797, 796, 491, 2826, 6387, 719, 2280, 9170, 2782, 2829, 185, 7…	2278	183	13528	3.50471	6.54135e-34	1.14761e-35	2.71947e-34
GOTERM_BP_FAT	GO:0055065~metal ion homeostasis	115	4.76783	4.56613e-37	2147, 2149, 5733, 5021, 487, 6347, 2740, 6348, 5020, 488, 6352, 6869, 6356, 6354, 886, 2150, 5741, 887, 5745, 3710, 5030, 1901, 1902, 1903, 477, 5367, 4886, 1906, 1585, 3717, 479, 348, 1907, 540, 1909, 1594, 6363, 2847, 1812, 1813, 1814, 1816, 56923, 7201, 1910, 2769, 10672, 2785, 7040, 728, 2837, 5348, 6375, 623, 10803, 23327, 729230, 624, 10800, 2833, 817, 799, 797, 796, 491, 6387, 2826, 2280, …	2278	205	13528	3.33138	2.06846e-33	3.56631e-35	8.5993e-34
GOTERM_BP_FAT	GO:0032270~positive regulation of cellular protein metabolic process	124	5.14096	7.82049e-37	8881, 2147, 941, 940, 3479, 9861, 64682, 3481, 6868, 253260, 885, 51422, 8399, 672, 4193, 207, 3717, 348, 1909, 64223, 8312, 728590, 4221, 51434, 51433, 4792, 1910, 920, 57154, 10273, 8945, 5045, 6500, 7040, 7424, 5347, 7046, 4092, 5699, 5698, 595, 92, 10213, 9759, 916, 26271, 996, 7321, 2280, 7324, 183, 185, 991, 894, 891, 7057, 896, 5578, 5682, 5686, 5685, 5684, 10395, 983, 5683, 2475, 10393, 9…	2278	233	13528	3.16043	3.54268e-33	6.00455e-35	1.47282e-33
GOTERM_BP_FAT	GO:0051247~positive regulation of protein metabolic process	127	5.26534	1.17653e-36	8881, 2147, 941, 940, 3479, 9861, 64682, 3481, 6868, 253260, 885, 51422, 8399, 672, 4193, 207, 3717, 348, 1909, 64223, 8312, 728590, 4221, 51434, 51433, 4792, 1910, 920, 57154, 10273, 8945, 5045, 6500, 7040, 7424, 5347, 7046, 4092, 5699, 5698, 595, 92, 10213, 9759, 324, 916, 26271, 996, 7321, 2280, 7324, 183, 185, 991, 894, 891, 83737, 7057, 896, 5578, 5682, 5686, 5685, 5684, 10395, 2475, 983, 56…	2278	243	13528	3.10368	5.32969e-33	8.88282e-35	2.21574e-33
GOTERM_BP_FAT	GO:0007167~enzyme linked receptor protein signaling pathway	157	6.50912	1.83862e-36	10818, 4303, 6774, 3084, 9241, 8928, 6347, 154, 3480, 3481, 6868, 1978, 8527, 6497, 8879, 5159, 5747, 1281, 375790, 9252, 2321, 9350, 2324, 1385, 1796, 207, 3718, 208, 3717, 409, 7074, 6777, 6776, 1278, 7204, 10817, 4690, 9365, 920, 26281, 57154, 5618, 2788, 10273, 56034, 53358, 25805, 2069, 7040, 7422, 4803, 7424, 4090, 8239, 8440, 7048, 624, 7046, 4093, 4092, 4091, 5154, 5155, 27006, 93, 5156, …	2278	342	13528	2.72617	8.32895e-33	1.3654e-34	3.46264e-33
GOTERM_BP_FAT	GO:0006754~ATP biosynthetic process	70	2.90216	1.84921e-36	148229, 23200, 487, 57205, 9551, 489, 10396, 488, 535, 482, 483, 480, 533, 481, 539, 538, 51422, 4514, 506, 509, 23120, 27032, 9914, 476, 9296, 478, 477, 50617, 23545, 479, 4508, 540, 4509, 9114, 10476, 79895, 51761, 374868, 51606, 90423, 513, 5205, 7040, 10632, 245972, 57198, 8992, 245973, 57194, 516, 515, 23250, 514, 10312, 51382, 496, 495, 10079, 498, 491, 522, 521, 492, 493, 523, 490, 529, 52…	2278	89	13528	4.67076	8.37692e-33	1.35112e-34	3.48258e-33
GOTERM_BP_FAT	GO:0006875~cellular metal ion homeostasis	111	4.60199	2.65494e-36	2147, 2149, 5733, 5021, 487, 6347, 2740, 6348, 5020, 488, 6352, 6869, 6356, 6354, 886, 2150, 5741, 887, 5745, 3710, 5030, 1901, 1902, 1903, 477, 5367, 4886, 1906, 3717, 348, 1907, 540, 1909, 6363, 2847, 1812, 1813, 1814, 1816, 56923, 7201, 1910, 2769, 10672, 2785, 7040, 728, 2837, 6375, 623, 5348, 10803, 23327, 729230, 624, 10800, 2833, 817, 799, 797, 796, 491, 6387, 2826, 2280, 719, 9170, 2782, …	2278	196	13528	3.36315	1.20269e-32	1.90903e-34	4.99999e-33
GOTERM_BP_FAT	GO:0045860~positive regulation of protein kinase activity	120	4.97512	2.83392e-36	10818, 55437, 2149, 3084, 154, 150, 3481, 151, 6868, 8525, 7804, 885, 8877, 8526, 8527, 51422, 4035, 2321, 5170, 1902, 207, 1906, 3717, 1907, 1909, 1908, 920, 5618, 56034, 3845, 1128, 440577, 2785, 7189, 2069, 2771, 7040, 728, 727, 9162, 623, 109, 108, 107, 5562, 7048, 7046, 595, 92335, 5155, 93, 5566, 5567, 5568, 796, 1062, 994, 9170, 5571, 5573, 5576, 5575, 6385, 894, 121512, 139189, 7057, 896,…	2278	223	13528	3.19563	1.28376e-32	2.00588e-34	5.33706e-33
GOTERM_BP_FAT	GO:0000280~nuclear division	119	4.93367	2.89941e-36	8881, 332, 10403, 54908, 10540, 64682, 4926, 79003, 7280, 9918, 79980, 9735, 11339, 11004, 25836, 54820, 54821, 51434, 55055, 23122, 51433, 10726, 55920, 8243, 11130, 79023, 347733, 23397, 113130, 5048, 22919, 7329, 348235, 1069, 10274, 5347, 8239, 54069, 10735, 8379, 890, 699, 10592, 80254, 324, 26271, 1062, 151648, 9232, 9183, 996, 57405, 994, 9181, 995, 1639, 83540, 993, 990, 991, 9184, 23383,…	2278	220	13528	3.21221	1.31343e-32	2.02067e-34	5.4604e-33
GOTERM_BP_FAT	GO:0007067~mitosis	119	4.93367	2.89941e-36	8881, 332, 10403, 54908, 10540, 64682, 4926, 79003, 7280, 9918, 79980, 9735, 11339, 11004, 25836, 54820, 54821, 51434, 55055, 23122, 51433, 10726, 55920, 8243, 11130, 79023, 347733, 23397, 113130, 5048, 22919, 7329, 348235, 1069, 10274, 5347, 8239, 54069, 10735, 8379, 890, 699, 10592, 80254, 324, 26271, 1062, 151648, 9232, 9183, 996, 57405, 994, 9181, 995, 1639, 83540, 993, 990, 991, 9184, 23383,…	2278	220	13528	3.21221	1.31343e-32	2.02067e-34	5.4604e-33
GOTERM_BP_FAT	GO:0000087~M phase of mitotic cell cycle	119	4.93367	2.9356e-35	8881, 332, 10403, 54908, 10540, 64682, 4926, 79003, 7280, 9918, 79980, 9735, 11339, 11004, 25836, 54820, 54821, 51434, 55055, 23122, 51433, 10726, 55920, 8243, 11130, 79023, 347733, 23397, 113130, 5048, 22919, 7329, 348235, 1069, 10274, 5347, 8239, 54069, 10735, 8379, 890, 699, 10592, 80254, 324, 26271, 1062, 151648, 9232, 9183, 996, 57405, 994, 9181, 995, 1639, 83540, 993, 990, 991, 9184, 23383,…	2278	224	13528	3.15485	1.32983e-31	2.01489e-33	5.52855e-32
GOTERM_BP_FAT	GO:0007204~elevation of cytosolic calcium ion concentration	78	3.23383	3.01318e-35	2147, 2149, 60675, 5733, 11255, 5021, 3827, 2740, 5020, 6869, 7852, 886, 2150, 887, 56477, 5745, 3710, 5030, 1901, 1902, 1903, 5367, 1906, 3717, 1907, 1232, 1909, 1233, 1234, 1235, 1236, 1237, 2847, 1812, 1813, 56923, 7201, 1910, 133, 8698, 2769, 10672, 1230, 1604, 2785, 10563, 4987, 728, 2837, 2696, 8811, 623, 10803, 729230, 624, 552, 10800, 553, 2833, 551, 799, 23566, 796, 2691, 51738, 2826, 71…	2278	110	13528	4.21097	1.36497e-31	2.03727e-33	5.67467e-32
GOTERM_BP_FAT	GO:0051480~cytosolic calcium ion homeostasis	81	3.35821	5.38762e-35	2147, 2149, 60675, 5733, 11255, 5021, 3827, 2740, 5020, 6869, 7852, 886, 2150, 887, 56477, 5745, 3710, 5030, 8065, 1901, 1902, 1903, 477, 5367, 4886, 1906, 3717, 1907, 1232, 1909, 1233, 1234, 1235, 1236, 1237, 2847, 1812, 1813, 56923, 7201, 1910, 133, 8698, 2769, 10672, 1230, 1604, 2785, 10563, 4987, 728, 2837, 2696, 8811, 623, 10803, 729230, 624, 552, 10800, 553, 2833, 551, 799, 23566, 796, 2691…	2278	118	13528	4.07646	2.44059e-31	3.5891e-33	1.01464e-31
GOTERM_BP_FAT	GO:0009719~response to endogenous stimulus	172	7.13101	1.17764e-34	5950, 4303, 6774, 2642, 682, 2641, 6772, 5021, 6347, 59345, 2099, 5020, 336, 6870, 51083, 3726, 3480, 6352, 3481, 6869, 6868, 1583, 1978, 4314, 552891, 672, 5170, 1081, 207, 4886, 208, 3717, 1594, 3351, 2, 6696, 51764, 1277, 6777, 1812, 1813, 6776, 7200, 1814, 1816, 10726, 6750, 5140, 5970, 2788, 2787, 3845, 8651, 2784, 2783, 2786, 2785, 10014, 2790, 2791, 3949, 7040, 109, 4803, 108, 54331, 10013…	2278	405	13528	2.52205	5.33472e-31	7.73148e-33	2.21783e-31
GOTERM_BP_FAT	GO:0045333~cellular respiration	72	2.98507	1.20306e-34	4698, 4697, 5162, 374291, 4519, 6392, 6390, 6391, 4513, 4512, 4514, 4191, 6507, 4508, 7381, 4509, 4695, 4696, 7388, 4694, 7385, 7384, 3420, 4709, 4707, 1743, 23530, 4708, 1431, 4705, 4706, 4704, 4541, 4701, 4540, 283398, 4702, 10975, 4700, 4731, 4538, 4539, 4536, 2271, 727947, 4537, 4535, 3419, 3418, 1544, 2395, 4716, 4728, 4717, 4718, 4719, 4729, 4712, 1738, 4724, 4723, 4713, 4714, 4726, 4715, 4…	2278	97	13528	4.40799	5.44984e-31	7.78549e-33	2.26569e-31
GOTERM_BP_FAT	GO:0048015~phosphoinositide-mediated signaling	68	2.81924	1.43537e-34	2915, 2149, 4852, 5733, 7298, 10403, 3479, 3480, 6869, 8360, 8362, 5984, 8361, 9002, 8364, 8363, 701, 3579, 8366, 886, 8365, 887, 8368, 8367, 4829, 4159, 2064, 5745, 5030, 1901, 5031, 5032, 1906, 1241, 1907, 1909, 5028, 1908, 5029, 51764, 8294, 1812, 1813, 8359, 1816, 56923, 1910, 11130, 2769, 2767, 1128, 1129, 6790, 3356, 3358, 3357, 121504, 5289, 5111, 554313, 11065, 8370, 2776, 23620, 10316, 2…	2278	88	13528	4.58887	6.50224e-31	9.15808e-33	2.70321e-31
GOTERM_BP_FAT	GO:0010518~positive regulation of phospholipase activity	59	2.4461	1.78391e-34	5330, 2915, 2149, 5733, 6869, 9002, 886, 3579, 887, 4829, 4159, 5745, 5030, 1901, 5031, 5032, 1902, 344, 1906, 1241, 1909, 5028, 5029, 5590, 51764, 1812, 1813, 1816, 56923, 5319, 1910, 8698, 1956, 2769, 2767, 10672, 1128, 1129, 3356, 728, 3358, 3357, 552, 553, 395, 2776, 23620, 10316, 23566, 796, 3973, 9170, 3060, 2782, 183, 185, 3062, 3269, 51289	2278	69	13528	5.07788	8.08109e-31	1.12237e-32	3.35959e-31
GOTERM_BP_FAT	GO:0032870~cellular response to hormone stimulus	86	3.56551	3.60807e-34	114, 6121, 4303, 115, 6774, 5781, 112, 2642, 113, 2641, 6772, 6464, 5577, 111, 59345, 3726, 3480, 8835, 3481, 1978, 5584, 3630, 723961, 94235, 2065, 552891, 26524, 5170, 1081, 196883, 207, 208, 3717, 548645, 6198, 2887, 9113, 2885, 51764, 1812, 6777, 7200, 6776, 3643, 5319, 5140, 2788, 2787, 2931, 2784, 2783, 2786, 2785, 10014, 2790, 2791, 109, 108, 54331, 107, 55970, 3673, 8503, 8850, 2308, 9734…	2278	133	13528	3.83996	1.63445e-30	2.23898e-32	6.795e-31
GOTERM_BP_FAT	GO:0048285~organelle fission	119	4.93367	4.74526e-34	8881, 332, 10403, 54908, 10540, 64682, 4926, 79003, 7280, 9918, 79980, 9735, 11339, 11004, 25836, 54820, 54821, 51434, 55055, 23122, 51433, 10726, 55920, 8243, 11130, 79023, 347733, 23397, 113130, 5048, 22919, 7329, 348235, 1069, 10274, 5347, 8239, 54069, 10735, 8379, 890, 699, 10592, 80254, 324, 26271, 1062, 151648, 9232, 9183, 996, 57405, 994, 9181, 995, 1639, 83540, 993, 990, 991, 9184, 23383,…	2278	229	13528	3.08597	2.1496e-30	2.90487e-32	8.93665e-31
GOTERM_BP_FAT	GO:0046034~ATP metabolic process	74	3.06799	3.62669e-33	148229, 23200, 487, 57205, 9551, 489, 10396, 488, 535, 482, 483, 480, 533, 481, 539, 538, 51422, 4514, 4650, 506, 509, 23120, 27032, 9914, 476, 9296, 478, 477, 50617, 23545, 479, 4508, 540, 4509, 9114, 10476, 79895, 51761, 374868, 2071, 51606, 90423, 513, 5205, 7040, 10632, 245972, 57198, 8992, 245973, 57194, 516, 515, 23250, 514, 9525, 10312, 4719, 51382, 496, 495, 10079, 498, 491, 522, 521, 492…	2278	105	13528	4.18526	1.64289e-29	2.19052e-31	6.83008e-30
GOTERM_BP_FAT	GO:0010517~regulation of phospholipase activity	59	2.4461	3.96373e-33	5330, 2915, 2149, 5733, 6869, 9002, 886, 3579, 887, 4829, 4159, 5745, 5030, 1901, 5031, 5032, 1902, 344, 1906, 1241, 1909, 5028, 5029, 5590, 51764, 1812, 1813, 1816, 56923, 5319, 1910, 8698, 1956, 2769, 2767, 10672, 1128, 1129, 3356, 728, 3358, 3357, 552, 553, 395, 2776, 23620, 10316, 23566, 796, 3973, 9170, 3060, 2782, 183, 185, 3062, 3269, 51289	2278	71	13528	4.93485	1.79557e-29	2.36259e-31	7.46482e-30
GOTERM_BP_FAT	GO:0006091~generation of precursor metabolites and energy	143	5.92869	6.0605e-33	4698, 4697, 2642, 5162, 5160, 155, 374291, 4519, 535, 533, 4513, 539, 4512, 51422, 5443, 4514, 4191, 1327, 50617, 207, 4508, 4509, 10476, 2847, 4695, 4696, 4694, 9365, 54539, 3420, 23530, 1431, 27089, 51606, 513, 2271, 3419, 3418, 245972, 245973, 516, 3945, 515, 514, 2395, 10312, 2778, 51382, 112812, 440567, 498, 522, 521, 54205, 6389, 523, 3939, 529, 526, 525, 3421, 528, 527, 1351, 1350, 2110, 2…	2278	313	13528	2.71314	2.74541e-29	3.56546e-31	1.14136e-29
GOTERM_BP_FAT	GO:0032268~regulation of cellular protein metabolic process	187	7.7529	1.33196e-32	192669, 8881, 2147, 941, 440917, 940, 3479, 9861, 335, 3481, 64682, 6868, 1975, 1977, 1978, 885, 253260, 51422, 5159, 8399, 672, 23645, 3690, 4193, 207, 1906, 51160, 348, 3717, 1909, 3685, 2, 64223, 1981, 3689, 8312, 27327, 728590, 4221, 51434, 51433, 4790, 4792, 4690, 920, 1910, 57154, 10273, 56034, 8945, 5045, 8651, 6500, 7040, 623, 7424, 57690, 5347, 10013, 8440, 9021, 624, 7046, 4092, 23112, …	2278	474	13528	2.34284	6.0338e-29	7.73564e-31	2.50846e-29
GOTERM_BP_FAT	GO:0042330~taxis	94	3.89718	1.63185e-32	154796, 3627, 2919, 60675, 5578, 7249, 6349, 10850, 6347, 6348, 3684, 79902, 6352, 6351, 1524, 6356, 2247, 6354, 7852, 414062, 3579, 11251, 3577, 56477, 5159, 3576, 5880, 5604, 1907, 1232, 1233, 1908, 6361, 1234, 10371, 6364, 1235, 6363, 2255, 1236, 8828, 6366, 1237, 3689, 1238, 6367, 58191, 5879, 55558, 6360, 5594, 5319, 51554, 1910, 3265, 2359, 2358, 2357, 1432, 1230, 6846, 10563, 728, 727, 637…	2278	160	13528	3.48889	7.39228e-29	9.35732e-31	3.07323e-29
GOTERM_BP_FAT	GO:0006935~chemotaxis	94	3.89718	1.63185e-32	154796, 3627, 2919, 60675, 5578, 7249, 6349, 10850, 6347, 6348, 3684, 79902, 6352, 6351, 1524, 6356, 2247, 6354, 7852, 414062, 3579, 11251, 3577, 56477, 5159, 3576, 5880, 5604, 1907, 1232, 1233, 1908, 6361, 1234, 10371, 6364, 1235, 6363, 2255, 1236, 8828, 6366, 1237, 3689, 1238, 6367, 58191, 5879, 55558, 6360, 5594, 5319, 51554, 1910, 3265, 2359, 2358, 2357, 1432, 1230, 6846, 10563, 728, 727, 637…	2278	160	13528	3.48889	7.39228e-29	9.35732e-31	3.07323e-29
GOTERM_BP_FAT	GO:0051248~negative regulation of protein metabolic process	103	4.27032	2.57476e-32	192669, 8881, 440917, 9861, 64682, 3481, 1978, 3690, 51160, 2, 3685, 27327, 728590, 51434, 4221, 51433, 4790, 5970, 5045, 8651, 7040, 623, 10013, 624, 5699, 4092, 5698, 4091, 7529, 10213, 26277, 192670, 26271, 996, 7321, 2280, 7324, 991, 9184, 7531, 7057, 27161, 5578, 5682, 5686, 5685, 5684, 5683, 10393, 9491, 701, 3630, 723961, 5582, 51529, 5580, 2903, 2905, 5708, 5709, 5706, 26523, 5707, 5691, …	2278	187	13528	3.27096	1.16637e-28	1.45796e-30	4.84899e-29
GOTERM_BP_FAT	GO:0009206~purine ribonucleoside triphosphate biosynthetic process	70	2.90216	5.77406e-32	148229, 23200, 487, 57205, 9551, 489, 10396, 488, 535, 482, 483, 480, 533, 481, 539, 538, 51422, 4514, 506, 509, 23120, 27032, 9914, 476, 9296, 478, 477, 50617, 23545, 479, 4508, 540, 4509, 9114, 10476, 79895, 51761, 374868, 51606, 90423, 513, 5205, 7040, 10632, 245972, 57198, 8992, 245973, 57194, 516, 515, 23250, 514, 10312, 51382, 496, 495, 10079, 498, 491, 522, 521, 492, 493, 523, 490, 529, 52…	2278	98	13528	4.24182	2.61565e-28	3.2292e-30	1.08742e-28
GOTERM_BP_FAT	GO:0000279~M phase	146	6.05307	6.27802e-32	8881, 332, 10403, 54908, 10540, 64682, 4926, 79003, 7280, 7283, 27127, 9918, 79980, 9735, 11004, 11339, 25836, 54820, 472, 54821, 55055, 51434, 23122, 51433, 10726, 55920, 8243, 11130, 79023, 9985, 347733, 23397, 113130, 5048, 25777, 7329, 22919, 348235, 2069, 109, 1069, 10274, 5347, 8239, 10734, 54069, 10735, 8379, 81027, 890, 699, 10592, 1111, 80254, 324, 3014, 1062, 26271, 151648, 1778, 9232, …	2278	329	13528	2.63534	2.84395e-28	3.46823e-30	1.18233e-28
GOTERM_BP_FAT	GO:0032269~negative regulation of cellular protein metabolic process	100	4.14594	8.47966e-32	192669, 8881, 440917, 9861, 64682, 3481, 1978, 3690, 51160, 2, 3685, 27327, 728590, 51434, 4221, 51433, 4790, 5045, 8651, 7040, 623, 10013, 624, 5699, 4092, 5698, 4091, 7529, 10213, 26277, 192670, 26271, 996, 7321, 2280, 7324, 991, 9184, 7531, 7057, 27161, 5578, 5682, 5686, 5685, 5684, 5683, 9491, 10393, 701, 3630, 723961, 5582, 51529, 5580, 5708, 5709, 5706, 26523, 5707, 5691, 5704, 5705, 5690, …	2278	180	13528	3.29919	3.84129e-28	4.62806e-30	1.59696e-28
GOTERM_BP_FAT	GO:0007202~activation of phospholipase C activity	55	2.28027	1.18042e-31	2915, 5330, 2149, 5733, 6869, 9002, 886, 3579, 887, 4829, 4159, 5745, 5030, 5031, 1901, 5032, 1902, 1906, 1241, 1909, 5028, 5029, 51764, 1812, 1813, 1816, 56923, 1910, 8698, 1956, 2769, 2767, 1128, 1129, 3356, 728, 3358, 3357, 552, 553, 395, 2776, 23620, 10316, 23566, 796, 3973, 9170, 3060, 2782, 183, 185, 3062, 3269, 51289	2278	65	13528	5.02492	5.34731e-28	6.36585e-30	2.22307e-28
GOTERM_BP_FAT	GO:0010863~positive regulation of phospholipase C activity	55	2.28027	1.18042e-31	2915, 5330, 2149, 5733, 6869, 9002, 886, 3579, 887, 4829, 4159, 5745, 5030, 5031, 1901, 5032, 1902, 1906, 1241, 1909, 5028, 5029, 51764, 1812, 1813, 1816, 56923, 1910, 8698, 1956, 2769, 2767, 1128, 1129, 3356, 728, 3358, 3357, 552, 553, 395, 2776, 23620, 10316, 23566, 796, 3973, 9170, 3060, 2782, 183, 185, 3062, 3269, 51289	2278	65	13528	5.02492	5.34731e-28	6.36585e-30	2.22307e-28
GOTERM_BP_FAT	GO:0009145~purine nucleoside triphosphate biosynthetic process	70	2.90216	1.59217e-31	148229, 23200, 487, 57205, 9551, 489, 10396, 488, 535, 482, 483, 480, 533, 481, 539, 538, 51422, 4514, 506, 509, 23120, 27032, 9914, 476, 9296, 478, 477, 50617, 23545, 479, 4508, 540, 4509, 9114, 10476, 79895, 51761, 374868, 51606, 90423, 513, 5205, 7040, 10632, 245972, 57198, 8992, 245973, 57194, 516, 515, 23250, 514, 10312, 51382, 496, 495, 10079, 498, 491, 522, 521, 492, 493, 523, 490, 529, 52…	2278	99	13528	4.19897	7.21254e-28	8.48534e-30	2.9985e-28
GOTERM_BP_FAT	GO:0009201~ribonucleoside triphosphate biosynthetic process	70	2.90216	1.59217e-31	148229, 23200, 487, 57205, 9551, 489, 10396, 488, 535, 482, 483, 480, 533, 481, 539, 538, 51422, 4514, 506, 509, 23120, 27032, 9914, 476, 9296, 478, 477, 50617, 23545, 479, 4508, 540, 4509, 9114, 10476, 79895, 51761, 374868, 51606, 90423, 513, 5205, 7040, 10632, 245972, 57198, 8992, 245973, 57194, 516, 515, 23250, 514, 10312, 51382, 496, 495, 10079, 498, 491, 522, 521, 492, 493, 523, 490, 529, 52…	2278	99	13528	4.19897	7.21254e-28	8.48534e-30	2.9985e-28
GOTERM_BP_FAT	GO:0009725~response to hormone stimulus	155	6.4262	6.43838e-31	5950, 4303, 6774, 2642, 682, 2641, 6772, 5021, 6347, 59345, 2099, 5020, 336, 6870, 51083, 3726, 3480, 6352, 3481, 6869, 1583, 1978, 552891, 672, 5170, 1081, 207, 4886, 208, 3717, 3351, 2, 1594, 6696, 51764, 1812, 6777, 1277, 6776, 7200, 10726, 6750, 5140, 5970, 2788, 2787, 3845, 8651, 2784, 2783, 2786, 2785, 10014, 2790, 2791, 3949, 7040, 109, 4803, 108, 54331, 107, 9021, 7048, 7046, 595, 5154, 5…	2278	367	13528	2.5081	2.91658e-27	3.39138e-29	1.21253e-27
GOTERM_BP_FAT	GO:0060193~positive regulation of lipase activity	59	2.4461	9.8444e-31	5330, 2915, 2149, 5733, 6869, 9002, 886, 3579, 887, 4829, 4159, 5745, 5030, 1901, 5031, 5032, 1902, 344, 1906, 1241, 1909, 5028, 5029, 5590, 51764, 1812, 1813, 1816, 56923, 5319, 1910, 8698, 1956, 2769, 2767, 10672, 1128, 1129, 3356, 728, 3358, 3357, 552, 553, 395, 2776, 23620, 10316, 23566, 796, 3973, 9170, 3060, 2782, 183, 185, 3062, 3269, 51289	2278	75	13528	4.67165	4.45951e-27	5.12588e-29	1.85398e-27
GOTERM_BP_FAT	GO:0060191~regulation of lipase activity	64	2.6534	1.96225e-30	5330, 2915, 2149, 5733, 336, 6869, 9002, 3579, 886, 887, 4829, 4159, 5745, 5030, 1901, 5031, 5032, 1902, 344, 345, 1906, 3717, 1241, 1909, 5028, 5029, 5590, 51764, 1812, 1813, 1816, 56923, 5319, 1910, 8698, 1956, 2769, 2767, 10672, 1128, 1129, 3356, 728, 3358, 3357, 552, 553, 395, 2776, 23620, 10316, 23566, 796, 2280, 3973, 9170, 3060, 2782, 183, 185, 186, 3062, 3269, 51289	2278	87	13528	4.36858	8.88899e-27	1.01011e-28	3.69546e-27
GOTERM_BP_FAT	GO:0042127~regulation of cell proliferation	260	10.7794	2.31959e-30	941, 5732, 942, 3280, 6772, 3084, 940, 29126, 8317, 6349, 3479, 6347, 10203, 51083, 154, 3480, 4615, 150, 6869, 3481, 6868, 8877, 6497, 3714, 5745, 5744, 2321, 3091, 4889, 3852, 2324, 348, 3717, 1594, 6608, 4893, 3915, 4221, 51761, 6777, 1813, 6776, 1814, 6778, 3912, 4792, 4609, 6752, 6753, 6750, 6751, 3845, 5617, 7040, 2837, 6374, 8440, 7048, 624, 7046, 1445, 5241, 10312, 2308, 8850, 817, 324, 9…	2278	787	13528	1.96191	1.05077e-26	1.18064e-28	4.36843e-27
GOTERM_BP_FAT	GO:0007190~activation of adenylate cyclase activity	49	2.03151	2.70102e-30	116, 117, 114, 115, 112, 113, 2642, 111, 2740, 1394, 10203, 155, 154, 7253, 153, 5741, 5745, 5744, 5032, 196883, 122042, 1909, 1812, 1814, 1816, 135, 8698, 136, 3363, 2696, 4988, 8811, 109, 108, 107, 554, 799, 2776, 2778, 796, 2692, 2691, 2774, 2492, 3973, 2587, 4915, 140, 4914	2278	55	13528	5.2907	1.22356e-26	1.35951e-28	5.08677e-27
GOTERM_BP_FAT	GO:0009142~nucleoside triphosphate biosynthetic process	70	2.90216	2.92301e-30	148229, 23200, 487, 57205, 9551, 489, 10396, 488, 535, 482, 483, 480, 533, 481, 539, 538, 51422, 4514, 506, 509, 23120, 27032, 9914, 476, 9296, 478, 477, 50617, 23545, 479, 4508, 540, 4509, 9114, 10476, 79895, 51761, 374868, 51606, 90423, 513, 5205, 7040, 10632, 245972, 57198, 8992, 245973, 57194, 516, 515, 23250, 514, 10312, 51382, 496, 495, 10079, 498, 491, 522, 521, 492, 493, 523, 490, 529, 52…	2278	102	13528	4.07547	1.32412e-26	1.45508e-28	5.50485e-27
GOTERM_BP_FAT	GO:0008284~positive regulation of cell proliferation	166	6.88226	6.45492e-30	941, 2149, 284217, 942, 6772, 3280, 3084, 685, 940, 9241, 8317, 80380, 3479, 6347, 9340, 10203, 154, 3480, 3481, 6869, 150, 6868, 8877, 887, 5159, 5745, 5744, 2321, 3091, 4889, 1901, 4193, 2324, 1903, 1906, 1907, 3717, 1908, 7412, 3688, 6608, 4893, 3350, 3915, 6777, 1813, 6776, 1814, 3912, 4609, 4690, 5970, 56034, 3845, 5617, 1128, 440577, 57804, 2771, 2069, 7040, 2837, 7422, 6374, 4803, 7424, 74…	2278	414	13528	2.38115	2.92408e-26	3.17835e-28	1.21564e-26
GOTERM_BP_FAT	GO:0042775~mitochondrial ATP synthesis coupled electron transport	49	2.03151	1.57791e-29	4698, 4697, 374291, 4519, 4513, 4512, 4514, 4508, 7381, 4509, 4695, 4696, 7388, 4694, 7384, 4709, 4707, 4708, 4705, 4706, 4704, 4541, 4540, 4701, 4702, 10975, 4700, 4731, 4538, 4539, 727947, 4536, 4537, 4535, 4716, 4728, 4717, 4718, 4719, 4729, 1738, 4724, 4712, 4723, 4713, 4714, 4726, 4725, 4715, 440567, 4720, 4722, 4710, 4711	2278	56	13528	5.19622	7.14793e-26	7.68595e-28	2.97164e-26
GOTERM_BP_FAT	GO:0042773~ATP synthesis coupled electron transport	49	2.03151	1.57791e-29	4698, 4697, 374291, 4519, 4513, 4512, 4514, 4508, 7381, 4509, 4695, 4696, 7388, 4694, 7384, 4709, 4707, 4708, 4705, 4706, 4704, 4541, 4540, 4701, 4702, 10975, 4700, 4731, 4538, 4539, 727947, 4536, 4537, 4535, 4716, 4728, 4717, 4718, 4719, 4729, 1738, 4724, 4712, 4723, 4713, 4714, 4726, 4725, 4715, 440567, 4720, 4722, 4710, 4711	2278	56	13528	5.19622	7.14793e-26	7.68595e-28	2.97164e-26
GOTERM_BP_FAT	GO:0045762~positive regulation of adenylate cyclase activity	49	2.03151	1.57791e-29	116, 117, 114, 115, 112, 113, 2642, 111, 2740, 1394, 10203, 155, 154, 7253, 153, 5741, 5745, 5744, 5032, 196883, 122042, 1909, 1812, 1814, 1816, 135, 8698, 136, 3363, 2696, 4988, 8811, 109, 108, 107, 554, 799, 2776, 2778, 796, 2692, 2691, 2774, 2492, 3973, 2587, 4915, 140, 4914	2278	56	13528	5.19622	7.14793e-26	7.68595e-28	2.97164e-26
GOTERM_BP_FAT	GO:0009205~purine ribonucleoside triphosphate metabolic process	75	3.10945	1.78904e-29	148229, 23200, 487, 57205, 9551, 489, 10396, 488, 535, 482, 483, 480, 533, 481, 539, 538, 51422, 4514, 4650, 506, 509, 23120, 27032, 9914, 476, 9296, 478, 477, 50617, 23545, 479, 4508, 540, 4509, 9114, 10476, 79895, 51761, 374868, 2071, 51606, 90423, 513, 5205, 7040, 10632, 245972, 57198, 8992, 245973, 57194, 516, 515, 23250, 514, 9525, 10312, 4719, 51382, 496, 495, 10079, 498, 491, 522, 521, 492…	2278	117	13528	3.80676	8.10437e-26	8.62167e-28	3.36927e-26
GOTERM_BP_FAT	GO:0007169~transmembrane receptor protein tyrosine kinase signaling pathway	111	4.60199	1.93014e-29	10818, 4303, 6774, 3084, 6347, 154, 3480, 3481, 6868, 1978, 8527, 8879, 5159, 5747, 375790, 9252, 2321, 2324, 1796, 207, 208, 3717, 7074, 6777, 6776, 10817, 4690, 9365, 26281, 920, 5618, 56034, 53358, 2069, 7040, 7422, 4803, 7424, 8440, 624, 5154, 27006, 5155, 5156, 2308, 9564, 916, 2277, 8660, 10603, 23433, 5770, 1839, 116, 117, 6121, 5781, 5894, 6464, 2254, 7249, 2253, 2252, 2251, 2250, 2248, 8…	2278	224	13528	2.94276	8.74355e-26	9.20373e-28	3.635e-26
GOTERM_BP_FAT	GO:0010498~proteasomal protein catabolic process	69	2.8607	3.01245e-29	8881, 5682, 9861, 5686, 5685, 5684, 5683, 983, 9491, 10393, 64682, 5887, 701, 51529, 5708, 5709, 5706, 79718, 5707, 5691, 5704, 5690, 5705, 5693, 5702, 5692, 5700, 5695, 5701, 5694, 7311, 5696, 5687, 5688, 5689, 728590, 51434, 51433, 29882, 4085, 29945, 652826, 5717, 5718, 5719, 57154, 8697, 729948, 10273, 5710, 5711, 5713, 5714, 5715, 5716, 5516, 6907, 5699, 5698, 11065, 10213, 5720, 246184, 572…	2278	102	13528	4.01725	1.36464e-25	1.4215e-27	5.67329e-26
GOTERM_BP_FAT	GO:0043161~proteasomal ubiquitin-dependent protein catabolic process	69	2.8607	3.01245e-29	8881, 5682, 9861, 5686, 5685, 5684, 5683, 983, 9491, 10393, 64682, 5887, 701, 51529, 5708, 5709, 5706, 79718, 5707, 5691, 5704, 5690, 5705, 5693, 5702, 5692, 5700, 5695, 5701, 5694, 7311, 5696, 5687, 5688, 5689, 728590, 51434, 51433, 29882, 4085, 29945, 652826, 5717, 5718, 5719, 57154, 8697, 729948, 10273, 5710, 5711, 5713, 5714, 5715, 5716, 5516, 6907, 5699, 5698, 11065, 10213, 5720, 246184, 572…	2278	102	13528	4.01725	1.36464e-25	1.4215e-27	5.67329e-26
GOTERM_BP_FAT	GO:0009199~ribonucleoside triphosphate metabolic process	75	3.10945	4.00975e-29	148229, 23200, 487, 57205, 9551, 489, 10396, 488, 535, 482, 483, 480, 533, 481, 539, 538, 51422, 4514, 4650, 506, 509, 23120, 27032, 9914, 476, 9296, 478, 477, 50617, 23545, 479, 4508, 540, 4509, 9114, 10476, 79895, 51761, 374868, 2071, 51606, 90423, 513, 5205, 7040, 10632, 245972, 57198, 8992, 245973, 57194, 516, 515, 23250, 514, 9525, 10312, 4719, 51382, 496, 495, 10079, 498, 491, 522, 521, 492…	2278	118	13528	3.7745	1.81642e-25	1.8726e-27	7.55148e-26
GOTERM_BP_FAT	GO:0006120~mitochondrial electron transport, NADH to ubiquinone	41	1.69983	4.98986e-29	4709, 4707, 4698, 4708, 4697, 4705, 4706, 4541, 4704, 4701, 4540, 4702, 4700, 4731, 4538, 4539, 374291, 4536, 4537, 4535, 4728, 4716, 4717, 4718, 4719, 4729, 4712, 4724, 1738, 4723, 4713, 4714, 4726, 4715, 4725, 4720, 4722, 4710, 4711, 4695, 4696, 4694	2278	42	13528	5.79715	2.26041e-25	2.30654e-27	9.3973e-26
GOTERM_BP_FAT	GO:0051349~positive regulation of lyase activity	50	2.07297	8.04331e-29	116, 117, 114, 115, 112, 113, 2642, 111, 2740, 1394, 10203, 155, 154, 7253, 153, 5741, 5745, 5744, 5032, 196883, 122042, 1909, 1812, 1814, 1816, 135, 8698, 136, 3363, 2696, 4988, 8811, 109, 108, 107, 554, 2395, 799, 2776, 2778, 796, 2692, 2691, 2774, 3973, 2492, 2587, 4915, 140, 4914	2278	59	13528	5.03266	3.64362e-25	3.68042e-27	1.51478e-25
GOTERM_BP_FAT	GO:0007194~negative regulation of adenylate cyclase activity	48	1.99005	8.17137e-29	2914, 114, 2912, 115, 2913, 2918, 112, 113, 2916, 111, 2917, 11255, 150, 378708, 11251, 1133, 1325, 1901, 1903, 196883, 122042, 4886, 4887, 2847, 3350, 1813, 1814, 6752, 134, 1910, 2770, 8484, 2771, 4987, 4988, 4985, 109, 4986, 108, 56413, 107, 729230, 2550, 2773, 9568, 2774, 2781, 2587, 6755	2278	55	13528	5.18273	3.70163e-25	3.70163e-27	1.5389e-25
GOTERM_BP_FAT	GO:0031280~negative regulation of cyclase activity	48	1.99005	8.17137e-29	2914, 114, 2912, 115, 2913, 2918, 112, 113, 2916, 111, 2917, 11255, 150, 378708, 11251, 1133, 1325, 1901, 1903, 196883, 122042, 4886, 4887, 2847, 3350, 1813, 1814, 6752, 134, 1910, 2770, 8484, 2771, 4987, 4988, 4985, 109, 4986, 108, 56413, 107, 729230, 2550, 2773, 9568, 2774, 2781, 2587, 6755	2278	55	13528	5.18273	3.70163e-25	3.70163e-27	1.5389e-25
GOTERM_BP_FAT	GO:0051350~negative regulation of lyase activity	48	1.99005	8.17137e-29	2914, 114, 2912, 115, 2913, 2918, 112, 113, 2916, 111, 2917, 11255, 150, 378708, 11251, 1133, 1325, 1901, 1903, 196883, 122042, 4886, 4887, 2847, 3350, 1813, 1814, 6752, 134, 1910, 2770, 8484, 2771, 4987, 4988, 4985, 109, 4986, 108, 56413, 107, 729230, 2550, 2773, 9568, 2774, 2781, 2587, 6755	2278	55	13528	5.18273	3.70163e-25	3.70163e-27	1.5389e-25
GOTERM_BP_FAT	GO:0031281~positive regulation of cyclase activity	49	2.03151	8.33997e-29	116, 117, 114, 115, 112, 113, 2642, 111, 2740, 1394, 10203, 155, 154, 7253, 153, 5741, 5745, 5744, 5032, 196883, 122042, 1909, 1812, 1814, 1816, 135, 8698, 136, 3363, 2696, 4988, 8811, 109, 108, 107, 554, 799, 2776, 2778, 796, 2692, 2691, 2774, 2492, 3973, 2587, 4915, 140, 4914	2278	57	13528	5.10506	3.77801e-25	3.7406e-27	1.57065e-25
GOTERM_BP_FAT	GO:0030005~cellular di-, tri-valent inorganic cation homeostasis	111	4.60199	8.37343e-29	2147, 2149, 5733, 5021, 487, 6347, 2740, 6348, 5020, 488, 6352, 6869, 6356, 6354, 538, 886, 2150, 5741, 887, 5745, 3710, 5030, 1901, 1902, 1903, 477, 5367, 4886, 1906, 3717, 348, 1907, 540, 1909, 6363, 2847, 1812, 1813, 1814, 1816, 4609, 56923, 7201, 1910, 2769, 10672, 2785, 7040, 728, 2837, 6375, 623, 5348, 10803, 729230, 624, 10800, 2833, 2395, 799, 797, 796, 491, 6387, 2826, 719, 2280, 9170, 2…	2278	227	13528	2.90387	3.79316e-25	3.71879e-27	1.57695e-25
GOTERM_BP_FAT	GO:0007626~locomotory behavior	125	5.18242	9.07871e-29	154796, 6349, 6347, 6348, 3684, 79902, 6352, 6351, 1524, 6356, 6354, 538, 414062, 4923, 5159, 478, 477, 4886, 4887, 1907, 6361, 1908, 6364, 6363, 6366, 3689, 6367, 1812, 7200, 1813, 1814, 55558, 6360, 1910, 129521, 1432, 2788, 5048, 728, 727, 6376, 6375, 6374, 4803, 56413, 6373, 6372, 10803, 6370, 729230, 10800, 2833, 2395, 27202, 5153, 5154, 5155, 5898, 10928, 2775, 491, 6387, 2826, 719, 2829, 5…	2278	274	13528	2.70919	4.11265e-25	3.99287e-27	1.70977e-25
GOTERM_BP_FAT	GO:0030003~cellular cation homeostasis	119	4.93367	1.05791e-28	2147, 2149, 5733, 5021, 487, 6347, 2740, 6348, 5020, 488, 6352, 6869, 6356, 480, 6354, 538, 886, 2150, 5741, 887, 5745, 3710, 5030, 1901, 1902, 1903, 477, 5367, 4886, 1906, 3717, 348, 1907, 540, 1909, 6363, 2847, 1812, 1813, 1814, 1816, 4609, 7201, 56923, 1910, 2769, 10672, 51606, 2785, 7040, 728, 2837, 5348, 6375, 623, 10803, 23327, 729230, 624, 10800, 2833, 2395, 817, 799, 797, 796, 491, 6387, …	2278	254	13528	2.78223	4.79231e-25	4.60799e-27	1.99233e-25
GOTERM_BP_FAT	GO:0022904~respiratory electron transport chain	52	2.15589	2.67517e-28	4698, 4697, 374291, 4519, 6390, 4513, 4512, 4514, 6507, 4508, 7381, 4509, 4695, 4696, 7388, 4694, 7384, 4709, 4707, 4708, 4705, 4706, 4704, 4541, 4540, 4701, 4702, 10975, 4700, 4731, 4538, 4539, 727947, 4536, 4537, 4535, 4716, 4728, 4717, 4718, 4719, 4729, 1738, 4724, 4712, 4723, 4713, 4714, 4726, 4725, 4715, 440567, 4720, 4722, 4710, 4711, 6389	2278	64	13528	4.82507	1.21185e-24	1.15414e-26	5.03808e-25
GOTERM_BP_FAT	GO:0007200~activation of phospholipase C activity by G-protein coupled receptor protein signaling pathway coupled to IP3 second messenger	46	1.90713	3.92356e-28	2915, 1910, 2149, 5733, 2769, 2767, 1128, 1129, 3356, 3358, 6869, 3357, 9002, 886, 3579, 887, 4829, 4159, 5745, 5030, 5031, 10316, 23620, 1901, 2776, 5032, 796, 23566, 1906, 1241, 5028, 1909, 5029, 3060, 3973, 2782, 183, 185, 51764, 1812, 1813, 1816, 3062, 3269, 56923, 51289	2278	52	13528	5.25333	1.77737e-24	1.67676e-26	7.38915e-25
GOTERM_BP_FAT	GO:0015980~energy derivation by oxidation of organic compounds	83	3.44113	5.84581e-28	4698, 4697, 5162, 155, 374291, 4519, 6392, 6390, 6391, 4513, 4512, 51422, 4514, 4191, 6507, 53632, 207, 4508, 7381, 4509, 5501, 4160, 5500, 5499, 4695, 4696, 7388, 4694, 7385, 7384, 9365, 3420, 4709, 4707, 1743, 23530, 4708, 1431, 4705, 4706, 2932, 4704, 4541, 4701, 283398, 4540, 4702, 4700, 10975, 4731, 4538, 4539, 4536, 2271, 727947, 4537, 4535, 3419, 3418, 1544, 2395, 4716, 4728, 4717, 4718, 4…	2278	144	13528	3.42291	2.64815e-24	2.47491e-26	1.10093e-24
GOTERM_BP_FAT	GO:0009144~purine nucleoside triphosphate metabolic process	75	3.10945	8.82847e-28	148229, 23200, 487, 57205, 9551, 489, 10396, 488, 535, 482, 483, 480, 533, 481, 539, 538, 51422, 4514, 4650, 506, 509, 23120, 27032, 9914, 476, 9296, 478, 477, 50617, 23545, 479, 4508, 540, 4509, 9114, 10476, 79895, 51761, 374868, 2071, 51606, 90423, 513, 5205, 7040, 10632, 245972, 57198, 8992, 245973, 57194, 516, 515, 23250, 514, 9525, 10312, 4719, 51382, 496, 495, 10079, 498, 491, 522, 521, 492…	2278	122	13528	3.65074	3.9993e-24	3.70305e-26	1.66265e-24
GOTERM_BP_FAT	GO:0055066~di-, tri-valent inorganic cation homeostasis	113	4.68491	1.04445e-27	2147, 2149, 5733, 5021, 487, 6347, 2740, 6348, 5020, 488, 6352, 6869, 6356, 6354, 538, 886, 2150, 5741, 887, 5745, 3710, 5030, 1901, 1902, 1903, 477, 5367, 4886, 1906, 3717, 348, 1907, 540, 1909, 1594, 6363, 2847, 1812, 1813, 1814, 1816, 4609, 56923, 7201, 1910, 2769, 10672, 2785, 7040, 728, 2837, 6375, 623, 5348, 10803, 729230, 624, 10800, 2833, 2395, 799, 797, 796, 491, 6387, 2826, 2280, 719, 9…	2278	239	13528	2.80776	4.73135e-24	4.34069e-26	1.96699e-24
GOTERM_BP_FAT	GO:0010033~response to organic substance	237	9.82587	2.70426e-27	338, 6774, 6772, 6347, 59345, 336, 156, 6870, 51083, 3726, 3480, 6352, 4615, 3481, 6869, 1583, 6868, 1978, 552891, 23645, 1081, 207, 4886, 208, 348, 3717, 540, 1594, 2, 51764, 1812, 6777, 1813, 6776, 7200, 1814, 6778, 58496, 1816, 4792, 56923, 4609, 10726, 920, 6750, 1432, 3845, 3949, 7040, 623, 1460, 7048, 7046, 1846, 2308, 8850, 130399, 10076, 10603, 5337, 2829, 5770, 6382, 7057, 114, 115, 2716…	2278	721	13528	1.95206	1.22503e-23	1.11366e-25	5.09287e-24
GOTERM_BP_FAT	GO:0055080~cation homeostasis	126	5.22388	2.99502e-27	2147, 2149, 5733, 487, 5021, 6347, 2740, 6348, 5020, 488, 6352, 6869, 6356, 480, 6354, 538, 2150, 886, 887, 5741, 5745, 3710, 5030, 1901, 1902, 1903, 50617, 477, 5367, 4886, 1906, 1585, 3717, 479, 348, 1907, 540, 1909, 1594, 6363, 2847, 1812, 1813, 1814, 1816, 4609, 7201, 56923, 1910, 2769, 10672, 51606, 2785, 7040, 728, 2837, 5348, 6375, 623, 10803, 23327, 729230, 624, 10800, 2833, 2395, 817, 79…	2278	286	13528	2.61628	1.35674e-23	1.22229e-25	5.64045e-24
GOTERM_BP_FAT	GO:0040012~regulation of locomotion	97	4.02156	1.30198e-26	154796, 2149, 284217, 3479, 3480, 3481, 6869, 6868, 8877, 2150, 5159, 51564, 3714, 4318, 2321, 3091, 1901, 3690, 207, 1906, 1907, 348, 3717, 1908, 1812, 1813, 1814, 3912, 1816, 6750, 10672, 5045, 1128, 553158, 10014, 7040, 623, 7422, 7424, 10013, 102, 4092, 64411, 57142, 5154, 5155, 5156, 394, 324, 9564, 8660, 10076, 5340, 6387, 182, 183, 5337, 186, 1839, 7057, 3627, 84634, 5578, 10395, 3383, 725…	2278	192	13528	3.0002	5.89797e-23	5.26604e-25	2.45199e-23
GOTERM_BP_FAT	GO:0051270~regulation of cell motion	97	4.02156	2.16687e-26	154796, 2149, 284217, 3479, 3480, 6869, 3481, 6868, 8877, 2150, 5159, 51564, 3714, 4318, 2321, 3091, 1901, 3690, 207, 1906, 1907, 348, 3717, 1908, 6777, 1812, 1813, 3912, 1816, 55558, 6750, 10672, 5045, 553158, 10014, 7040, 623, 7422, 7424, 10013, 7046, 102, 4092, 64411, 57142, 5154, 5155, 5156, 116985, 394, 324, 9564, 8660, 10076, 5340, 6387, 182, 183, 5337, 186, 1839, 7057, 3627, 84634, 2683, 1…	2278	193	13528	2.98466	9.81594e-23	8.68667e-25	4.08083e-23
GOTERM_BP_FAT	GO:0008624~induction of apoptosis by extracellular signals	69	2.8607	1.13771e-25	6655, 440917, 5578, 9459, 50649, 9828, 1392, 9826, 50650, 84033, 23370, 27237, 25791, 2245, 221472, 8878, 572, 5741, 1894, 9500, 6453, 6610, 8874, 55851, 23365, 7409, 5924, 23229, 836, 835, 7311, 29, 89846, 23263, 7410, 728590, 7074, 7204, 5879, 6654, 4168, 134, 135, 6753, 6750, 5599, 27018, 5664, 51107, 26574, 7189, 23421, 10276, 83464, 4803, 4804, 10018, 8997, 393, 26230, 11214, 916, 51079, 623…	2278	112	13528	3.65857	5.15384e-22	4.52091e-24	2.14263e-22
GOTERM_BP_FAT	GO:0048878~chemical homeostasis	182	7.54561	2.38343e-25	5950, 338, 2147, 6774, 2149, 5733, 487, 5021, 3479, 6347, 2740, 5020, 6348, 336, 335, 488, 6352, 3481, 6869, 6356, 480, 6354, 885, 538, 2150, 886, 887, 5741, 5745, 5744, 3710, 5030, 3091, 1901, 1902, 344, 1903, 345, 50617, 477, 5367, 4886, 1585, 1906, 1907, 348, 479, 3717, 1584, 1909, 540, 1594, 5029, 6363, 2847, 1812, 1813, 1814, 1816, 4609, 7201, 56923, 1910, 4023, 5140, 2769, 10672, 2767, 1008…	2278	512	13528	2.11097	1.07969e-21	9.38864e-24	4.48866e-22
GOTERM_BP_FAT	GO:0006164~purine nucleotide biosynthetic process	81	3.35821	2.87366e-25	148229, 114, 115, 112, 113, 23200, 111, 487, 57205, 9551, 489, 488, 10396, 535, 482, 483, 480, 533, 481, 539, 538, 51422, 4514, 506, 509, 23120, 27032, 9914, 476, 9296, 478, 196883, 477, 50617, 23545, 479, 4508, 540, 4509, 9114, 10476, 79895, 51761, 374868, 135, 133, 51606, 90423, 513, 5205, 7040, 109, 108, 10632, 107, 245972, 57198, 8992, 245973, 57194, 516, 515, 23250, 514, 10312, 51382, 496, 4…	2278	148	13528	3.25015	1.30177e-21	1.12222e-23	5.41191e-22
GOTERM_BP_FAT	GO:0051726~regulation of cell cycle	135	5.59701	3.07753e-25	8881, 4303, 685, 940, 8317, 332, 3479, 8318, 3726, 3481, 6868, 8525, 8877, 81620, 672, 11140, 4193, 207, 1906, 9735, 1908, 3688, 545, 472, 4221, 55055, 6777, 6776, 1814, 4609, 8243, 11130, 1459, 1432, 7514, 84126, 2071, 440577, 2068, 2069, 7040, 4803, 5139, 4804, 10733, 1642, 4091, 595, 8379, 8851, 648152, 890, 699, 817, 1111, 80254, 324, 3014, 1062, 26271, 9183, 2965, 995, 651610, 993, 990, 9184…	2278	331	13528	2.42206	1.39412e-21	1.19156e-23	5.79585e-22
GOTERM_BP_FAT	GO:0009141~nucleoside triphosphate metabolic process	75	3.10945	4.60853e-25	148229, 23200, 487, 57205, 9551, 489, 10396, 488, 535, 482, 483, 480, 533, 481, 539, 538, 51422, 4514, 4650, 506, 509, 23120, 27032, 9914, 476, 9296, 478, 477, 50617, 23545, 479, 4508, 540, 4509, 9114, 10476, 79895, 51761, 374868, 2071, 51606, 90423, 513, 5205, 7040, 10632, 245972, 57198, 8992, 245973, 57194, 516, 515, 23250, 514, 9525, 10312, 4719, 51382, 496, 495, 10079, 498, 491, 522, 521, 492…	2278	131	13528	3.39993	2.08767e-21	1.76921e-23	8.67916e-22
GOTERM_BP_FAT	GO:0022900~electron transport chain	69	2.8607	4.94051e-25	4698, 4697, 2110, 374291, 2109, 4519, 6392, 6390, 6391, 4513, 4512, 2108, 4514, 6507, 4508, 7381, 4509, 4695, 4696, 7388, 4694, 7386, 7385, 7384, 54539, 4709, 4707, 4708, 4705, 4706, 4704, 4541, 4701, 4540, 4702, 2232, 10975, 4700, 27089, 2230, 4731, 4538, 4539, 4536, 727947, 4537, 4535, 126328, 4716, 4728, 4717, 4718, 4719, 4729, 4712, 1738, 4724, 4723, 4713, 4714, 4726, 4715, 4725, 51079, 11281…	2278	114	13528	3.59438	2.23805e-21	1.88072e-23	9.30437e-22
GOTERM_BP_FAT	GO:0009152~purine ribonucleotide biosynthetic process	70	2.90216	5.69283e-25	148229, 23200, 487, 57205, 9551, 489, 10396, 488, 535, 482, 483, 480, 533, 481, 539, 538, 51422, 4514, 506, 509, 23120, 27032, 9914, 476, 9296, 478, 477, 50617, 23545, 479, 4508, 540, 4509, 9114, 10476, 79895, 51761, 374868, 51606, 90423, 513, 5205, 7040, 10632, 245972, 57198, 8992, 245973, 57194, 516, 515, 23250, 514, 10312, 51382, 496, 495, 10079, 498, 491, 522, 521, 492, 493, 523, 490, 529, 52…	2278	117	13528	3.55297	2.57885e-21	2.14904e-23	1.07212e-21
GOTERM_BP_FAT	GO:0040017~positive regulation of locomotion	63	2.61194	6.44288e-25	154796, 3627, 2149, 5578, 3479, 3383, 3480, 6869, 3481, 6868, 2247, 8877, 2150, 3630, 723961, 3576, 5159, 51564, 2066, 4318, 5604, 2321, 3091, 3791, 3815, 1901, 1906, 1907, 3717, 1233, 1908, 6198, 2255, 4088, 1812, 55615, 3643, 58191, 3912, 5594, 1956, 5045, 553158, 7040, 623, 7422, 7424, 10013, 23779, 102, 3673, 5154, 5155, 5156, 394, 653882, 9734, 324, 9564, 8660, 6387, 183, 6863, 5337, 3667, 1…	2278	98	13528	3.81763	2.91863e-21	2.41209e-23	1.21338e-21
GOTERM_BP_FAT	GO:0030334~regulation of cell migration	87	3.60697	1.18436e-24	154796, 3627, 84634, 2149, 284217, 3479, 10395, 3383, 3480, 6869, 3481, 6868, 2247, 8877, 7852, 2150, 3630, 723961, 5159, 2066, 51564, 3714, 4318, 54567, 5604, 3091, 2321, 3791, 3815, 1901, 3690, 207, 1906, 3717, 348, 1907, 1908, 6198, 4088, 1812, 55615, 1813, 3643, 58191, 3912, 1816, 5879, 5594, 134, 6750, 1956, 10672, 5045, 553158, 3909, 3908, 10014, 7040, 7422, 623, 7424, 10013, 23779, 102, 40…	2278	169	13528	3.05712	5.36513e-21	4.39765e-23	2.23047e-21
GOTERM_BP_FAT	GO:0006163~purine nucleotide metabolic process	92	3.81426	2.01273e-24	148229, 114, 115, 112, 113, 23200, 111, 487, 57205, 9551, 489, 488, 10396, 535, 482, 483, 480, 533, 481, 539, 538, 51422, 5741, 4514, 4650, 506, 509, 5744, 23120, 27032, 9914, 476, 9296, 478, 196883, 477, 50617, 23545, 479, 4508, 540, 4509, 9114, 10476, 79895, 51761, 374868, 135, 5140, 133, 5144, 2071, 51606, 90423, 513, 5205, 7040, 8622, 109, 108, 10632, 107, 245972, 57198, 8992, 245973, 57194, …	2278	186	13528	2.93734	9.11767e-21	7.41274e-23	3.79053e-21
GOTERM_BP_FAT	GO:0030335~positive regulation of cell migration	59	2.4461	2.26856e-24	154796, 3627, 2149, 3479, 3383, 3480, 6869, 3481, 6868, 2247, 8877, 2150, 3630, 723961, 5159, 51564, 2066, 4318, 5604, 2321, 3091, 3791, 3815, 1901, 1906, 1907, 3717, 1908, 6198, 4088, 1812, 55615, 3643, 58191, 3912, 5594, 1956, 5045, 553158, 7040, 623, 7422, 7424, 10013, 102, 23779, 3673, 5154, 5155, 5156, 394, 653882, 9734, 324, 9564, 8660, 6387, 183, 6863, 5337, 3667, 1839, 5295, 7057	2278	89	13528	3.93679	1.02766e-20	8.28757e-23	4.27234e-21
GOTERM_BP_FAT	GO:0007189~activation of adenylate cyclase activity by G-protein signaling pathway	37	1.534	4.84654e-24	135, 114, 115, 112, 2642, 113, 8698, 136, 111, 10203, 3363, 155, 154, 7253, 153, 4988, 2696, 8811, 109, 108, 107, 5741, 5745, 5744, 799, 2776, 2778, 196883, 2692, 2691, 122042, 2774, 2492, 2587, 1812, 1814, 1816	2278	40	13528	5.49315	2.19548e-20	1.75639e-22	9.12739e-21
GOTERM_BP_FAT	GO:0010579~positive regulation of adenylate cyclase activity by G-protein signaling pathway	37	1.534	4.84654e-24	135, 114, 115, 112, 2642, 113, 8698, 136, 111, 10203, 3363, 155, 154, 7253, 153, 4988, 2696, 8811, 109, 108, 107, 5741, 5745, 5744, 799, 2776, 2778, 196883, 2692, 2691, 122042, 2774, 2492, 2587, 1812, 1814, 1816	2278	40	13528	5.49315	2.19548e-20	1.75639e-22	9.12739e-21
GOTERM_BP_FAT	GO:0010578~regulation of adenylate cyclase activity involved in G-protein signaling	37	1.534	4.84654e-24	135, 114, 115, 112, 2642, 113, 8698, 136, 111, 10203, 3363, 155, 154, 7253, 153, 4988, 2696, 8811, 109, 108, 107, 5741, 5745, 5744, 799, 2776, 2778, 196883, 2692, 2691, 122042, 2774, 2492, 2587, 1812, 1814, 1816	2278	40	13528	5.49315	2.19548e-20	1.75639e-22	9.12739e-21
GOTERM_BP_FAT	GO:0051272~positive regulation of cell motion	62	2.57048	5.46386e-24	154796, 3627, 2149, 3479, 3383, 3480, 6869, 3481, 6868, 2247, 8877, 2150, 3630, 723961, 5159, 51564, 2066, 4318, 5604, 2321, 3091, 3791, 3815, 1901, 1906, 1907, 3717, 1908, 6198, 4088, 1812, 6777, 55615, 3643, 58191, 3912, 5594, 1956, 5045, 553158, 7040, 623, 7422, 7424, 10013, 23779, 7046, 102, 3673, 5154, 5155, 5156, 394, 653882, 9734, 324, 9564, 8660, 6387, 183, 6863, 5337, 3667, 1839, 4067, 5…	2278	98	13528	3.75704	2.47513e-20	1.96439e-22	1.029e-20
GOTERM_BP_FAT	GO:0007265~Ras protein signal transduction	64	2.6534	1.7376e-23	5894, 6464, 3479, 9411, 9826, 335, 50650, 150, 9101, 388, 387, 2247, 57381, 5741, 10750, 4650, 6093, 5600, 5605, 10235, 5603, 5604, 345, 1796, 348, 9402, 4893, 2885, 5595, 29984, 1278, 6654, 5594, 7867, 3265, 9908, 1432, 6300, 9261, 2768, 3845, 10672, 53358, 727758, 4803, 6714, 391, 7529, 393, 5899, 392, 5898, 395, 394, 5900, 1399, 2782, 25759, 9138, 5337, 396, 397, 398, 4914, 10125	2278	105	13528	3.61968	7.87131e-20	6.19788e-22	3.27238e-20
GOTERM_BP_FAT	GO:0032147~activation of protein kinase activity	67	2.77778	2.56343e-23	55437, 114, 115, 84634, 112, 2149, 113, 3084, 5577, 111, 2911, 154, 3481, 2247, 8525, 1154, 8877, 8526, 885, 8527, 3630, 723961, 160851, 4035, 2321, 5170, 196883, 1906, 1907, 3717, 1909, 5590, 3643, 134, 135, 5618, 1956, 1609, 56034, 1607, 1608, 56848, 1128, 1950, 1606, 7189, 2771, 623, 9162, 109, 108, 107, 7048, 3654, 7046, 92335, 93, 5566, 5567, 5568, 2690, 796, 8611, 3060, 5573, 5576, 5575, 56…	2278	114	13528	3.4902	1.16123e-19	9.07212e-22	4.82765e-20
GOTERM_BP_FAT	GO:0009150~purine ribonucleotide metabolic process	75	3.10945	3.41667e-23	148229, 23200, 487, 57205, 9551, 489, 10396, 488, 535, 482, 483, 480, 533, 481, 539, 538, 51422, 4514, 4650, 506, 509, 23120, 27032, 9914, 476, 9296, 478, 477, 50617, 23545, 479, 4508, 540, 4509, 9114, 10476, 79895, 51761, 374868, 2071, 51606, 90423, 513, 5205, 7040, 10632, 245972, 57198, 8992, 245973, 57194, 516, 515, 23250, 514, 9525, 10312, 4719, 51382, 496, 495, 10079, 498, 491, 522, 521, 492…	2278	138	13528	3.22747	1.54775e-19	1.19981e-21	6.43454e-20
GOTERM_BP_FAT	GO:0051345~positive regulation of hydrolase activity	88	3.64842	3.69329e-23	84144, 5330, 2915, 842, 2147, 2149, 6772, 5733, 7249, 846, 10395, 335, 6869, 9002, 885, 3579, 886, 887, 4829, 4159, 5745, 1285, 5604, 5030, 1901, 5031, 5032, 1902, 344, 1906, 85360, 3717, 1241, 1909, 5028, 5029, 5590, 7248, 51764, 4088, 4221, 1812, 1813, 1816, 56923, 4609, 5319, 1910, 8698, 1956, 2769, 10672, 1029, 2767, 1128, 1129, 3356, 81565, 728, 3358, 3357, 552, 553, 3673, 7013, 395, 116985,…	2278	179	13528	2.91951	1.67306e-19	1.28697e-21	6.95549e-20
GOTERM_BP_FAT	GO:0006468~protein amino acid phosphorylation	214	8.87231	3.71519e-23	6772, 8317, 6347, 156, 3480, 150, 151, 6356, 57761, 6093, 5747, 2321, 2324, 207, 208, 3718, 3717, 29904, 545, 6776, 7204, 1457, 1459, 1453, 5618, 1432, 1452, 1455, 1454, 10087, 7040, 728, 727, 5347, 7048, 7046, 10733, 4092, 1445, 8851, 814, 92335, 648152, 815, 816, 817, 818, 130399, 651610, 613, 121512, 3932, 7057, 728642, 84432, 984, 2475, 983, 84033, 2247, 7852, 5600, 5605, 30849, 5603, 5604, 2…	2278	667	13528	1.90532	1.68298e-19	1.28472e-21	6.99675e-20
GOTERM_BP_FAT	GO:0009260~ribonucleotide biosynthetic process	70	2.90216	5.99262e-23	148229, 23200, 487, 57205, 9551, 489, 10396, 488, 535, 482, 483, 480, 533, 481, 539, 538, 51422, 4514, 506, 509, 23120, 27032, 9914, 476, 9296, 478, 477, 50617, 23545, 479, 4508, 540, 4509, 9114, 10476, 79895, 51761, 374868, 51606, 90423, 513, 5205, 7040, 10632, 245972, 57198, 8992, 245973, 57194, 516, 515, 23250, 514, 10312, 51382, 496, 495, 10079, 498, 491, 522, 521, 492, 493, 523, 490, 529, 52…	2278	124	13528	3.3524	2.71466e-19	2.05656e-21	1.12858e-19
GOTERM_BP_FAT	GO:0009755~hormone-mediated signaling	42	1.74129	1.13519e-22	114, 115, 112, 5781, 2642, 113, 2641, 111, 5577, 2788, 2787, 59345, 2784, 2783, 2786, 2785, 2790, 2791, 109, 54331, 108, 107, 55970, 94235, 552891, 26524, 5566, 5567, 5568, 2690, 2778, 196883, 2693, 3717, 51738, 548645, 3973, 2782, 9113, 5573, 5576, 5575, 51764, 7200	2278	52	13528	4.79652	5.1424e-19	3.86647e-21	2.13788e-19
GOTERM_BP_FAT	GO:0042592~homeostatic process	231	9.57711	2.77757e-22	338, 6774, 5733, 3479, 6347, 6348, 336, 155, 335, 154, 6352, 153, 3481, 6869, 6356, 6354, 538, 65057, 5741, 5745, 5744, 3710, 3091, 344, 345, 50617, 207, 4886, 1585, 5367, 3717, 1584, 348, 540, 1594, 6363, 2847, 4221, 1812, 6777, 1813, 6776, 1814, 1816, 4609, 56923, 7201, 10087, 3949, 728, 7040, 2837, 623, 5348, 6375, 4090, 729230, 624, 4092, 2833, 817, 2309, 23620, 324, 5340, 6387, 10603, 2826, …	2278	751	13528	1.82664	1.25824e-18	9.38983e-21	5.23093e-19
GOTERM_BP_FAT	GO:0006873~cellular ion homeostasis	140	5.80431	5.62054e-22	2147, 2149, 5733, 487, 5021, 6347, 2740, 5020, 6348, 488, 6352, 6869, 6356, 480, 6354, 885, 538, 2150, 886, 887, 5741, 5745, 3710, 5030, 1901, 1902, 1903, 477, 5367, 4886, 1906, 3717, 348, 1907, 1909, 540, 6363, 5029, 2847, 1812, 1813, 1814, 1816, 4609, 7201, 56923, 1910, 2769, 10672, 2767, 51606, 2785, 2068, 728, 7040, 2837, 5348, 623, 6375, 10803, 729230, 23327, 624, 10800, 4092, 2833, 2395, 81…	2278	374	13528	2.22298	2.54611e-18	1.886e-20	1.05851e-18
GOTERM_BP_FAT	GO:0007267~cell-cell signaling	195	8.08458	7.52547e-22	941, 942, 6348, 5739, 51083, 6352, 6351, 3481, 8321, 5368, 151, 6354, 5741, 5747, 7484, 7483, 5744, 1325, 4889, 1081, 5367, 348, 6361, 6364, 6608, 6366, 6367, 1812, 7200, 1813, 1814, 1816, 56923, 6360, 6752, 6753, 6750, 6751, 6375, 6374, 6373, 6372, 2831, 814, 5241, 818, 51384, 183, 116, 3627, 4852, 2254, 10850, 2251, 2250, 3624, 7253, 7252, 2248, 2249, 378708, 2246, 2247, 5327, 10750, 976, 89780…	2278	600	13528	1.93003	3.40904e-18	2.50664e-20	1.41726e-18
GOTERM_BP_FAT	GO:0006818~hydrogen transport	46	1.90713	1.03506e-21	9550, 23530, 9551, 51606, 90423, 513, 7351, 535, 7352, 534, 10632, 480, 533, 127124, 539, 245972, 8992, 245973, 7350, 516, 515, 4514, 514, 506, 509, 10312, 9296, 51382, 496, 477, 495, 50617, 23545, 498, 479, 4508, 522, 521, 4509, 523, 9114, 137872, 10476, 529, 526, 525, 528, 527	2278	63	13528	4.33608	4.68881e-18	3.42249e-20	1.9493e-18
GOTERM_BP_FAT	GO:0015992~proton transport	45	1.86567	1.55168e-21	9550, 23530, 9551, 51606, 90423, 513, 7351, 535, 7352, 534, 10632, 480, 533, 127124, 539, 245972, 8992, 245973, 7350, 516, 515, 4514, 514, 506, 509, 10312, 9296, 51382, 496, 477, 495, 50617, 23545, 498, 479, 4508, 522, 521, 4509, 523, 9114, 10476, 529, 526, 525, 528, 527	2278	61	13528	4.38089	7.02913e-18	5.09357e-20	2.92225e-18
GOTERM_BP_FAT	GO:0055082~cellular chemical homeostasis	140	5.80431	3.04853e-21	2147, 2149, 5733, 487, 5021, 6347, 2740, 5020, 6348, 488, 6352, 6869, 6356, 480, 6354, 885, 538, 2150, 886, 887, 5741, 5745, 3710, 5030, 1901, 1902, 1903, 477, 5367, 4886, 1906, 3717, 348, 1907, 1909, 540, 6363, 5029, 2847, 1812, 1813, 1814, 1816, 4609, 7201, 56923, 1910, 2769, 10672, 2767, 51606, 2785, 2068, 728, 7040, 2837, 5348, 623, 6375, 10803, 729230, 23327, 624, 10800, 4092, 2833, 2395, 81…	2278	380	13528	2.18788	1.38098e-17	9.93513e-20	5.74123e-18
GOTERM_BP_FAT	GO:0050801~ion homeostasis	147	6.09453	4.27827e-21	2147, 2149, 5733, 487, 5021, 6347, 2740, 5020, 6348, 488, 6352, 6869, 6356, 480, 6354, 885, 538, 2150, 886, 887, 5741, 5745, 3710, 5030, 1901, 1902, 1903, 50617, 477, 5367, 4886, 1585, 1906, 1907, 3717, 479, 348, 1909, 540, 1594, 6363, 5029, 2847, 1812, 1813, 1814, 1816, 4609, 7201, 56923, 1910, 2769, 10672, 2767, 51606, 2785, 2068, 728, 7040, 2837, 5348, 623, 6375, 10803, 729230, 23327, 624, 108…	2278	409	13528	2.13439	1.93806e-17	1.38433e-19	8.05718e-18
GOTERM_BP_FAT	GO:0009259~ribonucleotide metabolic process	75	3.10945	4.80015e-21	148229, 23200, 487, 57205, 9551, 489, 10396, 488, 535, 482, 483, 480, 533, 481, 539, 538, 51422, 4514, 4650, 506, 509, 23120, 27032, 9914, 476, 9296, 478, 477, 50617, 23545, 479, 4508, 540, 4509, 9114, 10476, 79895, 51761, 374868, 2071, 51606, 90423, 513, 5205, 7040, 10632, 245972, 57198, 8992, 245973, 57194, 516, 515, 23250, 514, 9525, 10312, 4719, 51382, 496, 495, 10079, 498, 491, 522, 521, 492…	2278	147	13528	3.02987	2.17447e-17	1.54218e-19	9.04003e-18
GOTERM_BP_FAT	GO:0007059~chromosome segregation	52	2.15589	1.32633e-20	220134, 64151, 332, 10403, 64946, 54908, 729012, 9700, 5885, 79003, 3619, 11243, 672, 25936, 632, 9918, 79980, 25836, 9113, 4751, 4085, 10051, 8243, 11130, 9985, 8697, 79023, 23397, 113130, 7329, 81565, 348235, 348995, 9126, 10274, 8239, 55355, 10734, 10735, 79172, 81930, 10592, 1062, 151648, 9232, 9183, 57405, 83540, 9184, 23383, 23047, 151246, 81929, 10783	2278	81	13528	3.8124	6.00826e-17	4.23117e-19	2.49785e-17
GOTERM_BP_FAT	GO:0044057~regulation of system process	120	4.97512	1.96353e-20	2149, 685, 487, 5021, 6347, 2740, 5020, 336, 10203, 1392, 6870, 156, 1573, 488, 335, 154, 153, 6869, 3481, 885, 8877, 1286, 2321, 4889, 476, 477, 5367, 4886, 1906, 3717, 348, 1907, 1908, 3351, 4893, 728590, 1812, 1813, 1814, 1816, 56923, 6752, 1910, 10874, 3845, 1129, 2771, 2837, 1131, 4803, 624, 4092, 815, 5566, 9759, 796, 2773, 2775, 491, 183, 185, 6385, 186, 1839, 7532, 2913, 4660, 84634, 2918…	2278	309	13528	2.30623	8.89479e-17	6.22013e-19	3.69788e-17
GOTERM_BP_FAT	GO:0007193~inhibition of adenylate cyclase activity by G-protein signaling	34	1.40962	1.24615e-19	134, 2914, 6752, 114, 115, 112, 113, 2916, 111, 2770, 2771, 4987, 4988, 378708, 4985, 4986, 109, 108, 107, 11251, 1133, 1325, 1901, 1903, 196883, 122042, 4886, 2774, 4887, 2781, 3350, 2847, 1813, 1814, 6755	2278	40	13528	5.04776	5.64504e-16	3.92017e-18	2.34684e-16
GOTERM_BP_FAT	GO:0034220~ion transmembrane transport	38	1.57546	1.90042e-19	487, 51606, 90423, 513, 535, 10632, 533, 480, 539, 245972, 538, 8992, 245973, 516, 515, 4514, 514, 506, 509, 10312, 9296, 51382, 477, 50617, 495, 23545, 498, 540, 4508, 522, 521, 4509, 523, 9114, 10476, 529, 526, 525, 528, 527	2278	49	13528	4.6054	8.60891e-16	5.93718e-18	3.57902e-16
GOTERM_BP_FAT	GO:0009165~nucleotide biosynthetic process	84	3.48259	3.24809e-19	148229, 114, 115, 112, 113, 23200, 111, 7298, 487, 57205, 9551, 489, 488, 10396, 535, 482, 483, 480, 533, 481, 539, 538, 51422, 4514, 506, 509, 23120, 27032, 9914, 476, 9296, 478, 196883, 477, 50617, 23545, 479, 4508, 540, 1719, 4509, 9114, 10476, 79895, 51761, 374868, 135, 133, 6241, 51606, 90423, 513, 5205, 7040, 109, 108, 10632, 107, 245972, 57198, 8992, 245973, 57194, 516, 515, 23250, 514, 10…	2278	186	13528	2.68192	1.47139e-15	1.0078e-17	6.11707e-16
GOTERM_BP_FAT	GO:0007243~protein kinase cascade	133	5.5141	3.64979e-19	10818, 55437, 64805, 2147, 6774, 2149, 6772, 9459, 5021, 54106, 6347, 3480, 3481, 150, 151, 51422, 10718, 9252, 673, 6610, 2321, 1902, 3551, 1796, 207, 3718, 1906, 3717, 4221, 84894, 6777, 6776, 1813, 4792, 9908, 1432, 5618, 2768, 10672, 5617, 8651, 2785, 7189, 2771, 728, 727, 5562, 729230, 9021, 7046, 1848, 1846, 5566, 5567, 5568, 9170, 1399, 186, 121512, 7057, 2914, 4855, 84634, 1147, 5781, 844…	2278	370	13528	2.13467	1.65335e-15	1.12473e-17	6.87357e-16
GOTERM_BP_FAT	GO:0007631~feeding behavior	45	1.86567	2.81162e-18	135, 6774, 10874, 4852, 2641, 11255, 2917, 5021, 5020, 1392, 51083, 8484, 3358, 6869, 5540, 8811, 885, 886, 680, 887, 2834, 2902, 2904, 51052, 4889, 5367, 4886, 5697, 2693, 351, 51738, 3351, 3060, 183, 2847, 4160, 1812, 7200, 2534, 283869, 1813, 4915, 3061, 3062, 56923	2278	69	13528	3.87296	1.27367e-14	8.60585e-17	5.29507e-15
GOTERM_BP_FAT	GO:0051329~interphase of mitotic cell cycle	57	2.36318	2.90816e-18	4303, 1869, 332, 8317, 3624, 10393, 10926, 6868, 26524, 8065, 4193, 5925, 6502, 207, 3688, 8454, 9113, 28227, 5500, 51433, 29945, 4331, 8697, 1956, 113130, 1029, 1785, 1027, 1026, 1032, 1030, 1031, 5422, 29933, 595, 815, 5424, 7013, 816, 817, 818, 5426, 91, 1111, 1017, 1019, 1874, 5532, 5530, 351, 1021, 995, 993, 990, 894, 891, 898	2278	103	13528	3.28638	1.3174e-14	8.84159e-17	5.47688e-15
GOTERM_BP_FAT	GO:0034654~nucleobase, nucleoside, nucleotide and nucleic acid biosynthetic process	84	3.48259	5.14372e-18	148229, 114, 115, 112, 113, 23200, 111, 7298, 487, 57205, 9551, 489, 488, 10396, 535, 482, 483, 480, 533, 481, 539, 538, 51422, 4514, 506, 509, 23120, 27032, 9914, 476, 9296, 478, 196883, 477, 50617, 23545, 479, 4508, 540, 1719, 4509, 9114, 10476, 79895, 51761, 374868, 135, 133, 6241, 51606, 90423, 513, 5205, 7040, 109, 108, 10632, 107, 245972, 57198, 8992, 245973, 57194, 516, 515, 23250, 514, 10…	2278	193	13528	2.58465	2.33011e-14	1.5534e-16	9.68707e-15
GOTERM_BP_FAT	GO:0034404~nucleobase, nucleoside and nucleotide biosynthetic process	84	3.48259	5.14372e-18	148229, 114, 115, 112, 113, 23200, 111, 7298, 487, 57205, 9551, 489, 488, 10396, 535, 482, 483, 480, 533, 481, 539, 538, 51422, 4514, 506, 509, 23120, 27032, 9914, 476, 9296, 478, 196883, 477, 50617, 23545, 479, 4508, 540, 1719, 4509, 9114, 10476, 79895, 51761, 374868, 135, 133, 6241, 51606, 90423, 513, 5205, 7040, 109, 108, 10632, 107, 245972, 57198, 8992, 245973, 57194, 516, 515, 23250, 514, 10…	2278	193	13528	2.58465	2.33011e-14	1.5534e-16	9.68707e-15
GOTERM_BP_FAT	GO:0043067~regulation of programmed cell death	232	9.61857	5.30323e-18	4208, 440917, 6772, 3084, 332, 3479, 6347, 51083, 154, 3480, 4615, 3481, 6868, 25791, 8878, 538, 8877, 5740, 5741, 6093, 3714, 6610, 55851, 8874, 207, 29, 348, 3717, 89846, 6608, 4893, 23263, 7074, 4221, 6777, 6776, 4790, 4792, 7204, 4609, 6753, 6750, 5618, 3845, 7189, 7040, 624, 7046, 4091, 8851, 2308, 2309, 324, 916, 917, 130399, 5340, 9181, 183, 651610, 186, 203068, 23385, 121512, 3932, 7057, …	2278	812	13528	1.69673	2.40236e-14	1.59097e-16	9.98747e-15
GOTERM_BP_FAT	GO:0010941~regulation of cell death	232	9.61857	8.52768e-18	4208, 440917, 6772, 3084, 332, 3479, 6347, 51083, 154, 3480, 4615, 3481, 6868, 25791, 8878, 538, 8877, 5740, 5741, 6093, 3714, 6610, 55851, 8874, 207, 29, 348, 3717, 89846, 6608, 4893, 23263, 7074, 4221, 6777, 6776, 4790, 4792, 7204, 4609, 6753, 6750, 5618, 3845, 7189, 7040, 624, 7046, 4091, 8851, 2308, 2309, 324, 916, 917, 130399, 5340, 9181, 183, 651610, 186, 203068, 23385, 121512, 3932, 7057, …	2278	815	13528	1.69048	3.86304e-14	2.54147e-16	1.606e-14
GOTERM_BP_FAT	GO:0035023~regulation of Rho protein signal transduction	55	2.28027	9.56535e-18	84144, 6655, 9459, 50649, 9828, 10395, 9826, 2475, 84033, 50650, 23370, 27237, 65012, 25791, 2245, 221472, 253260, 1894, 6453, 8874, 23365, 7409, 5924, 1902, 23229, 29, 85360, 89846, 64223, 23263, 7410, 7248, 7074, 7204, 5879, 6654, 4168, 51291, 5048, 81565, 10276, 8997, 64411, 26230, 116985, 11214, 10928, 115557, 9181, 9170, 9138, 57449, 613, 121512, 64857, 10451	2278	99	13528	3.29919	4.3331e-14	2.83209e-16	1.80142e-14
GOTERM_BP_FAT	GO:0042981~regulation of apoptosis	229	9.4942	1.32522e-17	4208, 440917, 6772, 3084, 332, 3479, 6347, 51083, 154, 3480, 4615, 3481, 6868, 25791, 8878, 538, 8877, 5740, 5741, 6093, 3714, 6610, 55851, 8874, 207, 29, 348, 3717, 89846, 6608, 4893, 23263, 7074, 4221, 6777, 6776, 4790, 4792, 7204, 4609, 6753, 6750, 5618, 3845, 7189, 7040, 624, 7046, 4091, 8851, 2308, 2309, 324, 916, 917, 130399, 5340, 9181, 183, 651610, 186, 203068, 23385, 121512, 3932, 7057, …	2278	804	13528	1.69145	6.00323e-14	3.8982e-16	2.49575e-14
GOTERM_BP_FAT	GO:0051325~interphase	57	2.36318	1.66378e-17	4303, 1869, 332, 8317, 3624, 10393, 10926, 6868, 26524, 8065, 4193, 5925, 6502, 207, 3688, 8454, 9113, 28227, 5500, 51433, 29945, 4331, 8697, 1956, 113130, 1029, 1785, 1027, 1026, 1032, 1030, 1031, 5422, 29933, 595, 815, 5424, 7013, 816, 817, 818, 5426, 91, 1111, 1017, 1019, 1874, 5532, 5530, 351, 1021, 995, 993, 990, 894, 891, 898	2278	106	13528	3.19337	7.53694e-14	4.86254e-16	3.13337e-14
GOTERM_BP_FAT	GO:0051240~positive regulation of multicellular organismal process	97	4.02156	1.8195e-17	2147, 2149, 685, 3084, 5021, 487, 6347, 5020, 57678, 1392, 6870, 155, 154, 6352, 4615, 153, 6869, 3481, 6868, 8877, 1286, 3091, 476, 1385, 207, 5367, 4886, 1906, 3717, 1907, 1908, 6696, 728590, 6777, 1812, 6776, 1813, 9365, 10874, 7189, 2069, 7040, 2837, 1131, 93, 92, 796, 23493, 5340, 183, 186, 7057, 84634, 60675, 2683, 8767, 2254, 7253, 2247, 3630, 723961, 2066, 5321, 6507, 7311, 5590, 4160, 40…	2278	244	13528	2.36081	8.24234e-14	5.28355e-16	3.42663e-14
GOTERM_BP_FAT	GO:0043065~positive regulation of apoptosis	143	5.92869	3.6705e-17	6772, 9459, 440917, 1392, 51083, 5533, 5534, 154, 25791, 8878, 885, 5740, 5741, 1894, 4318, 6610, 1285, 672, 55851, 8874, 7409, 207, 3717, 348, 29, 89846, 7410, 23263, 7074, 728590, 472, 4221, 7204, 4609, 6753, 6750, 27018, 2071, 1785, 51107, 8655, 2068, 23421, 7189, 7040, 83464, 10276, 4803, 10013, 4804, 10018, 7046, 8851, 7529, 393, 2309, 91, 324, 916, 5340, 9181, 651610, 183, 186, 203068, 2338…	2278	430	13528	1.97491	1.66274e-13	1.05907e-15	6.91258e-14
GOTERM_BP_FAT	GO:0015986~ATP synthesis coupled proton transport	32	1.3267	4.58223e-17	51606, 90423, 513, 535, 10632, 533, 245972, 539, 8992, 245973, 516, 515, 4514, 514, 506, 509, 10312, 51382, 9296, 50617, 23545, 498, 4508, 522, 521, 4509, 523, 9114, 10476, 529, 526, 525, 528, 527	2278	40	13528	4.75083	2.07575e-13	1.31377e-15	8.62962e-14
GOTERM_BP_FAT	GO:0015985~energy coupled proton transport, down electrochemical gradient	32	1.3267	4.58223e-17	51606, 90423, 513, 535, 10632, 533, 245972, 539, 8992, 245973, 516, 515, 4514, 514, 506, 509, 10312, 51382, 9296, 50617, 23545, 498, 4508, 522, 521, 4509, 523, 9114, 10476, 529, 526, 525, 528, 527	2278	40	13528	4.75083	2.07575e-13	1.31377e-15	8.62962e-14
GOTERM_BP_FAT	GO:0043068~positive regulation of programmed cell death	143	5.92869	7.11442e-17	6772, 9459, 440917, 1392, 51083, 5533, 5534, 154, 25791, 8878, 885, 5740, 5741, 1894, 4318, 6610, 1285, 672, 55851, 8874, 7409, 207, 3717, 348, 29, 89846, 7410, 23263, 7074, 728590, 472, 4221, 7204, 4609, 6753, 6750, 27018, 2071, 1785, 51107, 8655, 2068, 23421, 7189, 7040, 83464, 10276, 4803, 10013, 4804, 10018, 7046, 8851, 7529, 393, 2309, 91, 324, 916, 5340, 9181, 651610, 183, 186, 203068, 2338…	2278	433	13528	1.96123	5.02931e-13	3.10862e-15	2.10942e-13
GOTERM_BP_FAT	GO:0010942~positive regulation of cell death	143	5.92869	2.20992e-16	6772, 9459, 440917, 1392, 51083, 5533, 5534, 154, 25791, 8878, 885, 5740, 5741, 1894, 4318, 6610, 1285, 672, 55851, 8874, 7409, 207, 3717, 348, 29, 89846, 7410, 23263, 7074, 728590, 472, 4221, 7204, 4609, 6753, 6750, 27018, 2071, 1785, 51107, 8655, 2068, 23421, 7189, 7040, 83464, 10276, 4803, 10013, 4804, 10018, 7046, 8851, 7529, 393, 2309, 91, 324, 916, 5340, 9181, 651610, 183, 186, 203068, 2338…	2278	435	13528	1.95221	1.00586e-12	6.32827e-15	4.21885e-13
GOTERM_BP_FAT	GO:0010647~positive regulation of cell communication	117	4.85075	2.5398e-16	941, 2149, 5021, 3479, 6347, 2099, 5020, 155, 154, 4615, 6869, 3481, 6868, 253260, 5741, 1894, 7483, 1286, 3091, 2321, 1902, 3717, 1594, 64223, 4893, 8312, 728590, 4221, 1812, 1814, 920, 10874, 5970, 3845, 5045, 5617, 7189, 2069, 7040, 7422, 9218, 10013, 23118, 7046, 93, 92, 91, 916, 2280, 182, 9170, 183, 3932, 7057, 2914, 84634, 5781, 50852, 4853, 2254, 8767, 2475, 389, 387, 11251, 3630, 723961,…	2278	329	13528	2.11188	1.00586e-12	6.21725e-15	4.21885e-13
GOTERM_BP_FAT	GO:0043434~response to peptide hormone stimulus	70	2.90216	3.59693e-16	5950, 6121, 4303, 6774, 682, 6464, 5578, 6772, 5021, 5020, 51083, 3726, 2475, 3480, 6352, 3481, 8835, 1978, 5584, 3630, 723961, 2065, 5588, 5170, 207, 208, 4747, 3717, 6198, 2887, 7248, 2885, 4160, 1812, 1277, 6777, 6776, 3643, 5406, 5319, 10726, 5140, 133, 5970, 8651, 2931, 7472, 10014, 4803, 9021, 8503, 890, 8850, 2308, 9734, 9564, 2690, 130399, 8660, 2692, 2693, 10603, 23433, 2549, 2688, 5337,…	2278	154	13528	2.69934	1.50879e-12	9.32587e-15	6.21725e-13
GOTERM_BP_FAT	GO:0051050~positive regulation of transport	89	3.68988	4.2878e-16	5950, 64805, 805, 2147, 84634, 5781, 2149, 685, 5578, 801, 5021, 57534, 5020, 3625, 1392, 156, 8843, 646227, 3624, 154, 6869, 3481, 387, 723961, 3630, 5584, 2066, 8399, 2904, 2065, 5321, 5588, 6506, 1385, 207, 1906, 208, 3717, 348, 1907, 5028, 1909, 1908, 6608, 5590, 2255, 2847, 4088, 1812, 7200, 4089, 1813, 3643, 338442, 4792, 9965, 5319, 134, 135, 10874, 136, 2932, 867, 4734, 5715, 3358, 7040, …	2278	223	13528	2.37009	2.01172e-12	1.23235e-14	8.32667e-13
GOTERM_BP_FAT	GO:0009611~response to wounding	164	6.79934	5.13079e-16	2147, 64805, 6774, 2149, 3084, 5733, 9241, 6349, 2335, 54106, 3479, 6347, 6348, 336, 3683, 1392, 51083, 59340, 6352, 4615, 6351, 3481, 6869, 1524, 6868, 6356, 3678, 6354, 1289, 414062, 2150, 2151, 1281, 30814, 3091, 3690, 8111, 1903, 207, 3694, 3717, 5028, 6361, 2, 6364, 6608, 6363, 6366, 3689, 6696, 6367, 6777, 4790, 1816, 6360, 9365, 5970, 2768, 10672, 2266, 10014, 2069, 7040, 727, 623, 4803, 6…	2278	530	13528	1.83759	2.51466e-12	1.53211e-14	1.04361e-12
GOTERM_BP_FAT	GO:0009416~response to light stimulus	64	2.6534	2.07446e-15	5950, 842, 2916, 3726, 10692, 94233, 10381, 4157, 261734, 2902, 2067, 2903, 2652, 653238, 3815, 6506, 6507, 24, 728458, 478, 477, 7508, 207, 836, 7507, 408, 4893, 1812, 4221, 1813, 1814, 1816, 6010, 3265, 5599, 10874, 1956, 5970, 2072, 3845, 2071, 4734, 2073, 1026, 3364, 1032, 2068, 221391, 2792, 2793, 1643, 595, 5153, 147, 5424, 653882, 2779, 7157, 351, 5995, 2966, 2780, 1020, 2237, 611, 5956, 7…	2278	138	13528	2.75411	9.55569e-12	5.79536e-14	3.9746e-12
GOTERM_BP_FAT	GO:0051130~positive regulation of cellular component organization	76	3.15091	3.16131e-15	154796, 84634, 685, 5578, 940, 5021, 57534, 3479, 5020, 9700, 2475, 6869, 3481, 387, 253260, 885, 5584, 3630, 723961, 5321, 5588, 5170, 3815, 344, 207, 5364, 1906, 4747, 1908, 64223, 2255, 7248, 7074, 4088, 4221, 4089, 3643, 1814, 5879, 4086, 4087, 4690, 2932, 7476, 8650, 867, 1027, 7472, 1950, 440577, 2069, 81565, 7040, 4803, 10013, 8440, 23327, 4804, 7046, 10733, 9475, 3673, 7014, 7013, 5898, 4…	2278	181	13528	2.49353	1.40821e-11	8.4821e-14	5.85088e-12
GOTERM_BP_FAT	GO:0019725~cellular homeostasis	147	6.09453	3.40273e-15	2147, 2149, 5733, 487, 5021, 6347, 2740, 5020, 6348, 488, 6352, 6869, 6356, 480, 6354, 885, 538, 2150, 886, 887, 5741, 89941, 5745, 3710, 5030, 3091, 1901, 1902, 1903, 477, 5367, 4886, 1906, 1907, 3717, 348, 1909, 540, 6363, 5029, 2847, 1812, 1813, 1814, 1816, 4609, 7201, 56923, 1910, 2769, 10672, 2767, 440577, 51606, 2785, 2068, 728, 7040, 2837, 5348, 623, 6375, 10803, 729230, 23327, 624, 10800,…	2278	466	13528	1.87332	1.55909e-11	9.33698e-14	6.4837e-12
GOTERM_BP_FAT	GO:0051336~regulation of hydrolase activity	116	4.80929	4.45049e-15	84144, 2147, 2149, 6772, 5733, 332, 336, 335, 6869, 253260, 885, 886, 887, 4829, 5745, 1285, 7409, 5030, 1901, 5031, 5032, 1902, 344, 345, 1906, 3717, 1909, 5028, 89846, 64223, 5029, 51764, 1812, 4221, 1813, 1816, 56923, 4609, 1910, 51291, 2769, 5048, 2767, 10672, 5045, 1128, 1129, 81565, 728, 116984, 4091, 64411, 392, 395, 116985, 23620, 2776, 10316, 2779, 10928, 796, 2775, 2280, 54205, 9170, 27…	2278	337	13528	2.04413	2.01172e-11	1.19793e-13	8.35998e-12
GOTERM_BP_FAT	GO:0019216~regulation of lipid metabolic process	55	2.28027	1.23391e-14	55437, 338, 336, 8843, 51083, 335, 2475, 3481, 3630, 723961, 51422, 5321, 672, 476, 5925, 344, 53632, 345, 207, 208, 348, 7410, 51719, 5934, 6777, 6776, 5933, 81617, 1814, 4790, 338442, 9965, 5879, 134, 5140, 10273, 6794, 7040, 5565, 5564, 5563, 5562, 552, 551, 5154, 92335, 5155, 125981, 8660, 2693, 8611, 5571, 3973, 183, 185, 3667, 10451, 998	2278	112	13528	2.91625	5.58253e-11	3.30291e-13	2.32037e-11
GOTERM_BP_FAT	GO:0010604~positive regulation of macromolecule metabolic process	231	9.57711	1.66508e-14	4208, 8881, 941, 6774, 942, 3280, 2002, 940, 54106, 3479, 9861, 336, 3726, 154, 3480, 3481, 64682, 6868, 8878, 253260, 51773, 5741, 79718, 3091, 207, 208, 3718, 3717, 348, 8312, 4221, 6777, 6776, 1814, 6778, 4790, 4792, 4609, 920, 1432, 6500, 7189, 7040, 5347, 4090, 7046, 4093, 4092, 2308, 2309, 324, 10213, 916, 7321, 2965, 55534, 7324, 183, 185, 25913, 7057, 388585, 4855, 4851, 2475, 3624, 983, …	2278	857	13528	1.6007	7.54397e-11	4.43756e-13	3.13638e-11
GOTERM_BP_FAT	GO:0040008~regulation of growth	115	4.76783	2.98152e-14	5950, 6774, 3084, 9241, 3479, 57678, 155, 154, 153, 3481, 6868, 8877, 8879, 10718, 5747, 375790, 1286, 1385, 1081, 207, 4886, 348, 1594, 6696, 728590, 6777, 4221, 6776, 1813, 1814, 55558, 56923, 5617, 8651, 2786, 7040, 2837, 10276, 623, 4803, 7423, 7048, 9021, 10018, 102, 7046, 8548, 137964, 2395, 57142, 29967, 817, 91, 9564, 130399, 23493, 183, 185, 186, 1839, 83737, 3421, 728642, 5781, 6464, 22…	2278	341	13528	2.00273	1.35288e-10	7.91145e-13	5.62439e-11
GOTERM_BP_FAT	GO:0006260~DNA replication	76	3.15091	6.65411e-14	63967, 1763, 7298, 8317, 3479, 8318, 4928, 10926, 5984, 5985, 6117, 10714, 6119, 6118, 81620, 23649, 5928, 5884, 672, 5883, 5981, 5983, 5982, 545, 5931, 651921, 84296, 84126, 5557, 5558, 6241, 51659, 1950, 3364, 57804, 1032, 5422, 286826, 7084, 5111, 29935, 84515, 4173, 5427, 23594, 4172, 4175, 7014, 648152, 7015, 4174, 5155, 5424, 7013, 4176, 5425, 5426, 1017, 9837, 1111, 1736, 642954, 4171, 543…	2278	190	13528	2.37542	3.01256e-10	1.75149e-12	1.25244e-10
GOTERM_BP_FAT	GO:0006917~induction of apoptosis	109	4.51907	7.09447e-14	440917, 9459, 6772, 1392, 25791, 8878, 5741, 1894, 6610, 672, 1285, 8874, 55851, 7409, 3717, 348, 29, 89846, 23263, 7410, 7074, 728590, 472, 7204, 4609, 6753, 6750, 27018, 2071, 51107, 23421, 7189, 2068, 7040, 10276, 83464, 4803, 4804, 10018, 7046, 393, 2309, 91, 916, 5340, 9181, 651610, 203068, 23385, 121512, 7531, 3932, 6655, 4853, 5578, 50649, 9828, 10395, 9826, 3624, 647000, 50650, 84033, 103…	2278	320	13528	2.02282	3.21373e-10	1.85763e-12	1.33604e-10
GOTERM_BP_FAT	GO:0012502~induction of programmed cell death	109	4.51907	8.96017e-14	440917, 9459, 6772, 1392, 25791, 8878, 5741, 1894, 6610, 672, 1285, 8874, 55851, 7409, 3717, 348, 29, 89846, 23263, 7410, 7074, 728590, 472, 7204, 4609, 6753, 6750, 27018, 2071, 51107, 23421, 7189, 2068, 7040, 10276, 83464, 4803, 4804, 10018, 7046, 393, 2309, 91, 916, 5340, 9181, 651610, 203068, 23385, 121512, 7531, 3932, 6655, 4853, 5578, 50649, 9828, 10395, 9826, 3624, 647000, 50650, 84033, 103…	2278	321	13528	2.01651	4.05865e-10	2.33258e-12	1.68732e-10
GOTERM_BP_FAT	GO:0032868~response to insulin stimulus	50	2.07297	9.44131e-14	5950, 6121, 4303, 6772, 6464, 51083, 2475, 3480, 6352, 3481, 1978, 5584, 3630, 723961, 2065, 5588, 5170, 207, 208, 6198, 2887, 7248, 2885, 4160, 1812, 3643, 5319, 5140, 133, 5970, 2931, 10014, 9021, 8503, 8850, 2308, 9734, 9564, 2690, 130399, 8660, 2692, 2693, 10603, 23433, 2549, 3667, 894, 5770, 5295, 4067, 142	2278	100	13528	2.96927	4.27491e-10	2.44282e-12	1.77725e-10
GOTERM_BP_FAT	GO:0006511~ubiquitin-dependent protein catabolic process	89	3.68988	1.30088e-13	8881, 5682, 9861, 51377, 5686, 5685, 5684, 5683, 983, 9491, 10393, 64682, 9101, 5887, 8878, 701, 51529, 7251, 9958, 5708, 5709, 5706, 79718, 5707, 5691, 5704, 5690, 8065, 5705, 5693, 5702, 4193, 5692, 5700, 5695, 5701, 5694, 6502, 5696, 7311, 5687, 5688, 5689, 8454, 728590, 51434, 51433, 29882, 29945, 4085, 5717, 652826, 64750, 5718, 5719, 57154, 8697, 729948, 10273, 5710, 8945, 5711, 7329, 4734,…	2278	242	13528	2.18401	5.89435e-10	3.3491e-12	2.45048e-10
GOTERM_BP_FAT	GO:0032844~regulation of homeostatic process	54	2.23881	1.41939e-13	2147, 805, 2149, 685, 801, 5020, 8843, 3624, 6352, 6869, 6868, 885, 65057, 2067, 5321, 11243, 3091, 632, 1909, 6696, 4160, 6777, 1812, 6776, 1813, 338442, 4609, 5319, 1432, 2072, 7040, 2837, 623, 7422, 552, 553, 4092, 551, 7014, 7013, 2309, 92, 91, 26277, 796, 3375, 54386, 1021, 2280, 3973, 183, 6863, 185, 2829, 25913, 808, 4067, 3932	2278	114	13528	2.81299	6.42746e-10	3.63132e-12	2.67208e-10
GOTERM_BP_FAT	GO:0009314~response to radiation	78	3.23383	1.46042e-13	5950, 842, 2916, 6347, 3861, 3726, 10692, 94233, 10381, 6356, 4157, 261734, 2902, 2067, 2903, 1281, 2652, 653238, 4036, 672, 3815, 6506, 6507, 24, 728458, 478, 477, 7508, 207, 836, 7507, 1233, 408, 4893, 472, 4221, 1812, 1813, 1814, 1816, 4609, 6010, 8243, 3265, 5599, 10874, 1956, 5970, 2072, 3845, 2071, 4734, 2073, 1026, 3364, 1032, 2068, 2792, 7040, 221391, 2793, 4803, 1643, 9021, 595, 5153, 14…	2278	200	13528	2.31603	6.61354e-10	3.71547e-12	2.74947e-10
GOTERM_BP_FAT	GO:0051051~negative regulation of transport	60	2.48756	1.76613e-13	805, 5781, 50852, 5578, 3084, 11255, 2917, 801, 5020, 336, 3625, 335, 154, 3624, 3481, 3630, 723961, 6564, 2065, 4889, 3690, 344, 345, 207, 4886, 1906, 208, 1907, 1908, 3685, 2887, 7200, 1813, 3643, 1814, 4790, 5879, 4792, 134, 9908, 4734, 2931, 1950, 8074, 5715, 3356, 2771, 8622, 7040, 2837, 23327, 10468, 5728, 7529, 130399, 796, 8660, 2775, 2693, 51738, 1020, 3060, 808, 7057	2278	135	13528	2.63935	8.00163e-10	4.4702e-12	3.32656e-10
GOTERM_BP_FAT	GO:0000082~G1/S transition of mitotic cell cycle	35	1.45108	1.77497e-13	4331, 1956, 113130, 8317, 1029, 1027, 1026, 3624, 1032, 10926, 1031, 6868, 29933, 595, 815, 816, 26524, 817, 91, 5426, 818, 8065, 1019, 5925, 1874, 5532, 207, 6502, 5530, 3688, 8454, 993, 5500, 894, 898	2278	56	13528	3.71159	8.04187e-10	4.46776e-12	3.34333e-10
GOTERM_BP_FAT	GO:0016477~cell migration	97	4.02156	2.29849e-13	154796, 284217, 440917, 2335, 6347, 3684, 79902, 335, 7060, 6352, 3676, 6868, 3678, 7804, 1289, 885, 886, 22801, 8879, 5159, 6093, 5747, 8874, 2321, 3091, 9350, 5362, 5364, 1907, 7412, 1908, 3688, 7410, 6608, 3689, 3915, 54820, 6367, 1812, 1813, 23122, 4690, 1910, 5048, 81565, 7040, 6376, 56413, 7424, 8440, 6370, 7046, 8851, 5155, 324, 9564, 796, 6387, 1839, 7531, 7057, 5578, 2683, 3383, 4254, 22…	2278	276	13528	2.0871	1.04107e-09	5.75173e-12	4.32809e-10
GOTERM_BP_FAT	GO:0008283~cell proliferation	135	5.59701	2.45065e-13	10818, 8881, 5950, 942, 29127, 2641, 3084, 29126, 3479, 3684, 335, 10540, 1387, 8326, 887, 4036, 1285, 4035, 2752, 1909, 11004, 54820, 4609, 5931, 10726, 6285, 8556, 8650, 5048, 5045, 22919, 5617, 1128, 10087, 2068, 2069, 81565, 2771, 7040, 7422, 1131, 54331, 7424, 5347, 7423, 5422, 8548, 10411, 8851, 5154, 5155, 699, 4176, 92, 9564, 2779, 8660, 2277, 796, 996, 6387, 2280, 995, 2782, 183, 993, 91…	2278	436	13528	1.83877	1.10997e-09	6.09868e-12	4.61453e-10
GOTERM_BP_FAT	GO:0007264~small GTPase mediated signal transduction	104	4.31177	2.60103e-13	5163, 3479, 335, 150, 5741, 89941, 6093, 4218, 6009, 673, 8874, 345, 1796, 348, 29, 4893, 7410, 7074, 6016, 29984, 1278, 6014, 9908, 1432, 6300, 9886, 2768, 3845, 10672, 53358, 4803, 171177, 10411, 391, 7529, 393, 5899, 392, 5898, 395, 394, 10928, 81876, 1399, 2782, 23433, 5337, 5338, 396, 397, 398, 399, 998, 10125, 6655, 5894, 6464, 55288, 9411, 9826, 50650, 389, 388, 9101, 2247, 387, 57381, 107…	2278	305	13528	2.02495	1.17837e-09	6.43918e-12	4.89886e-10
GOTERM_BP_FAT	GO:0050678~regulation of epithelial cell proliferation	40	1.65837	2.82431e-13	1910, 284217, 1956, 9241, 4851, 11255, 2683, 7249, 2254, 2252, 5617, 3479, 1027, 2069, 1030, 6869, 7040, 7422, 2246, 2247, 7424, 2066, 9500, 657, 2064, 5241, 5320, 324, 3791, 26277, 5607, 3852, 5727, 1909, 1021, 2255, 3915, 4088, 894, 3912	2278	71	13528	3.34566	1.27946e-09	6.95355e-12	5.31919e-10
GOTERM_BP_FAT	GO:0000079~regulation of cyclin-dependent protein kinase activity	34	1.40962	3.09733e-13	4331, 1956, 1029, 1027, 1026, 1032, 1030, 6868, 1031, 595, 8851, 5728, 26524, 11140, 1111, 9088, 324, 207, 836, 2965, 9134, 1022, 995, 993, 9113, 990, 5500, 904, 4221, 894, 29882, 905, 1163, 896	2278	54	13528	3.73908	1.40318e-09	7.58471e-12	5.83356e-10
GOTERM_BP_FAT	GO:0007346~regulation of mitotic cell cycle	64	2.6534	5.08137e-13	8881, 4303, 685, 940, 332, 3479, 8841, 983, 9700, 10393, 3481, 8525, 8877, 701, 3630, 723961, 81620, 5588, 5884, 4193, 5925, 1906, 9735, 1908, 472, 4751, 4088, 6777, 55055, 6776, 1814, 3643, 4085, 4609, 11130, 8697, 1956, 1029, 1950, 3364, 26574, 2069, 7040, 1030, 1543, 4091, 595, 8379, 890, 11065, 7013, 699, 817, 9088, 1017, 324, 26271, 1062, 7157, 351, 9183, 995, 651610, 990, 9184, 10783, 998	2278	152	13528	2.50044	2.30192e-09	1.23759e-11	9.5699e-10
GOTERM_BP_FAT	GO:0000075~cell cycle checkpoint	46	1.90713	6.36029e-13	8243, 651921, 11130, 11200, 4303, 5781, 1432, 84126, 332, 1029, 2071, 8318, 3364, 983, 2068, 1030, 7040, 8525, 701, 1642, 595, 8379, 81620, 648152, 890, 7013, 699, 672, 5884, 5883, 1111, 80254, 324, 5925, 3014, 1062, 7508, 7157, 9735, 9183, 9134, 651610, 990, 5810, 545, 9184, 472, 55055, 4085	2278	91	13528	3.0019	2.88129e-09	1.5408e-11	1.19785e-09
GOTERM_BP_FAT	GO:0006289~nucleotide-excision repair	34	1.40962	6.49646e-13	4331, 2072, 2071, 2073, 57804, 2068, 5984, 5985, 5887, 6117, 1643, 10714, 6119, 5111, 6118, 1642, 5427, 2067, 653238, 5424, 5425, 5426, 5981, 5983, 5982, 7508, 7507, 7157, 2966, 2965, 1022, 3978, 2968, 902, 2967	2278	55	13528	3.6711	2.94265e-09	1.56524e-11	1.22337e-09
GOTERM_BP_FAT	GO:0009628~response to abiotic stimulus	118	4.89221	6.83697e-13	5950, 6772, 6347, 3861, 5020, 6870, 155, 10692, 3726, 154, 153, 6869, 6356, 1281, 2652, 6610, 4036, 672, 5170, 24, 728458, 478, 207, 477, 5367, 408, 4893, 472, 1812, 1277, 4221, 7200, 1813, 1814, 1816, 4609, 6010, 8243, 6750, 10874, 5970, 2072, 2071, 3845, 2073, 2068, 7040, 2792, 221391, 2793, 4803, 1643, 7048, 4804, 9021, 624, 7046, 595, 5153, 5424, 10886, 2779, 796, 3014, 2966, 491, 2780, 65161…	2278	368	13528	1.90421	3.09705e-09	1.63866e-11	1.28755e-09
GOTERM_BP_FAT	GO:0031644~regulation of neurological system process	64	2.6534	7.23819e-13	2913, 84634, 2918, 2149, 5021, 6347, 5020, 2911, 154, 6869, 5327, 885, 2066, 2902, 2903, 2904, 2905, 2906, 1286, 3815, 4889, 6507, 5367, 1906, 7311, 348, 3351, 1908, 5590, 4893, 728590, 1812, 1813, 1814, 1816, 134, 135, 1910, 3265, 1742, 10874, 1956, 5664, 3845, 3908, 3356, 2771, 3358, 4803, 552, 551, 3673, 815, 653882, 5566, 2773, 5532, 6233, 5530, 491, 1020, 3060, 183, 6863, 7532, 4915	2278	153	13528	2.4841	3.27911e-09	1.72585e-11	1.36324e-09
GOTERM_BP_FAT	GO:0032103~positive regulation of response to external stimulus	37	1.534	8.87028e-13	136, 4852, 5578, 81565, 6352, 7040, 6868, 6376, 7422, 2150, 102, 3576, 3673, 5155, 5320, 5321, 3791, 4889, 1901, 1907, 2693, 3717, 51738, 1909, 1233, 1594, 1908, 6387, 718, 6863, 2255, 183, 185, 4088, 6777, 6776, 653879, 7057	2278	64	13528	3.43322	4.01842e-09	2.10388e-11	1.6706e-09
GOTERM_BP_FAT	GO:0051094~positive regulation of developmental process	96	3.9801	1.01377e-12	154796, 338, 941, 942, 3084, 685, 5021, 5020, 154, 3726, 6352, 60436, 3481, 8877, 51564, 7483, 8399, 3091, 207, 5364, 3717, 1594, 6608, 7074, 6777, 4221, 1813, 6776, 4790, 9365, 4023, 1432, 5970, 8650, 81565, 7040, 2837, 4803, 7424, 4090, 4804, 9021, 7048, 4093, 93, 2309, 92, 91, 324, 2778, 796, 23493, 7050, 182, 183, 185, 396, 898, 7057, 5578, 4851, 2683, 2254, 3624, 4254, 388, 387, 2247, 3630, …	2278	278	13528	2.05072	4.59226e-09	2.39181e-11	1.90916e-09
GOTERM_BP_FAT	GO:0001932~regulation of protein amino acid phosphorylation	69	2.8607	1.24357e-12	2147, 941, 5578, 5577, 3479, 335, 2475, 80310, 3481, 6868, 4254, 2247, 253260, 885, 3630, 723961, 51422, 5580, 5159, 5581, 1906, 3717, 1909, 64223, 5590, 3689, 8312, 4221, 4089, 3643, 1910, 920, 1956, 5664, 56034, 8651, 1950, 7040, 6850, 623, 5515, 7424, 5518, 9021, 624, 7046, 4092, 4091, 659, 595, 10411, 657, 5154, 5155, 92, 4724, 916, 2690, 650, 2280, 2549, 2688, 183, 5573, 5576, 5575, 894, 110…	2278	173	13528	2.36855	5.63333e-09	2.91882e-11	2.34197e-09
GOTERM_BP_FAT	GO:0000718~nucleotide-excision repair, DNA damage removal	20	0.829187	1.70442e-12	2067, 4331, 653238, 2072, 2071, 2073, 7508, 7507, 2068, 2966, 2965, 1022, 5887, 6117, 1643, 6119, 6118, 2968, 1642, 902, 2967	2278	22	13528	5.39868	7.721e-09	3.97989e-11	3.20989e-09
GOTERM_BP_FAT	GO:0008015~blood circulation	72	2.98507	2.11047e-12	154796, 3627, 2642, 6772, 4852, 11255, 5021, 3827, 5020, 6870, 156, 155, 154, 153, 6869, 5540, 680, 5443, 4922, 54567, 1285, 476, 477, 5367, 4886, 1906, 1585, 1584, 1907, 348, 1909, 1908, 10911, 1813, 1814, 1278, 1816, 5125, 134, 135, 1910, 133, 136, 5664, 7472, 6846, 2784, 3363, 3357, 2837, 623, 7422, 4090, 624, 552, 553, 551, 659, 3672, 146, 147, 817, 797, 1874, 796, 6387, 719, 183, 6863, 185, …	2278	186	13528	2.29879	9.56022e-09	4.90268e-11	3.97452e-09
GOTERM_BP_FAT	GO:0003013~circulatory system process	72	2.98507	2.11047e-12	154796, 3627, 2642, 6772, 4852, 11255, 5021, 3827, 5020, 6870, 156, 155, 154, 153, 6869, 5540, 680, 5443, 4922, 54567, 1285, 476, 477, 5367, 4886, 1906, 1585, 1584, 1907, 348, 1909, 1908, 10911, 1813, 1814, 1278, 1816, 5125, 134, 135, 1910, 133, 136, 5664, 7472, 6846, 2784, 3363, 3357, 2837, 623, 7422, 4090, 624, 552, 553, 551, 659, 3672, 146, 147, 817, 797, 1874, 796, 6387, 719, 183, 6863, 185, …	2278	186	13528	2.29879	9.56022e-09	4.90268e-11	3.97452e-09
GOTERM_BP_FAT	GO:0006928~cell motion	141	5.84577	2.40237e-12	154796, 338, 6774, 284217, 440917, 2335, 3479, 6347, 6348, 3683, 3684, 79902, 335, 7060, 3676, 6352, 6351, 150, 6868, 480, 3678, 7804, 9148, 1289, 885, 886, 22801, 8879, 5159, 6093, 5747, 8399, 8874, 3091, 2321, 9350, 5362, 5364, 3717, 1907, 1908, 7412, 3688, 6608, 7410, 3689, 3915, 6367, 54820, 25970, 728590, 1812, 23122, 1813, 55558, 4690, 1910, 1432, 5048, 10672, 81565, 7040, 6376, 56413, 7424…	2278	475	13528	1.76281	1.08829e-08	5.55251e-11	4.52441e-09
GOTERM_BP_FAT	GO:0008543~fibroblast growth factor receptor signaling pathway	23	0.953566	4.00832e-12	9365, 26281, 10818, 27006, 2263, 2254, 2253, 2252, 2264, 2251, 2250, 8074, 2261, 2260, 2248, 9702, 8817, 8822, 2249, 2255, 2246, 2247, 10817	2278	29	13528	4.70988	1.81578e-08	9.21717e-11	7.54884e-09
GOTERM_BP_FAT	GO:0007219~Notch signaling pathway	32	1.3267	4.15134e-12	1272, 4855, 4854, 4853, 3084, 4851, 92737, 5664, 57534, 23462, 51107, 6868, 3516, 83464, 1840, 113878, 102, 9794, 3714, 84441, 54567, 55851, 26508, 23493, 23509, 351, 28514, 182, 55534, 23385, 23220, 142678	2278	52	13528	3.65449	1.88056e-08	9.49778e-11	7.81815e-09
GOTERM_BP_FAT	GO:0007223~Wnt receptor signaling pathway, calcium modulating pathway	19	0.787728	8.81561e-12	7484, 89780, 7471, 7483, 7476, 7477, 7478, 7479, 7472, 7482, 7481, 7473, 7474, 7480, 51384, 7475, 54361, 80326, 2535	2278	21	13528	5.37297	3.99347e-08	2.00677e-10	1.66023e-08
GOTERM_BP_FAT	GO:0032869~cellular response to insulin stimulus	37	1.534	9.94647e-12	5140, 6121, 4303, 6772, 6464, 2931, 10014, 3480, 3481, 1978, 723961, 3630, 5584, 8503, 2065, 2308, 8850, 9734, 5170, 9564, 2690, 8660, 2692, 207, 208, 2693, 10603, 2887, 23433, 2549, 2885, 1812, 3667, 894, 5770, 3643, 5295, 142, 5319	2278	68	13528	3.23127	4.50576e-08	2.25288e-10	1.8732e-08
GOTERM_BP_FAT	GO:0006275~regulation of DNA replication	35	1.45108	1.00965e-11	651921, 3265, 1763, 6464, 56034, 3479, 8318, 3364, 3480, 2069, 3481, 7040, 4254, 5515, 5518, 7270, 723961, 3630, 65057, 5111, 7014, 81620, 5154, 648152, 5155, 5156, 7013, 5884, 5883, 1017, 26277, 51053, 7157, 3060, 990, 25913, 545, 3643, 5319	2278	62	13528	3.3524	4.5737e-08	2.27548e-10	1.90145e-08
GOTERM_BP_FAT	GO:0010605~negative regulation of macromolecule metabolic process	195	8.08458	1.02034e-11	4208, 8881, 6774, 3280, 440917, 3084, 9861, 8318, 3481, 8321, 64682, 1978, 6498, 65057, 51773, 6497, 79718, 51160, 2, 545, 4221, 1814, 4790, 4609, 51592, 7329, 55869, 7040, 623, 624, 23112, 4092, 4091, 648152, 10213, 10076, 7050, 7321, 7324, 9184, 25913, 1839, 83933, 7057, 388585, 27161, 50852, 3625, 8841, 3624, 9491, 2247, 701, 51529, 7251, 9612, 9611, 5708, 5709, 5706, 5707, 5704, 5705, 5702, 5…	2278	734	13528	1.57768	4.62214e-08	2.28819e-10	1.92158e-08
GOTERM_BP_FAT	GO:0007611~learning or memory	50	2.07297	1.26176e-11	2914, 6285, 114, 3265, 23236, 8516, 1742, 5578, 5577, 11255, 2917, 5664, 5021, 3845, 5048, 53358, 2740, 5020, 1392, 3356, 8484, 6869, 8811, 4803, 8326, 3678, 107, 5582, 2902, 2903, 5728, 5153, 2904, 147, 2925, 653882, 3815, 478, 477, 351, 1020, 6198, 5590, 4893, 6863, 5575, 1812, 2534, 1813, 1814, 1816	2278	111	13528	2.67502	5.71576e-08	2.81565e-10	2.37624e-08
GOTERM_BP_FAT	GO:0048870~cell motility	100	4.14594	1.66837e-11	154796, 338, 284217, 440917, 2335, 6347, 3684, 79902, 335, 7060, 3676, 6352, 6868, 480, 3678, 7804, 9148, 1289, 885, 886, 22801, 8879, 5159, 6093, 5747, 8874, 3091, 2321, 9350, 5362, 5364, 1907, 7412, 1908, 3688, 6608, 7410, 3689, 3915, 6367, 54820, 1812, 23122, 1813, 4690, 1910, 5048, 81565, 7040, 6376, 56413, 7424, 8440, 6370, 7046, 8851, 5155, 324, 9564, 796, 6387, 1839, 7531, 7057, 5578, 2683…	2278	307	13528	1.93438	7.55775e-08	3.70478e-10	3.14202e-08
GOTERM_BP_FAT	GO:0051674~localization of cell	100	4.14594	1.66837e-11	154796, 338, 284217, 440917, 2335, 6347, 3684, 79902, 335, 7060, 3676, 6352, 6868, 480, 3678, 7804, 9148, 1289, 885, 886, 22801, 8879, 5159, 6093, 5747, 8874, 3091, 2321, 9350, 5362, 5364, 1907, 7412, 1908, 3688, 6608, 7410, 3689, 3915, 6367, 54820, 1812, 23122, 1813, 4690, 1910, 5048, 81565, 7040, 6376, 56413, 7424, 8440, 6370, 7046, 8851, 5155, 324, 9564, 796, 6387, 1839, 7531, 7057, 5578, 2683…	2278	307	13528	1.93438	7.55775e-08	3.70478e-10	3.14202e-08
GOTERM_BP_FAT	GO:0009967~positive regulation of signal transduction	97	4.02156	1.9058e-11	941, 2149, 3479, 2099, 155, 154, 4615, 3481, 6868, 253260, 5741, 1894, 7483, 2321, 3091, 1902, 3717, 1594, 64223, 4893, 8312, 4221, 1814, 920, 5970, 3845, 5045, 5617, 7189, 2069, 7040, 7422, 9218, 10013, 23118, 7046, 93, 92, 91, 916, 2280, 182, 9170, 183, 3932, 7057, 2914, 5781, 4853, 50852, 8767, 2254, 2475, 389, 387, 3630, 723961, 11251, 2064, 2065, 6453, 27032, 3815, 57521, 2719, 5494, 2255, 4…	2278	295	13528	1.95267	8.63326e-08	4.21135e-10	3.58915e-08
GOTERM_BP_FAT	GO:0051046~regulation of secretion	74	3.06799	2.24044e-11	5950, 84634, 2918, 5781, 2641, 685, 3084, 5578, 2917, 11255, 5021, 2683, 5020, 336, 3625, 1392, 156, 8843, 335, 3624, 6869, 3481, 2247, 3630, 723961, 8399, 2904, 2065, 5588, 4889, 1385, 4886, 1906, 1907, 3717, 1908, 3351, 7200, 1813, 1814, 338442, 5319, 134, 135, 5140, 10874, 136, 1950, 8074, 5715, 3356, 7189, 7040, 8622, 3358, 2837, 6850, 4803, 7424, 10468, 552, 553, 551, 815, 130399, 2692, 2691…	2278	202	13528	2.17551	1.01492e-07	4.9268e-10	4.21938e-08
GOTERM_BP_FAT	GO:0007266~Rho protein signal transduction	26	1.07794	2.25786e-11	2768, 10672, 9411, 9826, 335, 50650, 150, 727758, 388, 387, 57381, 5741, 6093, 4650, 391, 393, 392, 395, 394, 345, 348, 9138, 396, 397, 29984, 398, 1278	2278	38	13528	4.06321	1.02281e-07	4.94112e-10	4.25218e-08
GOTERM_BP_FAT	GO:0040014~regulation of multicellular organism growth	34	1.40962	3.3412e-11	5781, 6774, 3479, 5617, 57678, 155, 154, 7253, 153, 8879, 137964, 2395, 51052, 2690, 1385, 130399, 2692, 5727, 2691, 207, 4886, 348, 2693, 351, 5290, 51738, 2688, 183, 4160, 6777, 6776, 1813, 1814, 56923	2278	61	13528	3.31001	1.51356e-07	7.27673e-10	6.2924e-08
GOTERM_BP_FAT	GO:0007205~activation of protein kinase C activity by G-protein coupled receptor protein signaling pathway	25	1.03648	3.73532e-11	135, 2149, 1609, 1607, 1608, 56848, 1128, 1606, 623, 9162, 8525, 8526, 8877, 1154, 885, 8527, 160851, 4035, 1906, 1907, 1909, 8611, 3060, 56288, 139189	2278	36	13528	4.12399	1.6921e-07	8.09618e-10	7.03466e-08
GOTERM_BP_FAT	GO:0051969~regulation of transmission of nerve impulse	59	2.4461	4.66782e-11	2913, 84634, 2918, 5021, 6347, 5020, 2911, 6869, 5327, 2066, 2902, 2903, 2904, 2905, 1286, 3815, 4889, 6507, 5367, 1906, 7311, 348, 3351, 1908, 5590, 4893, 728590, 1812, 1813, 1814, 1816, 134, 135, 3265, 1742, 10874, 1956, 5664, 3845, 3908, 3356, 2771, 3358, 4803, 552, 551, 3673, 815, 653882, 5566, 2773, 5532, 6233, 5530, 491, 1020, 3060, 183, 6863, 7532, 4915	2278	147	13528	2.3835	2.11452e-07	1.00692e-09	8.79081e-08
GOTERM_BP_FAT	GO:0000226~microtubule cytoskeleton organization	59	2.4461	4.66782e-11	11190, 10403, 85378, 8841, 54908, 647000, 10540, 9700, 9493, 9148, 701, 9793, 5116, 5747, 9611, 84643, 7283, 672, 9738, 10376, 4747, 5590, 11004, 27229, 4751, 54820, 8243, 11130, 5108, 5048, 25777, 7472, 10426, 440577, 55722, 6790, 1499, 667, 114791, 81565, 55835, 9126, 1069, 8481, 10844, 81027, 11065, 4869, 81930, 80254, 11116, 26271, 1778, 9183, 57405, 1058, 9662, 203068, 81929, 23332, 55142	2278	147	13528	2.3835	2.11452e-07	1.00692e-09	8.79081e-08
GOTERM_BP_FAT	GO:0050804~regulation of synaptic transmission	56	2.32172	4.78921e-11	2913, 84634, 2918, 5021, 6347, 5020, 2911, 6869, 5327, 2066, 2902, 2903, 2904, 2905, 1286, 4889, 3815, 6507, 5367, 1906, 7311, 348, 3351, 1908, 4893, 5590, 728590, 1812, 1813, 1814, 1816, 134, 135, 3265, 1742, 10874, 1956, 5664, 3845, 3908, 3356, 2771, 3358, 4803, 815, 653882, 5566, 2773, 5532, 6233, 5530, 491, 1020, 3060, 183, 6863, 7532, 4915	2278	136	13528	2.44528	2.16951e-07	1.02821e-09	9.01943e-08
GOTERM_BP_FAT	GO:0033043~regulation of organelle organization	77	3.19237	5.01818e-11	154796, 8881, 220134, 84634, 685, 940, 7249, 11190, 3479, 10395, 9700, 2475, 729012, 10393, 79959, 6869, 3481, 387, 253260, 65057, 3630, 723961, 2067, 5321, 5588, 672, 1901, 1906, 5921, 1908, 64223, 7248, 9113, 4751, 472, 4088, 4221, 23122, 3643, 1814, 5879, 4085, 4609, 4690, 8697, 7514, 2072, 22919, 1027, 7472, 1950, 440577, 667, 1499, 2069, 348235, 10013, 8440, 10733, 9475, 7014, 5154, 7013, 69…	2278	217	13528	2.10722	2.27323e-07	1.07228e-09	9.45063e-08
GOTERM_BP_FAT	GO:0051241~negative regulation of multicellular organismal process	63	2.61194	8.41928e-11	5950, 2147, 5578, 9241, 4851, 3827, 487, 5020, 1392, 156, 155, 335, 154, 3624, 488, 153, 3481, 6868, 3630, 723961, 51564, 4889, 476, 344, 345, 477, 5367, 1906, 3717, 348, 3351, 1812, 1813, 4790, 1816, 134, 133, 136, 5045, 8074, 3356, 2771, 2837, 7422, 7048, 4804, 552, 551, 659, 2395, 5154, 146, 5155, 796, 2773, 3375, 5727, 5054, 2693, 5340, 51738, 3060, 6863, 186, 7057	2278	164	13528	2.28127	3.81393e-07	1.79058e-09	1.58559e-07
GOTERM_BP_FAT	GO:0007178~transmembrane receptor protein serine/threonine kinase signaling pathway	46	1.90713	1.31575e-10	64750, 57154, 9241, 10273, 8928, 6347, 25805, 7040, 8239, 4090, 10468, 7048, 6497, 7046, 3654, 4093, 4092, 4091, 659, 1281, 657, 658, 5154, 5155, 93, 92, 91, 91851, 9350, 1385, 2488, 650, 151742, 9372, 409, 7321, 2280, 64388, 11167, 7323, 9765, 4088, 4089, 1278, 4086, 4087	2278	103	13528	2.65216	5.96035e-07	2.78521e-09	2.47793e-07
GOTERM_BP_FAT	GO:0009060~aerobic respiration	24	0.995025	1.49721e-10	3420, 1743, 23530, 5162, 1431, 283398, 727947, 2271, 6392, 3419, 6390, 3418, 6391, 4512, 2395, 4191, 440567, 7381, 6389, 8802, 8803, 8801, 7388, 3421, 7385, 50, 7384	2278	35	13528	4.07214	6.78236e-07	3.15459e-09	2.81967e-07
GOTERM_BP_FAT	GO:0007229~integrin-mediated signaling pathway	36	1.49254	1.57071e-10	8515, 8516, 9846, 3680, 3683, 3684, 3681, 3682, 667, 3676, 3675, 3674, 6850, 3679, 3696, 3678, 22801, 102, 3655, 5747, 1281, 3673, 3672, 55914, 7409, 9564, 3690, 3691, 3693, 3694, 3695, 3685, 3688, 3687, 3689, 10451	2278	70	13528	3.05411	7.11529e-07	3.29412e-09	2.95808e-07
GOTERM_BP_FAT	GO:0008217~regulation of blood pressure	45	1.86567	1.58901e-10	134, 1910, 2642, 4852, 11255, 5021, 5020, 2784, 6870, 155, 154, 153, 6869, 2837, 623, 680, 624, 552, 553, 5443, 551, 659, 146, 147, 476, 796, 477, 5367, 4886, 1585, 1906, 1584, 1907, 1908, 6863, 183, 10911, 185, 186, 347148, 1813, 1814, 1278, 1816, 5125	2278	100	13528	2.67234	7.1982e-07	3.31714e-09	2.99254e-07
GOTERM_BP_FAT	GO:0050795~regulation of behavior	28	1.16086	1.67955e-10	5578, 6870, 1392, 7040, 2837, 6868, 7422, 2150, 102, 3576, 3673, 5155, 1901, 3791, 2691, 5367, 1907, 51738, 1908, 6387, 1233, 2255, 3350, 4088, 1812, 347148, 1814, 7057	2278	46	13528	3.61477	7.60835e-07	3.49007e-09	3.16306e-07
GOTERM_BP_FAT	GO:0034199~activation of protein kinase A activity	16	0.66335	2.29383e-10	114, 115, 112, 113, 5577, 111, 5566, 5567, 5568, 196883, 109, 5573, 108, 5576, 5575, 107	2278	17	13528	5.58922	1.03911e-06	4.74478e-09	4.31993e-07
GOTERM_BP_FAT	GO:0006297~nucleotide-excision repair, DNA gap filling	16	0.66335	2.29383e-10	5427, 5424, 5425, 5426, 5981, 5983, 5982, 57804, 5984, 3978, 5985, 6117, 6119, 10714, 5111, 6118	2278	17	13528	5.58922	1.03911e-06	4.74478e-09	4.31993e-07
GOTERM_BP_FAT	GO:0006954~inflammatory response	101	4.1874	2.62525e-10	2147, 6774, 2149, 5733, 6349, 54106, 2335, 6347, 6348, 3683, 336, 1392, 51083, 59340, 4615, 6352, 6869, 3481, 6351, 6356, 6354, 414062, 30814, 3091, 8111, 1903, 207, 3694, 6361, 2, 6364, 6363, 6366, 6696, 3689, 6367, 6777, 4790, 6360, 9365, 5970, 10014, 7040, 727, 623, 4803, 6373, 6372, 6370, 729230, 624, 1269, 10800, 11343, 9759, 719, 718, 26279, 2829, 83737, 7057, 3627, 2919, 60675, 2683, 8767,…	2278	325	13528	1.84552	1.18924e-06	5.40562e-09	4.94407e-07
GOTERM_BP_FAT	GO:0051302~regulation of cell division	28	1.16086	3.31512e-10	805, 84432, 685, 801, 56034, 2254, 2253, 2252, 2251, 2250, 80310, 2069, 2248, 7040, 3481, 2249, 2246, 7422, 2247, 1069, 7424, 7423, 3630, 723961, 5154, 5155, 324, 2277, 9738, 5473, 4221, 808	2278	47	13528	3.53786	1.50175e-06	6.79524e-09	6.24329e-07
GOTERM_BP_FAT	GO:0051781~positive regulation of cell division	25	1.03648	4.4529e-10	84432, 685, 56034, 2254, 2253, 2252, 2251, 2250, 80310, 2069, 2248, 7040, 3481, 2249, 2246, 7422, 2247, 7424, 7423, 3630, 723961, 5154, 5155, 324, 2277, 5473, 4221	2278	39	13528	3.80676	2.01716e-06	9.08632e-09	8.38605e-07
GOTERM_BP_FAT	GO:0014070~response to organic cyclic substance	50	2.07297	5.10488e-10	2912, 6774, 5578, 6772, 11255, 5021, 5020, 156, 6870, 3726, 6869, 2902, 5588, 1909, 3351, 6198, 1812, 1813, 7200, 1814, 1816, 135, 5970, 1026, 5520, 1499, 1030, 7040, 3358, 4803, 9021, 7048, 1543, 7046, 551, 595, 5728, 3673, 147, 2690, 5727, 2775, 2774, 1020, 2280, 6863, 894, 3066, 898, 4067	2278	121	13528	2.45394	2.31251e-06	1.037e-08	9.61392e-07
GOTERM_BP_FAT	GO:0032101~regulation of response to external stimulus	60	2.48756	5.63513e-10	2147, 2149, 5578, 4852, 3827, 10203, 154, 2475, 6352, 3481, 6868, 885, 2150, 3630, 723961, 3576, 2902, 5320, 5321, 3791, 1901, 4889, 1906, 3717, 348, 1907, 1909, 1233, 2, 1594, 1908, 2255, 6696, 4088, 1812, 6777, 6776, 1813, 1814, 134, 135, 136, 81565, 7040, 6376, 7422, 7048, 102, 3673, 5154, 5155, 5054, 2693, 5340, 51738, 6387, 1215, 718, 183, 6863, 185, 7057, 653879	2278	159	13528	2.24096	2.55271e-06	1.1396e-08	1.06125e-06
GOTERM_BP_FAT	GO:0060341~regulation of cellular localization	82	3.39967	5.91031e-10	5950, 805, 84634, 2918, 5781, 2641, 5578, 801, 2917, 11255, 5021, 2683, 5020, 3625, 336, 1392, 156, 8843, 335, 3624, 3481, 2247, 387, 3630, 723961, 2904, 5588, 4889, 1385, 4886, 1906, 1907, 3717, 1908, 3351, 6608, 4088, 7200, 4089, 1813, 1814, 338442, 4792, 5319, 134, 135, 5140, 9908, 10874, 136, 2932, 1029, 4734, 1950, 8074, 5715, 3356, 7189, 3358, 7040, 8622, 6850, 4803, 7424, 10468, 552, 7046,…	2278	248	13528	1.96355	2.67737e-06	1.18994e-08	1.11308e-06
GOTERM_BP_FAT	GO:0048520~positive regulation of behavior	23	0.953566	5.9156e-10	3673, 5155, 5578, 1901, 3791, 1392, 2691, 5367, 1907, 51738, 1233, 6387, 1908, 7040, 2837, 6868, 7422, 2255, 4088, 2150, 102, 7057, 3576	2278	34	13528	4.01725	2.67976e-06	1.18574e-08	1.11407e-06
GOTERM_BP_FAT	GO:0043406~positive regulation of MAP kinase activity	44	1.82421	1.31896e-09	2914, 10818, 84432, 5781, 2357, 136, 6464, 1956, 60675, 3845, 1950, 2911, 2785, 3356, 728, 150, 7040, 4254, 727, 151, 6850, 2247, 5562, 7852, 2064, 3672, 5155, 5604, 653882, 3815, 2690, 1902, 23566, 9294, 1906, 51738, 5291, 1908, 9170, 2549, 2688, 3643, 121512, 7057, 5319	2278	102	13528	2.56172	5.97487e-06	2.63211e-08	2.48397e-06
GOTERM_BP_FAT	GO:0010564~regulation of cell cycle process	47	1.94859	1.97457e-09	8881, 8697, 7514, 685, 940, 8317, 332, 1029, 3479, 1950, 440577, 9700, 10393, 79959, 2069, 3481, 7040, 51343, 5139, 723961, 3630, 1543, 10733, 9475, 4091, 81620, 11065, 7013, 699, 5588, 672, 817, 4869, 9088, 324, 5925, 26271, 1062, 1906, 9735, 9183, 1908, 995, 651610, 4751, 472, 1814, 3643, 4085, 10783, 998	2278	114	13528	2.44835	8.94475e-06	3.92315e-08	3.71866e-06
GOTERM_BP_FAT	GO:0048545~response to steroid hormone stimulus	67	2.77778	2.24647e-09	6774, 5578, 5021, 6347, 5020, 2099, 336, 6870, 51083, 3726, 6352, 7252, 8835, 1583, 2066, 2064, 5321, 672, 5604, 4886, 4747, 1594, 3351, 2, 6198, 6696, 6777, 1277, 7200, 3643, 5594, 6750, 133, 2033, 5970, 3845, 8651, 7472, 1026, 1499, 6790, 3949, 7040, 4803, 9021, 7048, 552, 7046, 595, 5728, 6714, 5154, 890, 5155, 5156, 799, 2690, 2692, 5727, 2796, 10076, 51738, 2688, 894, 6382, 898, 7057	2278	192	13528	2.0723	1.01765e-05	4.44389e-08	4.23073e-06
GOTERM_BP_FAT	GO:0043069~negative regulation of programmed cell death	106	4.39469	2.24929e-09	4208, 55437, 2149, 685, 3084, 332, 3479, 6347, 2099, 4615, 3480, 3481, 6868, 8878, 8877, 6093, 1280, 673, 3551, 207, 122042, 348, 6608, 4893, 84335, 728590, 472, 6777, 6776, 4790, 4792, 4609, 1910, 5618, 5970, 3845, 5045, 2073, 5046, 440577, 2068, 7189, 7422, 4803, 5139, 4804, 9021, 624, 7046, 4091, 2308, 324, 2796, 651610, 183, 396, 7057, 4853, 60675, 4851, 8767, 8841, 983, 8835, 2249, 387, 5584…	2278	359	13528	1.75344	1.01892e-05	4.43013e-08	4.23605e-06
GOTERM_BP_FAT	GO:0046356~acetyl-CoA catabolic process	18	0.746269	2.39465e-09	3420, 1743, 23530, 1431, 5162, 4191, 283398, 2271, 6389, 6392, 8802, 8803, 6390, 3419, 8801, 3418, 6391, 3421, 50	2278	23	13528	4.64756	1.08477e-05	4.696e-08	4.50979e-06
GOTERM_BP_FAT	GO:0006099~tricarboxylic acid cycle	18	0.746269	2.39465e-09	3420, 1743, 23530, 1431, 5162, 4191, 283398, 2271, 6389, 6392, 8802, 8803, 6390, 3419, 8801, 3418, 6391, 3421, 50	2278	23	13528	4.64756	1.08477e-05	4.696e-08	4.50979e-06
GOTERM_BP_FAT	GO:0007218~neuropeptide signaling pathway	41	1.69983	2.43185e-09	6752, 84658, 6751, 129521, 10874, 4852, 60675, 51083, 8620, 8484, 5368, 4985, 6866, 4828, 2832, 5443, 30817, 976, 5179, 5173, 10886, 2015, 64106, 10316, 2922, 5367, 4886, 22986, 4887, 3060, 6863, 2847, 2587, 347148, 283869, 594857, 3061, 3062, 256933, 56923, 113091	2278	93	13528	2.61807	1.10162e-05	4.74839e-08	4.57985e-06
GOTERM_BP_FAT	GO:0060548~negative regulation of cell death	106	4.39469	2.66098e-09	4208, 55437, 2149, 685, 3084, 332, 3479, 6347, 2099, 4615, 3480, 3481, 6868, 8878, 8877, 6093, 1280, 673, 3551, 207, 122042, 348, 6608, 4893, 84335, 728590, 472, 6777, 6776, 4790, 4792, 4609, 1910, 5618, 5970, 3845, 5045, 2073, 5046, 440577, 2068, 7189, 7422, 4803, 5139, 4804, 9021, 624, 7046, 4091, 2308, 324, 2796, 651610, 183, 396, 7057, 4853, 60675, 4851, 8767, 8841, 983, 8835, 2249, 387, 5584…	2278	360	13528	1.74857	1.20542e-05	5.1735e-08	5.01138e-06
GOTERM_BP_FAT	GO:0030879~mammary gland development	32	1.3267	2.88846e-09	4855, 5618, 3084, 2683, 5021, 3479, 5617, 7472, 3480, 7040, 9148, 10018, 10718, 2066, 137964, 3673, 89780, 2064, 2065, 5241, 5744, 1385, 8660, 2692, 5727, 5367, 540, 491, 59350, 3667, 6777, 6776	2278	63	13528	3.0164	1.30846e-05	5.59176e-08	5.43977e-06
GOTERM_BP_FAT	GO:0046058~cAMP metabolic process	17	0.704809	3.43467e-09	5151, 135, 5140, 114, 115, 133, 112, 5744, 113, 5144, 111, 196883, 8622, 109, 108, 107, 5741	2278	21	13528	4.80739	1.55589e-05	6.62087e-08	6.46844e-06
GOTERM_BP_FAT	GO:0010648~negative regulation of cell communication	80	3.31675	3.51898e-09	5578, 9241, 2254, 7249, 8841, 156, 10395, 155, 154, 2475, 8835, 8525, 1154, 6498, 6497, 9146, 5580, 9611, 2065, 653238, 9306, 4035, 4889, 9350, 207, 5367, 3351, 1592, 5590, 2887, 7248, 8312, 340665, 84335, 54361, 4221, 1812, 1813, 1814, 1816, 4792, 56603, 134, 5140, 57154, 51592, 5970, 10272, 8651, 2931, 3356, 2771, 5516, 5515, 5518, 7088, 9021, 4804, 552, 4092, 4091, 64411, 551, 595, 5728, 23592…	2278	248	13528	1.91566	1.59409e-05	6.75465e-08	6.62722e-06
GOTERM_BP_FAT	GO:0007017~microtubule-based process	81	3.35821	4.09821e-09	11258, 7846, 55288, 11190, 10403, 85378, 8841, 54908, 9700, 647000, 10540, 10382, 10383, 10381, 9493, 9148, 701, 4157, 9793, 89941, 5116, 9611, 5747, 84643, 7280, 7283, 672, 5604, 27175, 9738, 10376, 4747, 5590, 11004, 27229, 54820, 4751, 113457, 8243, 11130, 5108, 347733, 5048, 25777, 7472, 10426, 440577, 55722, 667, 1499, 6790, 8655, 114791, 7278, 81565, 55835, 9126, 7277, 1069, 84790, 3796, 10…	2278	253	13528	1.90127	1.85647e-05	7.83329e-08	7.71808e-06
GOTERM_BP_FAT	GO:0043066~negative regulation of apoptosis	104	4.31177	4.35561e-09	4208, 55437, 2149, 685, 3084, 332, 3479, 6347, 2099, 4615, 3480, 3481, 6868, 8878, 8877, 6093, 1280, 673, 3551, 207, 122042, 348, 6608, 4893, 84335, 728590, 472, 6777, 6776, 4790, 4792, 4609, 1910, 5618, 5970, 3845, 5045, 2073, 5046, 440577, 7189, 2068, 7422, 4803, 5139, 4804, 9021, 624, 7046, 4091, 2308, 324, 2796, 651610, 183, 396, 7057, 4853, 60675, 4851, 8767, 8841, 983, 8835, 2249, 387, 5584…	2278	354	13528	1.74466	1.97307e-05	8.29029e-08	8.20283e-06
GOTERM_BP_FAT	GO:0007010~cytoskeleton organization	122	5.05804	4.52187e-09	154796, 29127, 10403, 3861, 6348, 54908, 10540, 150, 9148, 253260, 6093, 5747, 672, 7283, 5170, 9738, 348, 89846, 3688, 4893, 11004, 54820, 4690, 8243, 11130, 5048, 3845, 25777, 10426, 553158, 440577, 55722, 8655, 81565, 1069, 23092, 8440, 64411, 81027, 5155, 393, 5898, 395, 116985, 80254, 9564, 26271, 1778, 9183, 1398, 10603, 57405, 9181, 23433, 1058, 5338, 203068, 397, 121512, 23332, 998, 2919,…	2278	436	13528	1.6617	2.04838e-05	8.57073e-08	8.51594e-06
GOTERM_BP_FAT	GO:0045597~positive regulation of cell differentiation	75	3.10945	5.4938e-09	338, 941, 942, 685, 3084, 4851, 3726, 3624, 60436, 6352, 3481, 4254, 2247, 387, 572, 3630, 723961, 8399, 7483, 5320, 5604, 3091, 3815, 5925, 207, 5364, 4747, 3717, 1594, 6608, 7074, 4088, 4221, 6777, 6776, 4089, 1813, 4790, 4086, 4087, 4023, 1432, 5970, 8650, 7477, 1499, 81565, 7040, 1030, 6850, 4803, 7424, 4090, 7048, 9021, 4804, 4093, 659, 657, 658, 93, 92, 2309, 653882, 91, 5196, 324, 650, 277…	2278	229	13528	1.94494	2.48866e-05	1.03695e-07	1.03464e-05
GOTERM_BP_FAT	GO:0000819~sister chromatid segregation	23	0.953566	6.00827e-09	8243, 11130, 8697, 64151, 23397, 113130, 10592, 81930, 10403, 1062, 54908, 9918, 9700, 9183, 25836, 9113, 9184, 4751, 23383, 23047, 81929, 4085, 10051	2278	37	13528	3.69153	2.72171e-05	1.12936e-07	1.13153e-05
GOTERM_BP_FAT	GO:0000165~MAPKKK cascade	64	2.6534	6.17497e-09	2914, 55437, 10818, 84634, 84432, 5781, 2149, 6464, 5578, 9459, 60675, 5021, 2911, 150, 3481, 151, 2247, 7852, 3630, 723961, 673, 5604, 2321, 5607, 1902, 9294, 2261, 3717, 2260, 2885, 4221, 3643, 5598, 4086, 5594, 5319, 134, 5599, 2357, 1956, 136, 9261, 1950, 7474, 2785, 2771, 728, 727, 6850, 5515, 5518, 5562, 7046, 1848, 1846, 3672, 2690, 23566, 151742, 51738, 5291, 1399, 9170, 2549, 121512, 7057	2278	184	13528	2.06558	2.79722e-05	1.15589e-07	1.16292e-05
GOTERM_BP_FAT	GO:0051048~negative regulation of secretion	29	1.20232	6.35298e-09	134, 5781, 3084, 2917, 11255, 5020, 3625, 336, 1950, 8074, 5715, 3624, 335, 8622, 3481, 2837, 10468, 3630, 723961, 2065, 4889, 130399, 1906, 4886, 1907, 2693, 51738, 1908, 7200, 1813, 1814	2278	55	13528	3.13123	2.87786e-05	1.18432e-07	1.19644e-05
GOTERM_BP_FAT	GO:0060284~regulation of cell development	69	2.8607	6.9133e-09	388585, 4854, 3280, 9241, 4851, 57534, 2683, 8841, 60436, 3481, 2247, 387, 3630, 723961, 53637, 2902, 5747, 375790, 1286, 55755, 3815, 5364, 1906, 4747, 7311, 348, 4974, 10371, 28514, 6608, 6696, 8829, 7074, 728590, 4088, 84894, 1813, 4089, 1814, 55558, 4086, 4087, 5970, 7476, 8650, 10014, 81565, 7040, 4803, 1840, 7424, 4099, 4804, 8997, 4092, 65078, 8851, 57142, 657, 653882, 9734, 9759, 650, 715…	2278	205	13528	1.99883	3.13167e-05	1.28349e-07	1.30197e-05
GOTERM_BP_FAT	GO:0043405~regulation of MAP kinase activity	53	2.19735	7.48834e-09	2914, 10818, 84432, 5781, 6464, 5578, 60675, 7249, 2911, 150, 4254, 151, 2247, 7852, 57761, 2064, 5604, 3815, 1902, 1906, 9294, 348, 1908, 3643, 5319, 2357, 1956, 136, 3845, 1950, 2785, 3356, 728, 7040, 727, 6850, 5515, 5518, 5562, 1848, 3672, 10253, 5155, 10252, 653882, 2690, 23566, 51738, 5291, 9170, 2549, 2688, 121512, 7057	2278	141	13528	2.23222	3.39216e-05	1.38458e-07	1.41026e-05
GOTERM_BP_FAT	GO:0010562~positive regulation of phosphorus metabolic process	42	1.74129	8.48581e-09	134, 920, 1910, 2147, 941, 1956, 5578, 3479, 1950, 10395, 2475, 2069, 3481, 7040, 4254, 6868, 6850, 2247, 7424, 885, 253260, 723961, 3630, 51422, 7046, 595, 659, 657, 92, 916, 2690, 650, 3717, 1909, 64223, 2688, 183, 8312, 894, 4089, 3643, 4067, 7057, 896	2278	100	13528	2.49419	3.844e-05	1.56263e-07	1.59812e-05
GOTERM_BP_FAT	GO:0045937~positive regulation of phosphate metabolic process	42	1.74129	8.48581e-09	134, 920, 1910, 2147, 941, 1956, 5578, 3479, 1950, 10395, 2475, 2069, 3481, 7040, 4254, 6868, 6850, 2247, 7424, 885, 253260, 723961, 3630, 51422, 7046, 595, 659, 657, 92, 916, 2690, 650, 3717, 1909, 64223, 2688, 183, 8312, 894, 4089, 3643, 4067, 7057, 896	2278	100	13528	2.49419	3.844e-05	1.56263e-07	1.59812e-05
GOTERM_BP_FAT	GO:0008361~regulation of cell size	69	2.8607	8.64883e-09	154796, 4853, 3084, 7249, 3624, 2475, 3481, 6868, 2247, 8877, 8527, 3630, 723961, 55914, 2263, 5607, 5925, 1385, 57521, 207, 1906, 2261, 2260, 1594, 10371, 7248, 6696, 8829, 84335, 4088, 4089, 58191, 55558, 26281, 11108, 2033, 1029, 1027, 1026, 440577, 2786, 1032, 7040, 1031, 2837, 623, 5515, 4803, 5518, 8992, 552, 7046, 102, 551, 259230, 2395, 57142, 147, 5155, 4869, 394, 91, 1019, 51079, 1874, …	2278	206	13528	1.98912	3.91784e-05	1.5862e-07	1.62882e-05
GOTERM_BP_FAT	GO:0044087~regulation of cellular component biogenesis	53	2.19735	9.90561e-09	154796, 84634, 5578, 7249, 5021, 5020, 10395, 2475, 6869, 387, 885, 253260, 1978, 2902, 5747, 375790, 5588, 1286, 1901, 3815, 1906, 5921, 7311, 64223, 5590, 7248, 9113, 728590, 4088, 5879, 4690, 2932, 7476, 22919, 1027, 7472, 10013, 5562, 8440, 7046, 4091, 5728, 5898, 7013, 395, 116985, 653882, 324, 6233, 2693, 51738, 23433, 6863, 998, 7057	2278	142	13528	2.2165	4.48714e-05	1.80937e-07	1.8655e-05
GOTERM_BP_FAT	GO:0051129~negative regulation of cellular component organization	53	2.19735	9.90561e-09	336, 10395, 335, 9700, 387, 1978, 65057, 2067, 5747, 672, 1901, 344, 345, 4974, 10371, 5590, 8829, 6696, 472, 84894, 23122, 4085, 5879, 55558, 2072, 22919, 440577, 7040, 10013, 4099, 4804, 4092, 4091, 65078, 7014, 5728, 57142, 699, 7013, 395, 4869, 116985, 324, 26277, 1062, 54386, 9181, 23433, 651610, 9138, 25913, 396, 23332, 998, 7057	2278	142	13528	2.2165	4.48714e-05	1.80937e-07	1.8655e-05
GOTERM_BP_FAT	GO:0003073~regulation of systemic arterial blood pressure	22	0.912106	1.06511e-08	659, 146, 147, 796, 1906, 155, 1585, 1907, 154, 153, 1908, 2837, 183, 185, 186, 1813, 1814, 1816, 552, 553, 5125, 551	2278	35	13528	3.7328	4.82482e-05	1.93773e-07	2.0059e-05
GOTERM_BP_FAT	GO:0010638~positive regulation of organelle organization	37	1.534	1.15743e-08	154796, 84634, 685, 940, 3479, 1027, 7472, 1950, 440577, 2475, 9700, 2069, 3481, 6869, 387, 8440, 253260, 723961, 3630, 10733, 9475, 7014, 7013, 5321, 5588, 4869, 324, 26277, 1062, 1906, 1908, 64223, 6863, 25913, 4088, 4221, 1814, 3643, 5879, 4690	2278	83	13528	2.6473	5.24302e-05	2.09726e-07	2.17977e-05
GOTERM_BP_FAT	GO:0050679~positive regulation of epithelial cell proliferation	24	0.995025	1.28069e-08	2066, 2064, 657, 284217, 1956, 9241, 11255, 2683, 2254, 3791, 2252, 5607, 3479, 5617, 7040, 6869, 7422, 2255, 2246, 2247, 7424, 3915, 894, 3912	2278	41	13528	3.47622	5.80136e-05	2.31136e-07	2.4119e-05
GOTERM_BP_FAT	GO:0030509~BMP signaling pathway	25	1.03648	1.30893e-08	659, 64750, 657, 658, 57154, 93, 92, 9241, 91851, 9350, 650, 7321, 64388, 11167, 7323, 9765, 8239, 4090, 10468, 4089, 6497, 4093, 4092, 4086, 4091	2278	44	13528	3.37417	5.9293e-05	2.35297e-07	2.46509e-05
GOTERM_BP_FAT	GO:0048511~rhythmic process	49	2.03151	1.51089e-08	23239, 129521, 60675, 1956, 5021, 2252, 3625, 1392, 3363, 3624, 2069, 94233, 2837, 7422, 50865, 2064, 2903, 658, 2904, 2065, 5241, 5321, 9420, 2309, 3791, 4889, 1019, 2488, 650, 128674, 2796, 2691, 5367, 1907, 4543, 51738, 540, 2491, 3973, 2492, 3955, 183, 6777, 1812, 894, 6776, 1813, 1814, 898	2278	128	13528	2.27335	6.84411e-05	2.70527e-07	2.84543e-05
GOTERM_BP_FAT	GO:0015914~phospholipid transport	21	0.870647	1.88184e-08	148229, 8399, 23120, 23200, 57205, 24, 344, 336, 345, 10079, 335, 10396, 348, 5205, 79895, 51761, 57198, 374868, 57194, 23250, 286410	2278	33	13528	3.77907	8.52439e-05	3.3562e-07	3.54404e-05
GOTERM_BP_FAT	GO:0000070~mitotic sister chromatid segregation	22	0.912106	2.15079e-08	8243, 11130, 8697, 64151, 23397, 113130, 10592, 81930, 10403, 1062, 54908, 9918, 9700, 9183, 25836, 9184, 4751, 23383, 23047, 81929, 4085, 10051	2278	36	13528	3.62911	9.74261e-05	3.82082e-07	4.05054e-05
GOTERM_BP_FAT	GO:0007613~memory	23	0.953566	2.31602e-08	2902, 114, 5728, 2903, 23236, 8516, 2904, 11255, 2917, 5021, 5664, 5020, 478, 1392, 3356, 6198, 6869, 5590, 6863, 4803, 3678, 107, 1812	2278	39	13528	3.50222	0.00010491	4.09827e-07	4.36172e-05
GOTERM_BP_FAT	GO:0001568~blood vessel development	77	3.19237	2.50745e-08	154796, 338, 4855, 84432, 60675, 4851, 2254, 57534, 2683, 23462, 2251, 8841, 3726, 3676, 151, 388, 2246, 2247, 3679, 5327, 1289, 538, 7852, 8879, 3576, 506, 1281, 5747, 54567, 3091, 2321, 3791, 1901, 207, 1906, 23509, 348, 5921, 1909, 3685, 6608, 2255, 8828, 8829, 58504, 1277, 1278, 1432, 10672, 56848, 1950, 8613, 1499, 2069, 8817, 3516, 7422, 7424, 7048, 7046, 4092, 5728, 57142, 5154, 147, 2308,…	2278	245	13528	1.8664	0.000113581	4.41974e-07	4.72223e-05
GOTERM_BP_FAT	GO:0007173~epidermal growth factor receptor signaling pathway	19	0.787728	2.61092e-08	6714, 55914, 9252, 1956, 6464, 2060, 9564, 53358, 867, 1950, 2069, 2886, 7040, 6868, 2549, 2885, 8440, 1839, 8527	2278	28	13528	4.02973	0.000118268	4.58428e-07	4.91709e-05
GOTERM_BP_FAT	GO:0006270~DNA replication initiation	14	0.580431	2.85366e-08	4173, 4172, 4175, 4174, 4176, 8318, 4171, 4998, 4999, 5000, 9134, 5001, 5422, 29935	2278	16	13528	5.19622	0.000129262	4.99115e-07	5.37423e-05
GOTERM_BP_FAT	GO:0043535~regulation of blood vessel endothelial cell migration	14	0.580431	2.85366e-08	51564, 154796, 5155, 54567, 9734, 5340, 348, 10014, 7040, 7422, 2247, 7424, 186, 7057	2278	16	13528	5.19622	0.000129262	4.99115e-07	5.37423e-05
GOTERM_BP_FAT	GO:0006261~DNA-dependent DNA replication	29	1.20232	2.86232e-08	1763, 5557, 5558, 8318, 57804, 5984, 6117, 5422, 10714, 6118, 7084, 29935, 4173, 5427, 4172, 4175, 4174, 4176, 5424, 5425, 5981, 5983, 4171, 4998, 4999, 9134, 5000, 2237, 5001	2278	58	13528	2.96927	0.000129655	4.98704e-07	5.39055e-05
GOTERM_BP_FAT	GO:0045776~negative regulation of blood pressure	17	0.704809	2.9409e-08	659, 146, 4852, 11255, 796, 5020, 5367, 155, 154, 153, 2837, 623, 186, 1813, 1814, 624, 1816	2278	23	13528	4.38936	0.000133214	5.10431e-07	5.53853e-05
GOTERM_BP_FAT	GO:0048661~positive regulation of smooth muscle cell proliferation	20	0.829187	3.31145e-08	3673, 4331, 4855, 5155, 5578, 1956, 6772, 2321, 1901, 4889, 3479, 10203, 1906, 2069, 6198, 7422, 10554, 6777, 1839, 7048	2278	31	13528	3.83132	0.000149997	5.72551e-07	6.23638e-05
GOTERM_BP_FAT	GO:0006084~acetyl-CoA metabolic process	20	0.829187	3.31145e-08	3420, 1743, 23530, 1431, 5162, 4191, 1738, 1737, 283398, 2271, 6389, 6392, 8802, 8803, 6390, 3419, 8801, 6391, 3418, 3421, 50	2278	31	13528	3.83132	0.000149997	5.72551e-07	6.23638e-05
GOTERM_BP_FAT	GO:0001944~vasculature development	78	3.23383	3.45501e-08	154796, 338, 4855, 84432, 60675, 4851, 2254, 57534, 2683, 23462, 2251, 8841, 3726, 3676, 151, 388, 2246, 2247, 3679, 5327, 1289, 538, 7852, 8879, 3576, 506, 1281, 5747, 54567, 3091, 2321, 3791, 1901, 207, 1906, 23509, 348, 5921, 1909, 3685, 6608, 2255, 8828, 8829, 58504, 1277, 1278, 1432, 10672, 56848, 1950, 8613, 1499, 2069, 8817, 3516, 7422, 7424, 7048, 7046, 4092, 5728, 57142, 5154, 147, 2308,…	2278	251	13528	1.84544	0.0001565	5.95102e-07	6.50674e-05
GOTERM_BP_FAT	GO:0022604~regulation of cell morphogenesis	49	2.03151	3.55056e-08	2768, 8650, 7476, 2335, 10672, 10395, 81565, 7040, 7422, 387, 4803, 57381, 3679, 4099, 221472, 2245, 4804, 57194, 4092, 65078, 64411, 2902, 57142, 5747, 116985, 3791, 5364, 4747, 5921, 348, 89846, 4974, 10371, 23433, 6696, 3689, 8829, 9138, 7074, 4088, 84894, 396, 2534, 2909, 4089, 121512, 55558, 4086, 4087	2278	131	13528	2.22129	0.000160827	6.09244e-07	6.6867e-05
GOTERM_BP_FAT	GO:0042327~positive regulation of phosphorylation	40	1.65837	3.70337e-08	920, 1910, 2147, 941, 1956, 5578, 3479, 1950, 2475, 2069, 3481, 7040, 4254, 6868, 6850, 2247, 7424, 885, 253260, 723961, 3630, 51422, 7046, 595, 659, 657, 92, 916, 2690, 650, 3717, 1909, 64223, 2688, 183, 8312, 894, 4089, 3643, 4067, 7057, 896	2278	97	13528	2.44888	0.000167749	6.33066e-07	6.97448e-05
GOTERM_BP_FAT	GO:0019217~regulation of fatty acid metabolic process	26	1.07794	3.89004e-08	55437, 6794, 2475, 3481, 5565, 5564, 5563, 5562, 723961, 3630, 51422, 552, 551, 92335, 5321, 672, 8660, 53632, 344, 345, 207, 208, 2693, 5571, 183, 51719, 3667, 81617	2278	49	13528	3.15106	0.000176203	6.62477e-07	7.32603e-05
GOTERM_BP_FAT	GO:0051960~regulation of nervous system development	64	2.6534	3.89892e-08	388585, 4854, 5578, 3280, 9241, 4851, 57534, 5021, 3479, 5020, 60436, 387, 2247, 53637, 2902, 5747, 375790, 1286, 55755, 3815, 5364, 4747, 7311, 348, 4974, 28514, 10371, 6608, 6696, 8829, 728590, 7074, 84894, 1813, 1814, 55558, 4086, 5970, 7476, 8650, 1950, 81565, 7040, 4803, 1840, 7424, 4099, 4804, 8997, 65078, 8851, 57142, 657, 653882, 650, 7157, 6233, 2693, 51738, 7050, 9138, 396, 894, 7532, 4…	2278	192	13528	1.97951	0.000176606	6.61503e-07	7.34276e-05
GOTERM_BP_FAT	GO:0008286~insulin receptor signaling pathway	22	0.912106	4.18512e-08	6121, 4303, 8503, 2308, 6464, 9564, 2931, 8660, 207, 208, 10603, 3480, 3481, 2887, 23433, 2549, 2885, 3667, 1978, 5770, 3643, 723961, 3630, 5295	2278	37	13528	3.53103	0.000189568	7.0741e-07	7.88175e-05
GOTERM_BP_FAT	GO:0048146~positive regulation of fibroblast proliferation	18	0.746269	4.43442e-08	5154, 5155, 890, 5156, 685, 4724, 56034, 1019, 3479, 1026, 7050, 2069, 1021, 2837, 183, 8877, 4804, 5319	2278	26	13528	4.1113	0.000200859	7.46762e-07	8.35125e-05
GOTERM_BP_FAT	GO:0009109~coenzyme catabolic process	18	0.746269	4.43442e-08	3420, 1743, 23530, 1431, 5162, 4191, 283398, 2271, 6389, 6392, 8802, 8803, 6390, 3419, 8801, 3418, 6391, 3421, 50	2278	26	13528	4.1113	0.000200859	7.46762e-07	8.35125e-05
GOTERM_BP_FAT	GO:0046578~regulation of Ras protein signal transduction	68	2.81924	5.02075e-08	84144, 6655, 4853, 9459, 50649, 9828, 3479, 10395, 9826, 2475, 84033, 50650, 23370, 27237, 65012, 25791, 2245, 221472, 8525, 253260, 1894, 2064, 6453, 8874, 5604, 23365, 7409, 1901, 5924, 1902, 23229, 29, 85360, 89846, 64223, 23263, 4893, 7410, 7248, 7074, 7204, 5879, 6654, 4168, 3265, 51291, 3845, 5048, 81565, 10276, 5516, 116984, 8997, 64411, 26230, 116985, 11214, 10928, 115557, 1398, 10603, 91…	2278	210	13528	1.92296	0.000227414	8.4237e-07	9.45547e-05
GOTERM_BP_FAT	GO:0016055~Wnt receptor signaling pathway	49	2.03151	6.1398e-08	8321, 8322, 8323, 8324, 8325, 8326, 7484, 89780, 7483, 1856, 79718, 7976, 7482, 7481, 7480, 5494, 8312, 80326, 54361, 58496, 1457, 1459, 7471, 1453, 1452, 1455, 2932, 7476, 7477, 8945, 7478, 7479, 7472, 7473, 7474, 7475, 1499, 7089, 7088, 6907, 1460, 595, 11211, 7855, 324, 51384, 10076, 2535, 7090, 7091	2278	133	13528	2.18788	0.000278094	1.02632e-06	0.00011563
GOTERM_BP_FAT	GO:0010243~response to organic nitrogen	30	1.24378	6.16487e-08	135, 6750, 5970, 5021, 6347, 5020, 1026, 2475, 8992, 595, 2902, 4314, 2903, 3673, 147, 5321, 6506, 496, 2775, 5530, 4747, 2774, 6198, 1812, 1813, 1814, 1816, 898, 4067, 4086	2278	63	13528	2.82788	0.00027923	1.02672e-06	0.000116102
GOTERM_BP_FAT	GO:0030155~regulation of cell adhesion	50	2.07297	6.23049e-08	284217, 3084, 3827, 7249, 3383, 7448, 2246, 3576, 506, 3714, 2064, 2065, 5604, 7409, 1901, 5921, 3717, 28514, 5590, 7248, 6696, 4088, 6777, 1277, 6776, 5140, 5618, 1029, 3909, 3908, 7040, 6376, 5515, 5518, 102, 3655, 4092, 3673, 5728, 6714, 395, 324, 5291, 1021, 396, 397, 398, 5295, 10451, 7057	2278	137	13528	2.16735	0.000282202	1.03385e-06	0.000117338
GOTERM_BP_FAT	GO:0006940~regulation of smooth muscle contraction	22	0.912106	7.87237e-08	3673, 2149, 136, 10874, 60675, 5604, 5021, 2321, 796, 5020, 477, 6870, 1129, 1906, 1907, 154, 2693, 6869, 1131, 6915, 8877, 56923	2278	38	13528	3.4381	0.000356555	1.30153e-06	0.000148259
GOTERM_BP_FAT	GO:0045787~positive regulation of cell cycle	28	1.16086	8.34822e-08	1956, 685, 940, 332, 3479, 1950, 9700, 2069, 3481, 6868, 8877, 723961, 3630, 1543, 4091, 595, 7013, 4193, 1062, 207, 1906, 351, 1908, 5500, 6777, 894, 6776, 1814, 3643, 896	2278	57	13528	2.91718	0.000378103	1.37518e-06	0.00015722
GOTERM_BP_FAT	GO:0010565~regulation of cellular ketone metabolic process	28	1.16086	8.34822e-08	55437, 6794, 646227, 2475, 3481, 5565, 5564, 5563, 5562, 723961, 3630, 10776, 51422, 552, 551, 92335, 5321, 672, 344, 8660, 53632, 345, 207, 208, 2693, 5571, 183, 51719, 3667, 81617, 9965	2278	57	13528	2.91718	0.000378103	1.37518e-06	0.00015722
GOTERM_BP_FAT	GO:0009894~regulation of catabolic process	39	1.61692	9.02366e-08	134, 5140, 7514, 5970, 10273, 5045, 3479, 2931, 4734, 336, 8843, 2475, 3481, 23327, 723961, 3630, 51422, 5582, 9146, 4092, 2903, 147, 5708, 2905, 5709, 5707, 3091, 9759, 324, 4193, 344, 8660, 345, 207, 208, 348, 5571, 5500, 3667, 3643, 83737, 338442	2278	96	13528	2.41253	0.000408688	1.48106e-06	0.000169941
GOTERM_BP_FAT	GO:0043279~response to alkaloid	27	1.1194	9.55401e-08	135, 2912, 5970, 5021, 5020, 6870, 5520, 3358, 6869, 551, 2902, 147, 2690, 2775, 2774, 1909, 3351, 1020, 2280, 6863, 1812, 3066, 1813, 1814, 1816, 4609, 7384	2278	54	13528	2.96927	0.000432703	1.56244e-06	0.000179929
GOTERM_BP_FAT	GO:0031344~regulation of cell projection organization	37	1.534	1.024e-07	8650, 7476, 2475, 81565, 4803, 387, 4099, 4804, 8997, 7046, 65078, 2902, 57142, 5747, 3673, 5588, 5898, 116985, 653882, 3815, 324, 5364, 4747, 348, 4974, 10371, 23433, 6696, 8829, 9138, 7074, 396, 84894, 4915, 5879, 998, 55558, 4086	2278	89	13528	2.46883	0.000463766	1.66861e-06	0.000192848
GOTERM_BP_FAT	GO:0050730~regulation of peptidyl-tyrosine phosphorylation	31	1.28524	1.19467e-07	920, 941, 1956, 5578, 56034, 3479, 8651, 1950, 2475, 80310, 3481, 4254, 6850, 5515, 5518, 885, 253260, 723961, 3630, 5580, 5581, 5159, 5154, 5155, 2690, 916, 3717, 64223, 5590, 2688, 183, 3689, 4067	2278	68	13528	2.70728	0.000541037	1.93973e-06	0.000224989
GOTERM_BP_FAT	GO:0045936~negative regulation of phosphate metabolic process	25	1.03648	1.19797e-07	5578, 440917, 5664, 1029, 1027, 8651, 1026, 3624, 8655, 1032, 7040, 1030, 1031, 623, 5515, 5518, 624, 4092, 5580, 4091, 7529, 2280, 5590, 4221, 3643, 7531	2278	48	13528	3.09299	0.000542532	1.93814e-06	0.00022561
GOTERM_BP_FAT	GO:0010563~negative regulation of phosphorus metabolic process	25	1.03648	1.19797e-07	5578, 440917, 5664, 1029, 1027, 8651, 1026, 3624, 8655, 1032, 7040, 1030, 1031, 623, 5515, 5518, 624, 4092, 5580, 4091, 7529, 2280, 5590, 4221, 3643, 7531	2278	48	13528	3.09299	0.000542532	1.93814e-06	0.00022561
GOTERM_BP_FAT	GO:0014075~response to amine stimulus	22	0.912106	1.43548e-07	135, 2902, 4314, 6750, 3673, 2903, 147, 5970, 5021, 6506, 6347, 5020, 2475, 5530, 2774, 6198, 1812, 8992, 1813, 1814, 1816, 4067	2278	39	13528	3.34995	0.00065006	2.31413e-06	0.00027034
GOTERM_BP_FAT	GO:0051047~positive regulation of secretion	42	1.74129	1.5115e-07	134, 135, 5950, 84634, 5781, 136, 10874, 5578, 685, 5021, 5020, 3625, 1392, 156, 8843, 5715, 3624, 3358, 3481, 6869, 7040, 6850, 7424, 723961, 3630, 552, 553, 551, 8399, 2904, 5588, 1385, 2692, 2691, 1906, 3717, 1907, 51738, 1020, 1908, 6863, 7200, 1813, 338442, 5319	2278	109	13528	2.28825	0.000684476	2.42805e-06	0.000284658
GOTERM_BP_FAT	GO:0045596~negative regulation of cell differentiation	68	2.81924	1.66794e-07	388585, 4303, 4855, 4854, 4853, 3280, 9241, 4851, 57534, 3479, 8841, 3624, 2249, 8360, 387, 8362, 1387, 8361, 8364, 8363, 8366, 8365, 6497, 8368, 8367, 51564, 5747, 5320, 5744, 3815, 3690, 25937, 3685, 4974, 10371, 28514, 3688, 2255, 6696, 8829, 54361, 4088, 84894, 8294, 6777, 4221, 6776, 1814, 8359, 4792, 55558, 5594, 8074, 1499, 10014, 2069, 7040, 1840, 121504, 4099, 10468, 4804, 554313, 7046, …	2278	216	13528	1.86954	0.000755291	2.66988e-06	0.000314119
GOTERM_BP_FAT	GO:0051056~regulation of small GTPase mediated signal transduction	76	3.15091	2.04311e-07	84144, 6655, 4853, 9459, 50649, 9828, 7249, 3479, 10395, 9826, 2475, 84033, 50650, 23370, 27237, 65012, 25791, 221472, 2245, 8525, 253260, 1894, 2064, 6453, 10235, 8874, 5604, 23365, 7409, 1901, 5924, 1902, 23229, 5921, 29, 85360, 2889, 89846, 64223, 23263, 4893, 7410, 7248, 7074, 7204, 5879, 6654, 4168, 3265, 51291, 3845, 5048, 81565, 10276, 5516, 116984, 8997, 64411, 10411, 26230, 116985, 11214…	2278	252	13528	1.79099	0.000925102	3.25891e-06	0.000384775
GOTERM_BP_FAT	GO:0051052~regulation of DNA metabolic process	43	1.78275	2.09727e-07	651921, 3265, 6464, 1763, 56034, 2072, 3479, 8318, 3364, 3480, 2069, 3481, 7040, 4254, 5515, 5518, 7270, 65057, 723961, 3630, 5111, 5582, 2067, 7014, 81620, 5154, 648152, 5155, 5156, 7013, 672, 5884, 5883, 1017, 26277, 51053, 3014, 7157, 54386, 3060, 990, 545, 25913, 3643, 6778, 4609, 5319	2278	114	13528	2.23998	0.000949611	3.33354e-06	0.000394973
GOTERM_BP_FAT	GO:0018108~peptidyl-tyrosine phosphorylation	24	0.995025	2.19554e-07	2147, 5618, 2149, 6772, 1950, 6850, 5159, 1859, 2066, 2064, 6714, 2065, 5156, 653882, 2321, 3815, 2690, 2241, 3718, 3717, 2242, 2534, 6776, 3643, 4067	2278	46	13528	3.09837	0.000994084	3.47754e-06	0.00041348
GOTERM_BP_FAT	GO:0007093~mitotic cell cycle checkpoint	23	0.953566	2.39247e-07	595, 8379, 11130, 4303, 890, 7013, 699, 5884, 324, 1062, 3364, 7157, 9735, 983, 9183, 1030, 7040, 651610, 472, 9184, 8525, 55055, 701, 4085	2278	43	13528	3.17643	0.0010832	3.77627e-06	0.000450569
GOTERM_BP_FAT	GO:0019229~regulation of vasoconstriction	20	0.829187	2.60113e-07	659, 133, 2149, 5588, 5604, 477, 4886, 1906, 1907, 3356, 1908, 6869, 2837, 183, 1131, 185, 6915, 624, 552, 551	2278	34	13528	3.49326	0.00117762	4.09136e-06	0.000489865
GOTERM_BP_FAT	GO:0045777~positive regulation of blood pressure	16	0.66335	2.97976e-07	134, 146, 147, 5021, 5020, 6870, 1585, 153, 6869, 2837, 183, 347148, 1816, 552, 553, 551	2278	23	13528	4.13116	0.00134892	4.67068e-06	0.00056117
GOTERM_BP_FAT	GO:0046777~protein amino acid autophosphorylation	35	1.45108	3.16121e-07	1457, 1455, 1956, 7472, 2475, 3480, 6789, 6850, 92597, 3654, 7046, 5159, 1859, 2064, 5747, 815, 5156, 816, 817, 653882, 91, 7525, 818, 5566, 3815, 2241, 207, 7443, 7444, 3717, 1020, 4751, 2534, 3643, 5598, 4915	2278	85	13528	2.44528	0.00143101	4.93802e-06	0.000595343
GOTERM_BP_FAT	GO:0048514~blood vessel morphogenesis	66	2.73632	3.35402e-07	154796, 338, 4855, 84432, 60675, 4851, 2254, 2683, 23462, 2251, 8841, 3726, 3676, 151, 388, 2246, 2247, 3679, 5327, 7852, 538, 8879, 3576, 506, 5747, 54567, 2321, 3091, 3791, 1901, 1906, 23509, 348, 5921, 1909, 6608, 8828, 2255, 8829, 58504, 1432, 10672, 1950, 1499, 2069, 8817, 3516, 7422, 7424, 7048, 7046, 4092, 5728, 57142, 5154, 147, 10352, 2277, 23493, 6387, 182, 183, 186, 83478, 4915, 7057	2278	211	13528	1.85755	0.00151822	5.22119e-06	0.000631653
GOTERM_BP_FAT	GO:0001934~positive regulation of protein amino acid phosphorylation	36	1.49254	3.47297e-07	920, 1910, 2147, 941, 5578, 3479, 2475, 3481, 7040, 4254, 6868, 6850, 2247, 7424, 885, 253260, 723961, 3630, 51422, 7046, 595, 659, 657, 92, 916, 2690, 650, 3717, 1909, 64223, 2688, 183, 8312, 894, 4089, 3643, 4067, 896	2278	89	13528	2.40211	0.00157202	5.38785e-06	0.000654056
GOTERM_BP_FAT	GO:0050921~positive regulation of chemotaxis	18	0.746269	4.41087e-07	3673, 5155, 5578, 1901, 3791, 1907, 1233, 6387, 1908, 7040, 6868, 7422, 2255, 4088, 2150, 102, 7057, 3576	2278	29	13528	3.68599	0.00199613	6.81952e-06	0.000830688
GOTERM_BP_FAT	GO:0044271~nitrogen compound biosynthetic process	91	3.7728	4.7982e-07	148229, 114, 115, 112, 113, 23200, 111, 7298, 487, 57205, 9551, 489, 488, 10396, 535, 482, 483, 480, 533, 481, 539, 538, 51422, 4514, 506, 509, 23120, 27032, 9914, 6507, 476, 2752, 9296, 478, 196883, 477, 50617, 207, 23545, 479, 4508, 540, 1719, 4509, 9114, 10476, 79895, 51761, 374868, 9054, 135, 133, 6241, 56848, 51606, 90423, 513, 5205, 7040, 109, 108, 10632, 107, 245972, 57198, 8992, 245973, 5…	2278	325	13528	1.66279	0.00217122	7.39312e-06	0.000903631
GOTERM_BP_FAT	GO:0045933~positive regulation of muscle contraction	15	0.621891	5.02947e-07	3673, 2149, 10874, 60675, 487, 5021, 476, 5020, 6870, 1906, 1907, 6869, 1131, 6915, 8877	2278	21	13528	4.24182	0.00227576	7.7232e-06	0.000947186
GOTERM_BP_FAT	GO:0007268~synaptic transmission	85	3.52405	5.14759e-07	2914, 2915, 2912, 2913, 2918, 2916, 5578, 4852, 2917, 11255, 5021, 5020, 1392, 2911, 5368, 378708, 2247, 5327, 4923, 2902, 2903, 5747, 2904, 2905, 5173, 375790, 2906, 1286, 1325, 4889, 6506, 6507, 477, 5367, 7311, 348, 3352, 4544, 3351, 3354, 10911, 728590, 1812, 1813, 1814, 6014, 1816, 10142, 5594, 134, 135, 6750, 1742, 7476, 5048, 53358, 27115, 7472, 1128, 3362, 3363, 1499, 3356, 8620, 8484, 33…	2278	298	13528	1.69388	0.00232914	7.87786e-06	0.00096943
GOTERM_BP_FAT	GO:0032535~regulation of cellular component size	79	3.27529	5.28229e-07	154796, 4853, 3084, 7249, 3624, 2475, 3481, 6868, 2247, 8877, 253260, 8527, 3630, 723961, 55914, 2263, 5607, 5925, 1385, 57521, 207, 1906, 2261, 4747, 5921, 2260, 1594, 10371, 64223, 7248, 6696, 9113, 8829, 84335, 4088, 4089, 58191, 5879, 55558, 4690, 26281, 11108, 2033, 7476, 1029, 1027, 1026, 440577, 2786, 1032, 7040, 1031, 2837, 623, 5515, 4803, 5518, 8440, 8992, 552, 7046, 102, 259230, 551, 2…	2278	271	13528	1.73116	0.00239002	8.05679e-06	0.000994797
GOTERM_BP_FAT	GO:0031589~cell-substrate adhesion	38	1.57546	5.41178e-07	8515, 8516, 7450, 2335, 10395, 3681, 1499, 7448, 3675, 3674, 387, 3679, 3696, 22801, 10018, 3655, 1281, 3673, 3672, 1308, 395, 5170, 3690, 3691, 3693, 3694, 3695, 1020, 3685, 3688, 183, 7248, 3689, 3915, 50509, 7059, 3912, 88	2278	98	13528	2.3027	0.00244854	8.2266e-06	0.00101918
GOTERM_BP_FAT	GO:0006937~regulation of muscle contraction	31	1.28524	5.46883e-07	6752, 4660, 2149, 136, 60675, 5578, 10874, 487, 5021, 5020, 10203, 6870, 156, 1129, 154, 6869, 1131, 8877, 4092, 3673, 5604, 2321, 476, 796, 477, 1906, 2693, 1907, 6385, 6915, 56923	2278	72	13528	2.55687	0.00247431	8.28551e-06	0.00102993
GOTERM_BP_FAT	GO:0018212~peptidyl-tyrosine modification	24	0.995025	5.84243e-07	2147, 5618, 2149, 6772, 1950, 6850, 5159, 1859, 2066, 2064, 6714, 2065, 5156, 653882, 2321, 3815, 2690, 2241, 3718, 3717, 2242, 2534, 6776, 3643, 4067	2278	48	13528	2.96927	0.00264312	8.82204e-06	0.00110029
GOTERM_BP_FAT	GO:0042326~negative regulation of phosphorylation	23	0.953566	6.62942e-07	5578, 5664, 1029, 1027, 8651, 1026, 3624, 8655, 1032, 2280, 1030, 7040, 1031, 5590, 623, 5515, 5518, 4221, 3643, 624, 5580, 4092, 4091	2278	45	13528	3.03526	0.00299862	9.97712e-06	0.0012485
GOTERM_BP_FAT	GO:0045927~positive regulation of growth	33	1.36816	6.98189e-07	3084, 2033, 57678, 154, 7253, 3481, 2837, 6868, 4803, 8877, 723961, 3630, 7048, 102, 552, 7046, 551, 2395, 2690, 5607, 1385, 2692, 2691, 207, 2693, 51738, 6198, 2688, 183, 6777, 6776, 1813, 1839, 58191, 3643	2278	80	13528	2.44965	0.0031578	1.04728e-05	0.00131488
GOTERM_BP_FAT	GO:0008285~negative regulation of cell proliferation	98	4.06302	7.87223e-07	5950, 4303, 2149, 9241, 29126, 80380, 6349, 51083, 414062, 6497, 9146, 5745, 5744, 1285, 9350, 3852, 122042, 3717, 348, 1594, 51761, 4221, 1813, 6752, 6753, 6750, 6751, 440577, 2069, 7040, 8440, 7048, 624, 1445, 8850, 1111, 324, 9759, 26277, 2798, 2796, 10076, 498, 5340, 7050, 183, 990, 83737, 6755, 6754, 7057, 84634, 4853, 2919, 5578, 2683, 7249, 10395, 2247, 5777, 7251, 3576, 2064, 9500, 5320, …	2278	361	13528	1.61213	0.00355977	1.17693e-05	0.00148255
GOTERM_BP_FAT	GO:0003044~regulation of systemic arterial blood pressure mediated by a chemical signal	17	0.704809	7.91186e-07	146, 147, 1906, 155, 1585, 1907, 154, 153, 1908, 183, 185, 186, 1814, 1816, 552, 553, 5125	2278	27	13528	3.73908	0.00357766	1.17897e-05	0.00149001
GOTERM_BP_FAT	GO:0007259~JAK-STAT cascade	21	0.870647	8.05782e-07	2147, 4855, 6774, 2149, 5618, 9306, 6772, 6347, 2690, 5617, 8651, 2261, 3717, 1020, 8835, 2688, 10554, 6777, 6776, 729230, 9021	2278	39	13528	3.19768	0.00364354	1.19678e-05	0.0015175
GOTERM_BP_FAT	GO:0051492~regulation of stress fiber formation	14	0.580431	8.34232e-07	154796, 84634, 5588, 395, 116985, 7249, 1901, 10395, 2475, 6869, 6863, 7248, 387, 4088	2278	19	13528	4.37577	0.00377194	1.23498e-05	0.00157108
GOTERM_BP_FAT	GO:0046883~regulation of hormone secretion	29	1.20232	8.35639e-07	134, 5950, 5140, 84634, 5781, 2641, 10874, 3625, 8074, 1392, 5715, 8843, 3624, 8622, 10468, 130399, 1385, 2692, 2691, 1906, 4886, 1907, 3717, 2693, 51738, 1908, 7200, 1813, 6755, 338442	2278	66	13528	2.60936	0.00377829	1.23304e-05	0.00157373
GOTERM_BP_FAT	GO:0006775~fat-soluble vitamin metabolic process	19	0.787728	8.76182e-07	5950, 6121, 6017, 145226, 9227, 51109, 8074, 1576, 9249, 1594, 1591, 1583, 1592, 340665, 5948, 120227, 5947, 1543, 56603	2278	33	13528	3.41916	0.00396124	1.28866e-05	0.00165008
GOTERM_BP_FAT	GO:0046324~regulation of glucose import	19	0.787728	8.76182e-07	2066, 2065, 5578, 6506, 2931, 8660, 207, 646227, 208, 3481, 5590, 23433, 2887, 3667, 3643, 723961, 5584, 3630, 51422, 10776, 9965, 5295	2278	33	13528	3.41916	0.00396124	1.28866e-05	0.00165008
GOTERM_BP_FAT	GO:0051258~protein polymerization	24	0.995025	9.264e-07	7846, 347733, 2266, 7472, 647000, 10382, 7278, 10383, 55835, 10381, 7277, 2244, 84790, 4157, 81027, 7280, 7283, 395, 27175, 26271, 2243, 10376, 4747, 84617, 203068, 5879, 113457	2278	49	13528	2.90867	0.0041878	1.35811e-05	0.00174466
GOTERM_BP_FAT	GO:0009968~negative regulation of signal transduction	67	2.77778	9.45738e-07	5578, 9241, 2254, 7249, 8841, 156, 10395, 155, 154, 8835, 8525, 1154, 6498, 6497, 9146, 5580, 9611, 2065, 653238, 9306, 4035, 9350, 207, 1592, 5590, 2887, 7248, 8312, 340665, 54361, 84335, 4221, 1813, 1814, 4792, 56603, 5140, 57154, 51592, 5970, 10272, 8651, 2931, 5516, 5515, 5518, 7088, 4804, 9021, 4092, 4091, 64411, 595, 5728, 23592, 324, 51741, 916, 23493, 2966, 7050, 183, 5338, 186, 3667, 577…	2278	221	13528	1.80037	0.00427503	1.38199e-05	0.00178107
GOTERM_BP_FAT	GO:0007160~cell-matrix adhesion	35	1.45108	1.12527e-06	8515, 8516, 2335, 10395, 3681, 1499, 7448, 3675, 3674, 387, 3679, 3696, 22801, 10018, 3655, 1281, 3673, 3672, 1308, 395, 5170, 3690, 3691, 3693, 3694, 3695, 1020, 3685, 3688, 183, 7248, 3689, 50509, 7059, 88	2278	89	13528	2.33538	0.00508448	1.63904e-05	0.00211917
GOTERM_BP_FAT	GO:0046326~positive regulation of glucose import	15	0.621891	1.16816e-06	2066, 2065, 6506, 8660, 207, 646227, 208, 3481, 5590, 23433, 3667, 3643, 5584, 3630, 723961, 10776, 9965, 5295	2278	22	13528	4.04901	0.00527781	1.69607e-05	0.00219996
GOTERM_BP_FAT	GO:0010828~positive regulation of glucose transport	15	0.621891	1.16816e-06	2066, 2065, 6506, 8660, 207, 646227, 208, 3481, 5590, 23433, 3667, 3643, 5584, 3630, 723961, 10776, 9965, 5295	2278	22	13528	4.04901	0.00527781	1.69607e-05	0.00219996
GOTERM_BP_FAT	GO:0043623~cellular protein complex assembly	53	2.19735	1.24883e-06	7846, 3084, 647000, 154, 10382, 4928, 374291, 10383, 10381, 2244, 4157, 79003, 5747, 7280, 375790, 7283, 27175, 10376, 4747, 4088, 4089, 5879, 4086, 4690, 4087, 113457, 5618, 7514, 347733, 56034, 2266, 7472, 7278, 25909, 55835, 7040, 3320, 7277, 8440, 84790, 1175, 6714, 81027, 4728, 395, 4724, 916, 4725, 1062, 26271, 9372, 2243, 1020, 2280, 84617, 203068	2278	162	13528	1.94286	0.00564121	1.80739e-05	0.00235186
GOTERM_BP_FAT	GO:0048584~positive regulation of response to stimulus	70	2.90216	1.27029e-06	5578, 4852, 8767, 1392, 6352, 4615, 3481, 6868, 2150, 3630, 723961, 5582, 3576, 5320, 5321, 930, 672, 3791, 1901, 4889, 5367, 1907, 3717, 1909, 1233, 1908, 1594, 2255, 8312, 4088, 6777, 6776, 9965, 4792, 5594, 5319, 136, 5970, 5664, 1604, 7189, 2069, 81565, 7040, 727, 2837, 6376, 6850, 7422, 919, 3654, 102, 3673, 6714, 5155, 9564, 916, 3014, 2691, 2693, 51738, 6387, 10603, 719, 718, 183, 6863, 18…	2278	236	13528	1.76143	0.00573791	1.83261e-05	0.00239229
GOTERM_BP_FAT	GO:0043627~response to estrogen stimulus	39	1.61692	1.31105e-06	6774, 5578, 5021, 8651, 5020, 2099, 7472, 336, 6870, 51083, 6790, 1499, 3949, 7252, 8835, 7040, 1583, 7048, 9021, 7046, 595, 5728, 5154, 5155, 890, 5156, 672, 2690, 2692, 5727, 4886, 51738, 1594, 2688, 6777, 894, 3643, 898, 5594	2278	105	13528	2.20574	0.00592148	1.88541e-05	0.00246905
GOTERM_BP_FAT	GO:0010594~regulation of endothelial cell migration	16	0.66335	1.41514e-06	51564, 154796, 5155, 54567, 9734, 1906, 5340, 348, 10014, 7040, 7422, 183, 2247, 7424, 186, 7057	2278	25	13528	3.80067	0.0063901	2.02865e-05	0.00266508
GOTERM_BP_FAT	GO:0051971~positive regulation of transmission of nerve impulse	20	0.829187	1.48064e-06	2066, 135, 3673, 84634, 1956, 10874, 1286, 5021, 6507, 6347, 5020, 6233, 7311, 3908, 6869, 3060, 5590, 6863, 728590, 1812, 4915	2278	37	13528	3.21002	0.00668484	2.11584e-05	0.00278841
GOTERM_BP_FAT	GO:0008156~negative regulation of DNA replication	17	0.704809	1.55742e-06	651921, 7014, 648152, 81620, 7013, 5884, 5883, 26277, 8318, 51053, 3364, 7157, 7040, 3060, 990, 545, 25913, 7270, 65057	2278	28	13528	3.60554	0.0070303	2.21857e-05	0.00293302
GOTERM_BP_FAT	GO:0046320~regulation of fatty acid oxidation	17	0.704809	1.55742e-06	55437, 92335, 53632, 8660, 6794, 207, 208, 2475, 5571, 5565, 5564, 5563, 5562, 51719, 3667, 81617, 51422	2278	28	13528	3.60554	0.0070303	2.21857e-05	0.00293302
GOTERM_BP_FAT	GO:0010827~regulation of glucose transport	19	0.787728	1.56926e-06	2066, 2065, 5578, 6506, 2931, 8660, 207, 646227, 208, 3481, 5590, 23433, 2887, 3667, 3643, 723961, 5584, 3630, 51422, 10776, 9965, 5295	2278	34	13528	3.3186	0.00708354	2.22842e-05	0.00295531
GOTERM_BP_FAT	GO:0050920~regulation of chemotaxis	18	0.746269	1.60235e-06	3673, 5155, 5578, 1901, 3791, 1907, 1233, 6387, 1908, 7040, 6868, 7422, 2255, 4088, 2150, 102, 7057, 3576	2278	31	13528	3.44819	0.00723235	2.2683e-05	0.00301762
GOTERM_BP_FAT	GO:0007632~visual behavior	18	0.746269	1.60235e-06	2902, 3265, 2903, 5153, 147, 653882, 3815, 6506, 3845, 478, 477, 351, 1020, 4893, 1812, 1813, 1814, 1816, 261734	2278	31	13528	3.44819	0.00723235	2.2683e-05	0.00301762
GOTERM_BP_FAT	GO:0051187~cofactor catabolic process	18	0.746269	1.60235e-06	3420, 1743, 23530, 1431, 5162, 4191, 283398, 2271, 6389, 6392, 8802, 8803, 6390, 3419, 8801, 3418, 6391, 3421, 50	2278	31	13528	3.44819	0.00723235	2.2683e-05	0.00301762
GOTERM_BP_FAT	GO:0007568~aging	40	1.65837	1.73135e-06	9365, 3265, 4855, 133, 5578, 5970, 3845, 1029, 2073, 6870, 156, 440577, 2068, 3356, 6352, 7040, 8835, 9021, 7046, 5580, 2067, 7014, 5728, 7015, 5745, 7013, 5321, 5588, 4036, 4869, 4035, 1738, 6506, 2692, 2775, 5054, 7157, 6198, 4893, 2885, 10554	2278	110	13528	2.15947	0.00781236	2.44328e-05	0.00326057
GOTERM_BP_FAT	GO:0010817~regulation of hormone levels	50	2.07297	1.76303e-06	5950, 5781, 338557, 1109, 2740, 1392, 50700, 51083, 335, 9249, 1583, 2247, 5947, 4036, 1081, 1586, 1585, 1906, 1584, 1908, 1592, 54361, 340665, 4160, 6777, 5125, 56603, 4087, 133, 145226, 5045, 5046, 9227, 51109, 4803, 1543, 1545, 2834, 93, 818, 2488, 2692, 2691, 2693, 3972, 51738, 183, 2864, 11069, 4067	2278	151	13528	1.9664	0.00795474	2.48026e-05	0.00332023
GOTERM_BP_FAT	GO:0001558~regulation of cell growth	60	2.48756	1.83754e-06	3084, 984, 9826, 3624, 3481, 8835, 6868, 2247, 1154, 8877, 3630, 723961, 10718, 7251, 10235, 5588, 5607, 5925, 207, 348, 1594, 10371, 6696, 8829, 4088, 4089, 58191, 55558, 11108, 2033, 1029, 1027, 1026, 2786, 1032, 7040, 2837, 1031, 10276, 623, 5515, 4803, 5518, 7423, 552, 7046, 102, 8548, 551, 2395, 57142, 817, 91, 9564, 51079, 4722, 7157, 183, 185, 186, 1839, 83737, 728642	2278	194	13528	1.83666	0.00828952	2.57708e-05	0.00346055
GOTERM_BP_FAT	GO:0012501~programmed cell death	148	6.13599	1.90154e-06	4208, 2147, 4205, 2149, 6772, 9459, 440917, 487, 332, 5533, 5534, 25791, 116143, 8878, 885, 8879, 89941, 57761, 1894, 6093, 1285, 672, 55851, 23645, 7409, 207, 3717, 29, 89846, 7410, 4893, 23263, 3689, 8312, 7074, 728590, 472, 4790, 7204, 4792, 4609, 11083, 27018, 3845, 51107, 8655, 2068, 23421, 7189, 83464, 10276, 4803, 4804, 10018, 5153, 57142, 7529, 393, 2309, 81537, 130399, 5340, 54205, 9181,…	2278	611	13528	1.43847	0.00857699	2.6586e-05	0.00358107
GOTERM_BP_FAT	GO:0009582~detection of abiotic stimulus	28	1.16086	2.14722e-06	5950, 2916, 10692, 2792, 94233, 221391, 6869, 2793, 4804, 3673, 2904, 2652, 10886, 24, 2779, 796, 728458, 491, 5995, 2780, 408, 6863, 611, 2534, 5956, 7222, 4609, 23596, 6010	2278	65	13528	2.55814	0.00967976	2.99285e-05	0.00404374
GOTERM_BP_FAT	GO:0003018~vascular process in circulatory system	26	1.07794	2.25723e-06	154796, 135, 1910, 136, 3827, 7472, 155, 154, 153, 7422, 624, 551, 4922, 146, 3672, 147, 797, 1906, 1907, 348, 1909, 1908, 183, 185, 186, 1816	2278	58	13528	2.66211	0.0101731	3.13653e-05	0.0042509
GOTERM_BP_FAT	GO:0055114~oxidation reduction	153	6.34328	2.50636e-06	4698, 4697, 5162, 1109, 5160, 1577, 1579, 1573, 1576, 9249, 1580, 1581, 374291, 1582, 4519, 1583, 4513, 4512, 8529, 4514, 29785, 4191, 1589, 1588, 1586, 1585, 1584, 4508, 1593, 1594, 1591, 11283, 1719, 1592, 4509, 4695, 4696, 4694, 54539, 3420, 23530, 145226, 1595, 51109, 27089, 51302, 3419, 3418, 1645, 3945, 728294, 9377, 64816, 9420, 8560, 440567, 112812, 5959, 54205, 6389, 3939, 3421, 10858, 1…	2278	639	13528	1.4219	0.0112896	3.47206e-05	0.00472008
GOTERM_BP_FAT	GO:0051493~regulation of cytoskeleton organization	46	1.90713	2.55177e-06	154796, 220134, 84634, 7514, 7249, 11190, 22919, 1027, 7472, 440577, 10395, 2475, 729012, 667, 1499, 79959, 348235, 6869, 387, 10013, 8440, 253260, 10733, 9475, 5154, 7013, 5588, 672, 395, 4869, 116985, 1901, 324, 1062, 1906, 5921, 6387, 9181, 64223, 23433, 7248, 6863, 9113, 4088, 23122, 23332, 5879, 4690	2278	136	13528	2.00862	0.011493	3.52418e-05	0.00480558
GOTERM_BP_FAT	GO:0048145~regulation of fibroblast proliferation	19	0.787728	2.72336e-06	5154, 890, 5155, 5156, 685, 4724, 56034, 1019, 3479, 1026, 7157, 7050, 2069, 1021, 2837, 183, 8877, 4804, 5319	2278	35	13528	3.22378	0.0122611	3.74973e-05	0.00512873
GOTERM_BP_FAT	GO:0019233~sensory perception of pain	18	0.746269	2.88274e-06	2902, 3673, 2903, 5179, 2904, 10874, 60675, 796, 3375, 4886, 3356, 1020, 6869, 6863, 623, 4803, 2534, 5594	2278	32	13528	3.34043	0.0129739	3.95715e-05	0.00542887
GOTERM_BP_FAT	GO:0007051~spindle organization	22	0.912106	3.09203e-06	8243, 5116, 11130, 9611, 81027, 11065, 7283, 80254, 10403, 25777, 8841, 26271, 1778, 9700, 10540, 647000, 6790, 57405, 9126, 9493, 203068, 701, 55142	2278	45	13528	2.90329	0.0139093	4.23161e-05	0.00582299
GOTERM_BP_FAT	GO:0010595~positive regulation of endothelial cell migration	11	0.456053	3.12849e-06	51564, 154796, 7040, 7422, 183, 5155, 2247, 7424, 9734, 1906, 7057	2278	13	13528	5.02492	0.0140721	4.26861e-05	0.00589166
GOTERM_BP_FAT	GO:0045786~negative regulation of cell cycle	32	1.3267	3.16116e-06	116, 11108, 1956, 1029, 1027, 1026, 8841, 3624, 7040, 388, 4803, 8525, 4804, 7013, 699, 26524, 324, 5925, 650, 51053, 1062, 836, 7157, 1020, 1021, 651610, 9113, 472, 4088, 3065, 4221, 3066, 4085	2278	81	13528	2.34609	0.014218	4.30023e-05	0.00595318
GOTERM_BP_FAT	GO:0031570~DNA integrity checkpoint	24	0.995025	3.33869e-06	651921, 11200, 4303, 5781, 1432, 84126, 8318, 3364, 983, 8525, 595, 81620, 648152, 890, 5884, 672, 5883, 80254, 1111, 3014, 7508, 7157, 651610, 990, 5810, 472, 545	2278	52	13528	2.74087	0.0150105	4.52812e-05	0.00628749
GOTERM_BP_FAT	GO:0046717~acid secretion	13	0.538972	3.42841e-06	51738, 3973, 84634, 301, 5322, 10874, 5021, 1813, 1814, 624, 5020, 56923, 5319	2278	18	13528	4.28895	0.0154107	4.63593e-05	0.00645645
GOTERM_BP_FAT	GO:0045987~positive regulation of smooth muscle contraction	13	0.538972	3.42841e-06	3673, 2149, 10874, 60675, 5021, 5020, 6870, 1906, 1907, 6869, 1131, 6915, 8877	2278	18	13528	4.28895	0.0154107	4.63593e-05	0.00645645
GOTERM_BP_FAT	GO:0006915~apoptosis	145	6.01161	3.43717e-06	4208, 2147, 4205, 2149, 6772, 9459, 440917, 487, 332, 5533, 5534, 25791, 116143, 8878, 885, 8879, 89941, 57761, 1894, 6093, 1285, 672, 55851, 23645, 7409, 207, 3717, 29, 89846, 7410, 4893, 23263, 3689, 8312, 7074, 728590, 472, 4790, 7204, 4792, 4609, 11083, 27018, 3845, 51107, 8655, 2068, 23421, 7189, 83464, 10276, 4803, 4804, 10018, 5153, 57142, 7529, 393, 2309, 81537, 130399, 5340, 54205, 9181,…	2278	602	13528	1.43038	0.0154498	4.63394e-05	0.00647295
GOTERM_BP_FAT	GO:0070507~regulation of microtubule cytoskeleton organization	21	0.870647	3.58894e-06	220134, 7514, 7013, 672, 4869, 11190, 324, 22919, 1027, 7472, 1062, 440577, 1499, 667, 729012, 348235, 79959, 9181, 10013, 23122, 10733, 23332, 9475	2278	42	13528	2.96927	0.0161265	4.82419e-05	0.00675876
GOTERM_BP_FAT	GO:0030030~cell projection organization	97	4.02156	3.62376e-06	79902, 7060, 3480, 80184, 9148, 885, 538, 886, 6093, 4218, 5747, 8399, 1902, 1385, 3691, 207, 3717, 89846, 7410, 6608, 25970, 728590, 84894, 1813, 3912, 55558, 4690, 6285, 8650, 5048, 81565, 4803, 8440, 4804, 65078, 8851, 5154, 5155, 26052, 324, 2775, 491, 6387, 121512, 88, 998, 999, 5781, 5578, 4851, 7249, 2475, 2245, 221472, 7852, 5116, 2064, 89780, 5880, 2065, 5881, 5604, 25937, 7311, 2260, 47…	2278	368	13528	1.56532	0.0162817	4.85659e-05	0.00682433
GOTERM_BP_FAT	GO:0035295~tube development	65	2.69486	3.66206e-06	5950, 4855, 3280, 9241, 4851, 8928, 2254, 57534, 2683, 7249, 3479, 2252, 1392, 10395, 8323, 2246, 2247, 7852, 538, 89780, 1856, 5744, 2321, 3791, 7976, 2264, 2719, 1906, 1909, 7248, 2255, 8829, 5499, 54361, 2909, 4089, 5125, 4087, 2033, 5664, 10672, 7472, 1950, 7474, 1499, 7189, 8817, 7422, 7048, 10018, 1544, 7046, 659, 657, 5154, 10253, 10252, 5156, 93, 650, 6667, 5727, 7050, 6387, 183	2278	220	13528	1.75457	0.0164523	4.89343e-05	0.00689645
GOTERM_BP_FAT	GO:0051783~regulation of nuclear division	25	1.03648	4.05494e-06	8881, 8697, 685, 940, 3479, 1950, 9700, 2069, 10393, 3481, 723961, 3630, 699, 7013, 9088, 324, 1062, 1906, 1908, 995, 651610, 472, 4751, 1814, 3643, 10783, 4085, 998	2278	56	13528	2.65114	0.0182012	5.40248e-05	0.00763632
GOTERM_BP_FAT	GO:0007088~regulation of mitosis	25	1.03648	4.05494e-06	8881, 8697, 685, 940, 3479, 1950, 9700, 2069, 10393, 3481, 723961, 3630, 699, 7013, 9088, 324, 1062, 1906, 1908, 995, 651610, 472, 4751, 1814, 3643, 10783, 4085, 998	2278	56	13528	2.65114	0.0182012	5.40248e-05	0.00763632
GOTERM_BP_FAT	GO:0051053~negative regulation of DNA metabolic process	20	0.829187	4.09994e-06	651921, 2067, 7014, 648152, 81620, 7013, 5884, 5883, 2072, 26277, 51053, 8318, 3364, 7157, 54386, 7040, 3060, 990, 545, 25913, 7270, 65057	2278	39	13528	3.04541	0.0184014	5.44642e-05	0.00772106
GOTERM_BP_FAT	GO:0060326~cell chemotaxis	20	0.829187	4.09994e-06	1910, 3672, 5155, 5578, 5196, 2921, 6347, 3684, 79902, 1907, 6352, 1908, 6376, 6850, 3689, 58191, 3579, 3576, 5319, 5159	2278	39	13528	3.04541	0.0184014	5.44642e-05	0.00772106
GOTERM_BP_FAT	GO:0031646~positive regulation of neurological system process	20	0.829187	4.09994e-06	2066, 135, 3673, 84634, 1956, 10874, 1286, 5021, 6507, 6347, 5020, 6233, 7311, 3908, 6869, 3060, 5590, 6863, 728590, 1812, 4915	2278	39	13528	3.04541	0.0184014	5.44642e-05	0.00772106
GOTERM_BP_FAT	GO:0019226~transmission of nerve impulse	93	3.85572	4.1053e-06	2914, 2915, 2912, 2913, 2918, 2916, 4852, 5578, 2917, 11255, 5021, 5020, 1392, 2911, 5368, 378708, 2247, 5327, 4923, 2902, 2903, 5747, 2064, 2904, 2905, 5173, 375790, 1133, 2906, 1286, 1325, 1901, 6506, 4889, 6507, 477, 5367, 7311, 348, 3352, 4544, 3351, 3354, 10911, 7248, 728590, 1812, 1813, 1814, 6014, 1816, 56923, 10142, 5594, 134, 135, 6750, 1742, 7476, 5048, 53358, 27115, 7472, 1128, 3362, 3…	2278	350	13528	1.57796	0.0184252	5.43759e-05	0.00773115
GOTERM_BP_FAT	GO:0030819~positive regulation of cAMP biosynthetic process	10	0.414594	4.24395e-06	135, 5744, 136, 1812, 5741, 2692, 1816, 122042, 2691, 551	2278	11	13528	5.39868	0.0190415	5.60484e-05	0.00799225
GOTERM_BP_FAT	GO:0031293~membrane protein intracellular domain proteolysis	10	0.414594	4.24395e-06	7189, 6868, 83464, 5970, 55851, 5664, 23385, 4804, 4790, 51107	2278	11	13528	5.39868	0.0190415	5.60484e-05	0.00799225
GOTERM_BP_FAT	GO:0030816~positive regulation of cAMP metabolic process	10	0.414594	4.24395e-06	135, 5744, 136, 1812, 5741, 2692, 1816, 122042, 2691, 551	2278	11	13528	5.39868	0.0190415	5.60484e-05	0.00799225
GOTERM_BP_FAT	GO:0007213~muscarinic acetylcholine receptor signaling pathway	10	0.414594	4.24395e-06	2771, 8851, 2782, 375790, 1133, 1131, 2769, 1128, 1129, 156	2278	11	13528	5.39868	0.0190415	5.60484e-05	0.00799225
GOTERM_BP_FAT	GO:0000187~activation of MAPK activity	32	1.3267	4.27086e-06	2914, 10818, 84432, 2357, 5781, 136, 60675, 6464, 2911, 2785, 150, 728, 727, 151, 6850, 2247, 5562, 7852, 3672, 5604, 2690, 1902, 23566, 9294, 51738, 5291, 9170, 2549, 3643, 121512, 7057, 5319	2278	82	13528	2.31748	0.0191611	5.62398e-05	0.00804292
GOTERM_BP_FAT	GO:0003006~reproductive developmental process	74	3.06799	4.46038e-06	5950, 3640, 682, 9241, 2254, 2683, 2252, 10388, 3625, 3726, 3624, 2475, 3480, 9148, 7852, 2067, 3714, 3306, 5321, 3791, 3815, 1081, 1586, 122042, 207, 1907, 1594, 6198, 9702, 3955, 6696, 8312, 54361, 7840, 6777, 6776, 3643, 9985, 7476, 5048, 2069, 7422, 4090, 5139, 10468, 10018, 4093, 595, 657, 658, 5729, 5241, 5156, 2309, 92, 653882, 1738, 5568, 2488, 26271, 2693, 50511, 51738, 3972, 57082, 6387…	2278	262	13528	1.6773	0.0200028	5.85651e-05	0.0083998
GOTERM_BP_FAT	GO:0032231~regulation of actin filament bundle formation	14	0.580431	4.47162e-06	154796, 84634, 5588, 395, 116985, 7249, 1901, 10395, 2475, 6869, 6863, 7248, 387, 4088	2278	21	13528	3.95903	0.0200527	5.85431e-05	0.00842098
GOTERM_BP_FAT	GO:0046887~positive regulation of hormone secretion	19	0.787728	4.59174e-06	5950, 84634, 5781, 10874, 1385, 3625, 2692, 1392, 2691, 8843, 5715, 1906, 3624, 3717, 1907, 51738, 1908, 7200, 1813, 338442	2278	36	13528	3.13423	0.0205858	5.99424e-05	0.00864718
GOTERM_BP_FAT	GO:0007612~learning	26	1.07794	4.7513e-06	2914, 2902, 5153, 3265, 2903, 23236, 2904, 147, 1742, 11255, 2917, 5577, 653882, 3845, 3815, 478, 477, 351, 1020, 6869, 4893, 6863, 1812, 2534, 1813, 1814, 1816	2278	60	13528	2.57337	0.0212935	6.18471e-05	0.00894765
GOTERM_BP_FAT	GO:0044062~regulation of excretion	9	0.373134	4.8828e-06	6869, 2837, 183, 6863, 685, 185, 5020, 552, 551	2278	9	13528	5.93854	0.0218763	6.33767e-05	0.00919529
GOTERM_BP_FAT	GO:0043536~positive regulation of blood vessel endothelial cell migration	9	0.373134	4.8828e-06	51564, 154796, 7040, 7422, 5155, 2247, 7424, 9734, 7057	2278	9	13528	5.93854	0.0218763	6.33767e-05	0.00919529
GOTERM_BP_FAT	GO:0008542~visual learning	16	0.66335	5.36455e-06	2902, 3265, 2903, 5153, 147, 653882, 3815, 3845, 478, 477, 351, 1020, 4893, 1812, 1813, 1814, 1816	2278	27	13528	3.51914	0.0240086	6.94304e-05	0.0101025
GOTERM_BP_FAT	GO:0034097~response to cytokine stimulus	31	1.28524	5.45993e-06	6774, 6772, 5578, 5970, 5021, 8767, 8651, 3726, 1499, 6352, 4615, 1030, 9021, 102, 3654, 4314, 6714, 1281, 5156, 5322, 9759, 2690, 5532, 836, 2775, 1594, 2829, 3643, 58191, 6778, 898	2278	79	13528	2.33031	0.0244302	7.04635e-05	0.0102821
GOTERM_BP_FAT	GO:0043278~response to morphine	12	0.497512	5.72315e-06	1909, 2902, 6869, 147, 6863, 5970, 1813, 2690, 1814, 6870, 5520, 2775	2278	16	13528	4.45391	0.0255927	7.36505e-05	0.0107777
GOTERM_BP_FAT	GO:0014072~response to isoquinoline alkaloid	12	0.497512	5.72315e-06	1909, 2902, 6869, 147, 6863, 5970, 1813, 2690, 1814, 6870, 5520, 2775	2278	16	13528	4.45391	0.0255927	7.36505e-05	0.0107777
GOTERM_BP_FAT	GO:0030031~cell projection assembly	32	1.3267	5.72847e-06	5108, 79902, 7060, 727758, 4983, 221472, 2245, 8440, 9148, 8481, 3655, 6093, 4218, 5116, 5880, 5154, 5155, 5881, 26052, 1902, 23566, 3691, 1874, 89846, 7410, 25970, 7840, 121512, 5879, 10451, 998, 88, 4690	2278	83	13528	2.28956	0.0256162	7.35102e-05	0.0107878
GOTERM_BP_FAT	GO:0050900~leukocyte migration	25	1.03648	5.8935e-06	1910, 5578, 2683, 6347, 3684, 79902, 3383, 6352, 6376, 6850, 727758, 6370, 3579, 3655, 3576, 6093, 3672, 5155, 5196, 2921, 1907, 1908, 7412, 3689, 58191, 5319	2278	57	13528	2.60462	0.0263444	7.54142e-05	0.0110985
GOTERM_BP_FAT	GO:0050767~regulation of neurogenesis	52	2.15589	6.52293e-06	388585, 4854, 3280, 9241, 4851, 57534, 60436, 387, 53637, 2902, 5747, 55755, 3815, 5364, 348, 4747, 4974, 28514, 10371, 6608, 8829, 6696, 7074, 84894, 1813, 1814, 4086, 55558, 5970, 7476, 8650, 81565, 7040, 4803, 1840, 7424, 4099, 4804, 8997, 65078, 57142, 657, 8851, 653882, 650, 7157, 7050, 9138, 396, 894, 7532, 4915, 4067	2278	166	13528	1.86027	0.0291167	8.32331e-05	0.0122838
GOTERM_BP_FAT	GO:0032846~positive regulation of homeostatic process	20	0.829187	6.58146e-06	7014, 2147, 5321, 26277, 5020, 1909, 6352, 6869, 3973, 6863, 623, 6696, 25913, 4160, 1812, 885, 552, 553, 5319, 551	2278	40	13528	2.96927	0.0293741	8.37441e-05	0.012394
GOTERM_BP_FAT	GO:0031346~positive regulation of cell projection organization	22	0.912106	7.29402e-06	3673, 5588, 5898, 653882, 116985, 8650, 3815, 324, 5364, 2475, 4747, 81565, 23433, 387, 4803, 9138, 7074, 396, 4804, 7046, 5879, 998, 4086	2278	47	13528	2.77974	0.0325021	9.25504e-05	0.0137358
GOTERM_BP_FAT	GO:0030595~leukocyte chemotaxis	19	0.787728	7.53911e-06	1910, 3672, 5155, 5578, 5196, 6347, 2921, 3684, 79902, 1907, 6352, 1908, 6376, 6850, 3689, 58191, 3579, 3576, 5319	2278	37	13528	3.04952	0.0335757	9.53929e-05	0.0141973
GOTERM_BP_FAT	GO:0046626~regulation of insulin receptor signaling pathway	13	0.538972	7.87557e-06	6714, 5578, 5970, 7249, 2931, 8651, 3481, 5590, 2887, 3667, 5770, 723961, 9021, 3630, 5580	2278	19	13528	4.06321	0.0350476	9.93724e-05	0.0148309
GOTERM_BP_FAT	GO:0042493~response to drug	63	2.61194	8.27602e-06	6774, 6772, 5021, 6347, 336, 8841, 51083, 3726, 6352, 6868, 6565, 2066, 2903, 2064, 2065, 4036, 6506, 3551, 476, 6507, 1385, 478, 6198, 1812, 1813, 1814, 7386, 4086, 6750, 5141, 2033, 5970, 8651, 7472, 1026, 3356, 7040, 3358, 2837, 4803, 5139, 9021, 7048, 1543, 595, 3673, 5728, 5154, 9420, 324, 9759, 2778, 5727, 495, 2775, 7157, 3973, 3066, 2869, 4067, 3932, 898, 999	2278	216	13528	1.73207	0.0367965	0.000104135	0.0155849
GOTERM_BP_FAT	GO:0050806~positive regulation of synaptic transmission	18	0.746269	8.46017e-06	2066, 135, 84634, 1956, 10874, 1286, 5021, 6507, 6347, 5020, 6233, 7311, 3908, 6869, 5590, 6863, 728590, 1812, 4915	2278	34	13528	3.14393	0.0375996	0.000106157	0.0159317
GOTERM_BP_FAT	GO:0002027~regulation of heart rate	14	0.580431	9.24329e-06	147, 5020, 6870, 5367, 1906, 1907, 1908, 153, 10371, 6863, 186, 1813, 552, 553	2278	22	13528	3.77907	0.0410078	0.000115663	0.0174063
GOTERM_BP_FAT	GO:0006171~cAMP biosynthetic process	11	0.456053	9.28772e-06	135, 114, 133, 115, 112, 113, 109, 108, 107, 111, 196883	2278	14	13528	4.666	0.0412008	0.000115898	0.0174899
GOTERM_BP_FAT	GO:0008016~regulation of heart contraction	30	1.24378	9.40608e-06	134, 5578, 2740, 5020, 6870, 156, 1129, 1573, 488, 154, 153, 552, 553, 4092, 146, 147, 476, 477, 5367, 2775, 1906, 3717, 1907, 1908, 10371, 6863, 186, 1813, 1839, 140	2278	77	13528	2.31372	0.0417147	0.000117053	0.0177128
GOTERM_BP_FAT	GO:0045833~negative regulation of lipid metabolic process	16	0.66335	9.75739e-06	134, 5140, 5154, 5155, 672, 476, 344, 336, 345, 207, 8843, 348, 3481, 5562, 723961, 3630, 4790, 338442, 9965	2278	28	13528	3.39345	0.0432386	0.000121092	0.0183743
GOTERM_BP_FAT	GO:0034621~cellular macromolecular complex subunit organization	93	3.85572	9.79701e-06	55746, 128312, 3084, 64946, 154, 284119, 4928, 374291, 3013, 3012, 51773, 79003, 5747, 7280, 375790, 7283, 723790, 11004, 8294, 8290, 4690, 113457, 5618, 7514, 347733, 56034, 2266, 440577, 7040, 25909, 3320, 121504, 8440, 84790, 554313, 81027, 395, 3018, 8370, 916, 1062, 26271, 3014, 3015, 4171, 9372, 3017, 2280, 1058, 84617, 203068, 85236, 7846, 647000, 8467, 10382, 10383, 10381, 8360, 2244, 836…	2278	357	13528	1.54702	0.0434103	0.000121251	0.0184489
GOTERM_BP_FAT	GO:0009411~response to UV	25	1.03648	1.20024e-05	842, 5599, 1956, 5970, 2072, 2071, 4734, 2073, 1026, 3364, 1032, 2068, 10381, 1643, 4157, 595, 2067, 653238, 5424, 7508, 207, 836, 7507, 7157, 2966, 2237, 4221	2278	59	13528	2.51633	0.0529194	0.000148139	0.0226014
GOTERM_BP_FAT	GO:0009187~cyclic nucleotide metabolic process	19	0.787728	1.20787e-05	5151, 135, 5140, 114, 115, 133, 5141, 112, 113, 5744, 5144, 111, 196883, 491, 8622, 109, 108, 107, 5741	2278	38	13528	2.96927	0.0532469	0.000148676	0.0227452
GOTERM_BP_FAT	GO:0048732~gland development	44	1.82421	1.25408e-05	4855, 5618, 3280, 3084, 1956, 9241, 2683, 5021, 3479, 5617, 7472, 1392, 335, 3480, 7040, 9148, 7046, 10018, 10718, 2066, 137964, 2064, 89780, 3673, 5241, 2065, 5744, 1081, 1385, 8660, 2692, 5727, 2691, 5367, 540, 491, 1399, 59350, 2255, 3667, 6777, 6776, 1813, 999	2278	135	13528	1.93552	0.0552265	0.000153945	0.0236152
GOTERM_BP_FAT	GO:0030278~regulation of ossification	30	1.24378	1.25882e-05	9365, 57154, 5734, 7477, 5020, 8074, 154, 1499, 8321, 7040, 4090, 6497, 51564, 659, 657, 658, 93, 5321, 92, 11243, 799, 324, 796, 650, 632, 2778, 1594, 1021, 4088, 4221, 4086	2278	78	13528	2.28405	0.0554293	0.000154109	0.0237044
GOTERM_BP_FAT	GO:0045926~negative regulation of growth	38	1.57546	1.2711e-05	11108, 1029, 1027, 1026, 2786, 155, 3624, 154, 1032, 153, 7040, 1031, 623, 2247, 5515, 5518, 2395, 57142, 5747, 91, 5925, 1081, 51079, 5727, 2719, 4722, 7157, 1594, 10371, 183, 6696, 8829, 186, 4088, 4221, 4089, 3421, 55558	2278	110	13528	2.0515	0.0559548	0.000155193	0.0239357
GOTERM_BP_FAT	GO:0032228~regulation of synaptic transmission, GABAergic	12	0.497512	1.37395e-05	134, 2066, 135, 3351, 3265, 6869, 4893, 6863, 5021, 4889, 1813, 3845	2278	17	13528	4.19191	0.0603429	0.000167298	0.0258721
GOTERM_BP_FAT	GO:0051482~elevation of cytosolic calcium ion concentration during G-protein signaling, coupled to IP3 second messenger (phospholipase C activating)	10	0.414594	1.44217e-05	1909, 2149, 185, 1812, 1813, 1901, 796, 23566, 1906, 51289	2278	12	13528	4.94879	0.0632423	0.000175134	0.0271565
GOTERM_BP_FAT	GO:0042698~ovulation cycle	27	1.1194	1.44588e-05	1956, 5021, 2252, 3625, 3624, 2069, 7422, 2064, 658, 5241, 5321, 2309, 4889, 3791, 2488, 650, 2796, 1907, 2491, 2492, 3955, 3973, 183, 6777, 894, 6776, 898	2278	67	13528	2.39314	0.0633998	0.000175115	0.0272264
GOTERM_BP_FAT	GO:0001649~osteoblast differentiation	20	0.829187	1.59133e-05	2550, 5745, 5744, 11243, 9241, 2254, 51741, 25937, 3479, 632, 650, 442194, 3481, 1591, 6608, 6696, 4088, 1277, 4090, 4221, 723961, 3630, 4086	2278	42	13528	2.82788	0.0695509	0.000192216	0.029965
GOTERM_BP_FAT	GO:0050886~endocrine process	14	0.580431	1.79812e-05	51738, 1908, 183, 185, 186, 1814, 1081, 552, 1816, 553, 1906, 5125, 1585, 1907	2278	23	13528	3.61477	0.0782265	0.000216614	0.0338583
GOTERM_BP_FAT	GO:0042755~eating behavior	14	0.580431	1.79812e-05	135, 6774, 10874, 11255, 51052, 5021, 4889, 5020, 6869, 3060, 1812, 885, 7200, 56923	2278	23	13528	3.61477	0.0782265	0.000216614	0.0338583
GOTERM_BP_FAT	GO:0046888~negative regulation of hormone secretion	15	0.621891	1.7983e-05	134, 5781, 130399, 3625, 8074, 5715, 1906, 4886, 2693, 1907, 3624, 51738, 1908, 8622, 10468	2278	26	13528	3.42608	0.0782339	0.000216061	0.0338616
GOTERM_BP_FAT	GO:0050880~regulation of blood vessel size	23	0.953566	1.87935e-05	135, 1910, 3672, 146, 147, 136, 3827, 797, 7472, 1906, 155, 348, 1907, 154, 1909, 153, 1908, 183, 185, 186, 1816, 4922, 551	2278	53	13528	2.5771	0.081612	0.0002252	0.0353875
GOTERM_BP_FAT	GO:0035150~regulation of tube size	23	0.953566	1.87935e-05	135, 1910, 3672, 146, 147, 136, 3827, 797, 7472, 1906, 155, 348, 1907, 154, 1909, 153, 1908, 183, 185, 186, 1816, 4922, 551	2278	53	13528	2.5771	0.081612	0.0002252	0.0353875
GOTERM_BP_FAT	GO:0045834~positive regulation of lipid metabolic process	21	0.870647	1.97423e-05	5321, 344, 8660, 336, 207, 208, 335, 348, 2693, 3481, 7040, 7410, 183, 185, 5562, 3667, 723961, 3630, 552, 10451, 5879, 998, 551	2278	46	13528	2.71107	0.0855509	0.000235944	0.0371737
GOTERM_BP_FAT	GO:0043550~regulation of lipid kinase activity	9	0.373134	2.07797e-05	7040, 7410, 5934, 3667, 5933, 5925, 10451, 5879, 998	2278	10	13528	5.34469	0.0898384	0.000247688	0.0391268
GOTERM_BP_FAT	GO:0032925~regulation of activin receptor signaling pathway	9	0.373134	2.07797e-05	2280, 23592, 93, 92, 91, 4221, 6497, 4092, 3624	2278	10	13528	5.34469	0.0898384	0.000247688	0.0391268
GOTERM_BP_FAT	GO:0051930~regulation of sensory perception of pain	9	0.373134	2.07797e-05	1910, 3358, 2903, 2149, 2906, 885, 5020, 2911, 154	2278	10	13528	5.34469	0.0898384	0.000247688	0.0391268
GOTERM_BP_FAT	GO:0051931~regulation of sensory perception	9	0.373134	2.07797e-05	1910, 3358, 2903, 2149, 2906, 885, 5020, 2911, 154	2278	10	13528	5.34469	0.0898384	0.000247688	0.0391268
GOTERM_BP_FAT	GO:0048585~negative regulation of response to stimulus	35	1.45108	2.18007e-05	134, 135, 5578, 5970, 2931, 8651, 8841, 10203, 1392, 2475, 154, 3481, 7040, 885, 723961, 3630, 9021, 5580, 2902, 9611, 1281, 5532, 207, 348, 2693, 51738, 2, 2887, 5590, 6696, 3667, 4221, 1812, 5770, 1813, 1814, 6778	2278	100	13528	2.07849	0.0940383	0.000259174	0.0410488
GOTERM_BP_FAT	GO:0043933~macromolecular complex subunit organization	162	6.71642	2.29445e-05	5437, 338, 55746, 128312, 3084, 336, 64946, 154, 335, 4928, 3480, 374291, 284119, 3013, 3012, 1387, 5440, 6498, 8527, 6497, 51773, 79003, 5747, 7280, 375790, 673, 7283, 3710, 4193, 344, 345, 9735, 348, 723790, 11004, 3915, 8294, 9054, 8290, 4609, 4690, 113457, 4023, 7514, 5618, 347733, 56034, 2071, 2266, 440577, 2068, 7040, 25909, 3320, 5564, 121504, 5563, 8440, 84790, 1645, 554313, 81027, 7529, …	2278	710	13528	1.35499	0.0987205	0.000272057	0.0432021
GOTERM_BP_FAT	GO:0030801~positive regulation of cyclic nucleotide metabolic process	11	0.456053	2.36405e-05	135, 5744, 136, 1812, 5741, 2692, 1816, 122042, 2691, 551, 348	2278	15	13528	4.35493	0.101558	0.000279577	0.0445124
GOTERM_BP_FAT	GO:0030810~positive regulation of nucleotide biosynthetic process	11	0.456053	2.36405e-05	135, 5744, 136, 1812, 5741, 2692, 1816, 122042, 2691, 551, 348	2278	15	13528	4.35493	0.101558	0.000279577	0.0445124
GOTERM_BP_FAT	GO:0045981~positive regulation of nucleotide metabolic process	11	0.456053	2.36405e-05	135, 5744, 136, 1812, 5741, 2692, 1816, 122042, 2691, 551, 348	2278	15	13528	4.35493	0.101558	0.000279577	0.0445124
GOTERM_BP_FAT	GO:0030804~positive regulation of cyclic nucleotide biosynthetic process	11	0.456053	2.36405e-05	135, 5744, 136, 1812, 5741, 2692, 1816, 122042, 2691, 551, 348	2278	15	13528	4.35493	0.101558	0.000279577	0.0445124
GOTERM_BP_FAT	GO:0002687~positive regulation of leukocyte migration	11	0.456053	2.36405e-05	1908, 6387, 3673, 6868, 7422, 623, 2150, 102, 7057, 3383, 1907	2278	15	13528	4.35493	0.101558	0.000279577	0.0445124
GOTERM_BP_FAT	GO:0006939~smooth muscle contraction	17	0.704809	2.55792e-05	6752, 1910, 148, 5144, 3827, 10316, 1906, 51083, 1907, 1909, 1908, 6869, 183, 1131, 1812, 1813, 624	2278	33	13528	3.05925	0.109414	0.000301713	0.0481619
GOTERM_BP_FAT	GO:0032205~negative regulation of telomere maintenance	8	0.331675	2.59215e-05	2067, 7014, 7013, 25913, 2072, 26277, 65057, 54386	2278	8	13528	5.93854	0.110794	0.000304956	0.0488062
GOTERM_BP_FAT	GO:0060396~growth hormone receptor signaling pathway	8	0.331675	2.59215e-05	8835, 6774, 2688, 6777, 6776, 2690, 5295, 3717	2278	8	13528	5.93854	0.110794	0.000304956	0.0488062
GOTERM_BP_FAT	GO:0003078~regulation of natriuresis	8	0.331675	2.59215e-05	6869, 2837, 183, 6863, 185, 5020, 552, 551	2278	8	13528	5.93854	0.110794	0.000304956	0.0488062
GOTERM_BP_FAT	GO:0031099~regeneration	27	1.1194	2.65892e-05	133, 4854, 4853, 4851, 3479, 6347, 8651, 336, 1026, 3358, 7040, 9021, 7046, 595, 890, 5588, 4036, 2243, 10076, 5054, 5340, 4747, 3717, 6608, 2255, 891, 898	2278	69	13528	2.32378	0.113479	0.000312	0.0500631
GOTERM_BP_FAT	GO:0032355~response to estradiol stimulus	23	0.953566	2.671e-05	5728, 5154, 890, 5155, 6774, 5156, 5578, 5021, 2690, 5020, 8651, 6870, 5727, 4886, 6790, 7040, 8835, 2688, 6777, 894, 3643, 9021, 898	2278	54	13528	2.52938	0.113964	0.000312608	0.0502905
GOTERM_BP_FAT	GO:0010769~regulation of cell morphogenesis involved in differentiation	29	1.20232	2.84378e-05	8650, 7476, 81565, 7040, 4803, 387, 4099, 4804, 4092, 65078, 2902, 57142, 5747, 5364, 4747, 348, 4974, 10371, 8829, 6696, 9138, 7074, 4088, 396, 84894, 4089, 4086, 55558, 4087	2278	77	13528	2.23659	0.120872	0.000331968	0.0535427
GOTERM_BP_FAT	GO:0043467~regulation of generation of precursor metabolites and energy	16	0.66335	2.88413e-05	147, 3091, 5566, 9759, 3479, 8660, 207, 208, 2475, 3481, 5571, 5500, 3667, 538, 3643, 3630, 723961, 51422	2278	30	13528	3.16722	0.122478	0.000335812	0.0543022
GOTERM_BP_FAT	GO:0050729~positive regulation of inflammatory response	16	0.66335	2.88413e-05	3673, 5320, 5321, 5578, 136, 4889, 3717, 1909, 6352, 6376, 718, 6863, 183, 185, 6777, 6776, 653879	2278	30	13528	3.16722	0.122478	0.000335812	0.0543022
GOTERM_BP_FAT	GO:0048638~regulation of developmental growth	21	0.870647	2.89632e-05	5950, 57142, 375790, 3084, 1286, 9241, 2254, 6233, 23493, 7311, 348, 154, 10371, 6198, 8829, 2247, 4803, 6696, 728590, 3643, 7048, 55558	2278	47	13528	2.65339	0.122962	0.000336368	0.0545318
GOTERM_BP_FAT	GO:0051341~regulation of oxidoreductase activity	19	0.787728	2.90109e-05	2395, 1956, 92, 3091, 3845, 8074, 207, 1906, 348, 1907, 1594, 3481, 183, 185, 186, 10013, 538, 723961, 3630, 4790, 1816	2278	40	13528	2.82081	0.123152	0.00033606	0.0546215
GOTERM_BP_FAT	GO:0007507~heart development	61	2.52902	2.91455e-05	5950, 3084, 4851, 8928, 5021, 3339, 57534, 7249, 5020, 10203, 156, 10395, 3676, 1289, 2200, 2066, 1280, 89780, 1281, 2064, 2065, 1856, 5607, 1906, 836, 23509, 1909, 3688, 6608, 8828, 7248, 8829, 472, 3643, 9965, 5125, 4087, 4331, 133, 2033, 2767, 10087, 1499, 10014, 3357, 3516, 7048, 7046, 4092, 5728, 657, 147, 93, 4729, 9734, 2776, 650, 5727, 5532, 2280, 1399, 651610	2278	215	13528	1.68489	0.123686	0.000336757	0.0548749
GOTERM_BP_FAT	GO:0001525~angiogenesis	46	1.90713	2.97046e-05	4855, 84432, 1432, 60675, 4851, 2683, 2254, 10672, 2251, 8841, 1950, 1499, 2069, 8817, 151, 7422, 388, 2246, 3516, 2247, 7424, 7852, 7048, 3576, 506, 57142, 5747, 5728, 5154, 54567, 3091, 2321, 3791, 1901, 2277, 1906, 23509, 1909, 6387, 182, 8828, 2255, 8829, 58504, 83478, 7057	2278	148	13528	1.84576	0.125903	0.000342343	0.0559272
GOTERM_BP_FAT	GO:0051963~regulation of synaptogenesis	12	0.497512	2.99426e-05	2902, 5747, 375790, 5578, 1286, 7476, 5021, 5020, 6233, 2693, 7311, 51738, 728590	2278	18	13528	3.95903	0.126845	0.00034421	0.0563752
GOTERM_BP_FAT	GO:0030593~neutrophil chemotaxis	12	0.497512	2.99426e-05	1908, 3672, 6850, 3689, 5578, 2921, 3579, 6347, 3684, 5319, 3576, 1907	2278	18	13528	3.95903	0.126845	0.00034421	0.0563752
GOTERM_BP_FAT	GO:0009991~response to extracellular stimulus	62	2.57048	3.10096e-05	5950, 2642, 4852, 6772, 6347, 5020, 2475, 7252, 1583, 885, 886, 5321, 4036, 11243, 6506, 1327, 632, 57521, 207, 2, 1594, 6198, 1591, 6696, 27327, 1277, 3643, 58496, 6752, 6750, 6751, 133, 136, 5970, 1026, 1032, 2771, 7040, 1030, 2696, 10013, 1460, 9021, 7048, 1543, 552, 2029, 3655, 659, 595, 3673, 5728, 5154, 2690, 650, 5727, 2691, 7157, 2693, 51738, 3939, 1208, 4067, 898	2278	220	13528	1.67359	0.131055	0.000355572	0.0583837
GOTERM_BP_FAT	GO:0032845~negative regulation of homeostatic process	13	0.538972	3.29268e-05	2067, 7014, 7040, 2837, 7422, 7013, 25913, 2072, 65057, 26277, 796, 3375, 54386	2278	21	13528	3.67624	0.138569	0.000376597	0.0619921
GOTERM_BP_FAT	GO:0006259~DNA metabolic process	121	5.01658	3.34744e-05	7298, 8317, 3479, 8318, 4928, 10926, 10714, 65057, 81620, 23649, 672, 114799, 545, 472, 4221, 4609, 5931, 8243, 84296, 9985, 1453, 1454, 84126, 5557, 2072, 5558, 2071, 2073, 57804, 2068, 3516, 5422, 157570, 286826, 1643, 9978, 84515, 1642, 4173, 5427, 23594, 4172, 4175, 4174, 648152, 5155, 5424, 4176, 5425, 5426, 1111, 26277, 3014, 4171, 9232, 2966, 2965, 54205, 55388, 995, 651610, 993, 990, 5810…	2278	506	13528	1.42009	0.140704	0.000381895	0.0630228
GOTERM_BP_FAT	GO:0048634~regulation of muscle development	22	0.912106	3.34952e-05	5950, 375790, 3084, 1286, 9241, 4851, 9734, 2254, 9759, 8841, 6233, 23493, 7311, 154, 10014, 6198, 7040, 2247, 728590, 4088, 3065, 4804, 7048	2278	51	13528	2.56172	0.140785	0.000381173	0.063062
GOTERM_BP_FAT	GO:0014048~regulation of glutamate secretion	10	0.414594	3.98313e-05	134, 135, 2904, 11255, 2917, 7200, 4889, 552, 553, 551	2278	13	13528	4.56811	0.165097	0.000452127	0.0749869
GOTERM_BP_FAT	GO:0045822~negative regulation of heart contraction	10	0.414594	3.98313e-05	134, 146, 6863, 5578, 186, 476, 477, 156, 488, 3717	2278	13	13528	4.56811	0.165097	0.000452127	0.0749869
GOTERM_BP_FAT	GO:0034754~cellular hormone metabolic process	24	0.995025	4.08887e-05	5950, 133, 1109, 145226, 2488, 9227, 51109, 1586, 1392, 50700, 1585, 9249, 335, 1584, 3972, 1583, 1592, 2247, 340665, 5947, 6777, 1543, 1545, 56603	2278	59	13528	2.41568	0.169086	0.000462966	0.0769767
GOTERM_BP_FAT	GO:0000077~DNA damage checkpoint	21	0.870647	4.18499e-05	595, 651921, 11200, 4303, 648152, 890, 5781, 1432, 672, 5884, 5883, 1111, 84126, 80254, 3014, 7508, 3364, 7157, 983, 651610, 5810, 545, 472, 8525	2278	48	13528	2.59811	0.172697	0.000472667	0.0787857
GOTERM_BP_FAT	GO:0042060~wound healing	55	2.28027	4.87084e-05	2147, 64805, 4854, 2149, 4853, 3084, 9241, 4851, 3827, 2683, 7450, 2335, 3479, 2252, 3481, 6868, 2247, 2244, 3678, 9002, 5327, 1289, 2150, 3630, 723961, 2151, 1281, 2064, 2065, 5588, 3091, 3690, 5028, 2255, 4088, 1816, 4086, 135, 2768, 2266, 10672, 2069, 7040, 7048, 3673, 5154, 5155, 5156, 5196, 2776, 2243, 5054, 5340, 5291, 1839, 6382, 891	2278	191	13528	1.71005	0.198006	0.000548741	0.0916918
GOTERM_BP_FAT	GO:0034622~cellular macromolecular complex assembly	82	3.39967	5.07061e-05	128312, 3084, 154, 4928, 374291, 3013, 3012, 51773, 79003, 5747, 7280, 375790, 7283, 723790, 8294, 8290, 4690, 113457, 5618, 7514, 347733, 56034, 2266, 440577, 7040, 25909, 3320, 121504, 8440, 84790, 554313, 81027, 395, 3018, 8370, 916, 1062, 26271, 3014, 3015, 4171, 9372, 3017, 2280, 1058, 84617, 203068, 85236, 7846, 647000, 8467, 10382, 10383, 10381, 8360, 2244, 8362, 8361, 8364, 8363, 8366, 83…	2278	318	13528	1.53132	0.205231	0.000569823	0.0954505
GOTERM_BP_FAT	GO:0051495~positive regulation of cytoskeleton organization	20	0.829187	5.20579e-05	154796, 84634, 5588, 7013, 324, 1027, 7472, 1062, 1906, 2475, 64223, 6869, 6863, 387, 4088, 8440, 253260, 10733, 5879, 4690	2278	45	13528	2.63935	0.210084	0.000583563	0.0979941
GOTERM_BP_FAT	GO:0032319~regulation of Rho GTPase activity	15	0.621891	5.33869e-05	84144, 51291, 116985, 5048, 10928, 2475, 85360, 89846, 81565, 64223, 7248, 221472, 2245, 253260, 121512	2278	28	13528	3.18136	0.214825	0.00059698	0.100495
GOTERM_BP_FAT	GO:0045740~positive regulation of DNA replication	15	0.621891	5.33869e-05	3265, 5154, 5155, 5156, 6464, 1763, 56034, 3479, 3480, 2069, 3481, 4254, 25913, 3643, 723961, 3630, 5319	2278	28	13528	3.18136	0.214825	0.00059698	0.100495
GOTERM_BP_FAT	GO:0030104~water homeostasis	11	0.456053	5.35029e-05	135, 5733, 3827, 23327, 1813, 3479, 5020, 2692, 1906, 1585, 551	2278	16	13528	4.08275	0.215238	0.000596803	0.100713
GOTERM_BP_FAT	GO:0006308~DNA catabolic process	24	0.995025	5.584e-05	4331, 2072, 2071, 1029, 2073, 2068, 5887, 6117, 1643, 6119, 6118, 1642, 2067, 653238, 7508, 7507, 836, 2966, 2965, 54205, 1022, 902, 4609, 2968, 2967	2278	60	13528	2.37542	0.223503	0.000621336	0.10511
GOTERM_BP_FAT	GO:0050771~negative regulation of axonogenesis	14	0.580431	5.85043e-05	10371, 4974, 57142, 5747, 8829, 387, 6696, 9138, 4099, 84894, 396, 4804, 55558, 65078	2278	25	13528	3.32558	0.232819	0.000649377	0.110122
GOTERM_BP_FAT	GO:0040018~positive regulation of multicellular organism growth	14	0.580431	5.85043e-05	2690, 1385, 2692, 57678, 207, 2691, 2693, 7253, 51738, 2688, 183, 6777, 1813, 6776	2278	25	13528	3.32558	0.232819	0.000649377	0.110122
GOTERM_BP_FAT	GO:0048167~regulation of synaptic plasticity	25	1.03648	5.87883e-05	134, 135, 3265, 1742, 5664, 3845, 5327, 2902, 2903, 2904, 2905, 815, 653882, 3815, 5367, 6233, 348, 7311, 491, 1020, 4893, 183, 728590, 1812, 1813, 7532, 1816	2278	64	13528	2.31974	0.233805	0.000650934	0.110657
GOTERM_BP_FAT	GO:0032886~regulation of microtubule-based process	21	0.870647	5.96083e-05	220134, 7514, 7013, 672, 4869, 11190, 324, 22919, 1027, 7472, 1062, 440577, 1499, 667, 729012, 348235, 79959, 9181, 10013, 23122, 10733, 23332, 9475	2278	49	13528	2.54509	0.236646	0.000658402	0.112199
GOTERM_BP_FAT	GO:0014073~response to tropane	12	0.497512	6.02847e-05	3351, 1020, 2912, 147, 5021, 1812, 1813, 3066, 1814, 5020, 1816, 6870	2278	19	13528	3.75066	0.238982	0.000664251	0.113472
GOTERM_BP_FAT	GO:0001975~response to amphetamine	12	0.497512	6.02847e-05	135, 2902, 2903, 147, 5021, 1812, 1813, 1814, 5020, 1816, 5530, 2774	2278	19	13528	3.75066	0.238982	0.000664251	0.113472
GOTERM_BP_FAT	GO:0048008~platelet-derived growth factor receptor signaling pathway	12	0.497512	6.02847e-05	6714, 5728, 5154, 7422, 5155, 5156, 5327, 56034, 9564, 8879, 5159, 3717	2278	19	13528	3.75066	0.238982	0.000664251	0.113472
GOTERM_BP_FAT	GO:0042220~response to cocaine	12	0.497512	6.02847e-05	3351, 1020, 2912, 147, 5021, 1812, 1813, 3066, 1814, 5020, 1816, 6870	2278	19	13528	3.75066	0.238982	0.000664251	0.113472
GOTERM_BP_FAT	GO:0048010~vascular endothelial growth factor receptor signaling pathway	9	0.373134	6.48751e-05	659, 8829, 5156, 7424, 3791, 6347, 2277, 2324, 5159	2278	11	13528	4.85881	0.254644	0.00071308	0.122107
GOTERM_BP_FAT	GO:0032309~icosanoid secretion	9	0.373134	6.48751e-05	84634, 3973, 301, 5322, 1813, 1814, 624, 56923, 5319	2278	11	13528	4.85881	0.254644	0.00071308	0.122107
GOTERM_BP_FAT	GO:0050482~arachidonic acid secretion	9	0.373134	6.48751e-05	84634, 3973, 301, 5322, 1813, 1814, 624, 56923, 5319	2278	11	13528	4.85881	0.254644	0.00071308	0.122107
GOTERM_BP_FAT	GO:0008219~cell death	161	6.67496	6.88264e-05	4208, 2147, 4205, 2149, 6772, 9459, 440917, 5733, 487, 332, 5533, 5534, 3481, 25791, 116143, 8878, 885, 8879, 10133, 89941, 57761, 1894, 6093, 1285, 672, 55851, 23645, 7409, 207, 3717, 29, 89846, 7410, 4893, 23263, 3689, 8312, 7074, 728590, 472, 4790, 7204, 4792, 4609, 11083, 27018, 3845, 51107, 8655, 2068, 7189, 23421, 7040, 727, 83464, 10276, 4803, 4804, 10018, 5153, 57142, 7529, 393, 9420, 230…	2278	719	13528	1.32977	0.267868	0.000754665	0.12954
GOTERM_BP_FAT	GO:0010627~regulation of protein kinase cascade	67	2.77778	6.8952e-05	2914, 2149, 2254, 7249, 8767, 3479, 8841, 2911, 155, 154, 2475, 4615, 3481, 389, 387, 8878, 253260, 3630, 723961, 9146, 1894, 2064, 9611, 2065, 2904, 6453, 27032, 3551, 1902, 207, 1906, 208, 3717, 5494, 8312, 4221, 1813, 3643, 1814, 9965, 142678, 5970, 5617, 8651, 4734, 1499, 7189, 7040, 3357, 9218, 6850, 5515, 5518, 23118, 7046, 5728, 324, 2690, 23566, 2280, 9170, 2549, 2688, 183, 57449, 399, 12…	2278	249	13528	1.59792	0.268284	0.000754216	0.129776
GOTERM_BP_FAT	GO:0006418~tRNA aminoacylation for protein translation	20	0.829187	7.47985e-05	55157, 79587, 57505, 79731, 2617, 55699, 57176, 3735, 10352, 51067, 25973, 92935, 80222, 54938, 57038, 23438, 23395, 5859, 124454, 10667	2278	46	13528	2.58198	0.287411	0.000816172	0.140773
GOTERM_BP_FAT	GO:0007623~circadian rhythm	20	0.829187	7.47985e-05	23239, 50865, 2065, 129521, 1956, 9420, 60675, 1019, 128674, 1392, 3363, 2691, 5367, 540, 4543, 51738, 2837, 1812, 1813, 1814	2278	46	13528	2.58198	0.287411	0.000816172	0.140773
GOTERM_BP_FAT	GO:0043038~amino acid activation	20	0.829187	7.47985e-05	55157, 79587, 57505, 79731, 2617, 55699, 57176, 3735, 10352, 51067, 25973, 92935, 80222, 54938, 57038, 23438, 23395, 5859, 124454, 10667	2278	46	13528	2.58198	0.287411	0.000816172	0.140773
GOTERM_BP_FAT	GO:0048660~regulation of smooth muscle cell proliferation	20	0.829187	7.47985e-05	3673, 4331, 4855, 5155, 5578, 1956, 6772, 2321, 1901, 4889, 3479, 10203, 1906, 2069, 6198, 7422, 10554, 6777, 1839, 7048	2278	46	13528	2.58198	0.287411	0.000816172	0.140773
GOTERM_BP_FAT	GO:0043039~tRNA aminoacylation	20	0.829187	7.47985e-05	55157, 79587, 57505, 79731, 2617, 55699, 57176, 3735, 10352, 51067, 25973, 92935, 80222, 54938, 57038, 23438, 23395, 5859, 124454, 10667	2278	46	13528	2.58198	0.287411	0.000816172	0.140773
GOTERM_BP_FAT	GO:0009583~detection of light stimulus	18	0.746269	7.91601e-05	5950, 2652, 2916, 24, 2779, 728458, 10692, 5995, 2780, 408, 94233, 2792, 221391, 2793, 611, 5956, 7222, 6010, 23596	2278	39	13528	2.74087	0.301353	0.000861671	0.148975
GOTERM_BP_FAT	GO:0031960~response to corticosteroid stimulus	30	1.24378	7.96845e-05	133, 5578, 2033, 3845, 6347, 5020, 1026, 336, 3726, 6352, 4803, 552, 595, 6714, 5321, 5604, 799, 2690, 2692, 2796, 10076, 4747, 2, 3351, 6198, 1277, 7200, 3643, 6382, 898	2278	85	13528	2.09596	0.303011	0.000865298	0.149962
GOTERM_BP_FAT	GO:0016202~regulation of striated muscle tissue development	21	0.870647	8.37568e-05	5950, 375790, 3084, 1286, 9241, 4851, 9734, 2254, 9759, 8841, 6233, 23493, 7311, 154, 10014, 6198, 7040, 2247, 728590, 4088, 3065, 7048	2278	50	13528	2.49419	0.315752	0.000907326	0.15762
GOTERM_BP_FAT	GO:0042476~odontogenesis	22	0.912106	9.11315e-05	2066, 657, 3714, 2065, 1147, 93, 5156, 682, 11243, 632, 650, 1499, 7189, 7040, 2249, 6608, 1277, 10468, 6382, 1278, 3912, 10018, 3655	2278	54	13528	2.41941	0.338235	0.000984824	0.171487
GOTERM_BP_FAT	GO:0001503~ossification	37	1.534	9.26213e-05	1290, 5599, 1956, 9241, 2254, 3339, 3479, 3381, 846, 2068, 7189, 3481, 7040, 8817, 4090, 723961, 3630, 1280, 2550, 5745, 5744, 11243, 51741, 91851, 25937, 650, 632, 2778, 6667, 50617, 1594, 1591, 442194, 6608, 6696, 4088, 1277, 4221, 525, 4086	2278	115	13528	1.91066	0.342686	0.000998534	0.174288
GOTERM_BP_FAT	GO:0045667~regulation of osteoblast differentiation	19	0.787728	9.34753e-05	51564, 659, 657, 658, 93, 92, 324, 7477, 650, 2778, 8074, 1499, 1021, 8321, 4088, 4090, 4221, 6497, 4086	2278	43	13528	2.62401	0.345225	0.00100534	0.175894
GOTERM_BP_FAT	GO:0045823~positive regulation of heart contraction	10	0.414594	9.48098e-05	1908, 153, 147, 476, 552, 6870, 553, 1906, 154, 1907	2278	14	13528	4.24182	0.349171	0.00101728	0.178402
GOTERM_BP_FAT	GO:0007617~mating behavior	10	0.414594	9.48098e-05	4543, 2902, 1583, 1812, 5020, 552, 1816, 84152, 351, 551	2278	14	13528	4.24182	0.349171	0.00101728	0.178402
GOTERM_BP_FAT	GO:0016265~death	161	6.67496	9.83638e-05	4208, 2147, 4205, 2149, 6772, 9459, 440917, 5733, 487, 332, 5533, 5534, 3481, 25791, 116143, 8878, 885, 8879, 10133, 89941, 57761, 1894, 6093, 1285, 672, 55851, 23645, 7409, 207, 3717, 29, 89846, 7410, 4893, 23263, 3689, 8312, 7074, 728590, 472, 4790, 7204, 4792, 4609, 11083, 27018, 3845, 51107, 8655, 2068, 7189, 23421, 7040, 727, 83464, 10276, 4803, 4804, 10018, 5153, 57142, 7529, 393, 9420, 230…	2278	724	13528	1.32059	0.359566	0.0010529	0.185084
GOTERM_BP_FAT	GO:0051353~positive regulation of oxidoreductase activity	14	0.580431	9.90255e-05	2395, 3091, 3845, 8074, 207, 1906, 1907, 348, 1594, 3481, 183, 185, 186, 538, 723961, 3630	2278	26	13528	3.19768	0.361484	0.00105748	0.186328
GOTERM_BP_FAT	GO:0031100~organ regeneration	14	0.580431	9.90255e-05	595, 133, 890, 4036, 6347, 8651, 336, 1026, 10076, 7040, 3358, 9021, 7046, 898	2278	26	13528	3.19768	0.361484	0.00105748	0.186328
GOTERM_BP_FAT	GO:0043491~protein kinase B signaling cascade	8	0.331675	9.9557e-05	5290, 6198, 6199, 64805, 84894, 7249, 3667, 207	2278	9	13528	5.2787	0.363019	0.00106065	0.187327
GOTERM_BP_FAT	GO:0043537~negative regulation of blood vessel endothelial cell migration	8	0.331675	9.9557e-05	10014, 7040, 2247, 54567, 186, 7057, 5340, 348	2278	9	13528	5.2787	0.363019	0.00106065	0.187327
GOTERM_BP_FAT	GO:0015991~ATP hydrolysis coupled proton transport	8	0.331675	9.9557e-05	480, 8992, 529, 477, 495, 50617, 51606, 90423	2278	9	13528	5.2787	0.363019	0.00106065	0.187327
GOTERM_BP_FAT	GO:0060416~response to growth hormone stimulus	8	0.331675	9.9557e-05	8835, 6774, 2688, 6777, 6776, 2690, 5295, 3717	2278	9	13528	5.2787	0.363019	0.00106065	0.187327
GOTERM_BP_FAT	GO:0015988~energy coupled proton transport, against electrochemical gradient	8	0.331675	9.9557e-05	480, 8992, 529, 477, 495, 50617, 51606, 90423	2278	9	13528	5.2787	0.363019	0.00106065	0.187327
GOTERM_BP_FAT	GO:0022602~ovulation cycle process	24	0.995025	0.000101096	2064, 658, 5241, 5321, 2309, 5021, 4889, 3791, 2252, 2488, 3625, 3624, 1907, 2069, 2491, 2492, 3955, 3973, 7422, 183, 6777, 894, 6776, 898	2278	62	13528	2.29879	0.367444	0.00107451	0.19022
GOTERM_BP_FAT	GO:0045664~regulation of neuron differentiation	41	1.69983	0.000104807	388585, 4854, 3280, 9241, 4851, 57534, 8650, 7476, 81565, 60436, 1840, 4803, 387, 4099, 4804, 8997, 65078, 53637, 2902, 8851, 57142, 5747, 55755, 5364, 4747, 348, 7050, 4974, 28514, 10371, 8829, 6696, 9138, 7074, 396, 84894, 894, 7532, 4915, 55558, 4086	2278	133	13528	1.83068	0.37799	0.00111133	0.197196
GOTERM_BP_FAT	GO:0010975~regulation of neuron projection development	26	1.07794	0.000105295	8650, 7476, 81565, 387, 4803, 4099, 4804, 8997, 65078, 2902, 57142, 5747, 5364, 348, 4747, 4974, 10371, 8829, 6696, 9138, 7074, 396, 84894, 4915, 4086, 55558	2278	70	13528	2.20574	0.379365	0.00111389	0.198114
GOTERM_BP_FAT	GO:0006776~vitamin A metabolic process	13	0.538972	0.000108655	5950, 6121, 6017, 145226, 9227, 51109, 9249, 1592, 340665, 5948, 5947, 1543, 56603	2278	23	13528	3.35657	0.38874	0.00114674	0.204429
GOTERM_BP_FAT	GO:0051896~regulation of protein kinase B signaling cascade	11	0.456053	0.000110308	3481, 7040, 5728, 6453, 7249, 1813, 253260, 3643, 723961, 3630, 1814, 7046, 2475	2278	17	13528	3.84259	0.3933	0.00116147	0.207536
GOTERM_BP_FAT	GO:0001990~regulation of systemic arterial blood pressure by hormone	12	0.497512	0.000113596	1908, 183, 185, 186, 1814, 552, 1816, 553, 5125, 1906, 1585, 1907	2278	20	13528	3.56313	0.402271	0.0011933	0.213716
GOTERM_BP_FAT	GO:0002685~regulation of leukocyte migration	12	0.497512	0.000113596	134, 1908, 6387, 3673, 6868, 7422, 623, 2150, 102, 7057, 3383, 1907	2278	20	13528	3.56313	0.402271	0.0011933	0.213716
GOTERM_BP_FAT	GO:0032570~response to progesterone stimulus	12	0.497512	0.000113596	2066, 2064, 7040, 5970, 5021, 9021, 6347, 8651, 5020, 898, 7057, 3726	2278	20	13528	3.56313	0.402271	0.0011933	0.213716
GOTERM_BP_FAT	GO:0033619~membrane protein proteolysis	12	0.497512	0.000113596	7189, 6868, 83464, 5588, 5970, 55851, 5664, 23385, 4804, 4790, 102, 51107	2278	20	13528	3.56313	0.402271	0.0011933	0.213716
GOTERM_BP_FAT	GO:0045792~negative regulation of cell size	33	1.36816	0.000113772	11108, 7249, 1029, 1027, 1026, 2786, 2475, 3624, 1032, 7040, 1031, 623, 2247, 5515, 5518, 57142, 91, 5925, 51079, 207, 4722, 7157, 1594, 10371, 7248, 183, 8829, 6696, 84335, 186, 4088, 4089, 55558	2278	99	13528	1.97951	0.402748	0.00119238	0.214047
GOTERM_BP_FAT	GO:0043269~regulation of ion transport	33	1.36816	0.000113772	134, 135, 805, 2147, 64805, 2149, 801, 4734, 8074, 846, 154, 3356, 2771, 7040, 623, 23327, 796, 23566, 207, 495, 208, 2775, 491, 5028, 1909, 2280, 3973, 3060, 2847, 1812, 808, 1813, 1814, 4067, 5319	2278	99	13528	1.97951	0.402748	0.00119238	0.214047
GOTERM_BP_FAT	GO:0006916~anti-apoptosis	57	2.36318	0.000115207	4208, 55437, 4853, 3084, 60675, 8767, 332, 6347, 3479, 2099, 8841, 983, 3480, 4615, 8835, 6868, 8878, 8877, 5584, 301, 673, 3551, 6502, 207, 835, 7311, 348, 5590, 728590, 84335, 6777, 6776, 4790, 4792, 4609, 5618, 5970, 2932, 56848, 440577, 26574, 1032, 7189, 7422, 4803, 4804, 9021, 3654, 7046, 7015, 2308, 4869, 2796, 6233, 5290, 51738, 396, 3065, 7057	2278	206	13528	1.64319	0.406618	0.00120463	0.216744
GOTERM_BP_FAT	GO:0007602~phototransduction	16	0.66335	0.000116363	2652, 2779, 24, 728458, 10692, 5995, 408, 2780, 94233, 2792, 221391, 2793, 611, 5956, 7222, 6010, 23596	2278	33	13528	2.87929	0.409718	0.00121391	0.218917
GOTERM_BP_FAT	GO:0031667~response to nutrient levels	55	2.28027	0.00011965	5950, 2642, 4852, 6772, 6347, 5020, 2475, 7252, 1583, 885, 886, 5321, 4036, 11243, 1327, 632, 57521, 207, 1594, 2, 6198, 1591, 6696, 27327, 1277, 3643, 58496, 6752, 6750, 6751, 133, 5970, 1032, 2771, 7040, 1030, 2696, 10013, 1460, 9021, 7048, 1543, 2029, 595, 659, 3673, 5728, 5154, 2690, 650, 5727, 2691, 7157, 2693, 51738, 1208, 898	2278	197	13528	1.65797	0.418443	0.00124531	0.225094
GOTERM_BP_FAT	GO:0008406~gonad development	36	1.49254	0.000119735	5950, 3640, 2254, 2252, 3625, 3624, 2069, 7422, 10468, 10018, 595, 2067, 3714, 5241, 658, 5321, 92, 2309, 3791, 5568, 1081, 2488, 122042, 1907, 3972, 2491, 3973, 3955, 2492, 183, 54361, 6777, 894, 6776, 6382, 898	2278	112	13528	1.90882	0.418667	0.00124334	0.225254
GOTERM_BP_FAT	GO:0065004~protein-DNA complex assembly	31	1.28524	0.000123401	128312, 8467, 8360, 3013, 3012, 8362, 8361, 8364, 8363, 8366, 8365, 51773, 8368, 8367, 8970, 79003, 8349, 723790, 8294, 8290, 8359, 8338, 8339, 440577, 8340, 121504, 8346, 55355, 8345, 8348, 8347, 554313, 8342, 8341, 8344, 8343, 4869, 8370, 3018, 1062, 3014, 3015, 4171, 3017, 1058, 8337, 8335, 85236, 8334, 8331, 255626	2278	91	13528	2.02302	0.428243	0.00127845	0.232143
GOTERM_BP_FAT	GO:0051322~anaphase	7	0.290216	0.000135516	8379, 348235, 10393, 220134, 4926, 51433, 29945, 729012	2278	7	13528	5.93854	0.458779	0.00140068	0.254906
GOTERM_BP_FAT	GO:0000090~mitotic anaphase	7	0.290216	0.000135516	8379, 348235, 10393, 220134, 4926, 51433, 29945, 729012	2278	7	13528	5.93854	0.458779	0.00140068	0.254906
GOTERM_BP_FAT	GO:0006700~C21-steroid hormone biosynthetic process	7	0.290216	0.000135516	3972, 1583, 133, 2247, 2488, 1585, 1584	2278	7	13528	5.93854	0.458779	0.00140068	0.254906
GOTERM_BP_FAT	GO:0032368~regulation of lipid transport	15	0.621891	0.000138417	8399, 3690, 8660, 5020, 344, 336, 345, 207, 208, 348, 335, 3685, 4790, 4792, 7057	2278	30	13528	2.96927	0.465847	0.00142739	0.260357
GOTERM_BP_FAT	GO:0051321~meiotic cell cycle	33	1.36816	0.000140683	8243, 5719, 9985, 10388, 6847, 9700, 8900, 2069, 4926, 109, 9126, 5347, 6117, 5885, 10734, 10735, 3306, 7283, 1111, 93426, 27127, 26271, 3014, 151648, 50511, 9183, 994, 3955, 651610, 5810, 472, 4751, 151246, 56603	2278	100	13528	1.95972	0.471302	0.00144745	0.264613
GOTERM_BP_FAT	GO:0010721~negative regulation of cell development	20	0.829187	0.000147865	5747, 57142, 657, 9241, 7157, 10371, 4974, 7040, 387, 8829, 6696, 9138, 4099, 396, 84894, 1814, 4804, 4092, 55558, 65078	2278	48	13528	2.47439	0.48823	0.00151785	0.278105
GOTERM_BP_FAT	GO:0032582~negative regulation of gene-specific transcription	20	0.829187	0.000147865	4208, 9612, 388585, 9611, 3280, 79718, 9734, 9759, 23462, 1027, 650, 8841, 23493, 10014, 6907, 4088, 3065, 3066, 4790, 4092	2278	48	13528	2.47439	0.48823	0.00151785	0.278105
GOTERM_BP_FAT	GO:0007618~mating	14	0.580431	0.000161661	2902, 92, 5021, 5020, 351, 4543, 6869, 1583, 6863, 1812, 1816, 552, 84152, 551	2278	27	13528	3.07924	0.519238	0.0016556	0.304014
GOTERM_BP_FAT	GO:0006334~nucleosome assembly	29	1.20232	0.000165651	8338, 128312, 8339, 440577, 8467, 8340, 3013, 8360, 3012, 121504, 8362, 8361, 8346, 8364, 8345, 55355, 8363, 8348, 8366, 51773, 8347, 8365, 8368, 8342, 554313, 8341, 8970, 8367, 8344, 8343, 8349, 4869, 3018, 8370, 3014, 3015, 4171, 3017, 723790, 1058, 8337, 8294, 85236, 8335, 8334, 8290, 8359, 8331, 255626	2278	84	13528	2.05021	0.527851	0.00169261	0.311506
GOTERM_BP_FAT	GO:0032204~regulation of telomere maintenance	9	0.373134	0.000165782	2067, 7014, 7013, 25913, 2072, 26277, 65057, 4609, 54386	2278	12	13528	4.45391	0.528132	0.00169014	0.311753
GOTERM_BP_FAT	GO:0051054~positive regulation of DNA metabolic process	22	0.912106	0.0001676	3265, 7014, 5154, 5155, 5156, 672, 6464, 1763, 56034, 3479, 26277, 3014, 2069, 3480, 3481, 7040, 4254, 25913, 3643, 723961, 3630, 6778, 5582, 5319	2278	56	13528	2.333	0.532002	0.00170482	0.315166
GOTERM_BP_FAT	GO:0010553~negative regulation of specific transcription from RNA polymerase II promoter	18	0.746269	0.000167654	4208, 9612, 388585, 9611, 3280, 79718, 9734, 9759, 23462, 8841, 23493, 10014, 6907, 4088, 3065, 3066, 4790, 4092	2278	41	13528	2.60717	0.532116	0.00170154	0.315267
GOTERM_BP_FAT	GO:0007179~transforming growth factor beta receptor signaling pathway	23	0.953566	0.000173239	1281, 657, 5154, 5155, 8928, 6347, 2488, 1385, 9372, 25805, 409, 7040, 4088, 4090, 8239, 4089, 7048, 1278, 7046, 4093, 4086, 4087, 4091	2278	60	13528	2.27644	0.543807	0.00175425	0.325754
GOTERM_BP_FAT	GO:0045471~response to ethanol	24	0.995025	0.000176399	595, 2902, 5950, 5728, 2903, 2904, 6774, 5578, 2033, 6347, 2796, 348, 3351, 6198, 6869, 6777, 894, 7200, 2534, 1813, 3643, 1814, 898, 551	2278	64	13528	2.22695	0.550292	0.00178224	0.331686
GOTERM_BP_FAT	GO:0006461~protein complex assembly	117	4.85075	0.000183951	5437, 3084, 154, 4928, 3480, 374291, 284119, 1387, 5440, 6498, 8527, 6497, 51773, 79003, 5747, 7280, 375790, 673, 7283, 3710, 4193, 9735, 3915, 9054, 4609, 4690, 113457, 5618, 7514, 347733, 56034, 2071, 2266, 440577, 2068, 7040, 25909, 3320, 5564, 5563, 8440, 84790, 1645, 81027, 7529, 395, 324, 916, 917, 1062, 26271, 440567, 9372, 9183, 2966, 2965, 2280, 5571, 84617, 203068, 2968, 88, 2967, 999, …	2278	505	13528	1.37586	0.565419	0.00185434	0.345863
GOTERM_BP_FAT	GO:0070271~protein complex biogenesis	117	4.85075	0.000183951	5437, 3084, 154, 4928, 3480, 374291, 284119, 1387, 5440, 6498, 8527, 6497, 51773, 79003, 5747, 7280, 375790, 673, 7283, 3710, 4193, 9735, 3915, 9054, 4609, 4690, 113457, 5618, 7514, 347733, 56034, 2071, 2266, 440577, 2068, 7040, 25909, 3320, 5564, 5563, 8440, 84790, 1645, 81027, 7529, 395, 324, 916, 917, 1062, 26271, 440567, 9372, 9183, 2966, 2965, 2280, 5571, 84617, 203068, 2968, 88, 2967, 999, …	2278	505	13528	1.37586	0.565419	0.00185434	0.345863
GOTERM_BP_FAT	GO:0045778~positive regulation of ossification	13	0.538972	0.000184121	659, 9365, 657, 658, 93, 5321, 92, 5020, 650, 796, 154, 7040, 4088	2278	24	13528	3.21671	0.565755	0.00185194	0.346183
GOTERM_BP_FAT	GO:0050803~regulation of synapse structure and activity	13	0.538972	0.000184121	2902, 5747, 375790, 5578, 1286, 7476, 5021, 5020, 6233, 2693, 7311, 351, 51738, 728590	2278	24	13528	3.21671	0.565755	0.00185194	0.346183
GOTERM_BP_FAT	GO:0060348~bone development	38	1.57546	0.000186218	1290, 5599, 1956, 9241, 2254, 3339, 3479, 3381, 846, 2068, 7189, 3481, 8817, 7040, 4090, 723961, 3630, 1280, 2550, 5745, 5744, 11243, 51741, 2690, 91851, 25937, 650, 632, 2778, 6667, 50617, 1594, 1591, 442194, 6608, 6696, 4088, 4221, 1277, 525, 4086	2278	123	13528	1.83467	0.56986	0.00186886	0.350118
GOTERM_BP_FAT	GO:0065003~macromolecular complex assembly	148	6.13599	0.000186356	5437, 338, 128312, 3084, 336, 154, 335, 4928, 3480, 374291, 284119, 3013, 3012, 1387, 5440, 6498, 8527, 6497, 51773, 79003, 5747, 7280, 375790, 673, 7283, 3710, 4193, 345, 9735, 348, 723790, 3915, 8294, 9054, 8290, 4609, 4690, 113457, 7514, 5618, 347733, 56034, 2071, 2266, 440577, 2068, 7040, 25909, 3320, 5564, 121504, 5563, 8440, 84790, 1645, 554313, 81027, 7529, 395, 8370, 3018, 324, 916, 917, …	2278	665	13528	1.32166	0.570129	0.00186611	0.350377
GOTERM_BP_FAT	GO:0050768~negative regulation of neurogenesis	19	0.787728	0.000187787	5747, 57142, 657, 9241, 7157, 10371, 4974, 7040, 387, 8829, 6696, 9138, 4099, 396, 84894, 1814, 4804, 55558, 65078	2278	45	13528	2.50738	0.572907	0.00187628	0.353063
GOTERM_BP_FAT	GO:0060249~anatomical structure homeostasis	34	1.40962	0.000200178	5950, 2149, 1297, 2072, 2252, 154, 1499, 2271, 7422, 6117, 65057, 5741, 5159, 2066, 1280, 7014, 3673, 5880, 7015, 5745, 7013, 5744, 5321, 3091, 5981, 324, 3791, 1736, 26277, 54386, 5340, 25913, 5879, 142	2278	106	13528	1.90482	0.596224	0.00199557	0.376319
GOTERM_BP_FAT	GO:0042445~hormone metabolic process	34	1.40962	0.000200178	5950, 133, 5781, 1109, 145226, 5045, 5046, 9227, 51109, 1392, 50700, 9249, 335, 1583, 2247, 4803, 5947, 1543, 1545, 2834, 1081, 2488, 2692, 1586, 1585, 1584, 3972, 1592, 183, 54361, 340665, 6777, 5125, 56603	2278	106	13528	1.90482	0.596224	0.00199557	0.376319
GOTERM_BP_FAT	GO:0046627~negative regulation of insulin receptor signaling pathway	10	0.414594	0.000201564	5590, 2887, 5578, 5970, 3667, 5770, 9021, 8651, 2931, 5580	2278	15	13528	3.95903	0.598752	0.00200497	0.378919
GOTERM_BP_FAT	GO:0032369~negative regulation of lipid transport	10	0.414594	0.000201564	3685, 3690, 4790, 8660, 344, 336, 345, 207, 208, 7057	2278	15	13528	3.95903	0.598752	0.00200497	0.378919
GOTERM_BP_FAT	GO:0050807~regulation of synapse organization	12	0.497512	0.000202331	2902, 5747, 375790, 5578, 1286, 7476, 5021, 5020, 6233, 2693, 7311, 51738, 728590	2278	21	13528	3.39345	0.600145	0.00200819	0.38036
GOTERM_BP_FAT	GO:0048169~regulation of long-term neuronal synaptic plasticity	12	0.497512	0.000202331	2902, 3265, 2903, 2904, 1742, 653882, 3845, 3815, 4893, 183, 1812, 1813, 1816	2278	21	13528	3.39345	0.600145	0.00200819	0.38036
GOTERM_BP_FAT	GO:0000086~G2/M transition of mitotic cell cycle	12	0.497512	0.000202331	10393, 1030, 7013, 9113, 332, 1111, 1017, 51433, 891, 1785, 1026, 29945	2278	21	13528	3.39345	0.600145	0.00200819	0.38036
GOTERM_BP_FAT	GO:0030501~positive regulation of bone mineralization	11	0.456053	0.000210764	9365, 659, 657, 7040, 658, 93, 5321, 92, 4088, 650, 154	2278	18	13528	3.62911	0.615135	0.00208723	0.396183
GOTERM_BP_FAT	GO:0019098~reproductive behavior	11	0.456053	0.000210764	4543, 2902, 1583, 5021, 1812, 5020, 552, 1816, 84152, 351, 551	2278	18	13528	3.62911	0.615135	0.00208723	0.396183
GOTERM_BP_FAT	GO:0030323~respiratory tube development	33	1.36816	0.000212193	5950, 3280, 2033, 4851, 5664, 2254, 2252, 7472, 1392, 7474, 1499, 8817, 7422, 2246, 2247, 538, 7048, 1544, 7046, 659, 657, 5154, 10253, 93, 5156, 5744, 3791, 2264, 6667, 2255, 5499, 5125, 4087	2278	102	13528	1.92129	0.617619	0.00209679	0.398864
GOTERM_BP_FAT	GO:0001775~cell activation	73	3.02653	0.00021301	64805, 2147, 941, 2149, 942, 940, 7450, 8767, 643, 3683, 3684, 3383, 7253, 3676, 3481, 6868, 2244, 538, 7852, 3579, 3630, 723961, 5580, 3576, 2067, 1281, 3714, 7409, 1906, 1907, 7412, 3688, 4088, 6777, 6776, 4690, 135, 920, 5618, 1956, 5664, 10672, 2266, 1499, 10014, 7189, 7040, 6376, 6850, 8440, 7048, 102, 5154, 5156, 9734, 5196, 915, 324, 9759, 916, 917, 5532, 7157, 2243, 6387, 5291, 2280, 183,…	2278	287	13528	1.5105	0.619031	0.00210027	0.400396
GOTERM_BP_FAT	GO:0010959~regulation of metal ion transport	28	1.16086	0.000215115	134, 135, 805, 2147, 2149, 801, 4734, 846, 154, 3356, 2771, 7040, 623, 23327, 796, 23566, 207, 208, 2775, 491, 1909, 2280, 3973, 3060, 2847, 1812, 808, 1813, 4067, 5319	2278	81	13528	2.05283	0.622648	0.0021164	0.404346
GOTERM_BP_FAT	GO:0000902~cell morphogenesis	87	3.60697	0.000219532	55437, 4855, 5781, 284217, 5578, 3280, 9241, 4851, 2335, 10403, 54908, 9826, 3480, 6351, 387, 538, 885, 7852, 886, 5584, 1894, 4218, 5116, 89780, 5747, 2064, 8399, 2065, 55914, 5604, 3091, 25937, 6507, 1385, 4747, 7311, 3717, 56896, 10371, 6608, 8828, 8829, 3915, 54820, 728590, 7840, 23122, 1813, 3912, 5879, 55558, 6285, 135, 5108, 133, 7471, 1956, 8650, 5048, 10087, 667, 1499, 81565, 7040, 6789,…	2278	356	13528	1.45127	0.630125	0.00215513	0.412632
GOTERM_BP_FAT	GO:0050770~regulation of axonogenesis	22	0.912106	0.000223729	2902, 5747, 57142, 7476, 5364, 348, 4747, 81565, 10371, 4974, 387, 8829, 4803, 6696, 9138, 4099, 7074, 396, 84894, 4804, 55558, 65078	2278	57	13528	2.29207	0.637092	0.00219155	0.420505
GOTERM_BP_FAT	GO:0048609~reproductive process in a multicellular organism	113	4.68491	0.000224965	5950, 338, 29127, 5021, 6347, 5020, 3726, 6869, 9148, 26664, 3714, 5744, 4889, 1385, 207, 122042, 5367, 1907, 540, 3688, 8312, 472, 6777, 4221, 6776, 1816, 9985, 5618, 5048, 5617, 22994, 8655, 2069, 7040, 23198, 7422, 1069, 8239, 4090, 5139, 10018, 7046, 137964, 5241, 2309, 92, 1111, 5568, 3014, 26271, 6667, 2796, 9232, 491, 6387, 994, 5571, 651610, 183, 894, 891, 4957, 898, 117, 3640, 5781, 6067…	2278	487	13528	1.37794	0.639119	0.00219889	0.422824
GOTERM_BP_FAT	GO:0032504~multicellular organism reproduction	113	4.68491	0.000224965	5950, 338, 29127, 5021, 6347, 5020, 3726, 6869, 9148, 26664, 3714, 5744, 4889, 1385, 207, 122042, 5367, 1907, 540, 3688, 8312, 472, 6777, 4221, 6776, 1816, 9985, 5618, 5048, 5617, 22994, 8655, 2069, 7040, 23198, 7422, 1069, 8239, 4090, 5139, 10018, 7046, 137964, 5241, 2309, 92, 1111, 5568, 3014, 26271, 6667, 2796, 9232, 491, 6387, 994, 5571, 651610, 183, 894, 891, 4957, 898, 117, 3640, 5781, 6067…	2278	487	13528	1.37794	0.639119	0.00219889	0.422824
GOTERM_BP_FAT	GO:0007548~sex differentiation	44	1.82421	0.000230393	5950, 3640, 2683, 2254, 7476, 2252, 10388, 3625, 3624, 2069, 7422, 4090, 10468, 10018, 4093, 595, 2067, 3714, 657, 5241, 658, 5156, 5321, 92, 2309, 3791, 5568, 1081, 2488, 122042, 1586, 1907, 3972, 2491, 3973, 3955, 2492, 183, 54361, 6777, 894, 6776, 6382, 898	2278	151	13528	1.73044	0.647886	0.00224704	0.433004
GOTERM_BP_FAT	GO:0043523~regulation of neuron apoptosis	30	1.24378	0.000248105	2914, 135, 842, 3265, 2149, 3845, 5045, 5046, 2099, 1392, 727758, 4803, 387, 538, 6093, 2902, 8851, 3672, 2065, 6453, 2690, 7157, 4747, 3717, 5921, 1020, 4893, 183, 651610, 472, 84335, 4914	2278	90	13528	1.97951	0.675041	0.00241441	0.466219
GOTERM_BP_FAT	GO:0007595~lactation	14	0.580431	0.000255498	137964, 5744, 5618, 5021, 5617, 1385, 2692, 7472, 5367, 540, 491, 6777, 9148, 6776	2278	28	13528	2.96927	0.685746	0.00248094	0.48008
GOTERM_BP_FAT	GO:0003014~renal system process	14	0.580431	0.000255498	134, 135, 6869, 2837, 183, 185, 5733, 186, 3827, 1813, 1906, 5125, 1585, 551	2278	28	13528	2.96927	0.685746	0.00248094	0.48008
GOTERM_BP_FAT	GO:0031345~negative regulation of cell projection organization	14	0.580431	0.000255498	10371, 4974, 57142, 5747, 8829, 387, 6696, 9138, 4099, 84894, 396, 4804, 55558, 65078	2278	28	13528	2.96927	0.685746	0.00248094	0.48008
GOTERM_BP_FAT	GO:0010906~regulation of glucose metabolic process	16	0.66335	0.000260439	147, 3091, 9759, 3479, 8660, 2931, 207, 646227, 208, 2475, 3481, 5571, 5500, 3667, 3643, 3630, 723961, 51422, 10776	2278	35	13528	2.71476	0.692703	0.00252345	0.489342
GOTERM_BP_FAT	GO:0030324~lung development	32	1.3267	0.000274675	5950, 3280, 2033, 4851, 5664, 2254, 2252, 7472, 1392, 7474, 1499, 8817, 7422, 2246, 2247, 538, 7048, 1544, 7046, 659, 657, 5154, 10253, 93, 5156, 5744, 3791, 2264, 6667, 2255, 5499, 4087	2278	99	13528	1.91953	0.7119	0.00265555	0.516025
GOTERM_BP_FAT	GO:0010460~positive regulation of heart rate	8	0.331675	0.000283371	1908, 153, 147, 552, 6870, 553, 1906, 1907	2278	10	13528	4.75083	0.723031	0.00273368	0.53232
GOTERM_BP_FAT	GO:0014821~phasic smooth muscle contraction	8	0.331675	0.000283371	6752, 1908, 1910, 183, 1812, 1813, 1906, 1907	2278	10	13528	4.75083	0.723031	0.00273368	0.53232
GOTERM_BP_FAT	GO:0006103~2-oxoglutarate metabolic process	8	0.331675	0.000283371	3420, 1743, 3419, 6777, 1738, 6776, 2690, 3421	2278	10	13528	4.75083	0.723031	0.00273368	0.53232
GOTERM_BP_FAT	GO:0051785~positive regulation of nuclear division	13	0.538972	0.000300075	7013, 685, 940, 3479, 1950, 1062, 1906, 9700, 2069, 1908, 3481, 1814, 3630, 723961, 3643	2278	25	13528	3.08804	0.743222	0.00288847	0.563616
GOTERM_BP_FAT	GO:0045840~positive regulation of mitosis	13	0.538972	0.000300075	7013, 685, 940, 3479, 1950, 1062, 1906, 9700, 2069, 1908, 3481, 1814, 3630, 723961, 3643	2278	25	13528	3.08804	0.743222	0.00288847	0.563616
GOTERM_BP_FAT	GO:0051970~negative regulation of transmission of nerve impulse	13	0.538972	0.000300075	134, 3356, 3351, 2771, 3060, 1812, 4889, 1813, 552, 2773, 1816, 5367, 551	2278	25	13528	3.08804	0.743222	0.00288847	0.563616
GOTERM_BP_FAT	GO:0006323~DNA packaging	36	1.49254	0.000308584	128312, 64151, 8467, 8360, 3013, 3012, 8362, 8361, 8364, 8363, 8366, 51773, 8365, 8368, 8367, 8970, 8349, 9918, 723790, 8294, 8290, 8359, 10051, 8338, 8339, 23397, 113130, 440577, 8340, 121504, 8346, 8345, 55355, 8348, 8347, 8342, 554313, 8341, 8344, 8343, 4869, 10592, 8370, 3018, 3014, 3015, 4171, 50511, 3017, 1058, 8337, 8335, 85236, 8334, 8331, 255626	2278	117	13528	1.82724	0.752934	0.00296396	0.579553
GOTERM_BP_FAT	GO:0048608~reproductive structure development	38	1.57546	0.000316853	5950, 3640, 9241, 7476, 2254, 2252, 3625, 3624, 2069, 7422, 10468, 10018, 595, 2067, 3714, 5241, 658, 5321, 92, 2309, 3791, 5568, 1081, 2488, 122042, 1907, 3972, 2491, 3973, 3955, 2492, 183, 54361, 6777, 894, 6776, 6382, 898	2278	126	13528	1.79099	0.76202	0.00303684	0.59504
GOTERM_BP_FAT	GO:0001933~negative regulation of protein amino acid phosphorylation	15	0.621891	0.000321194	5578, 5664, 8651, 2280, 7040, 5590, 623, 5515, 5518, 4221, 3643, 624, 4092, 5580, 4091	2278	32	13528	2.78369	0.766657	0.0030719	0.60317
GOTERM_BP_FAT	GO:0031497~chromatin assembly	29	1.20232	0.000321963	8338, 128312, 8339, 440577, 8467, 8340, 3013, 8360, 3012, 121504, 8362, 8361, 8346, 8364, 8345, 55355, 8363, 8348, 8366, 51773, 8347, 8365, 8368, 8342, 554313, 8341, 8970, 8367, 8344, 8343, 8349, 4869, 3018, 8370, 3014, 3015, 4171, 3017, 723790, 1058, 8337, 8294, 85236, 8335, 8334, 8290, 8359, 8331, 255626	2278	87	13528	1.97951	0.767467	0.00307275	0.604608
GOTERM_BP_FAT	GO:0007162~negative regulation of cell adhesion	18	0.746269	0.000332266	506, 5728, 5140, 2065, 395, 5604, 3827, 1029, 3717, 5921, 7040, 396, 1277, 397, 398, 102, 5295, 7057	2278	43	13528	2.4859	0.778075	0.00316428	0.6239
GOTERM_BP_FAT	GO:0014066~regulation of phosphoinositide 3-kinase cascade	9	0.373134	0.000367303	2064, 3481, 2065, 2688, 183, 7249, 3479, 723961, 3630, 4734, 3717	2278	13	13528	4.1113	0.810656	0.00349009	0.689474
GOTERM_BP_FAT	GO:0044253~positive regulation of multicellular organismal metabolic process	9	0.373134	0.000367303	153, 3673, 7040, 2147, 2149, 4160, 3066, 155, 154	2278	13	13528	4.1113	0.810656	0.00349009	0.689474
GOTERM_BP_FAT	GO:0045137~development of primary sexual characteristics	38	1.57546	0.000375817	5950, 3640, 2254, 2252, 10388, 3625, 3624, 2069, 7422, 10468, 10018, 595, 2067, 3714, 5241, 658, 5156, 5321, 92, 2309, 3791, 5568, 1081, 2488, 122042, 1907, 3972, 2491, 3973, 3955, 2492, 183, 54361, 6777, 894, 6776, 6382, 898	2278	127	13528	1.77689	0.817822	0.00356339	0.705402
GOTERM_BP_FAT	GO:0060079~regulation of excitatory postsynaptic membrane potential	11	0.456053	0.000377963	134, 51738, 135, 1020, 2902, 2903, 2904, 3060, 2905, 5532, 5530	2278	19	13528	3.4381	0.819585	0.00357622	0.709417
GOTERM_BP_FAT	GO:0050926~regulation of positive chemotaxis	11	0.456053	0.000377963	1233, 6387, 3673, 7422, 2255, 5578, 4088, 3791, 1901, 2150, 3576	2278	19	13528	3.4381	0.819585	0.00357622	0.709417
GOTERM_BP_FAT	GO:0050927~positive regulation of positive chemotaxis	11	0.456053	0.000377963	1233, 6387, 3673, 7422, 2255, 5578, 4088, 3791, 1901, 2150, 3576	2278	19	13528	3.4381	0.819585	0.00357622	0.709417
GOTERM_BP_FAT	GO:0070169~positive regulation of biomineral formation	11	0.456053	0.000377963	9365, 659, 657, 7040, 658, 93, 5321, 92, 4088, 650, 154	2278	19	13528	3.4381	0.819585	0.00357622	0.709417
GOTERM_BP_FAT	GO:0051966~regulation of synaptic transmission, glutamatergic	11	0.456053	0.000377963	134, 3356, 135, 3351, 1956, 5021, 1812, 5566, 1813, 4915, 2911	2278	19	13528	3.4381	0.819585	0.00357622	0.709417
GOTERM_BP_FAT	GO:0043471~regulation of cellular carbohydrate catabolic process	10	0.414594	0.000391927	3481, 5571, 147, 5500, 3091, 9759, 3643, 3479, 723961, 3630, 51422, 2931	2278	16	13528	3.71159	0.830649	0.0037004	0.735535
GOTERM_BP_FAT	GO:0043470~regulation of carbohydrate catabolic process	10	0.414594	0.000391927	3481, 5571, 147, 5500, 3091, 9759, 3643, 3479, 723961, 3630, 51422, 2931	2278	16	13528	3.71159	0.830649	0.0037004	0.735535
GOTERM_BP_FAT	GO:0007565~female pregnancy	34	1.40962	0.000427093	116, 133, 5618, 682, 6019, 5021, 5617, 1394, 5020, 1392, 3726, 7040, 6866, 7048, 7046, 2834, 1442, 5744, 5321, 2321, 796, 2488, 2778, 6667, 2796, 2693, 51738, 1594, 6696, 4221, 6777, 6776, 3912, 5125	2278	110	13528	1.83555	0.855597	0.00402344	0.80128
GOTERM_BP_FAT	GO:0050727~regulation of inflammatory response	26	1.07794	0.000456021	134, 135, 136, 5578, 10203, 154, 6352, 3481, 6376, 723961, 3630, 3673, 5320, 5321, 4889, 3717, 348, 2693, 1909, 51738, 1215, 2, 718, 183, 6863, 185, 6777, 6776, 653879	2278	76	13528	2.03161	0.87334	0.00428652	0.855333
GOTERM_BP_FAT	GO:0034728~nucleosome organization	30	1.24378	0.000460571	8338, 128312, 8339, 440577, 8467, 8340, 3013, 8360, 3012, 121504, 8362, 8361, 8346, 8364, 8345, 55355, 8363, 8348, 8366, 51773, 8347, 8365, 8368, 8342, 554313, 8341, 8970, 8367, 8344, 8343, 8349, 4869, 3018, 8370, 3014, 3015, 4171, 3017, 50511, 723790, 1058, 8337, 8294, 85236, 8335, 8334, 8290, 8359, 8331, 255626	2278	93	13528	1.91566	0.875925	0.00432024	0.863831
GOTERM_BP_FAT	GO:0040001~establishment of mitotic spindle localization	7	0.290216	0.000464298	9183, 1058, 54820, 5048, 10403, 54908, 9700	2278	8	13528	5.19622	0.878003	0.00434613	0.870792
GOTERM_BP_FAT	GO:0007217~tachykinin receptor signaling pathway	7	0.290216	0.000464298	6869, 6863, 6866, 6865, 2869, 6870, 156	2278	8	13528	5.19622	0.878003	0.00434613	0.870792
GOTERM_BP_FAT	GO:0050690~regulation of defense response to virus by virus	7	0.290216	0.000464298	161, 163, 160, 940, 1175, 51606, 1173	2278	8	13528	5.19622	0.878003	0.00434613	0.870792
GOTERM_BP_FAT	GO:0042359~vitamin D metabolic process	7	0.290216	0.000464298	1594, 1591, 1583, 120227, 1543, 8074, 1576	2278	8	13528	5.19622	0.878003	0.00434613	0.870792
GOTERM_BP_FAT	GO:0007183~SMAD protein complex assembly	7	0.290216	0.000464298	2280, 7040, 4088, 4089, 9372, 4086, 4087	2278	8	13528	5.19622	0.878003	0.00434613	0.870792
GOTERM_BP_FAT	GO:0045737~positive regulation of cyclin-dependent protein kinase activity	7	0.290216	0.000464298	595, 6868, 1956, 5500, 894, 207, 896	2278	8	13528	5.19622	0.878003	0.00434613	0.870792
GOTERM_BP_FAT	GO:0001501~skeletal system development	78	3.23383	0.000469161	5950, 1290, 1297, 5578, 9241, 2254, 3339, 3479, 2251, 846, 3381, 3624, 3481, 2249, 538, 65057, 3630, 723961, 8879, 5741, 2200, 5159, 1280, 1281, 3714, 7483, 5745, 5744, 4318, 11243, 25937, 632, 50617, 2261, 1906, 2260, 6197, 1594, 442194, 1591, 6608, 8788, 6696, 4088, 4221, 1277, 1278, 4609, 4086, 5125, 5599, 1432, 1956, 7476, 2767, 7474, 1499, 2068, 7189, 7040, 8817, 4090, 7048, 7046, 657, 2550,…	2278	319	13528	1.45206	0.880662	0.00438251	0.879875
GOTERM_BP_FAT	GO:0045793~positive regulation of cell size	19	0.787728	0.000481411	154796, 2395, 2033, 3084, 1019, 5607, 207, 1906, 3481, 2837, 6868, 4803, 1839, 8877, 58191, 723961, 3630, 102, 552, 7046, 551	2278	48	13528	2.35067	0.887107	0.00448747	0.902751
GOTERM_BP_FAT	GO:0008585~female gonad development	23	0.953566	0.000496571	658, 5241, 5321, 2309, 3791, 2252, 2488, 3625, 3624, 1907, 2069, 2491, 2492, 3955, 3973, 7422, 183, 54361, 6777, 894, 6776, 10468, 898	2278	64	13528	2.13416	0.894603	0.00461898	0.931053
GOTERM_BP_FAT	GO:0048871~multicellular organismal homeostasis	28	1.16086	0.000515777	134, 5950, 6774, 2149, 1297, 5733, 2252, 155, 1499, 154, 3356, 153, 2271, 7422, 6117, 5741, 5159, 2066, 1280, 3673, 5880, 5745, 5744, 5321, 3791, 1812, 1813, 5879	2278	85	13528	1.95623	0.90339	0.00478742	0.966897
GOTERM_BP_FAT	GO:0051327~M phase of meiotic cell cycle	31	1.28524	0.000525428	8243, 5719, 9985, 10388, 6847, 9700, 8900, 2069, 109, 9126, 5347, 6117, 5885, 10734, 10735, 3306, 1111, 93426, 27127, 26271, 3014, 151648, 50511, 9183, 994, 3955, 651610, 5810, 472, 4751, 151246, 56603	2278	98	13528	1.87852	0.907525	0.00486684	0.984906
GOTERM_BP_FAT	GO:0007126~meiosis	31	1.28524	0.000525428	8243, 5719, 9985, 10388, 6847, 9700, 8900, 2069, 109, 9126, 5347, 6117, 5885, 10734, 10735, 3306, 1111, 93426, 27127, 26271, 3014, 151648, 50511, 9183, 994, 3955, 651610, 5810, 472, 4751, 151246, 56603	2278	98	13528	1.87852	0.907525	0.00486684	0.984906
GOTERM_BP_FAT	GO:0009895~negative regulation of catabolic process	16	0.66335	0.000537054	134, 2903, 5140, 147, 2905, 5970, 9759, 5045, 2931, 336, 345, 207, 8843, 2475, 3481, 3630, 723961, 5582, 338442	2278	37	13528	2.56802	0.912271	0.00496414	1.00659
GOTERM_BP_FAT	GO:0019722~calcium-mediated signaling	16	0.66335	0.000537054	84634, 222545, 1956, 10316, 2911, 846, 1906, 1907, 185, 7840, 1812, 8877, 11251, 552, 56923, 3576	2278	37	13528	2.56802	0.912271	0.00496414	1.00659
GOTERM_BP_FAT	GO:0030500~regulation of bone mineralization	14	0.580431	0.000586224	659, 9365, 657, 658, 93, 5321, 92, 11243, 650, 632, 8074, 154, 1594, 7040, 4088	2278	30	13528	2.77132	0.929798	0.0054065	1.09827
GOTERM_BP_FAT	GO:0046660~female sex differentiation	24	0.995025	0.000614845	5950, 5241, 658, 5321, 2309, 3791, 2252, 2488, 3625, 3624, 1907, 2069, 2491, 2492, 3955, 3973, 7422, 183, 54361, 6777, 894, 6776, 10468, 898	2278	69	13528	2.06558	0.938339	0.00565828	1.1516
GOTERM_BP_FAT	GO:0046545~development of primary female sexual characteristics	24	0.995025	0.000614845	5950, 5241, 658, 5321, 2309, 3791, 2252, 2488, 3625, 3624, 1907, 2069, 2491, 2492, 3955, 3973, 7422, 183, 54361, 6777, 894, 6776, 10468, 898	2278	69	13528	2.06558	0.938339	0.00565828	1.1516
GOTERM_BP_FAT	GO:0046519~sphingoid metabolic process	18	0.746269	0.000621124	6610, 166929, 81537, 125981, 56848, 253782, 10087, 91012, 340485, 5515, 5518, 3696, 8877, 8879, 79603, 259230, 29956, 55331	2278	45	13528	2.37542	0.940069	0.00570433	1.16329
GOTERM_BP_FAT	GO:0046879~hormone secretion	18	0.746269	0.000621124	93, 4036, 818, 338557, 2740, 1081, 2692, 2691, 1906, 51083, 2693, 51738, 1908, 2864, 4160, 11069, 4067, 4087	2278	45	13528	2.37542	0.940069	0.00570433	1.16329
GOTERM_BP_FAT	GO:0046890~regulation of lipid biosynthetic process	18	0.746269	0.000621124	338, 5154, 5155, 5321, 672, 476, 344, 345, 207, 348, 3481, 3973, 183, 5562, 723961, 3630, 4790, 552, 9965, 551	2278	45	13528	2.37542	0.940069	0.00570433	1.16329
GOTERM_BP_FAT	GO:0048754~branching morphogenesis of a tube	23	0.953566	0.000632945	4855, 10253, 4851, 2683, 2321, 3791, 10672, 3479, 650, 1950, 2719, 1906, 1499, 1909, 6387, 7422, 183, 2255, 8829, 5499, 7852, 4089, 7048	2278	65	13528	2.10133	0.943196	0.00580085	1.18531
GOTERM_BP_FAT	GO:0019637~organophosphate metabolic process	53	2.19735	0.000633083	5330, 4023, 23236, 5331, 166929, 2819, 5048, 23171, 2252, 56848, 57678, 336, 8613, 335, 222236, 6888, 79888, 8811, 253558, 653924, 5289, 8526, 84803, 254531, 259230, 137964, 283748, 30814, 5728, 8399, 5320, 5321, 6610, 5322, 81537, 64600, 5290, 5291, 5293, 5335, 10554, 26279, 10555, 81579, 56894, 5337, 56895, 1812, 1813, 55326, 150763, 5294, 5295, 5319	2278	200	13528	1.57371	0.943231	0.0057904	1.18557
GOTERM_BP_FAT	GO:0051385~response to mineralocorticoid stimulus	11	0.456053	0.000642331	595, 3351, 6714, 5578, 7200, 3845, 552, 1026, 898, 4747, 3726	2278	20	13528	3.2662	0.945562	0.00586294	1.20279
GOTERM_BP_FAT	GO:0042593~glucose homeostasis	19	0.787728	0.000642627	5950, 5140, 147, 5781, 6774, 2309, 3091, 5727, 5367, 5054, 1584, 3481, 2864, 7840, 3667, 3643, 723961, 3630, 572, 6755, 6194	2278	49	13528	2.3027	0.945635	0.00585384	1.20334
GOTERM_BP_FAT	GO:0007163~establishment or maintenance of cell polarity	19	0.787728	0.000642627	7471, 55914, 284217, 324, 10403, 5048, 917, 54908, 9826, 9183, 3480, 6351, 1058, 54820, 23122, 5584, 56288, 23332, 998	2278	49	13528	2.3027	0.945635	0.00585384	1.20334
GOTERM_BP_FAT	GO:0009896~positive regulation of catabolic process	19	0.787728	0.000642627	147, 3091, 10273, 324, 5045, 4193, 3479, 344, 8660, 4734, 336, 207, 208, 348, 3481, 3667, 3643, 723961, 3630, 83737, 4092	2278	49	13528	2.3027	0.945635	0.00585384	1.20334
GOTERM_BP_FAT	GO:0033500~carbohydrate homeostasis	19	0.787728	0.000642627	5950, 5140, 147, 5781, 6774, 2309, 3091, 5727, 5367, 5054, 1584, 3481, 2864, 7840, 3667, 3643, 723961, 3630, 572, 6755, 6194	2278	49	13528	2.3027	0.945635	0.00585384	1.20334
GOTERM_BP_FAT	GO:0031329~regulation of cellular catabolic process	22	0.912106	0.000646258	147, 3091, 10273, 9759, 5045, 4193, 3479, 2931, 8660, 344, 345, 207, 208, 2475, 348, 3481, 5571, 5500, 3667, 3643, 723961, 3630, 51422, 4092	2278	61	13528	2.14177	0.946522	0.00587502	1.2101
GOTERM_BP_FAT	GO:0040013~negative regulation of locomotion	22	0.912106	0.000646258	134, 135, 5728, 84634, 5155, 54567, 10395, 10076, 348, 5340, 10014, 51738, 3358, 7040, 2247, 186, 1812, 1813, 1816, 4092, 7057, 64411	2278	61	13528	2.14177	0.946522	0.00587502	1.2101
GOTERM_BP_FAT	GO:0045736~negative regulation of cyclin-dependent protein kinase activity	8	0.331675	0.000665738	9113, 26524, 4221, 1029, 324, 1027, 1026, 836	2278	11	13528	4.31894	0.951042	0.00603952	1.24636
GOTERM_BP_FAT	GO:0050891~multicellular organismal water homeostasis	8	0.331675	0.000665738	135, 5733, 3827, 1813, 5020, 1906, 1585, 551	2278	11	13528	4.31894	0.951042	0.00603952	1.24636
GOTERM_BP_FAT	GO:0043551~regulation of phosphoinositide 3-kinase activity	6	0.248756	0.000694553	7040, 7410, 3667, 10451, 5879, 998	2278	6	13528	5.93854	0.957037	0.0062876	1.29997
GOTERM_BP_FAT	GO:0043552~positive regulation of phosphoinositide 3-kinase activity	6	0.248756	0.000694553	7040, 7410, 3667, 10451, 5879, 998	2278	6	13528	5.93854	0.957037	0.0062876	1.29997
GOTERM_BP_FAT	GO:0007191~activation of adenylate cyclase activity by dopamine receptor signaling pathway	6	0.248756	0.000694553	4988, 1812, 1814, 2778, 1816, 2774	2278	6	13528	5.93854	0.957037	0.0062876	1.29997
GOTERM_BP_FAT	GO:0000132~establishment of mitotic spindle orientation	6	0.248756	0.000694553	9183, 1058, 54820, 5048, 10403, 54908	2278	6	13528	5.93854	0.957037	0.0062876	1.29997
GOTERM_BP_FAT	GO:0051294~establishment of spindle orientation	6	0.248756	0.000694553	9183, 1058, 54820, 5048, 10403, 54908	2278	6	13528	5.93854	0.957037	0.0062876	1.29997
GOTERM_BP_FAT	GO:0042363~fat-soluble vitamin catabolic process	6	0.248756	0.000694553	1594, 1591, 1592, 340665, 8074, 56603	2278	6	13528	5.93854	0.957037	0.0062876	1.29997
GOTERM_BP_FAT	GO:0010824~regulation of centrosome duplication	6	0.248756	0.000694553	79959, 7514, 672, 4869, 10733, 440577, 9475	2278	6	13528	5.93854	0.957037	0.0062876	1.29997
GOTERM_BP_FAT	GO:0022616~DNA strand elongation	6	0.248756	0.000694553	7015, 2237, 5984, 1763, 5422, 5983	2278	6	13528	5.93854	0.957037	0.0062876	1.29997
GOTERM_BP_FAT	GO:0051384~response to glucocorticoid stimulus	26	1.07794	0.000705386	595, 133, 5321, 2033, 5578, 5604, 799, 3845, 6347, 2690, 5020, 2692, 1026, 336, 10076, 3726, 4747, 6352, 2, 6198, 4803, 7200, 6382, 3643, 552, 898	2278	78	13528	1.97951	0.959096	0.00637266	1.32012
GOTERM_BP_FAT	GO:0007584~response to nutrient	40	1.65837	0.000706843	6752, 5950, 6750, 6751, 2642, 6772, 5970, 6347, 5020, 2475, 1032, 2771, 7252, 1030, 7040, 1583, 2696, 1460, 7048, 886, 1543, 2029, 595, 5728, 3673, 5154, 5321, 4036, 11243, 1327, 650, 632, 5727, 1594, 2, 6198, 1591, 6696, 1277, 3643, 58496, 898	2278	140	13528	1.69673	0.959365	0.00637308	1.32283
GOTERM_BP_FAT	GO:0042310~vasoconstriction	10	0.414594	0.00070875	1909, 1908, 1910, 146, 147, 183, 1816, 1906, 551, 1907	2278	17	13528	3.49326	0.959715	0.00637753	1.32637
GOTERM_BP_FAT	GO:0016575~histone deacetylation	10	0.414594	0.00070875	10014, 79885, 10013, 9734, 3065, 9759, 3066, 83933, 8841, 55869	2278	17	13528	3.49326	0.959715	0.00637753	1.32637
GOTERM_BP_FAT	GO:0007586~digestion	29	1.20232	0.000725605	6752, 5950, 6750, 6751, 4852, 10874, 5021, 5539, 5020, 6343, 6344, 3949, 51302, 5540, 8811, 1131, 886, 57016, 6564, 1645, 887, 5697, 2862, 51738, 7433, 2587, 441282, 1208, 5406, 5319	2278	91	13528	1.8925	0.962678	0.00651582	1.35771
GOTERM_BP_FAT	GO:0009581~detection of external stimulus	25	1.03648	0.00073985	5950, 2916, 10692, 221391, 2792, 94233, 2793, 4804, 3673, 2904, 2652, 2779, 24, 796, 728458, 491, 5995, 408, 2780, 611, 2534, 5956, 7222, 4609, 6010, 23596	2278	74	13528	2.00626	0.965012	0.00663023	1.38419
GOTERM_BP_FAT	GO:0001763~morphogenesis of a branching structure	25	1.03648	0.00073985	4855, 10253, 4851, 2683, 2321, 3791, 10672, 3479, 650, 1950, 2719, 1906, 1499, 1909, 6387, 7040, 7422, 183, 2255, 8829, 5499, 7852, 1813, 4089, 7048	2278	74	13528	2.00626	0.965012	0.00663023	1.38419
GOTERM_BP_FAT	GO:0010675~regulation of cellular carbohydrate metabolic process	16	0.66335	0.000750627	147, 3091, 9759, 3479, 8660, 2931, 207, 646227, 208, 2475, 3481, 5571, 5500, 3667, 3643, 3630, 723961, 51422, 10776	2278	38	13528	2.50044	0.966681	0.00671324	1.40422
GOTERM_BP_FAT	GO:0035239~tube morphogenesis	37	1.534	0.000785654	4855, 4851, 2683, 57534, 7249, 10672, 3479, 1950, 10395, 1499, 7189, 7422, 8323, 7852, 7048, 10018, 89780, 1856, 10253, 2321, 3791, 7976, 650, 5727, 2719, 1906, 1909, 7050, 6387, 2255, 7248, 183, 8829, 54361, 5499, 2909, 4089	2278	127	13528	1.73013	0.971573	0.00701169	1.46929
GOTERM_BP_FAT	GO:0043270~positive regulation of ion transport	17	0.704809	0.000800955	134, 64805, 2147, 2149, 23566, 207, 208, 154, 491, 5028, 1909, 3973, 3060, 623, 2847, 1812, 5319	2278	42	13528	2.4037	0.973478	0.00713376	1.4977
GOTERM_BP_FAT	GO:0051348~negative regulation of transferase activity	30	1.24378	0.000819351	135, 5578, 7249, 1029, 2931, 1027, 1026, 3481, 5515, 5518, 723961, 3630, 51422, 1848, 57761, 10253, 7013, 10252, 26524, 324, 5170, 5925, 207, 836, 348, 9113, 84335, 25913, 4221, 1812, 7532, 1816	2278	96	13528	1.85579	0.9756	0.00728276	1.53185
GOTERM_BP_FAT	GO:0008360~regulation of cell shape	20	0.829187	0.000850296	116985, 2768, 2335, 3791, 10672, 10395, 5921, 89846, 23433, 7422, 3689, 57381, 3679, 2245, 221472, 2534, 2909, 121512, 57194, 64411	2278	54	13528	2.19946	0.978794	0.0075421	1.58926
GOTERM_BP_FAT	GO:0021700~developmental maturation	31	1.28524	0.000913412	388585, 7471, 9985, 1742, 3280, 4851, 5664, 1499, 2068, 2069, 7422, 5139, 2066, 137964, 2902, 7855, 5241, 5745, 375790, 2309, 1738, 2776, 3791, 26271, 2692, 122042, 207, 351, 994, 8312, 891	2278	101	13528	1.82272	0.984072	0.00808411	1.70627
GOTERM_BP_FAT	GO:0051705~behavioral interaction between organisms	15	0.621891	0.000958697	2902, 2904, 2925, 5021, 5020, 351, 4543, 6869, 1583, 1812, 1814, 1816, 552, 84152, 551	2278	35	13528	2.54509	0.987028	0.00846685	1.79014
GOTERM_BP_FAT	GO:0031023~microtubule organizing center organization	15	0.621891	0.000958697	5108, 4869, 672, 5048, 11190, 9738, 440577, 55722, 1499, 55835, 9662, 1069, 54820, 4751, 9793, 55142	2278	35	13528	2.54509	0.987028	0.00846685	1.79014
GOTERM_BP_FAT	GO:0009891~positive regulation of biosynthetic process	149	6.17745	0.00101218	4208, 4303, 2147, 6774, 941, 2149, 942, 3280, 2002, 940, 8928, 54106, 3479, 336, 3726, 154, 3480, 3481, 1387, 8878, 51773, 5741, 375790, 5744, 672, 79718, 3091, 1901, 344, 1385, 207, 122042, 208, 3718, 1906, 3717, 348, 728590, 4221, 6777, 1812, 6776, 1814, 6778, 4790, 1816, 4792, 4609, 920, 1432, 5970, 56034, 2071, 440577, 10014, 2068, 7189, 2069, 7040, 7422, 3320, 10013, 5562, 4090, 7046, 4093, …	2278	695	13528	1.27316	0.989822	0.00891994	1.88911
GOTERM_BP_FAT	GO:0006109~regulation of carbohydrate metabolic process	16	0.66335	0.00103208	147, 3091, 9759, 3479, 8660, 2931, 207, 646227, 208, 2475, 3481, 5571, 5500, 3667, 3643, 3630, 723961, 51422, 10776	2278	39	13528	2.43633	0.9907	0.00907697	1.92592
GOTERM_BP_FAT	GO:0032880~regulation of protein localization	39	1.61692	0.00104189	135, 5950, 9908, 5781, 2932, 1950, 336, 6847, 335, 7189, 3481, 7040, 387, 7424, 723961, 3630, 5584, 7046, 657, 7529, 5588, 5566, 5170, 324, 1062, 207, 3717, 1020, 6608, 23433, 5590, 4088, 396, 4089, 1813, 398, 1814, 4792, 5295, 999, 5319	2278	138	13528	1.67828	0.991104	0.00914509	1.94404
GOTERM_BP_FAT	GO:0001569~patterning of blood vessels	11	0.456053	0.00104233	1909, 6387, 4855, 7422, 8829, 2321, 10672, 7852, 7048, 1906, 1499	2278	21	13528	3.11067	0.991122	0.0091313	1.94486
GOTERM_BP_FAT	GO:0006974~response to DNA damage stimulus	87	3.60697	0.00105814	63967, 842, 4303, 5781, 1763, 7298, 983, 5984, 5985, 5887, 8525, 6117, 65057, 5885, 6119, 10714, 6118, 2067, 653238, 5884, 672, 5883, 23645, 5981, 5983, 5982, 7508, 836, 7507, 114799, 5500, 545, 472, 4221, 5594, 8243, 651921, 4331, 11200, 1453, 1432, 6300, 1454, 84126, 2072, 2071, 2073, 1026, 3364, 26574, 57804, 1032, 2068, 9126, 5422, 157570, 9978, 1643, 5111, 1642, 22897, 595, 5427, 7014, 64815…	2278	373	13528	1.38513	0.991737	0.00925136	1.97409
GOTERM_BP_FAT	GO:0031645~negative regulation of neurological system process	13	0.538972	0.00107012	134, 3356, 3351, 2771, 3060, 1812, 4889, 1813, 552, 2773, 1816, 5367, 551	2278	28	13528	2.75718	0.992174	0.00933766	1.99623
GOTERM_BP_FAT	GO:0006644~phospholipid metabolic process	50	2.07297	0.00108113	5330, 4023, 23236, 5331, 166929, 5048, 2252, 56848, 336, 57678, 8613, 335, 222236, 79888, 8811, 253558, 653924, 5289, 8526, 84803, 254531, 259230, 137964, 283748, 30814, 5728, 8399, 5320, 5321, 6610, 5322, 81537, 64600, 5290, 5291, 5293, 5335, 10554, 26279, 10555, 81579, 56894, 5337, 56895, 1812, 1813, 55326, 150763, 5294, 5295, 5319	2278	190	13528	1.56277	0.992555	0.00941516	2.01656
GOTERM_BP_FAT	GO:0032094~response to food	7	0.290216	0.00119378	2690, 9021, 1543, 1208, 207, 2691, 2693	2278	9	13528	4.61887	0.995533	0.0103718	2.22445
GOTERM_BP_FAT	GO:0007080~mitotic metaphase plate congression	7	0.290216	0.00119378	9183, 8697, 113130, 81930, 1062, 81929, 54908	2278	9	13528	4.61887	0.995533	0.0103718	2.22445
GOTERM_BP_FAT	GO:0007020~microtubule nucleation	7	0.290216	0.00119378	114791, 10844, 55835, 27229, 54820, 85378, 10426	2278	9	13528	4.61887	0.995533	0.0103718	2.22445
GOTERM_BP_FAT	GO:0048009~insulin-like growth factor receptor signaling pathway	7	0.290216	0.00119378	3480, 2887, 7249, 3667, 2690, 207, 5295	2278	9	13528	4.61887	0.995533	0.0103718	2.22445
GOTERM_BP_FAT	GO:0060491~regulation of cell projection assembly	10	0.414594	0.00120674	23433, 5898, 5588, 653882, 116985, 3815, 324, 7046, 5879, 998, 2475	2278	18	13528	3.29919	0.995788	0.0104637	2.24833
GOTERM_BP_FAT	GO:0007212~dopamine receptor signaling pathway	10	0.414594	0.00120674	4988, 1812, 2776, 2767, 1813, 1814, 2778, 1816, 2775, 2774	2278	18	13528	3.29919	0.995788	0.0104637	2.24833
GOTERM_BP_FAT	GO:0070167~regulation of biomineral formation	14	0.580431	0.0012209	659, 9365, 657, 658, 93, 5321, 92, 11243, 650, 632, 8074, 154, 1594, 7040, 4088	2278	32	13528	2.59811	0.99605	0.0105658	2.27443
GOTERM_BP_FAT	GO:0050680~negative regulation of epithelial cell proliferation	12	0.497512	0.00132697	2069, 1021, 9500, 1030, 7040, 5320, 7249, 324, 26277, 1027, 3852, 5727	2278	25	13528	2.8505	0.997559	0.0114572	2.46971
GOTERM_BP_FAT	GO:0007215~glutamate signaling pathway	12	0.497512	0.00132697	2914, 2915, 2902, 8851, 2903, 6751, 2904, 2905, 2916, 2776, 478, 351	2278	25	13528	2.8505	0.997559	0.0114572	2.46971
GOTERM_BP_FAT	GO:0045669~positive regulation of osteoblast differentiation	12	0.497512	0.00132697	659, 657, 658, 93, 92, 4221, 4090, 7477, 2778, 650, 4086, 1499	2278	25	13528	2.8505	0.997559	0.0114572	2.46971
GOTERM_BP_FAT	GO:0019218~regulation of steroid metabolic process	15	0.621891	0.00132852	338, 10273, 476, 336, 51083, 335, 348, 3973, 183, 185, 5562, 6777, 6776, 4790, 9965	2278	36	13528	2.47439	0.997576	0.0114487	2.47256
GOTERM_BP_FAT	GO:0031331~positive regulation of cellular catabolic process	15	0.621891	0.00132852	147, 3091, 10273, 5045, 4193, 3479, 8660, 344, 207, 208, 348, 3481, 3667, 3643, 723961, 3630, 4092	2278	36	13528	2.47439	0.997576	0.0114487	2.47256
GOTERM_BP_FAT	GO:0048168~regulation of neuronal synaptic plasticity	15	0.621891	0.00132852	2902, 3265, 2903, 2904, 815, 1742, 653882, 3815, 3845, 5367, 348, 4893, 183, 1812, 1813, 1816	2278	36	13528	2.47439	0.997576	0.0114487	2.47256
GOTERM_BP_FAT	GO:0051055~negative regulation of lipid biosynthetic process	9	0.373134	0.00133527	5154, 5155, 672, 5562, 476, 4790, 345, 9965, 348	2278	15	13528	3.56313	0.997649	0.0114847	2.48498
GOTERM_BP_FAT	GO:0050000~chromosome localization	9	0.373134	0.00133527	9183, 8697, 54820, 113130, 81930, 332, 1062, 81929, 54908	2278	15	13528	3.56313	0.997649	0.0114847	2.48498
GOTERM_BP_FAT	GO:0032881~regulation of polysaccharide metabolic process	9	0.373134	0.00133527	3481, 147, 5500, 3667, 3643, 723961, 3630, 8660, 207, 208, 2475	2278	15	13528	3.56313	0.997649	0.0114847	2.48498
GOTERM_BP_FAT	GO:0051303~establishment of chromosome localization	9	0.373134	0.00133527	9183, 8697, 54820, 113130, 81930, 332, 1062, 81929, 54908	2278	15	13528	3.56313	0.997649	0.0114847	2.48498
GOTERM_BP_FAT	GO:0006952~defense response	133	5.5141	0.00134241	2147, 6774, 2149, 5733, 6349, 2335, 54106, 6347, 6348, 3683, 336, 1392, 51083, 59340, 4615, 6352, 6351, 3481, 6869, 1524, 6356, 6354, 414062, 885, 30814, 5179, 930, 3091, 5032, 8111, 1903, 207, 3694, 6361, 2, 1594, 3688, 6364, 6363, 6366, 6696, 3689, 6367, 6777, 1812, 4790, 58496, 6360, 9365, 5970, 2788, 10014, 728, 7040, 6376, 727, 623, 4803, 6373, 6372, 10803, 729230, 6370, 1460, 1269, 624, 108…	2278	615	13528	1.28427	0.997724	0.0115239	2.4981
GOTERM_BP_FAT	GO:0042110~T cell activation	36	1.49254	0.00136394	920, 941, 5618, 942, 940, 8767, 5664, 3683, 3684, 1499, 3383, 3481, 7040, 6868, 6850, 8440, 7852, 538, 723961, 3630, 3714, 7409, 915, 324, 916, 917, 5532, 7157, 6387, 2280, 4088, 6777, 6776, 2534, 399, 3932, 4690, 896	2278	126	13528	1.69673	0.997935	0.0116856	2.53767
GOTERM_BP_FAT	GO:0008207~C21-steroid hormone metabolic process	8	0.331675	0.00136568	3972, 1583, 133, 2247, 6777, 2488, 1585, 1584	2278	12	13528	3.95903	0.997952	0.0116784	2.54087
GOTERM_BP_FAT	GO:0051496~positive regulation of stress fiber formation	8	0.331675	0.00136568	154796, 6869, 84634, 6863, 387, 5588, 4088, 2475	2278	12	13528	3.95903	0.997952	0.0116784	2.54087
GOTERM_BP_FAT	GO:0010833~telomere maintenance via telomere lengthening	8	0.331675	0.00136568	7014, 7015, 7013, 25913, 5981, 1736, 26277, 54386	2278	12	13528	3.95903	0.997952	0.0116784	2.54087
GOTERM_BP_FAT	GO:0008354~germ cell migration	8	0.331675	0.00136568	8611, 6387, 3688, 7040, 653882, 7852, 3815, 7046, 8613	2278	12	13528	3.95903	0.997952	0.0116784	2.54087
GOTERM_BP_FAT	GO:0007616~long-term memory	8	0.331675	0.00136568	2902, 114, 6869, 6198, 5590, 6863, 107, 1392	2278	12	13528	3.95903	0.997952	0.0116784	2.54087
GOTERM_BP_FAT	GO:0014068~positive regulation of phosphoinositide 3-kinase cascade	8	0.331675	0.00136568	2064, 3481, 2065, 2688, 183, 3479, 723961, 3630, 4734, 3717	2278	12	13528	3.95903	0.997952	0.0116784	2.54087
GOTERM_BP_FAT	GO:0045931~positive regulation of mitotic cell cycle	8	0.331675	0.00136568	7013, 332, 6777, 6776, 8877, 1543, 351, 4091	2278	12	13528	3.95903	0.997952	0.0116784	2.54087
GOTERM_BP_FAT	GO:0035020~regulation of Rac protein signal transduction	8	0.331675	0.00136568	1398, 3265, 64223, 4893, 253260, 3845, 64411, 2475	2278	12	13528	3.95903	0.997952	0.0116784	2.54087
GOTERM_BP_FAT	GO:0032496~response to lipopolysaccharide	25	1.03648	0.00138387	133, 1432, 2149, 5321, 6772, 5970, 8767, 6347, 8651, 496, 5724, 4615, 6352, 1594, 6198, 6868, 6863, 623, 4803, 6777, 9021, 1543, 3654, 4792, 5594	2278	77	13528	1.9281	0.998114	0.0118109	2.57431
GOTERM_BP_FAT	GO:0060541~respiratory system development	32	1.3267	0.00140881	5950, 3280, 2033, 4851, 5664, 2254, 2252, 7472, 1392, 7474, 1499, 8817, 7422, 2246, 2247, 538, 7048, 1544, 7046, 659, 657, 5154, 10253, 93, 5156, 5744, 3791, 2264, 6667, 2255, 5499, 4087	2278	108	13528	1.75957	0.998316	0.0120001	2.62012
GOTERM_BP_FAT	GO:0032989~cellular component morphogenesis	91	3.7728	0.00142408	55437, 4855, 5781, 284217, 5578, 3280, 9241, 4851, 2335, 10403, 54908, 9826, 3480, 6351, 387, 9148, 538, 885, 7852, 886, 5584, 1894, 4218, 5116, 89780, 5747, 2064, 8399, 2065, 55914, 5604, 3091, 25937, 6507, 1385, 4747, 7311, 3717, 56896, 10371, 3688, 6608, 8828, 8829, 3915, 54820, 728590, 7840, 23122, 1813, 3912, 5879, 55558, 6285, 135, 5108, 133, 7471, 1956, 8650, 5048, 10087, 667, 1499, 2068, …	2278	397	13528	1.36123	0.998428	0.0121066	2.64815
GOTERM_BP_FAT	GO:0042176~regulation of protein catabolic process	19	0.787728	0.00143087	2903, 5708, 2905, 7514, 5709, 5970, 5707, 10273, 324, 5045, 4193, 4734, 207, 348, 23327, 83737, 5582, 4092, 9146	2278	52	13528	2.16985	0.998476	0.0121412	2.66061
GOTERM_BP_FAT	GO:0051291~protein heterooligomerization	19	0.787728	0.00143087	3265, 7529, 673, 3710, 5604, 7249, 440567, 1499, 3480, 5571, 5590, 7248, 5564, 2885, 5563, 3667, 3643, 6498, 7388, 6497	2278	52	13528	2.16985	0.998476	0.0121412	2.66061
GOTERM_BP_FAT	GO:0031328~positive regulation of cellular biosynthetic process	146	6.05307	0.00143771	4208, 4303, 6774, 941, 2149, 942, 3280, 2002, 940, 8928, 54106, 3479, 336, 3726, 154, 3480, 3481, 1387, 8878, 51773, 5741, 375790, 5744, 672, 79718, 3091, 1901, 344, 1385, 207, 122042, 208, 3718, 1906, 3717, 348, 728590, 4221, 6777, 1812, 6776, 1814, 6778, 4790, 1816, 4792, 4609, 920, 1432, 5970, 56034, 2071, 440577, 10014, 2068, 7189, 2069, 7040, 7422, 3320, 4090, 7046, 4093, 10413, 5154, 5155, …	2278	685	13528	1.26573	0.998523	0.0121762	2.67317
GOTERM_BP_FAT	GO:0007018~microtubule-based movement	33	1.36816	0.00152081	7846, 347733, 55288, 5048, 667, 647000, 10382, 81565, 10383, 7278, 10381, 7277, 9493, 84790, 3796, 10112, 4157, 89941, 81027, 7280, 84643, 5604, 81930, 1062, 1778, 10376, 4747, 351, 11004, 5590, 1781, 84617, 54820, 203068, 10126, 113457	2278	113	13528	1.73426	0.998987	0.012852	2.8256
GOTERM_BP_FAT	GO:0010720~positive regulation of cell development	23	0.953566	0.0015528	653882, 4851, 5970, 8650, 3815, 650, 5364, 4747, 81565, 7040, 6608, 387, 4803, 9138, 7424, 7074, 4088, 396, 1813, 4089, 4804, 4067, 4086, 4087	2278	69	13528	1.97951	0.999124	0.0130964	2.88422
GOTERM_BP_FAT	GO:0070482~response to oxygen levels	39	1.61692	0.00160178	133, 2033, 3708, 3709, 5664, 5021, 2071, 6347, 1026, 7040, 6868, 7422, 7352, 1387, 481, 5562, 5327, 7852, 9021, 1543, 7046, 4093, 4514, 3714, 3673, 5154, 5155, 5156, 5588, 817, 2321, 3091, 1906, 4508, 1909, 4509, 4088, 6777, 7200, 4089, 7057	2278	141	13528	1.64258	0.999298	0.0134819	2.9739
GOTERM_BP_FAT	GO:0043547~positive regulation of GTPase activity	11	0.456053	0.00162484	84144, 81565, 7248, 395, 5604, 116985, 7249, 1901, 10928, 2775, 85360	2278	22	13528	2.96927	0.999368	0.0136495	3.0161
GOTERM_BP_FAT	GO:0044265~cellular macromolecule catabolic process	153	6.34328	0.00167448	192669, 8881, 338, 9861, 51377, 64682, 6868, 8878, 672, 55851, 79718, 4193, 348, 64326, 728590, 472, 51434, 51433, 4790, 4609, 51592, 57154, 5970, 2072, 10273, 2071, 8945, 7329, 2073, 8651, 51107, 6500, 2068, 7189, 3949, 83464, 10013, 8239, 1643, 9978, 23327, 9021, 4804, 102, 1642, 5699, 5698, 10213, 192670, 26271, 5340, 2966, 996, 7321, 2965, 54205, 7324, 651610, 9184, 991, 7323, 23385, 891, 837…	2278	725	13528	1.25324	0.999495	0.0140379	3.10688
GOTERM_BP_FAT	GO:0045639~positive regulation of myeloid cell differentiation	14	0.580431	0.0017076	1432, 2309, 92, 91, 5196, 3091, 5925, 796, 2778, 3624, 6352, 182, 4254, 6776	2278	33	13528	2.51938	0.999566	0.0142874	3.16739
GOTERM_BP_FAT	GO:0006195~purine nucleotide catabolic process	14	0.580431	0.0017076	4650, 5151, 506, 5140, 9525, 5144, 487, 2071, 498, 513, 8622, 23433, 539, 514	2278	33	13528	2.51938	0.999566	0.0142874	3.16739
GOTERM_BP_FAT	GO:0051952~regulation of amine transport	14	0.580431	0.0017076	135, 11255, 5021, 5020, 156, 3356, 3351, 3358, 183, 1812, 1813, 7200, 1814, 6564	2278	33	13528	2.51938	0.999566	0.0142874	3.16739
GOTERM_BP_FAT	GO:0009636~response to toxin	21	0.870647	0.00170943	1572, 5578, 7298, 5983, 3551, 1026, 1586, 7507, 4747, 3352, 3351, 6198, 10013, 538, 6382, 23063, 1645, 1543, 7046, 4067, 999	2278	61	13528	2.04442	0.999569	0.0142762	3.17073
GOTERM_BP_FAT	GO:0006469~negative regulation of protein kinase activity	27	1.1194	0.00176586	135, 5578, 7249, 1029, 1027, 1026, 3481, 5515, 5518, 723961, 3630, 51422, 1848, 57761, 10253, 10252, 26524, 324, 5170, 5925, 207, 836, 348, 9113, 84335, 4221, 1812, 7532, 1816	2278	87	13528	1.843	0.999667	0.0147173	3.27376
GOTERM_BP_FAT	GO:0034330~cell junction organization	20	0.829187	0.00177648	154796, 50855, 395, 8650, 324, 2335, 5170, 3690, 10395, 7040, 3915, 3678, 4088, 7094, 5584, 7082, 3655, 998, 88, 4092	2278	57	13528	2.0837	0.999682	0.0147781	3.29314
GOTERM_BP_FAT	GO:0006816~calcium ion transport	39	1.61692	0.00183924	2147, 5579, 2149, 4852, 3708, 3709, 487, 5664, 489, 488, 57113, 10800, 2902, 2903, 1447, 2904, 815, 816, 817, 3710, 818, 27032, 9914, 10316, 5532, 5530, 491, 1594, 492, 493, 2280, 2829, 490, 7225, 2534, 1813, 7222, 3932, 56923	2278	142	13528	1.63101	0.999761	0.0152687	3.40759
GOTERM_BP_FAT	GO:0009914~hormone transport	18	0.746269	0.0018682	93, 4036, 818, 338557, 2740, 1081, 2692, 2691, 1906, 51083, 2693, 51738, 1908, 2864, 4160, 11069, 4067, 4087	2278	49	13528	2.18151	0.999791	0.0154791	3.46034
GOTERM_BP_FAT	GO:0050433~regulation of catecholamine secretion	10	0.414594	0.00195263	3356, 135, 3351, 183, 11255, 5021, 1813, 1814, 5020, 156	2278	19	13528	3.12555	0.999857	0.0161441	3.61402
GOTERM_BP_FAT	GO:0009203~ribonucleoside triphosphate catabolic process	10	0.414594	0.00195263	513, 4650, 506, 23433, 9525, 487, 539, 2071, 498, 514	2278	19	13528	3.12555	0.999857	0.0161441	3.61402
GOTERM_BP_FAT	GO:0010907~positive regulation of glucose metabolic process	10	0.414594	0.00195263	3481, 147, 3091, 3667, 3643, 3479, 723961, 3630, 10776, 8660, 207, 646227, 208	2278	19	13528	3.12555	0.999857	0.0161441	3.61402
GOTERM_BP_FAT	GO:0009207~purine ribonucleoside triphosphate catabolic process	10	0.414594	0.00195263	513, 4650, 506, 23433, 9525, 487, 539, 2071, 498, 514	2278	19	13528	3.12555	0.999857	0.0161441	3.61402
GOTERM_BP_FAT	GO:0007098~centrosome cycle	10	0.414594	0.00195263	55835, 1069, 9662, 672, 4869, 4751, 54820, 11190, 9738, 440577, 1499	2278	19	13528	3.12555	0.999857	0.0161441	3.61402
GOTERM_BP_FAT	GO:0030308~negative regulation of cell growth	28	1.16086	0.00195284	11108, 1029, 1027, 1026, 2786, 3624, 1032, 7040, 1031, 623, 2247, 5515, 5518, 57142, 91, 5925, 51079, 4722, 7157, 1594, 10371, 183, 8829, 6696, 186, 4088, 4089, 55558	2278	92	13528	1.80738	0.999857	0.0161165	3.61441
GOTERM_BP_FAT	GO:0042311~vasodilation	12	0.497512	0.00195366	135, 153, 1910, 3672, 136, 186, 3827, 797, 7472, 155, 154, 348	2278	26	13528	2.74087	0.999858	0.0160939	3.61589
GOTERM_BP_FAT	GO:0050994~regulation of lipid catabolic process	12	0.497512	0.00195366	134, 5140, 344, 8660, 336, 345, 207, 208, 8843, 2475, 3481, 3667, 3630, 723961, 338442	2278	26	13528	2.74087	0.999858	0.0160939	3.61589
GOTERM_BP_FAT	GO:0001993~regulation of systemic arterial blood pressure by norepinephrine-epinephrine	6	0.248756	0.00209215	153, 146, 147, 1816, 155, 154	2278	7	13528	5.09018	0.999924	0.0171948	3.86745
GOTERM_BP_FAT	GO:0022401~adaptation of signaling pathway	6	0.248756	0.00209215	2966, 653238, 5338, 1814, 156, 155, 154	2278	7	13528	5.09018	0.999924	0.0171948	3.86745
GOTERM_BP_FAT	GO:0014065~phosphoinositide 3-kinase cascade	6	0.248756	0.00209215	3480, 2064, 2065, 3667, 5295, 1906	2278	7	13528	5.09018	0.999924	0.0171948	3.86745
GOTERM_BP_FAT	GO:0030949~positive regulation of vascular endothelial growth factor receptor signaling pathway	6	0.248756	0.00209215	8817, 7422, 2255, 2321, 2254, 3091	2278	7	13528	5.09018	0.999924	0.0171948	3.86745
GOTERM_BP_FAT	GO:0002029~desensitization of G-protein coupled receptor protein signaling pathway	6	0.248756	0.00209215	2966, 653238, 5338, 1814, 156, 155, 154	2278	7	13528	5.09018	0.999924	0.0171948	3.86745
GOTERM_BP_FAT	GO:0003085~negative regulation of systemic arterial blood pressure	6	0.248756	0.00209215	659, 153, 146, 186, 155, 154	2278	7	13528	5.09018	0.999924	0.0171948	3.86745
GOTERM_BP_FAT	GO:0009111~vitamin catabolic process	6	0.248756	0.00209215	1594, 1591, 1592, 340665, 8074, 56603	2278	7	13528	5.09018	0.999924	0.0171948	3.86745
GOTERM_BP_FAT	GO:0048534~hemopoietic or lymphoid organ development	63	2.61194	0.00217089	4855, 1147, 4853, 940, 643, 3624, 7253, 3676, 2248, 6868, 4254, 6117, 538, 8879, 2067, 89780, 3714, 4318, 3791, 3815, 5925, 3717, 7412, 28514, 3688, 2255, 6777, 4221, 6776, 920, 5664, 1499, 7189, 2068, 10014, 10563, 7040, 6850, 7422, 4090, 7048, 10018, 7046, 10019, 653882, 9734, 799, 915, 324, 9759, 916, 6667, 5532, 7157, 1021, 1399, 9133, 182, 399, 4067, 5295, 3932, 4914, 998	2278	260	13528	1.43895	0.999947	0.0178046	4.01022
GOTERM_BP_FAT	GO:0048469~cell maturation	24	0.995025	0.00218708	137964, 388585, 7855, 5241, 5745, 9985, 375790, 3280, 2309, 1738, 2776, 3791, 26271, 2692, 122042, 1499, 351, 2068, 2069, 994, 7422, 8312, 5139, 891	2278	75	13528	1.90033	0.999951	0.017904	4.03954
GOTERM_BP_FAT	GO:0032388~positive regulation of intracellular transport	13	0.538972	0.00219031	657, 7040, 6608, 387, 5588, 4088, 2932, 5566, 4089, 4734, 7046, 999, 3717	2278	30	13528	2.57337	0.999951	0.0178979	4.04539
GOTERM_BP_FAT	GO:0046620~regulation of organ growth	13	0.538972	0.00219031	5950, 2395, 5747, 183, 2247, 3084, 9241, 2254, 4221, 7048, 1081, 10018, 23493	2278	30	13528	2.57337	0.999951	0.0178979	4.04539
GOTERM_BP_FAT	GO:0030035~microspike assembly	9	0.373134	0.00227862	89846, 26052, 2245, 221472, 3691, 121512, 3655, 998, 88	2278	16	13528	3.34043	0.999967	0.0185801	4.20519
GOTERM_BP_FAT	GO:0046579~positive regulation of Ras protein signal transduction	9	0.373134	0.00227862	3265, 2064, 4893, 9170, 4853, 3845, 3479, 1902, 5879	2278	16	13528	3.34043	0.999967	0.0185801	4.20519
GOTERM_BP_FAT	GO:0033280~response to vitamin D	9	0.373134	0.00227862	1032, 1594, 1591, 7040, 5321, 6696, 4036, 11243, 3643, 632	2278	16	13528	3.34043	0.999967	0.0185801	4.20519
GOTERM_BP_FAT	GO:0006200~ATP catabolic process	9	0.373134	0.00227862	513, 4650, 506, 9525, 487, 539, 2071, 498, 514	2278	16	13528	3.34043	0.999967	0.0185801	4.20519
GOTERM_BP_FAT	GO:0018298~protein-chromophore linkage	9	0.373134	0.00227862	5995, 94233, 221391, 2652, 611, 728458, 5956, 10692, 23596, 6010	2278	16	13528	3.34043	0.999967	0.0185801	4.20519
GOTERM_BP_FAT	GO:0000060~protein import into nucleus, translocation	14	0.580431	0.00234411	2147, 23649, 2149, 5617, 207, 7157, 9372, 3717, 9702, 7040, 2255, 2247, 4792, 5594	2278	34	13528	2.44528	0.999976	0.0190753	4.32355
GOTERM_BP_FAT	GO:0043648~dicarboxylic acid metabolic process	14	0.580431	0.00234411	3420, 1743, 1431, 1738, 4191, 2690, 2271, 6389, 8802, 6390, 3419, 6777, 6776, 3421	2278	34	13528	2.44528	0.999976	0.0190753	4.32355
GOTERM_BP_FAT	GO:0002791~regulation of peptide secretion	17	0.704809	0.00244175	134, 5950, 5140, 5781, 2641, 130399, 3625, 2692, 2691, 5715, 3717, 2693, 51738, 8622, 7200, 1813, 6755	2278	46	13528	2.19468	0.999984	0.0198273	4.49974
GOTERM_BP_FAT	GO:0060078~regulation of postsynaptic membrane potential	11	0.456053	0.00244517	134, 51738, 135, 1020, 2902, 2903, 2904, 3060, 2905, 5532, 5530	2278	23	13528	2.84017	0.999985	0.0198193	4.5059
GOTERM_BP_FAT	GO:0001523~retinoid metabolic process	11	0.456053	0.00244517	5950, 6121, 1592, 340665, 5947, 145226, 9227, 1543, 51109, 9249, 56603	2278	23	13528	2.84017	0.999985	0.0198193	4.5059
GOTERM_BP_FAT	GO:0016101~diterpenoid metabolic process	11	0.456053	0.00244517	5950, 6121, 1592, 340665, 5947, 145226, 9227, 1543, 51109, 9249, 56603	2278	23	13528	2.84017	0.999985	0.0198193	4.5059
GOTERM_BP_FAT	GO:0030307~positive regulation of cell growth	16	0.66335	0.00245684	2395, 2033, 3084, 5607, 207, 3481, 2837, 6868, 4803, 1839, 8877, 58191, 723961, 3630, 102, 552, 7046, 551	2278	42	13528	2.2623	0.999986	0.0198776	4.52695
GOTERM_BP_FAT	GO:0001556~oocyte maturation	8	0.331675	0.00253045	2069, 994, 9985, 2309, 5139, 891, 26271, 122042	2278	13	13528	3.65449	0.99999	0.0204313	4.65953
GOTERM_BP_FAT	GO:0010744~positive regulation of foam cell differentiation	8	0.331675	0.00253045	4023, 338, 8399, 183, 5320, 185, 5196, 4790	2278	13	13528	3.65449	0.99999	0.0204313	4.65953
GOTERM_BP_FAT	GO:0002021~response to dietary excess	8	0.331675	0.00253045	153, 4160, 51052, 130399, 155, 56923, 154, 348	2278	13	13528	3.65449	0.99999	0.0204313	4.65953
GOTERM_BP_FAT	GO:0045086~positive regulation of interleukin-2 biosynthetic process	8	0.331675	0.00253045	920, 941, 942, 5588, 940, 6777, 6776, 916	2278	13	13528	3.65449	0.99999	0.0204313	4.65953
GOTERM_BP_FAT	GO:0070201~regulation of establishment of protein localization	34	1.40962	0.00254932	135, 5950, 9908, 5781, 2932, 1950, 336, 335, 7189, 3481, 7040, 387, 7424, 723961, 3630, 5584, 7046, 657, 7529, 5588, 5566, 5170, 207, 3717, 1020, 6608, 23433, 5590, 4088, 4089, 1813, 1814, 4792, 5295, 999, 5319	2278	121	13528	1.66868	0.99999	0.0205457	4.69349
GOTERM_BP_FAT	GO:0051653~spindle localization	7	0.290216	0.00255939	9183, 1058, 54820, 5048, 10403, 54908, 9700	2278	10	13528	4.15698	0.999991	0.0205896	4.71162
GOTERM_BP_FAT	GO:0003091~renal water homeostasis	7	0.290216	0.00255939	135, 5733, 3827, 1813, 1906, 1585, 551	2278	10	13528	4.15698	0.999991	0.0205896	4.71162
GOTERM_BP_FAT	GO:0051293~establishment of spindle localization	7	0.290216	0.00255939	9183, 1058, 54820, 5048, 10403, 54908, 9700	2278	10	13528	4.15698	0.999991	0.0205896	4.71162
GOTERM_BP_FAT	GO:0002690~positive regulation of leukocyte chemotaxis	7	0.290216	0.00255939	1908, 6387, 6868, 2150, 102, 7057, 1907	2278	10	13528	4.15698	0.999991	0.0205896	4.71162
GOTERM_BP_FAT	GO:0051271~negative regulation of cell motion	21	0.870647	0.00263664	134, 5728, 84634, 5155, 54567, 1027, 10395, 10076, 348, 5340, 10014, 7040, 2247, 186, 1812, 1813, 56288, 1816, 4092, 7057, 64411	2278	63	13528	1.97951	0.999994	0.0211676	4.8505
GOTERM_BP_FAT	GO:0045765~regulation of angiogenesis	21	0.870647	0.00263664	154796, 51564, 2064, 4303, 84432, 1284, 136, 1285, 5196, 9734, 3091, 5054, 5340, 10014, 51738, 2837, 388, 2247, 8877, 5598, 7057	2278	63	13528	1.97951	0.999994	0.0211676	4.8505
GOTERM_BP_FAT	GO:0001952~regulation of cell-matrix adhesion	12	0.497512	0.00280111	5291, 1021, 5728, 5590, 7248, 395, 4088, 7249, 1029, 5295, 7057, 5921	2278	27	13528	2.63935	0.999997	0.0224353	5.14557
GOTERM_BP_FAT	GO:0033673~negative regulation of kinase activity	27	1.1194	0.0029821	135, 5578, 7249, 1029, 1027, 1026, 3481, 5515, 5518, 723961, 3630, 51422, 1848, 57761, 10253, 10252, 26524, 324, 5170, 5925, 207, 836, 348, 9113, 84335, 4221, 1812, 7532, 1816	2278	90	13528	1.78156	0.999999	0.0238276	5.46927
GOTERM_BP_FAT	GO:0045913~positive regulation of carbohydrate metabolic process	10	0.414594	0.00302469	3481, 147, 3091, 3667, 3643, 3479, 723961, 3630, 10776, 8660, 207, 646227, 208	2278	20	13528	2.96927	0.999999	0.0241218	5.54529
GOTERM_BP_FAT	GO:0010676~positive regulation of cellular carbohydrate metabolic process	10	0.414594	0.00302469	3481, 147, 3091, 3667, 3643, 3479, 723961, 3630, 10776, 8660, 207, 646227, 208	2278	20	13528	2.96927	0.999999	0.0241218	5.54529
GOTERM_BP_FAT	GO:0030010~establishment of cell polarity	10	0.414594	0.00302469	9183, 3480, 1058, 284217, 54820, 5048, 10403, 5584, 54908, 9826	2278	20	13528	2.96927	0.999999	0.0241218	5.54529
GOTERM_BP_FAT	GO:0051276~chromosome organization	106	4.39469	0.003035	128312, 10403, 64946, 54908, 2648, 3013, 79885, 3012, 1387, 65057, 51773, 79003, 51564, 9252, 79718, 27127, 9918, 723790, 25836, 8294, 5934, 4221, 5933, 8290, 5931, 8243, 11130, 9985, 23397, 113130, 2072, 440577, 55869, 10014, 121504, 10013, 554313, 10734, 8850, 10592, 3018, 8370, 324, 9759, 26277, 3014, 1062, 3015, 4171, 9232, 3017, 9183, 1058, 7324, 9184, 25913, 23383, 85236, 151246, 83933, 641…	2278	485	13528	1.29791	0.999999	0.0241607	5.56369
GOTERM_BP_FAT	GO:0051606~detection of stimulus	33	1.36816	0.00323053	5330, 5950, 83756, 2916, 846, 10692, 6869, 2792, 94233, 221391, 2793, 80834, 4804, 3673, 2904, 2652, 10886, 2779, 24, 796, 728458, 491, 5995, 2780, 408, 6863, 611, 2534, 5956, 7222, 142, 4609, 23596, 6010	2278	118	13528	1.66078	1	0.0256545	5.91188
GOTERM_BP_FAT	GO:0044089~positive regulation of cellular component biogenesis	5	0.207297	0.00346596	51738, 5578, 5021, 7476, 5020	2278	5	13528	5.93854	1	0.0274534	6.32953
GOTERM_BP_FAT	GO:0035278~gene silencing by miRNA, negative regulation of translation	5	0.207297	0.00346596	192669, 27161, 26523, 27327, 192670	2278	5	13528	5.93854	1	0.0274534	6.32953
GOTERM_BP_FAT	GO:0043568~positive regulation of insulin-like growth factor receptor signaling pathway	5	0.207297	0.00346596	2688, 3479, 2692, 2691, 2693	2278	5	13528	5.93854	1	0.0274534	6.32953
GOTERM_BP_FAT	GO:0045974~regulation of translation, ncRNA-mediated	5	0.207297	0.00346596	192669, 27161, 26523, 27327, 192670	2278	5	13528	5.93854	1	0.0274534	6.32953
GOTERM_BP_FAT	GO:0042753~positive regulation of circadian rhythm	5	0.207297	0.00346596	51738, 2837, 1392, 2691, 5367	2278	5	13528	5.93854	1	0.0274534	6.32953
GOTERM_BP_FAT	GO:0051965~positive regulation of synaptogenesis	5	0.207297	0.00346596	51738, 5578, 5021, 7476, 5020	2278	5	13528	5.93854	1	0.0274534	6.32953
GOTERM_BP_FAT	GO:0045924~regulation of female receptivity	5	0.207297	0.00346596	5020, 552, 1816, 84152, 551	2278	5	13528	5.93854	1	0.0274534	6.32953
GOTERM_BP_FAT	GO:0060158~activation of phospholipase C activity by dopamine receptor signaling pathway	5	0.207297	0.00346596	1812, 2776, 2767, 1813, 1816	2278	5	13528	5.93854	1	0.0274534	6.32953
GOTERM_BP_FAT	GO:0042713~sperm ejaculation	5	0.207297	0.00346596	6869, 92, 5021, 5020, 552	2278	5	13528	5.93854	1	0.0274534	6.32953
GOTERM_BP_FAT	GO:0006271~DNA strand elongation during DNA replication	5	0.207297	0.00346596	2237, 5984, 1763, 5422, 5983	2278	5	13528	5.93854	1	0.0274534	6.32953
GOTERM_BP_FAT	GO:0060180~female mating behavior	5	0.207297	0.00346596	5020, 552, 1816, 84152, 551	2278	5	13528	5.93854	1	0.0274534	6.32953
GOTERM_BP_FAT	GO:0051962~positive regulation of nervous system development	5	0.207297	0.00346596	51738, 5578, 5021, 7476, 5020	2278	5	13528	5.93854	1	0.0274534	6.32953
GOTERM_BP_FAT	GO:0040033~negative regulation of translation, ncRNA-mediated	5	0.207297	0.00346596	192669, 27161, 26523, 27327, 192670	2278	5	13528	5.93854	1	0.0274534	6.32953
GOTERM_BP_FAT	GO:0010639~negative regulation of organelle organization	25	1.03648	0.00351595	2072, 22919, 440577, 10395, 9700, 10013, 65057, 2067, 7014, 699, 7013, 4869, 395, 672, 116985, 324, 1901, 26277, 1062, 54386, 9181, 651610, 472, 25913, 23122, 4085, 23332	2278	82	13528	1.81053	1	0.027796	6.41798
GOTERM_BP_FAT	GO:0030900~forebrain development	40	1.65837	0.00363437	10818, 7471, 1869, 4854, 3280, 440917, 9241, 4851, 5664, 8650, 5021, 5048, 10395, 1499, 7804, 538, 886, 552, 2066, 2902, 6714, 89780, 4036, 6506, 2776, 1385, 2692, 2691, 2775, 351, 1020, 7248, 54820, 1812, 2534, 1813, 2909, 7531, 5879, 55558, 999	2278	152	13528	1.56277	1	0.0286704	6.6272
GOTERM_BP_FAT	GO:0009612~response to mechanical stimulus	19	0.787728	0.0036347	3673, 2904, 6610, 5578, 6772, 5970, 6507, 6347, 650, 5727, 3726, 491, 6869, 6198, 4803, 1277, 2534, 7048, 4609	2278	56	13528	2.01486	1	0.0286232	6.62777
GOTERM_BP_FAT	GO:0048771~tissue remodeling	19	0.787728	0.0036347	2064, 5880, 2065, 147, 5745, 2149, 3091, 1499, 5340, 154, 3676, 7040, 7422, 2255, 183, 186, 538, 5741, 5879	2278	56	13528	2.01486	1	0.0286232	6.62777
GOTERM_BP_FAT	GO:0051057~positive regulation of small GTPase mediated signal transduction	9	0.373134	0.00367406	3265, 2064, 4893, 9170, 4853, 3845, 3479, 1902, 5879	2278	17	13528	3.14393	1	0.0288791	6.69721
GOTERM_BP_FAT	GO:0035195~gene silencing by miRNA	9	0.373134	0.00367406	192669, 4343, 27161, 26523, 27327, 4088, 192670, 4086, 4087	2278	17	13528	3.14393	1	0.0288791	6.69721
GOTERM_BP_FAT	GO:0060070~Wnt receptor signaling pathway through beta-catenin	9	0.373134	0.00367406	595, 7483, 8312, 79718, 6907, 2932, 324, 10076, 1499	2278	17	13528	3.14393	1	0.0288791	6.69721
GOTERM_BP_FAT	GO:0044246~regulation of multicellular organismal metabolic process	9	0.373134	0.00367406	153, 3673, 7040, 2147, 2149, 4160, 3066, 155, 154	2278	17	13528	3.14393	1	0.0288791	6.69721
GOTERM_BP_FAT	GO:0043200~response to amino acid stimulus	9	0.373134	0.00367406	4314, 6750, 6198, 5970, 6506, 8992, 6347, 4067, 2475	2278	17	13528	3.14393	1	0.0288791	6.69721
GOTERM_BP_FAT	GO:0008306~associative learning	9	0.373134	0.00367406	1020, 2902, 6869, 2904, 6863, 2917, 1812, 1813, 1816	2278	17	13528	3.14393	1	0.0288791	6.69721
GOTERM_BP_FAT	GO:0032890~regulation of organic acid transport	9	0.373134	0.00367406	8399, 11255, 7200, 5020, 8660, 6564, 207, 208, 7057	2278	17	13528	3.14393	1	0.0288791	6.69721
GOTERM_BP_FAT	GO:0002053~positive regulation of mesenchymal cell proliferation	9	0.373134	0.00367406	657, 5154, 7422, 394, 2254, 3667, 3791, 7048, 8660	2278	17	13528	3.14393	1	0.0288791	6.69721
GOTERM_BP_FAT	GO:0051924~regulation of calcium ion transport	22	0.912106	0.00368781	135, 805, 2147, 2149, 801, 796, 23566, 846, 2775, 154, 491, 1909, 2771, 2280, 7040, 3973, 3060, 623, 2847, 1812, 808, 1813, 4067, 5319	2278	69	13528	1.89345	1	0.0289356	6.72146
GOTERM_BP_FAT	GO:0010876~lipid localization	41	1.69983	0.00372075	148229, 5950, 338, 84634, 23200, 57205, 10087, 336, 335, 10396, 3949, 5205, 57198, 624, 1645, 57194, 23250, 8399, 301, 9525, 5322, 23120, 24, 344, 130399, 345, 10079, 348, 3973, 79895, 6777, 51761, 6776, 1813, 1814, 26020, 374868, 5406, 56923, 5319, 286410	2278	157	13528	1.55083	1	0.0291404	6.77953
GOTERM_BP_FAT	GO:0030036~actin cytoskeleton organization	55	2.28027	0.00385223	154796, 2919, 29127, 9828, 10395, 9826, 150, 387, 57381, 2245, 221472, 253260, 5584, 261734, 6093, 4650, 5880, 5881, 27032, 5170, 89846, 3688, 4893, 5590, 55615, 5879, 5319, 4690, 3265, 3845, 5048, 553158, 8655, 667, 727758, 4983, 8440, 9322, 23092, 23779, 9475, 54509, 5155, 5898, 395, 116985, 9564, 2693, 51738, 1398, 1020, 10603, 9181, 23433, 7094, 397, 121512, 998	2278	226	13528	1.44522	1	0.0301045	7.01094
GOTERM_BP_FAT	GO:0010740~positive regulation of protein kinase cascade	43	1.78275	0.00387052	2914, 2149, 5970, 2254, 8767, 5617, 3479, 4734, 155, 2475, 154, 1499, 7189, 4615, 3481, 7040, 3357, 389, 9218, 387, 23118, 723961, 3630, 7046, 1894, 2064, 2065, 6453, 27032, 2690, 1902, 23566, 3717, 5494, 2280, 9170, 2688, 183, 8312, 57449, 3643, 4067, 9965, 10783, 142678	2278	167	13528	1.52909	1	0.0301936	7.0431
GOTERM_BP_FAT	GO:0007292~female gamete generation	21	0.870647	0.00395306	2067, 5241, 658, 9985, 5321, 2309, 2488, 26271, 122042, 1907, 8655, 2069, 994, 2492, 183, 651610, 8312, 472, 54361, 8239, 5139, 891	2278	65	13528	1.91861	1	0.0307758	7.18804
GOTERM_BP_FAT	GO:0051098~regulation of binding	40	1.65837	0.00410326	651921, 805, 3084, 2033, 801, 9241, 5970, 8767, 3845, 1029, 440577, 155, 3383, 154, 2068, 10014, 4615, 7040, 65057, 51773, 6497, 3654, 4092, 5580, 3673, 648152, 815, 5588, 5744, 4869, 9759, 3551, 3717, 2280, 6608, 183, 545, 4088, 4221, 808, 4089, 3066, 4792, 5319, 4087	2278	153	13528	1.55256	1	0.031874	7.45126
GOTERM_BP_FAT	GO:0006970~response to osmotic stress	13	0.538972	0.00412092	6750, 3673, 1956, 8065, 5170, 5020, 6870, 7157, 183, 624, 5879, 553, 551	2278	32	13528	2.41253	1	0.0319546	7.48218
GOTERM_BP_FAT	GO:0051297~centrosome organization	13	0.538972	0.00412092	5108, 4869, 672, 11190, 9738, 440577, 1499, 55835, 1069, 9662, 54820, 4751, 9793, 55142	2278	32	13528	2.41253	1	0.0319546	7.48218
GOTERM_BP_FAT	GO:0010741~negative regulation of protein kinase cascade	14	0.580431	0.00419951	5728, 9611, 7249, 324, 8651, 8841, 207, 5515, 5518, 4221, 1813, 1814, 399, 9146	2278	36	13528	2.30943	1	0.0324998	7.61958
GOTERM_BP_FAT	GO:0045165~cell fate commitment	37	1.534	0.00430128	10818, 388585, 4855, 7471, 4854, 4853, 3280, 4851, 5664, 7473, 1499, 2248, 2246, 2247, 4090, 7046, 2066, 3714, 89780, 10253, 10252, 3791, 650, 2264, 836, 7157, 3688, 28514, 6608, 182, 2255, 4221, 4089, 998, 4086, 56603, 4087	2278	139	13528	1.58076	1	0.0332191	7.79721
GOTERM_BP_FAT	GO:0048512~circadian behavior	8	0.331675	0.00433026	51738, 2837, 129521, 1812, 1814, 1392, 2691, 5367	2278	14	13528	3.39345	1	0.0333829	7.84775
GOTERM_BP_FAT	GO:0032233~positive regulation of actin filament bundle formation	8	0.331675	0.00433026	154796, 6869, 84634, 6863, 387, 5588, 4088, 2475	2278	14	13528	3.39345	1	0.0333829	7.84775
GOTERM_BP_FAT	GO:0005979~regulation of glycogen biosynthetic process	8	0.331675	0.00433026	3481, 5500, 3667, 3643, 723961, 3630, 8660, 207, 208, 2475	2278	14	13528	3.39345	1	0.0333829	7.84775
GOTERM_BP_FAT	GO:0010962~regulation of glucan biosynthetic process	8	0.331675	0.00433026	3481, 5500, 3667, 3643, 723961, 3630, 8660, 207, 208, 2475	2278	14	13528	3.39345	1	0.0333829	7.84775
GOTERM_BP_FAT	GO:0032885~regulation of polysaccharide biosynthetic process	8	0.331675	0.00433026	3481, 5500, 3667, 3643, 723961, 3630, 8660, 207, 208, 2475	2278	14	13528	3.39345	1	0.0333829	7.84775
GOTERM_BP_FAT	GO:0010596~negative regulation of endothelial cell migration	8	0.331675	0.00433026	10014, 7040, 2247, 54567, 186, 7057, 5340, 348	2278	14	13528	3.39345	1	0.0333829	7.84775
GOTERM_BP_FAT	GO:0043388~positive regulation of DNA binding	22	0.912106	0.00444944	3673, 805, 815, 5588, 2033, 4869, 801, 5970, 8767, 9759, 3845, 3551, 440577, 3717, 3383, 2068, 10014, 4615, 7040, 183, 808, 65057, 6497, 3654, 5319	2278	70	13528	1.8664	1	0.0342296	8.05525
GOTERM_BP_FAT	GO:0019221~cytokine-mediated signaling pathway	22	0.912106	0.00444944	6774, 6772, 653882, 5970, 5196, 3815, 3845, 1230, 6347, 8651, 3718, 1907, 10603, 2069, 2280, 6376, 7804, 6777, 6776, 729230, 572, 6778, 3654	2278	70	13528	1.8664	1	0.0342296	8.05525
GOTERM_BP_FAT	GO:0030336~negative regulation of cell migration	19	0.787728	0.00449233	134, 5728, 84634, 5155, 54567, 10395, 10076, 348, 5340, 10014, 7040, 2247, 186, 1812, 1813, 1816, 4092, 7057, 64411	2278	57	13528	1.97951	1	0.0344962	8.12983
GOTERM_BP_FAT	GO:0040007~growth	46	1.90713	0.00450611	26281, 5781, 4854, 4853, 4851, 5664, 3479, 2073, 3625, 440577, 2475, 3624, 2068, 81565, 2069, 7040, 8992, 8527, 259230, 2067, 658, 147, 5155, 55914, 93, 5588, 4869, 2309, 2263, 9837, 6506, 1081, 650, 207, 2243, 2261, 5054, 5340, 2260, 351, 6608, 9133, 2255, 7840, 891, 898, 4087	2278	183	13528	1.49275	1	0.0345419	8.15377
GOTERM_BP_FAT	GO:0045429~positive regulation of nitric oxide biosynthetic process	10	0.414594	0.00451146	3481, 3320, 1956, 186, 3643, 723961, 3630, 3269, 207, 1906, 3383, 3717	2278	21	13528	2.82788	1	0.034524	8.16307
GOTERM_BP_FAT	GO:0009146~purine nucleoside triphosphate catabolic process	10	0.414594	0.00451146	513, 4650, 506, 23433, 9525, 487, 539, 2071, 498, 514	2278	21	13528	2.82788	1	0.034524	8.16307
GOTERM_BP_FAT	GO:0050805~negative regulation of synaptic transmission	10	0.414594	0.00451146	134, 3356, 3351, 2771, 1812, 4889, 1813, 2773, 1816, 5367	2278	21	13528	2.82788	1	0.034524	8.16307
GOTERM_BP_FAT	GO:0051318~G1 phase	10	0.414594	0.00451146	1021, 1869, 4303, 995, 8697, 990, 28227, 1017, 4193, 5925	2278	21	13528	2.82788	1	0.034524	8.16307
GOTERM_BP_FAT	GO:0048599~oocyte development	10	0.414594	0.00451146	2069, 994, 9985, 8312, 2309, 54361, 5139, 891, 26271, 122042	2278	21	13528	2.82788	1	0.034524	8.16307
GOTERM_BP_FAT	GO:0042752~regulation of circadian rhythm	10	0.414594	0.00451146	51738, 94233, 2837, 1812, 1814, 1385, 1392, 2691, 5367, 23596	2278	21	13528	2.82788	1	0.034524	8.16307
GOTERM_BP_FAT	GO:0033273~response to vitamin	21	0.870647	0.00479237	595, 5950, 3673, 5154, 5321, 4036, 11243, 5970, 6347, 632, 650, 5020, 5727, 1032, 7252, 1594, 7040, 1591, 6696, 3643, 1543, 898	2278	66	13528	1.88954	1	0.0365774	8.6499
GOTERM_BP_FAT	GO:0046605~regulation of centrosome cycle	6	0.248756	0.00480522	79959, 7514, 672, 4869, 10733, 440577, 9475	2278	8	13528	4.45391	1	0.0366123	8.67211
GOTERM_BP_FAT	GO:0048148~behavioral response to cocaine	6	0.248756	0.00480522	1020, 2912, 147, 1812, 1813, 1814	2278	8	13528	4.45391	1	0.0366123	8.67211
GOTERM_BP_FAT	GO:0051893~regulation of focal adhesion formation	6	0.248756	0.00480522	5728, 7248, 395, 4088, 7249, 7057	2278	8	13528	4.45391	1	0.0366123	8.67211
GOTERM_BP_FAT	GO:0030146~diuresis	6	0.248756	0.00480522	135, 5733, 3827, 1813, 1906, 551	2278	8	13528	4.45391	1	0.0366123	8.67211
GOTERM_BP_FAT	GO:0006734~NADH metabolic process	6	0.248756	0.00480522	3420, 1743, 3419, 2819, 4191, 3421	2278	8	13528	4.45391	1	0.0366123	8.67211
GOTERM_BP_FAT	GO:0051310~metaphase plate congression	7	0.290216	0.00483177	9183, 8697, 113130, 81930, 1062, 81929, 54908	2278	11	13528	3.77907	1	0.0367497	8.71798
GOTERM_BP_FAT	GO:0007062~sister chromatid cohesion	7	0.290216	0.00483177	8243, 9985, 25836, 9126, 23383, 151246, 23047	2278	11	13528	3.77907	1	0.0367497	8.71798
GOTERM_BP_FAT	GO:0007567~parturition	7	0.290216	0.00483177	5737, 59350, 5021, 6347, 1394, 1543, 1392	2278	11	13528	3.77907	1	0.0367497	8.71798
GOTERM_BP_FAT	GO:0010812~negative regulation of cell-substrate adhesion	7	0.290216	0.00483177	5728, 395, 1277, 1029, 5295, 7057, 5921	2278	11	13528	3.77907	1	0.0367497	8.71798
GOTERM_BP_FAT	GO:0042749~regulation of circadian sleep/wake cycle	7	0.290216	0.00483177	51738, 2837, 1812, 1814, 1392, 2691, 5367	2278	11	13528	3.77907	1	0.0367497	8.71798
GOTERM_BP_FAT	GO:0055024~regulation of cardiac muscle tissue development	7	0.290216	0.00483177	5950, 2247, 3084, 9241, 2254, 7048, 23493	2278	11	13528	3.77907	1	0.0367497	8.71798
GOTERM_BP_FAT	GO:0055021~regulation of cardiac muscle growth	7	0.290216	0.00483177	5950, 2247, 3084, 9241, 2254, 7048, 23493	2278	11	13528	3.77907	1	0.0367497	8.71798
GOTERM_BP_FAT	GO:0032006~regulation of TOR signaling pathway	7	0.290216	0.00483177	64223, 7248, 84335, 7249, 253260, 84803, 57521	2278	11	13528	3.77907	1	0.0367497	8.71798
GOTERM_BP_FAT	GO:0045187~regulation of circadian sleep/wake cycle, sleep	7	0.290216	0.00483177	51738, 2837, 1812, 1814, 1392, 2691, 5367	2278	11	13528	3.77907	1	0.0367497	8.71798
GOTERM_BP_FAT	GO:0022410~circadian sleep/wake cycle process	7	0.290216	0.00483177	51738, 2837, 1812, 1814, 1392, 2691, 5367	2278	11	13528	3.77907	1	0.0367497	8.71798
GOTERM_BP_FAT	GO:0007625~grooming behavior	7	0.290216	0.00483177	347148, 1812, 1813, 5020, 552, 56923, 551	2278	11	13528	3.77907	1	0.0367497	8.71798
GOTERM_BP_FAT	GO:0007004~telomere maintenance via telomerase	7	0.290216	0.00483177	7014, 7015, 7013, 25913, 5981, 1736, 54386	2278	11	13528	3.77907	1	0.0367497	8.71798
GOTERM_BP_FAT	GO:0032489~regulation of Cdc42 protein signal transduction	7	0.290216	0.00483177	89846, 81565, 2245, 116985, 221472, 10928, 121512	2278	11	13528	3.77907	1	0.0367497	8.71798
GOTERM_BP_FAT	GO:0002688~regulation of leukocyte chemotaxis	7	0.290216	0.00483177	1908, 6387, 6868, 2150, 102, 7057, 1907	2278	11	13528	3.77907	1	0.0367497	8.71798
GOTERM_BP_FAT	GO:0009650~UV protection	7	0.290216	0.00483177	2068, 2067, 10381, 2237, 2072, 2071, 2073, 4157	2278	11	13528	3.77907	1	0.0367497	8.71798
GOTERM_BP_FAT	GO:0033057~reproductive behavior in a multicellular organism	7	0.290216	0.00483177	2902, 5021, 5020, 552, 1816, 84152, 551	2278	11	13528	3.77907	1	0.0367497	8.71798
GOTERM_BP_FAT	GO:0043088~regulation of Cdc42 GTPase activity	7	0.290216	0.00483177	89846, 81565, 2245, 116985, 221472, 10928, 121512	2278	11	13528	3.77907	1	0.0367497	8.71798
GOTERM_BP_FAT	GO:0060043~regulation of cardiac muscle cell proliferation	7	0.290216	0.00483177	5950, 2247, 3084, 9241, 2254, 7048, 23493	2278	11	13528	3.77907	1	0.0367497	8.71798
GOTERM_BP_FAT	GO:0006665~sphingolipid metabolic process	23	0.953566	0.00492421	55304, 6610, 166929, 653882, 81537, 3815, 125981, 56848, 253782, 91012, 10087, 340485, 5515, 204219, 5518, 3696, 10558, 8877, 9517, 8879, 79603, 259230, 29956, 55331	2278	75	13528	1.82115	1	0.0373786	8.87753
GOTERM_BP_FAT	GO:0006869~lipid transport	38	1.57546	0.00499258	148229, 5950, 338, 84634, 23200, 57205, 10087, 336, 335, 10396, 3949, 5205, 57198, 624, 1645, 57194, 23250, 8399, 301, 9525, 5322, 23120, 24, 344, 345, 10079, 348, 3973, 79895, 51761, 1813, 1814, 26020, 374868, 5406, 56923, 5319, 286410	2278	145	13528	1.55631	1	0.0378256	8.99537
GOTERM_BP_FAT	GO:0009190~cyclic nucleotide biosynthetic process	11	0.456053	0.00505971	135, 114, 133, 115, 112, 113, 109, 108, 107, 111, 196883	2278	25	13528	2.61296	1	0.0382618	9.11093
GOTERM_BP_FAT	GO:0010743~regulation of foam cell differentiation	11	0.456053	0.00505971	3685, 4023, 338, 8399, 183, 5320, 185, 5196, 3690, 4790, 4792	2278	25	13528	2.61296	1	0.0382618	9.11093
GOTERM_BP_FAT	GO:0000186~activation of MAPKK activity	11	0.456053	0.00505971	134, 2771, 84634, 2149, 2247, 1956, 2321, 1950, 7046, 2911, 3717	2278	25	13528	2.61296	1	0.0382618	9.11093
GOTERM_BP_FAT	GO:0006721~terpenoid metabolic process	11	0.456053	0.00505971	5950, 6121, 1592, 340665, 5947, 145226, 9227, 1543, 51109, 9249, 56603	2278	25	13528	2.61296	1	0.0382618	9.11093
GOTERM_BP_FAT	GO:0022415~viral reproductive process	20	0.829187	0.00514721	920, 653214, 645870, 5045, 6347, 5478, 4734, 3383, 8815, 7040, 10663, 6351, 1234, 4986, 9217, 4088, 11059, 7852, 3643, 83737, 5125, 7251	2278	62	13528	1.91566	1	0.0388475	9.26135
GOTERM_BP_FAT	GO:0048641~regulation of skeletal muscle tissue development	12	0.497512	0.00537101	10014, 6198, 375790, 1286, 728590, 4851, 9734, 3065, 9759, 8841, 6233, 154, 7311	2278	29	13528	2.45733	1	0.0404392	9.645
GOTERM_BP_FAT	GO:0043588~skin development	12	0.497512	0.00537101	2068, 1290, 1281, 5154, 50509, 7476, 1277, 1289, 538, 324, 4804, 1278	2278	29	13528	2.45733	1	0.0404392	9.645
GOTERM_BP_FAT	GO:0001541~ovarian follicle development	15	0.621891	0.00539001	658, 2309, 3791, 2252, 2488, 3625, 3624, 2069, 2491, 2492, 3955, 3973, 7422, 894, 898	2278	41	13528	2.17264	1	0.0405125	9.67749
GOTERM_BP_FAT	GO:0000080~G1 phase of mitotic cell cycle	9	0.373134	0.00564791	1021, 1869, 4303, 995, 8697, 990, 28227, 1017, 4193	2278	18	13528	2.96927	1	0.0423447	10.1176
GOTERM_BP_FAT	GO:0010464~regulation of mesenchymal cell proliferation	9	0.373134	0.00564791	657, 5154, 7422, 394, 2254, 3667, 3791, 7048, 8660	2278	18	13528	2.96927	1	0.0423447	10.1176
GOTERM_BP_FAT	GO:0045646~regulation of erythrocyte differentiation	9	0.373134	0.00564791	1021, 1432, 92, 2309, 91, 3091, 6777, 6776, 3624	2278	18	13528	2.96927	1	0.0423447	10.1176
GOTERM_BP_FAT	GO:0010469~regulation of receptor activity	9	0.373134	0.00564791	2069, 6868, 6464, 10013, 5664, 8440, 1950, 5580, 351	2278	18	13528	2.96927	1	0.0423447	10.1176
GOTERM_BP_FAT	GO:0010035~response to inorganic substance	50	2.07297	0.005662	338, 805, 682, 5578, 6772, 801, 3861, 846, 156, 7252, 1583, 7351, 7352, 2244, 538, 2066, 5321, 3710, 6507, 348, 540, 2, 1277, 3643, 4331, 5599, 1956, 2033, 5970, 2266, 4541, 4734, 1026, 1499, 513, 5516, 10013, 23327, 1543, 552, 728294, 595, 2395, 5728, 5154, 5156, 2775, 2243, 5054, 808, 6382, 7057	2278	205	13528	1.44843	1	0.0423785	10.1415
GOTERM_BP_FAT	GO:0002520~immune system development	64	2.6534	0.00582881	4855, 1147, 4853, 940, 643, 3624, 7253, 3676, 2248, 6868, 4254, 6117, 538, 8879, 2067, 89780, 3714, 4318, 3791, 3815, 5925, 3717, 7412, 28514, 3688, 2255, 6777, 4221, 6776, 920, 5664, 1499, 7189, 2068, 10014, 10563, 7040, 6850, 7422, 4090, 7048, 10018, 7046, 10019, 653882, 9734, 799, 915, 324, 9759, 916, 6667, 5532, 7157, 1021, 1399, 9133, 182, 3978, 399, 4067, 5295, 3932, 4914, 998	2278	276	13528	1.37705	1	0.0435312	10.425
GOTERM_BP_FAT	GO:0015833~peptide transport	18	0.746269	0.00587283	121260, 93, 818, 2740, 2692, 2691, 1906, 51083, 2693, 51738, 1908, 2864, 4160, 6565, 51296, 11069, 6564, 4087	2278	54	13528	1.97951	1	0.0437817	10.4997
GOTERM_BP_FAT	GO:0009057~macromolecule catabolic process	159	6.59204	0.00592193	192669, 8881, 338, 9861, 51377, 64682, 6868, 8878, 672, 55851, 79718, 4193, 207, 348, 64326, 8312, 728590, 472, 51434, 51433, 4790, 4609, 57154, 51592, 5970, 2072, 10273, 2071, 8945, 7329, 2073, 8651, 51107, 6500, 2068, 7189, 3949, 7040, 83464, 10013, 8239, 1643, 9978, 23327, 9021, 4804, 102, 1642, 5699, 5698, 10213, 192670, 26271, 5340, 2966, 996, 7321, 2965, 2280, 54205, 7324, 651610, 9184, 991…	2278	781	13528	1.209	1	0.0440683	10.5829
GOTERM_BP_FAT	GO:0030182~neuron differentiation	95	3.93864	0.00620853	6774, 3280, 3480, 80184, 885, 538, 886, 3714, 5747, 7280, 8399, 375790, 1901, 1385, 3717, 1908, 6608, 728590, 1812, 84894, 1813, 3912, 55558, 6285, 26281, 347733, 8650, 5048, 221914, 81565, 2792, 7422, 4803, 4804, 7046, 65078, 8851, 324, 2776, 2779, 2775, 491, 2780, 6387, 182, 203068, 998, 999, 388585, 6121, 5781, 4854, 5578, 4851, 647000, 10381, 7852, 5584, 4157, 2064, 89780, 2065, 5588, 5881, 5…	2278	438	13528	1.28804	1	0.0460822	11.0671
GOTERM_BP_FAT	GO:0001894~tissue homeostasis	20	0.829187	0.00623133	2066, 5950, 1280, 3673, 5880, 5745, 2149, 1297, 5744, 5321, 3791, 2252, 1499, 154, 2271, 7422, 6117, 5741, 5879, 5159	2278	63	13528	1.88525	1	0.0461726	11.1056
GOTERM_BP_FAT	GO:0006643~membrane lipid metabolic process	24	0.995025	0.00633611	10402, 166929, 253782, 56848, 10087, 91012, 340485, 5515, 5518, 3696, 8877, 8879, 79603, 55331, 29956, 259230, 55304, 6610, 653882, 81537, 3815, 125981, 204219, 9517, 10558	2278	81	13528	1.75957	1	0.0468565	11.2819
GOTERM_BP_FAT	GO:0006476~protein amino acid deacetylation	10	0.414594	0.00650989	10014, 79885, 10013, 9734, 3065, 9759, 3066, 83933, 8841, 55869	2278	22	13528	2.69934	1	0.0480363	11.5737
GOTERM_BP_FAT	GO:0008633~activation of pro-apoptotic gene products	10	0.414594	0.00650989	7529, 5599, 4088, 572, 10018, 207, 4609, 5533, 8655, 5534	2278	22	13528	2.69934	1	0.0480363	11.5737
GOTERM_BP_FAT	GO:0009994~oocyte differentiation	10	0.414594	0.00650989	2069, 994, 9985, 8312, 2309, 54361, 5139, 891, 26271, 122042	2278	22	13528	2.69934	1	0.0480363	11.5737
GOTERM_BP_FAT	GO:0030071~regulation of mitotic metaphase/anaphase transition	10	0.414594	0.00650989	10393, 651610, 8697, 7013, 699, 472, 324, 1062, 4085, 10783, 9700	2278	22	13528	2.69934	1	0.0480363	11.5737
GOTERM_BP_FAT	GO:0045321~leukocyte activation	57	2.36318	0.0067006	941, 942, 940, 8767, 643, 3683, 3684, 3383, 7253, 3676, 3481, 6868, 7852, 538, 3579, 3630, 723961, 5580, 3576, 2067, 3714, 7409, 1906, 1907, 7412, 3688, 4088, 6777, 6776, 4690, 920, 5618, 5664, 1499, 7189, 10014, 7040, 6376, 6850, 8440, 7048, 102, 9734, 915, 324, 9759, 916, 917, 5532, 7157, 6387, 2280, 2534, 399, 4067, 5295, 3932, 4914, 896	2278	242	13528	1.39875	1	0.0493327	11.8928
GOTERM_BP_FAT	GO:0050769~positive regulation of neurogenesis	19	0.787728	0.00670716	653882, 4851, 5970, 8650, 3815, 650, 5364, 4747, 81565, 6608, 387, 4803, 9138, 7424, 7074, 396, 1813, 4804, 4067, 4086	2278	59	13528	1.91241	1	0.0493001	11.9037
GOTERM_BP_FAT	GO:0030534~adult behavior	25	1.03648	0.00678662	2902, 2395, 2912, 147, 2906, 4852, 2917, 5048, 6506, 478, 477, 2693, 351, 51738, 7253, 1020, 3358, 4985, 4803, 1812, 7200, 1813, 680, 1814, 4923	2278	86	13528	1.72632	1	0.0497909	12.0364
GOTERM_BP_FAT	GO:0002237~response to molecule of bacterial origin	25	1.03648	0.00678662	133, 1432, 2149, 5321, 6772, 5970, 8767, 6347, 8651, 496, 5724, 4615, 6352, 1594, 6198, 6868, 6863, 623, 4803, 6777, 9021, 1543, 3654, 4792, 5594	2278	86	13528	1.72632	1	0.0497909	12.0364
GOTERM_BP_FAT	GO:0006672~ceramide metabolic process	15	0.621891	0.00685659	6610, 166929, 253782, 125981, 10087, 91012, 340485, 5515, 5518, 3696, 8879, 79603, 259230, 29956, 55331	2278	42	13528	2.12091	1	0.0502118	12.153
GOTERM_BP_FAT	GO:0051279~regulation of release of sequestered calcium ion into cytosol	8	0.331675	0.00695088	1909, 7040, 805, 2147, 3973, 623, 801, 1812, 808, 4067	2278	15	13528	3.16722	1	0.0508049	12.3099
GOTERM_BP_FAT	GO:0007052~mitotic spindle organization	8	0.331675	0.00695088	8243, 57405, 9126, 9493, 10403, 25777, 1778, 10540	2278	15	13528	3.16722	1	0.0508049	12.3099
GOTERM_BP_FAT	GO:0046847~filopodium assembly	8	0.331675	0.00695088	89846, 26052, 2245, 221472, 3691, 121512, 3655, 998	2278	15	13528	3.16722	1	0.0508049	12.3099
GOTERM_BP_FAT	GO:0051588~regulation of neurotransmitter transport	11	0.456053	0.007001	135, 1908, 3358, 3060, 2918, 815, 4803, 1812, 1813, 1814, 4915	2278	26	13528	2.51246	1	0.0510809	12.3932
GOTERM_BP_FAT	GO:0035303~regulation of dephosphorylation	11	0.456053	0.007001	134, 2280, 3673, 7040, 7529, 7248, 440917, 186, 4088, 7531, 10395, 3717	2278	26	13528	2.51246	1	0.0510809	12.3932
GOTERM_BP_FAT	GO:0030510~regulation of BMP signaling pathway	12	0.497512	0.00721248	23592, 51592, 57154, 92, 9241, 10272, 9350, 6497, 5046, 2719, 4092, 4091	2278	30	13528	2.37542	1	0.0525039	12.744
GOTERM_BP_FAT	GO:0046661~male sex differentiation	22	0.912106	0.00755069	595, 5950, 2067, 657, 3714, 3640, 5156, 92, 2254, 5568, 2488, 10388, 122042, 3972, 3973, 54361, 4090, 6777, 6776, 6382, 10018, 4093	2278	73	13528	1.7897	1	0.0548185	13.3021
GOTERM_BP_FAT	GO:0031349~positive regulation of defense response	22	0.912106	0.00755069	3673, 5320, 5321, 5578, 136, 5970, 8767, 4889, 3717, 1909, 4615, 2069, 6352, 6376, 718, 183, 6863, 185, 6777, 6776, 3654, 4792, 653879	2278	73	13528	1.7897	1	0.0548185	13.3021
GOTERM_BP_FAT	GO:0001666~response to hypoxia	35	1.45108	0.00757187	133, 3708, 2033, 3709, 5664, 2071, 6347, 7040, 6868, 7422, 7352, 1387, 481, 5562, 5327, 7852, 9021, 1543, 7046, 4093, 3714, 3673, 5154, 5155, 5588, 817, 2321, 3091, 1906, 1909, 4088, 6777, 7200, 4089, 7057	2278	134	13528	1.55111	1	0.054881	13.3369
GOTERM_BP_FAT	GO:0048762~mesenchymal cell differentiation	17	0.704809	0.00768665	1910, 3084, 4851, 9241, 3091, 650, 1906, 1499, 1909, 1908, 7040, 6608, 1592, 4254, 8828, 340665, 9965	2278	51	13528	1.97951	1	0.0556039	13.5255
GOTERM_BP_FAT	GO:0014031~mesenchymal cell development	17	0.704809	0.00768665	1910, 3084, 4851, 9241, 3091, 650, 1906, 1499, 1909, 1908, 7040, 6608, 1592, 4254, 8828, 340665, 9965	2278	51	13528	1.97951	1	0.0556039	13.5255
GOTERM_BP_FAT	GO:0043524~negative regulation of neuron apoptosis	17	0.704809	0.00768665	6093, 135, 2902, 3265, 2065, 6453, 2149, 3845, 5045, 5046, 5921, 4747, 4893, 727758, 183, 4803, 387, 4914	2278	51	13528	1.97951	1	0.0556039	13.5255
GOTERM_BP_FAT	GO:0051099~positive regulation of binding	23	0.953566	0.0081419	805, 2033, 801, 5970, 8767, 3845, 440577, 3383, 10014, 2068, 4615, 7040, 65057, 6497, 3654, 3673, 815, 5588, 4869, 9759, 3551, 3717, 2280, 183, 808, 5319	2278	78	13528	1.75111	1	0.0587182	14.2696
GOTERM_BP_FAT	GO:0050731~positive regulation of peptidyl-tyrosine phosphorylation	16	0.66335	0.00816905	920, 941, 3479, 916, 2690, 2475, 3717, 3481, 64223, 4254, 6850, 183, 2688, 885, 253260, 723961, 3630, 4067	2278	47	13528	2.02163	1	0.0588157	14.3138
GOTERM_BP_FAT	GO:0051656~establishment of organelle localization	21	0.870647	0.00822957	5747, 8697, 4869, 113130, 5604, 81930, 332, 55288, 10403, 5048, 25777, 1062, 54908, 440577, 9700, 9183, 1058, 54820, 81929, 89941, 998, 10726	2278	69	13528	1.80738	1	0.0591464	14.4122
GOTERM_BP_FAT	GO:0060420~regulation of heart growth	7	0.290216	0.00829787	5950, 2247, 3084, 9241, 2254, 7048, 23493	2278	12	13528	3.46415	1	0.0595304	14.5231
GOTERM_BP_FAT	GO:0006110~regulation of glycolysis	7	0.290216	0.00829787	3481, 5571, 3091, 9759, 3643, 3479, 723961, 3630, 51422	2278	12	13528	3.46415	1	0.0595304	14.5231
GOTERM_BP_FAT	GO:0007143~female meiosis	7	0.290216	0.00829787	2069, 994, 3955, 109, 5347, 10388, 26271	2278	12	13528	3.46415	1	0.0595304	14.5231
GOTERM_BP_FAT	GO:0002792~negative regulation of peptide secretion	7	0.290216	0.00829787	51738, 8622, 5781, 130399, 3625, 5715, 2693	2278	12	13528	3.46415	1	0.0595304	14.5231
GOTERM_BP_FAT	GO:0046676~negative regulation of insulin secretion	7	0.290216	0.00829787	51738, 8622, 5781, 130399, 3625, 5715, 2693	2278	12	13528	3.46415	1	0.0595304	14.5231
GOTERM_BP_FAT	GO:0031577~spindle checkpoint	7	0.290216	0.00829787	651610, 7013, 699, 472, 332, 324, 1062, 4085	2278	12	13528	3.46415	1	0.0595304	14.5231
GOTERM_BP_FAT	GO:0042745~circadian sleep/wake cycle	7	0.290216	0.00829787	51738, 2837, 1812, 1814, 1392, 2691, 5367	2278	12	13528	3.46415	1	0.0595304	14.5231
GOTERM_BP_FAT	GO:0046649~lymphocyte activation	48	1.99005	0.00834475	941, 942, 940, 8767, 643, 3683, 3684, 3383, 7253, 3676, 3481, 6868, 538, 7852, 3630, 723961, 5580, 2067, 3714, 7409, 7412, 3688, 4088, 6777, 6776, 4690, 920, 5618, 5664, 1499, 10014, 7040, 6850, 8440, 9734, 9759, 324, 915, 916, 917, 5532, 7157, 6387, 2280, 2534, 399, 5295, 3932, 4914, 896	2278	199	13528	1.43241	1	0.0597636	14.5992
GOTERM_BP_FAT	GO:0019058~viral infectious cycle	15	0.621891	0.00862419	920, 653214, 645870, 5045, 6347, 5478, 3383, 8815, 10663, 6351, 1234, 4986, 11059, 7852, 83737, 5125, 7251	2278	43	13528	2.07158	1	0.0616133	15.0512
GOTERM_BP_FAT	GO:0051899~membrane depolarization	15	0.621891	0.00862419	134, 135, 2902, 2903, 2904, 2905, 5532, 1906, 5530, 51738, 1020, 5590, 3060, 885, 4092	2278	43	13528	2.07158	1	0.0616133	15.0512
GOTERM_BP_FAT	GO:0042063~gliogenesis	20	0.829187	0.00895736	135, 2064, 2065, 5156, 1956, 4851, 8874, 92737, 3479, 2250, 1499, 2068, 1020, 1021, 1031, 183, 2247, 1840, 1812, 4067	2278	65	13528	1.82724	1	0.0638262	15.5873
GOTERM_BP_FAT	GO:0014061~regulation of norepinephrine secretion	5	0.207297	0.00900878	135, 183, 11255, 5021, 5020	2278	6	13528	4.94879	1	0.0640819	15.6697
GOTERM_BP_FAT	GO:0042320~regulation of circadian sleep/wake cycle, REM sleep	5	0.207297	0.00900878	51738, 2837, 1392, 2691, 5367	2278	6	13528	4.94879	1	0.0640819	15.6697
GOTERM_BP_FAT	GO:0006360~transcription from RNA polymerase I promoter	5	0.207297	0.00900878	284119, 9533, 9015, 7270, 9013	2278	6	13528	4.94879	1	0.0640819	15.6697
GOTERM_BP_FAT	GO:0033683~nucleotide-excision repair, DNA incision	5	0.207297	0.00900878	2068, 2067, 2072, 2071, 2073	2278	6	13528	4.94879	1	0.0640819	15.6697
GOTERM_BP_FAT	GO:0051983~regulation of chromosome segregation	5	0.207297	0.00900878	11004, 84643, 324, 1062, 9700	2278	6	13528	4.94879	1	0.0640819	15.6697
GOTERM_BP_FAT	GO:0035304~regulation of protein amino acid dephosphorylation	5	0.207297	0.00900878	134, 7040, 7529, 440917, 7531, 10395	2278	6	13528	4.94879	1	0.0640819	15.6697
GOTERM_BP_FAT	GO:0014049~positive regulation of glutamate secretion	5	0.207297	0.00900878	135, 2904, 552, 553, 551	2278	6	13528	4.94879	1	0.0640819	15.6697
GOTERM_BP_FAT	GO:0014050~negative regulation of glutamate secretion	5	0.207297	0.00900878	134, 11255, 2917, 7200, 4889	2278	6	13528	4.94879	1	0.0640819	15.6697
GOTERM_BP_FAT	GO:0007220~Notch receptor processing	5	0.207297	0.00900878	92737, 55851, 5664, 23385, 51107	2278	6	13528	4.94879	1	0.0640819	15.6697
GOTERM_BP_FAT	GO:0032230~positive regulation of synaptic transmission, GABAergic	5	0.207297	0.00900878	2066, 135, 6869, 6863, 5021	2278	6	13528	4.94879	1	0.0640819	15.6697
GOTERM_BP_FAT	GO:0010634~positive regulation of epithelial cell migration	5	0.207297	0.00900878	6869, 3673, 6863, 10013, 3091	2278	6	13528	4.94879	1	0.0640819	15.6697
GOTERM_BP_FAT	GO:0006122~mitochondrial electron transport, ubiquinol to cytochrome c	5	0.207297	0.00900878	7381, 727947, 4519, 7388, 440567, 10975, 7384	2278	6	13528	4.94879	1	0.0640819	15.6697
GOTERM_BP_FAT	GO:0042475~odontogenesis of dentine-containing tooth	14	0.580431	0.00902625	657, 3714, 1147, 93, 682, 5156, 650, 1499, 7189, 2249, 6608, 10468, 10018, 3655	2278	39	13528	2.13178	1	0.0641025	15.6977
GOTERM_BP_FAT	GO:0017015~regulation of transforming growth factor beta receptor signaling pathway	14	0.580431	0.00902625	64750, 51592, 8516, 5045, 7040, 1030, 6868, 4088, 4221, 4089, 6498, 6497, 7057, 4087	2278	39	13528	2.13178	1	0.0641025	15.6977
GOTERM_BP_FAT	GO:0051147~regulation of muscle cell differentiation	14	0.580431	0.00902625	10014, 2069, 4303, 375790, 3084, 1286, 728590, 4851, 9734, 3065, 9759, 8841, 1906, 6233, 7311	2278	39	13528	2.13178	1	0.0641025	15.6977
GOTERM_BP_FAT	GO:0030072~peptide hormone secretion	14	0.580431	0.00902625	51738, 1908, 93, 2864, 4160, 818, 11069, 2740, 2692, 2691, 1906, 51083, 4087, 2693	2278	39	13528	2.13178	1	0.0641025	15.6977
GOTERM_BP_FAT	GO:0007044~cell-substrate junction assembly	10	0.414594	0.00912293	3915, 395, 3678, 7094, 5170, 2335, 3690, 3655, 10395, 88	2278	23	13528	2.58198	1	0.0646686	15.8525
GOTERM_BP_FAT	GO:0009154~purine ribonucleotide catabolic process	10	0.414594	0.00912293	513, 4650, 506, 23433, 9525, 487, 539, 2071, 498, 514	2278	23	13528	2.58198	1	0.0646686	15.8525
GOTERM_BP_FAT	GO:0043271~negative regulation of ion transport	10	0.414594	0.00912293	3356, 2771, 7040, 3060, 23327, 1813, 4734, 796, 2775, 154	2278	23	13528	2.58198	1	0.0646686	15.8525
GOTERM_BP_FAT	GO:0031175~neuron projection development	59	2.4461	0.00926608	5781, 5578, 4851, 3480, 7852, 885, 538, 886, 5747, 2064, 89780, 8399, 2065, 5881, 5604, 1385, 4747, 7311, 3717, 2260, 56896, 10371, 6608, 8828, 8829, 728590, 84894, 1813, 3912, 5879, 55558, 4168, 6285, 135, 133, 1956, 8650, 5048, 4734, 667, 81565, 8811, 4803, 4983, 4804, 8997, 65078, 8851, 5728, 3672, 658, 324, 2775, 6233, 351, 51738, 1020, 6387, 56288, 999	2278	256	13528	1.36865	1	0.0655518	16.0811
GOTERM_BP_FAT	GO:0035235~ionotropic glutamate receptor signaling pathway	6	0.248756	0.00931953	2902, 8851, 2903, 2904, 478, 351	2278	9	13528	3.95903	1	0.0658167	16.1664
GOTERM_BP_FAT	GO:0051000~positive regulation of nitric-oxide synthase activity	6	0.248756	0.00931953	3481, 186, 3091, 3845, 723961, 3630, 207, 348	2278	9	13528	3.95903	1	0.0658167	16.1664
GOTERM_BP_FAT	GO:0001976~neurological system process involved in regulation of systemic arterial blood pressure	6	0.248756	0.00931953	146, 147, 183, 186, 1813, 796	2278	9	13528	3.95903	1	0.0658167	16.1664
GOTERM_BP_FAT	GO:0000731~DNA synthesis during DNA repair	6	0.248756	0.00931953	1032, 5424, 5426, 5422, 10714, 5983	2278	9	13528	3.95903	1	0.0658167	16.1664
GOTERM_BP_FAT	GO:0030947~regulation of vascular endothelial growth factor receptor signaling pathway	6	0.248756	0.00931953	8817, 7422, 2255, 2321, 2254, 3091	2278	9	13528	3.95903	1	0.0658167	16.1664
GOTERM_BP_FAT	GO:0042572~retinol metabolic process	6	0.248756	0.00931953	5950, 5947, 145226, 9227, 51109, 9249	2278	9	13528	3.95903	1	0.0658167	16.1664
GOTERM_BP_FAT	GO:0006105~succinate metabolic process	6	0.248756	0.00931953	6389, 8802, 6390, 6777, 6776, 2690	2278	9	13528	3.95903	1	0.0658167	16.1664
GOTERM_BP_FAT	GO:0031334~positive regulation of protein complex assembly	13	0.538972	0.00933885	64223, 7013, 10013, 2932, 8440, 885, 253260, 324, 1027, 7472, 5879, 2475, 4690	2278	35	13528	2.20574	1	0.065847	16.1971
GOTERM_BP_FAT	GO:0048666~neuron development	75	3.10945	0.00934663	6121, 5781, 5578, 3280, 4851, 3480, 80184, 538, 885, 7852, 886, 5584, 89780, 5747, 2064, 8399, 2065, 375790, 5881, 5604, 6507, 1385, 4747, 2260, 7311, 3717, 56896, 10371, 6608, 8828, 8829, 728590, 84894, 7840, 1812, 1813, 3912, 5879, 55558, 4168, 6285, 135, 133, 1956, 8650, 5048, 1608, 4734, 667, 81565, 2792, 8811, 7422, 4803, 4983, 4804, 8997, 65078, 8851, 5728, 3672, 658, 2776, 324, 2779, 2775,…	2278	339	13528	1.31384	1	0.0657983	16.2095
GOTERM_BP_FAT	GO:0006997~nucleus organization	17	0.704809	0.00940651	55746, 1029, 5048, 25777, 51079, 4000, 23345, 836, 50511, 81565, 4928, 54205, 25909, 4926, 2010, 81929, 4609	2278	52	13528	1.94145	1	0.0661053	16.3049
GOTERM_BP_FAT	GO:0060485~mesenchyme development	17	0.704809	0.00940651	1910, 3084, 4851, 9241, 3091, 650, 1906, 1499, 1909, 1908, 7040, 6608, 1592, 4254, 8828, 340665, 9965	2278	52	13528	1.94145	1	0.0661053	16.3049
GOTERM_BP_FAT	GO:0002757~immune response-activating signal transduction	17	0.704809	0.00940651	930, 5970, 8767, 5664, 9564, 916, 7189, 10603, 4615, 719, 6850, 919, 2534, 3654, 4792, 4067, 5594	2278	52	13528	1.94145	1	0.0661053	16.3049
GOTERM_BP_FAT	GO:0002521~leukocyte differentiation	34	1.40962	0.00941769	920, 1147, 940, 5664, 1499, 10014, 7189, 7253, 3676, 7040, 6868, 6850, 538, 7048, 3714, 4318, 653882, 799, 9734, 9759, 915, 3815, 324, 916, 5532, 7157, 7412, 3688, 6777, 6776, 399, 4914, 3932, 5295, 998	2278	131	13528	1.5413	1	0.0660796	16.3227
GOTERM_BP_FAT	GO:0031110~regulation of microtubule polymerization or depolymerization	12	0.497512	0.00951096	348235, 9181, 220134, 7013, 10013, 23122, 324, 22919, 1027, 7472, 23332, 729012, 667	2278	31	13528	2.29879	1	0.0666121	16.4709
GOTERM_BP_FAT	GO:0007270~nerve-nerve synaptic transmission	12	0.497512	0.00951096	135, 1020, 2902, 814, 2918, 2906, 5327, 1812, 1813, 53358, 1814, 1816	2278	31	13528	2.29879	1	0.0666121	16.4709
GOTERM_BP_FAT	GO:0030148~sphingolipid biosynthetic process	12	0.497512	0.00951096	55304, 6610, 204219, 166929, 10558, 9517, 253782, 56848, 79603, 91012, 259230, 29956	2278	31	13528	2.29879	1	0.0666121	16.4709
GOTERM_BP_FAT	GO:0030097~hemopoiesis	55	2.28027	0.00962575	4855, 1147, 4853, 940, 3624, 7253, 3676, 4254, 6868, 6117, 538, 8879, 2067, 3714, 89780, 4318, 3791, 3815, 5925, 3717, 7412, 28514, 3688, 6777, 4221, 6776, 920, 5664, 1499, 7189, 2068, 10014, 7040, 6850, 7422, 4090, 7048, 10019, 653882, 9734, 799, 915, 324, 9759, 916, 6667, 5532, 7157, 1021, 182, 399, 4067, 5295, 3932, 4914, 998	2278	236	13528	1.38398	1	0.0672887	16.653
GOTERM_BP_FAT	GO:0045637~regulation of myeloid cell differentiation	21	0.870647	0.00974163	1432, 1499, 3624, 6352, 4254, 8360, 8362, 121504, 8361, 8364, 8363, 8366, 8365, 554313, 8368, 8367, 11243, 2309, 92, 91, 8370, 5196, 3091, 324, 5925, 796, 2778, 632, 1021, 182, 8294, 6777, 6776, 8359, 4792	2278	70	13528	1.78156	1	0.0679701	16.8365
GOTERM_BP_FAT	GO:0043410~positive regulation of MAPKKK cascade	16	0.66335	0.0100741	2914, 2064, 2149, 8767, 2254, 1902, 23566, 155, 1499, 154, 3481, 9170, 183, 8312, 3643, 3630, 723961, 9965	2278	48	13528	1.97951	1	0.0701103	17.3607
GOTERM_BP_FAT	GO:0007050~cell cycle arrest	28	1.16086	0.0104112	4303, 4853, 6300, 1029, 6794, 1027, 1026, 667, 3624, 1032, 7040, 1030, 1031, 7251, 3576, 8850, 23645, 8065, 324, 5925, 7157, 1594, 8454, 28227, 4088, 4221, 4609, 7057	2278	103	13528	1.61436	1	0.0722712	17.8892
GOTERM_BP_FAT	GO:0030032~lamellipodium assembly	8	0.331675	0.0105849	7410, 25970, 8440, 121512, 10451, 5879, 79902, 4690	2278	16	13528	2.96927	1	0.0733258	18.1601
GOTERM_BP_FAT	GO:0001964~startle response	8	0.331675	0.0105849	135, 2902, 2903, 2904, 2906, 1812, 1813, 1814	2278	16	13528	2.96927	1	0.0733258	18.1601
GOTERM_BP_FAT	GO:0007622~rhythmic behavior	8	0.331675	0.0105849	51738, 2837, 129521, 1812, 1814, 1392, 2691, 5367	2278	16	13528	2.96927	1	0.0733258	18.1601
GOTERM_BP_FAT	GO:0046520~sphingoid biosynthetic process	8	0.331675	0.0105849	6610, 166929, 253782, 56848, 79603, 91012, 259230, 29956	2278	16	13528	2.96927	1	0.0733258	18.1601
GOTERM_BP_FAT	GO:0002026~regulation of the force of heart contraction	8	0.331675	0.0105849	153, 147, 5578, 476, 477, 156, 488, 1907	2278	16	13528	2.96927	1	0.0733258	18.1601
GOTERM_BP_FAT	GO:0051412~response to corticosterone stimulus	8	0.331675	0.0105849	595, 5578, 7200, 552, 1026, 898, 4747, 3726	2278	16	13528	2.96927	1	0.0733258	18.1601
GOTERM_BP_FAT	GO:0050999~regulation of nitric-oxide synthase activity	8	0.331675	0.0105849	3481, 92, 1956, 186, 3091, 3845, 723961, 3630, 207, 348	2278	16	13528	2.96927	1	0.0733258	18.1601
GOTERM_BP_FAT	GO:0032956~regulation of actin cytoskeleton organization	25	1.03648	0.0106178	154796, 84634, 7249, 10395, 2475, 6869, 387, 8440, 253260, 5154, 5588, 395, 116985, 1901, 1906, 5921, 6387, 64223, 23433, 7248, 6863, 9113, 4088, 5879, 4690	2278	89	13528	1.66813	1	0.0734347	18.2113
GOTERM_BP_FAT	GO:0009123~nucleoside monophosphate metabolic process	20	0.829187	0.0106411	5151, 135, 5140, 114, 115, 133, 5141, 112, 113, 5744, 5144, 111, 7298, 196883, 491, 8622, 109, 108, 107, 5741	2278	66	13528	1.79956	1	0.0734792	18.2476
GOTERM_BP_FAT	GO:0010551~regulation of specific transcription from RNA polymerase II promoter	26	1.07794	0.0110815	4208, 388585, 9612, 9611, 3280, 4851, 79718, 1609, 9734, 9759, 23462, 1385, 8841, 23493, 7157, 1499, 10014, 23433, 6907, 4088, 3065, 3066, 4790, 4792, 4092, 5319	2278	94	13528	1.64258	1	0.0763022	18.9303
GOTERM_BP_FAT	GO:0042770~DNA damage response, signal transduction	23	0.953566	0.0111113	8243, 651921, 11200, 4303, 5781, 1432, 84126, 3364, 983, 8525, 595, 648152, 890, 5884, 672, 5883, 80254, 1111, 3014, 7508, 7507, 7157, 651610, 472, 545, 5810	2278	80	13528	1.70733	1	0.0763852	18.9763
GOTERM_BP_FAT	GO:0048610~reproductive cellular process	40	1.65837	0.0111478	148229, 5950, 9985, 2683, 5048, 8613, 2475, 2069, 7040, 4090, 9148, 7852, 5139, 7046, 595, 2067, 3306, 92, 2309, 653882, 1738, 3815, 2488, 26271, 207, 122042, 50511, 8611, 57082, 6387, 2491, 3688, 6198, 994, 9702, 2492, 8312, 54361, 7840, 891, 6382	2278	162	13528	1.46631	1	0.076512	19.0326
GOTERM_BP_FAT	GO:0002684~positive regulation of immune system process	55	2.28027	0.0113907	941, 942, 50852, 940, 8767, 80380, 3383, 4615, 6869, 6868, 572, 2150, 5588, 930, 1907, 7412, 1908, 6777, 6776, 6778, 4792, 5594, 5319, 4690, 920, 136, 5970, 5664, 1026, 1604, 7189, 2069, 7040, 727, 623, 6850, 7422, 919, 8440, 7048, 3654, 102, 3673, 9564, 916, 10603, 6387, 719, 718, 6863, 2534, 83737, 4067, 3932, 653879, 7057	2278	238	13528	1.37235	1	0.0780041	19.4063
GOTERM_BP_FAT	GO:0010001~glial cell differentiation	17	0.704809	0.0114181	135, 2064, 2065, 1956, 4851, 92737, 3479, 2250, 1499, 2068, 1020, 1031, 183, 2247, 1840, 1812, 4067	2278	53	13528	1.90482	1	0.0780676	19.4483
GOTERM_BP_FAT	GO:0006898~receptor-mediated endocytosis	17	0.704809	0.0114181	506, 10268, 10266, 653238, 4036, 4035, 2690, 4734, 1759, 155, 348, 154, 2966, 409, 5338, 58191, 1814, 7048	2278	53	13528	1.90482	1	0.0780676	19.4483
GOTERM_BP_FAT	GO:0016032~viral reproduction	21	0.870647	0.0114689	920, 50855, 653214, 645870, 5045, 6347, 5478, 4734, 3383, 8815, 7040, 10663, 6351, 1234, 4986, 9217, 4088, 11059, 7852, 3643, 83737, 5125, 7251	2278	71	13528	1.75647	1	0.0782861	19.5264
GOTERM_BP_FAT	GO:0003001~generation of a signal involved in cell-cell signaling	24	0.995025	0.0116997	2914, 2912, 93, 4036, 338557, 818, 11255, 7476, 2740, 1081, 2692, 2691, 1906, 51083, 2693, 51738, 1908, 6850, 2864, 4160, 11069, 4915, 4067, 4087	2278	85	13528	1.67676	1	0.0796866	19.8795
GOTERM_BP_FAT	GO:0034367~macromolecular complex remodeling	9	0.373134	0.0118759	4023, 338, 183, 5320, 185, 344, 336, 345, 348	2278	20	13528	2.67234	1	0.0807227	20.1479
GOTERM_BP_FAT	GO:0034368~protein-lipid complex remodeling	9	0.373134	0.0118759	4023, 338, 183, 5320, 185, 344, 336, 345, 348	2278	20	13528	2.67234	1	0.0807227	20.1479
GOTERM_BP_FAT	GO:0034369~plasma lipoprotein particle remodeling	9	0.373134	0.0118759	4023, 338, 183, 5320, 185, 344, 336, 345, 348	2278	20	13528	2.67234	1	0.0807227	20.1479
GOTERM_BP_FAT	GO:0050906~detection of stimulus involved in sensory perception	13	0.538972	0.0119085	5950, 5330, 3673, 2904, 83756, 2779, 796, 491, 2780, 80834, 2534, 4609, 6010	2278	36	13528	2.14447	1	0.0808163	20.1976
GOTERM_BP_FAT	GO:0051603~proteolysis involved in cellular protein catabolic process	123	5.0995	0.0122378	8881, 9861, 51377, 64682, 6868, 8878, 672, 79718, 55851, 4193, 64326, 728590, 51434, 51433, 4790, 51592, 57154, 5970, 10273, 8945, 7329, 8651, 51107, 6500, 7189, 83464, 10013, 8239, 1643, 23327, 9978, 9021, 4804, 102, 5699, 1642, 5698, 10213, 26271, 5340, 996, 7321, 7324, 991, 9184, 7323, 23385, 891, 83737, 5682, 57534, 10193, 5686, 5685, 5684, 983, 5683, 10393, 9491, 8835, 9101, 5887, 11059, 115…	2278	600	13528	1.2174	1	0.0828455	20.6969
GOTERM_BP_FAT	GO:0051153~regulation of striated muscle cell differentiation	12	0.497512	0.0123343	10014, 375790, 3084, 1286, 728590, 4851, 9734, 3065, 9759, 8841, 1906, 6233, 7311	2278	32	13528	2.22695	1	0.0833511	20.8428
GOTERM_BP_FAT	GO:0043062~extracellular structure organization	40	1.65837	0.0123368	1292, 1290, 8516, 2149, 92737, 2683, 7476, 3339, 7477, 3381, 1499, 2068, 7448, 1289, 538, 7046, 2066, 1280, 2064, 5747, 1281, 375790, 4318, 5156, 1284, 26052, 3371, 351, 491, 2280, 59350, 7248, 183, 3915, 50509, 1812, 1277, 1813, 1278, 999	2278	163	13528	1.45731	1	0.0832439	20.8465
GOTERM_BP_FAT	GO:0003012~muscle system process	41	1.69983	0.0123498	6752, 1910, 136, 5144, 5664, 3827, 5021, 2767, 3479, 10087, 156, 9826, 51083, 10014, 6869, 5348, 8811, 1131, 6865, 4090, 2010, 624, 148, 817, 9759, 10316, 3551, 2775, 1906, 1241, 1907, 1909, 1908, 6198, 2280, 183, 10911, 7433, 1812, 1813, 88	2278	168	13528	1.44929	1	0.0832056	20.8662
GOTERM_BP_FAT	GO:0001101~response to acid	10	0.414594	0.0124567	4314, 6750, 6714, 6198, 5970, 6506, 8992, 6347, 4067, 2475	2278	24	13528	2.47439	1	0.0837753	21.0273
GOTERM_BP_FAT	GO:0009143~nucleoside triphosphate catabolic process	10	0.414594	0.0124567	513, 4650, 506, 23433, 9525, 487, 539, 2071, 498, 514	2278	24	13528	2.47439	1	0.0837753	21.0273
GOTERM_BP_FAT	GO:0000723~telomere maintenance	11	0.456053	0.012555	7014, 7015, 7013, 25913, 2072, 5981, 1736, 26277, 65057, 142, 54386	2278	28	13528	2.333	1	0.0842876	21.1753
GOTERM_BP_FAT	GO:0007159~leukocyte adhesion	11	0.456053	0.012555	6093, 3676, 7412, 3688, 727758, 6850, 3689, 3678, 796, 3683, 3684, 3383	2278	28	13528	2.333	1	0.0842876	21.1753
GOTERM_BP_FAT	GO:0046822~regulation of nucleocytoplasmic transport	18	0.746269	0.0126476	657, 5781, 9908, 5588, 2932, 5566, 1029, 4734, 3717, 1020, 7040, 6608, 387, 4088, 4089, 7046, 4792, 999	2278	58	13528	1.843	1	0.0847611	21.3143
GOTERM_BP_FAT	GO:0055067~monovalent inorganic cation homeostasis	15	0.621891	0.0132229	506, 1910, 817, 50617, 495, 7157, 51606, 1585, 1906, 479, 183, 480, 23327, 8992, 525	2278	45	13528	1.97951	1	0.0883357	22.1732
GOTERM_BP_FAT	GO:0001759~induction of an organ	7	0.290216	0.0132414	10818, 2248, 2255, 2246, 10252, 2247, 2264	2278	13	13528	3.19768	1	0.0883251	22.2007
GOTERM_BP_FAT	GO:0006972~hyperosmotic response	7	0.290216	0.0132414	6750, 5170, 5020, 6870, 553, 5879, 551	2278	13	13528	3.19768	1	0.0883251	22.2007
GOTERM_BP_FAT	GO:0050995~negative regulation of lipid catabolic process	7	0.290216	0.0132414	134, 5140, 3481, 723961, 3630, 336, 338442, 345, 207, 8843	2278	13	13528	3.19768	1	0.0883251	22.2007
GOTERM_BP_FAT	GO:0046697~decidualization	7	0.290216	0.0132414	51738, 1594, 5321, 6696, 682, 2693, 3726	2278	13	13528	3.19768	1	0.0883251	22.2007
GOTERM_BP_FAT	GO:0045907~positive regulation of vasoconstriction	7	0.290216	0.0132414	3356, 6869, 2837, 2149, 552, 4886, 551	2278	13	13528	3.19768	1	0.0883251	22.2007
GOTERM_BP_FAT	GO:0032583~regulation of gene-specific transcription	34	1.40962	0.0132575	4208, 388585, 3280, 4851, 1609, 23462, 3479, 1027, 8841, 1499, 10014, 3481, 6907, 723961, 3630, 4092, 9612, 9611, 79718, 3091, 9734, 9759, 5705, 1385, 650, 7157, 23493, 23433, 4088, 3065, 3066, 3643, 4790, 4792, 4087, 5319	2278	134	13528	1.50679	1	0.0882996	22.2247
GOTERM_BP_FAT	GO:0000910~cytokinesis	14	0.580431	0.0141267	6093, 11258, 3619, 29127, 332, 27183, 324, 9826, 5921, 9700, 25909, 9212, 727758, 5347, 9475	2278	41	13528	2.0278	1	0.093711	23.5048
GOTERM_BP_FAT	GO:0034329~cell junction assembly	14	0.580431	0.0141267	154796, 395, 3915, 3678, 7094, 5170, 2335, 324, 3690, 3655, 7082, 10395, 4092, 88	2278	41	13528	2.0278	1	0.093711	23.5048
GOTERM_BP_FAT	GO:0002790~peptide secretion	14	0.580431	0.0141267	51738, 1908, 93, 2864, 4160, 818, 11069, 2740, 2692, 2691, 1906, 51083, 4087, 2693	2278	41	13528	2.0278	1	0.093711	23.5048
GOTERM_BP_FAT	GO:0044257~cellular protein catabolic process	123	5.0995	0.0143885	8881, 9861, 51377, 64682, 6868, 8878, 672, 79718, 55851, 4193, 64326, 728590, 51434, 51433, 4790, 51592, 57154, 5970, 10273, 8945, 7329, 8651, 51107, 6500, 7189, 83464, 10013, 8239, 1643, 23327, 9978, 9021, 4804, 102, 5699, 1642, 5698, 10213, 26271, 5340, 996, 7321, 7324, 991, 9184, 7323, 23385, 891, 83737, 5682, 57534, 10193, 5686, 5685, 5684, 983, 5683, 10393, 9491, 8835, 9101, 5887, 11059, 115…	2278	603	13528	1.21134	1	0.0952362	23.8865
GOTERM_BP_FAT	GO:0030029~actin filament-based process	55	2.28027	0.0145352	154796, 2919, 29127, 9828, 10395, 9826, 150, 387, 57381, 2245, 221472, 253260, 5584, 261734, 6093, 4650, 5880, 5881, 27032, 5170, 89846, 3688, 4893, 5590, 55615, 5879, 5319, 4690, 3265, 3845, 5048, 553158, 8655, 667, 727758, 4983, 8440, 9322, 23092, 23779, 9475, 54509, 5155, 5898, 395, 116985, 9564, 2693, 51738, 1398, 1020, 10603, 9181, 23433, 7094, 397, 121512, 998	2278	241	13528	1.35527	1	0.0960267	24.0996
GOTERM_BP_FAT	GO:0052548~regulation of endopeptidase activity	23	0.953566	0.0148926	135, 842, 2147, 2149, 7013, 1285, 6772, 332, 1029, 5045, 10395, 7157, 1032, 54205, 3164, 4088, 4221, 885, 572, 3932, 4609, 999, 4091	2278	82	13528	1.66569	1	0.0981431	24.6163
GOTERM_BP_FAT	GO:0007281~germ cell development	27	1.1194	0.0149072	5950, 9985, 5048, 2475, 2069, 4090, 9148, 7852, 5139, 2067, 3306, 2309, 653882, 1738, 3815, 26271, 122042, 207, 50511, 57082, 6387, 6198, 994, 9702, 8312, 54361, 7840, 891	2278	101	13528	1.58753	1	0.0980934	24.6373
GOTERM_BP_FAT	GO:0032320~positive regulation of Ras GTPase activity	8	0.331675	0.0154224	84144, 81565, 7248, 5604, 116985, 1901, 10928, 85360	2278	17	13528	2.79461	1	0.101186	25.3762
GOTERM_BP_FAT	GO:0070555~response to interleukin-1	8	0.331675	0.0154224	4615, 6714, 5578, 5970, 8767, 9759, 2690, 3654	2278	17	13528	2.79461	1	0.101186	25.3762
GOTERM_BP_FAT	GO:0014033~neural crest cell differentiation	12	0.497512	0.0157515	1909, 1908, 1910, 6608, 1592, 4254, 8828, 3084, 340665, 3091, 9965, 1906	2278	33	13528	2.15947	1	0.103097	25.8445
GOTERM_BP_FAT	GO:0050851~antigen receptor-mediated signaling pathway	12	0.497512	0.0157515	7189, 10603, 6850, 930, 919, 5664, 8767, 9564, 2534, 916, 4067, 5594	2278	33	13528	2.15947	1	0.103097	25.8445
GOTERM_BP_FAT	GO:0014032~neural crest cell development	12	0.497512	0.0157515	1909, 1908, 1910, 6608, 1592, 4254, 8828, 3084, 340665, 3091, 9965, 1906	2278	33	13528	2.15947	1	0.103097	25.8445
GOTERM_BP_FAT	GO:0051640~organelle localization	25	1.03648	0.0160314	8697, 113130, 55288, 332, 487, 5048, 10403, 25777, 440577, 54908, 9700, 81565, 10013, 89941, 5747, 4869, 81930, 5604, 5362, 1062, 9183, 1058, 54820, 81929, 998, 10726	2278	92	13528	1.61373	1	0.104694	26.2406
GOTERM_BP_FAT	GO:0032970~regulation of actin filament-based process	25	1.03648	0.0160314	154796, 84634, 7249, 10395, 2475, 6869, 387, 8440, 253260, 5154, 5588, 395, 116985, 1901, 1906, 5921, 6387, 64223, 23433, 7248, 6863, 9113, 4088, 5879, 4690	2278	92	13528	1.61373	1	0.104694	26.2406
GOTERM_BP_FAT	GO:0001953~negative regulation of cell-matrix adhesion	6	0.248756	0.0160797	5728, 395, 1029, 5295, 7057, 5921	2278	10	13528	3.56313	1	0.104845	26.3088
GOTERM_BP_FAT	GO:0043129~surfactant homeostasis	6	0.248756	0.0160797	2066, 7422, 5321, 5744, 3791, 2252	2278	10	13528	3.56313	1	0.104845	26.3088
GOTERM_BP_FAT	GO:0045725~positive regulation of glycogen biosynthetic process	6	0.248756	0.0160797	3481, 3667, 3643, 723961, 3630, 8660, 207, 208	2278	10	13528	3.56313	1	0.104845	26.3088
GOTERM_BP_FAT	GO:0048875~chemical homeostasis within a tissue	6	0.248756	0.0160797	2066, 7422, 5321, 5744, 3791, 2252	2278	10	13528	3.56313	1	0.104845	26.3088
GOTERM_BP_FAT	GO:0043266~regulation of potassium ion transport	6	0.248756	0.0160797	134, 3356, 3060, 1812, 1813, 154	2278	10	13528	3.56313	1	0.104845	26.3088
GOTERM_BP_FAT	GO:0032891~negative regulation of organic acid transport	6	0.248756	0.0160797	11255, 8660, 6564, 207, 208, 7057	2278	10	13528	3.56313	1	0.104845	26.3088
GOTERM_BP_FAT	GO:0010810~regulation of cell-substrate adhesion	15	0.621891	0.0161371	5728, 395, 7249, 1029, 5921, 7448, 5291, 1021, 5590, 7248, 6696, 4088, 1277, 5295, 7057	2278	46	13528	1.93648	1	0.105052	26.3897
GOTERM_BP_FAT	GO:0006281~DNA repair	63	2.61194	0.0162185	63967, 1763, 7298, 5984, 5985, 5887, 6117, 5885, 10714, 6119, 6118, 2067, 653238, 5884, 672, 5883, 5981, 5983, 5982, 7508, 7507, 114799, 545, 472, 4221, 8243, 651921, 4331, 1453, 1454, 84126, 2072, 2071, 2073, 3364, 57804, 1032, 2068, 9126, 157570, 5422, 9978, 1643, 5111, 1642, 22897, 5427, 648152, 5424, 5425, 5426, 1111, 3014, 7157, 9232, 2966, 2965, 1022, 2237, 651610, 144715, 3978, 5810, 902, …	2278	284	13528	1.31735	1	0.105407	26.5043
GOTERM_BP_FAT	GO:0030856~regulation of epithelial cell differentiation	11	0.456053	0.0163361	595, 1594, 1030, 4855, 5618, 4851, 6777, 6776, 324, 7046, 1499	2278	29	13528	2.25255	1	0.105985	26.6696
GOTERM_BP_FAT	GO:0032200~telomere organization	11	0.456053	0.0163361	7014, 7015, 7013, 25913, 2072, 5981, 1736, 26277, 65057, 142, 54386	2278	29	13528	2.25255	1	0.105985	26.6696
GOTERM_BP_FAT	GO:0045884~regulation of survival gene product expression	9	0.373134	0.0164078	4208, 84335, 6777, 6776, 2099, 7046, 6502, 207, 4609	2278	21	13528	2.54509	1	0.106277	26.7702
GOTERM_BP_FAT	GO:0045923~positive regulation of fatty acid metabolic process	9	0.373134	0.0164078	183, 5321, 3667, 8660, 344, 552, 208, 2693, 551	2278	21	13528	2.54509	1	0.106277	26.7702
GOTERM_BP_FAT	GO:0001754~eye photoreceptor cell differentiation	9	0.373134	0.0164078	2780, 2792, 7422, 6774, 80184, 7840, 2779, 5584, 4915	2278	21	13528	2.54509	1	0.106277	26.7702
GOTERM_BP_FAT	GO:0016441~posttranscriptional gene silencing	9	0.373134	0.0164078	192669, 4343, 27161, 26523, 27327, 4088, 192670, 4086, 4087	2278	21	13528	2.54509	1	0.106277	26.7702
GOTERM_BP_FAT	GO:0043255~regulation of carbohydrate biosynthetic process	9	0.373134	0.0164078	3481, 5500, 3667, 3643, 723961, 3630, 10776, 8660, 207, 646227, 208, 2475	2278	21	13528	2.54509	1	0.106277	26.7702
GOTERM_BP_FAT	GO:0035194~posttranscriptional gene silencing by RNA	9	0.373134	0.0164078	192669, 4343, 27161, 26523, 27327, 4088, 192670, 4086, 4087	2278	21	13528	2.54509	1	0.106277	26.7702
GOTERM_BP_FAT	GO:0030514~negative regulation of BMP signaling pathway	9	0.373134	0.0164078	23592, 51592, 57154, 9241, 10272, 9350, 6497, 4092, 4091	2278	21	13528	2.54509	1	0.106277	26.7702
GOTERM_BP_FAT	GO:0001659~temperature homeostasis	9	0.373134	0.0164078	134, 3356, 153, 6774, 5733, 1812, 1813, 155, 154	2278	21	13528	2.54509	1	0.106277	26.7702
GOTERM_BP_FAT	GO:0015909~long-chain fatty acid transport	9	0.373134	0.0164078	84634, 3973, 301, 5322, 1813, 1814, 624, 56923, 5319	2278	21	13528	2.54509	1	0.106277	26.7702
GOTERM_BP_FAT	GO:0030163~protein catabolic process	126	5.22388	0.0164096	8881, 9861, 51377, 64682, 6868, 8878, 672, 79718, 55851, 4193, 207, 64326, 8312, 728590, 51434, 51433, 4790, 51592, 57154, 5970, 10273, 8945, 7329, 8651, 51107, 6500, 7189, 83464, 10013, 8239, 1643, 23327, 9978, 9021, 4804, 102, 5699, 1642, 5698, 10213, 26271, 5340, 996, 7321, 7324, 991, 9184, 7323, 23385, 891, 83737, 5682, 57534, 10193, 5686, 5685, 5684, 2475, 983, 5683, 10393, 9491, 8835, 9101,…	2278	622	13528	1.20298	1	0.106138	26.7727
GOTERM_BP_FAT	GO:0050878~regulation of body fluid levels	35	1.45108	0.0165347	135, 2147, 64805, 2149, 5733, 3827, 7450, 2768, 10672, 2266, 5020, 6343, 2837, 2244, 9002, 5327, 554, 2150, 2151, 551, 1281, 3673, 5196, 187, 2776, 3690, 1585, 5054, 2243, 1906, 5340, 5028, 5291, 7432, 1813	2278	141	13528	1.47411	1	0.106758	26.948
GOTERM_BP_FAT	GO:0032273~positive regulation of protein polymerization	10	0.414594	0.0166175	64223, 7013, 8440, 253260, 324, 1027, 7472, 5879, 2475, 4690	2278	25	13528	2.37542	1	0.107116	27.0637
GOTERM_BP_FAT	GO:0032768~regulation of monooxygenase activity	10	0.414594	0.0166175	1594, 3481, 92, 1956, 186, 3091, 3845, 723961, 3630, 4790, 207, 348	2278	25	13528	2.37542	1	0.107116	27.0637
GOTERM_BP_FAT	GO:0009261~ribonucleotide catabolic process	10	0.414594	0.0166175	513, 4650, 506, 23433, 9525, 487, 539, 2071, 498, 514	2278	25	13528	2.37542	1	0.107116	27.0637
GOTERM_BP_FAT	GO:0046530~photoreceptor cell differentiation	10	0.414594	0.0166175	2780, 6121, 2792, 7422, 6774, 80184, 7840, 2779, 5584, 4915	2278	25	13528	2.37542	1	0.107116	27.0637
GOTERM_BP_FAT	GO:0048742~regulation of skeletal muscle fiber development	10	0.414594	0.0166175	10014, 375790, 1286, 728590, 4851, 9734, 3065, 9759, 8841, 6233, 7311	2278	25	13528	2.37542	1	0.107116	27.0637
GOTERM_BP_FAT	GO:0045938~positive regulation of circadian sleep/wake cycle, sleep	4	0.165837	0.0166508	51738, 2837, 2691, 5367	2278	4	13528	5.93854	1	0.107169	27.1101
GOTERM_BP_FAT	GO:0014826~vein smooth muscle contraction	4	0.165837	0.0166508	1908, 1910, 1906, 1907	2278	4	13528	5.93854	1	0.107169	27.1101
GOTERM_BP_FAT	GO:0046621~negative regulation of organ growth	4	0.165837	0.0166508	5747, 2395, 4221, 1081	2278	4	13528	5.93854	1	0.107169	27.1101
GOTERM_BP_FAT	GO:0007262~STAT protein nuclear translocation	4	0.165837	0.0166508	2147, 2149, 5617, 3717	2278	4	13528	5.93854	1	0.107169	27.1101
GOTERM_BP_FAT	GO:0006198~cAMP catabolic process	4	0.165837	0.0166508	5151, 8622, 5140, 5144	2278	4	13528	5.93854	1	0.107169	27.1101
GOTERM_BP_FAT	GO:0002118~aggressive behavior	4	0.165837	0.0166508	6869, 5020, 552, 551	2278	4	13528	5.93854	1	0.107169	27.1101
GOTERM_BP_FAT	GO:0016233~telomere capping	4	0.165837	0.0166508	7014, 25913, 65057, 54386	2278	4	13528	5.93854	1	0.107169	27.1101
GOTERM_BP_FAT	GO:0070472~regulation of uterine smooth muscle contraction	4	0.165837	0.0166508	6869, 5021, 5020, 6870	2278	4	13528	5.93854	1	0.107169	27.1101
GOTERM_BP_FAT	GO:0007091~mitotic metaphase/anaphase transition	4	0.165837	0.0166508	996, 8697, 324, 701	2278	4	13528	5.93854	1	0.107169	27.1101
GOTERM_BP_FAT	GO:0010748~negative regulation of plasma membrane long-chain fatty acid transport	4	0.165837	0.0166508	8660, 207, 208, 7057	2278	4	13528	5.93854	1	0.107169	27.1101
GOTERM_BP_FAT	GO:0032455~nerve growth factor processing	4	0.165837	0.0166508	4803, 5045, 5046, 5125	2278	4	13528	5.93854	1	0.107169	27.1101
GOTERM_BP_FAT	GO:0003079~positive regulation of natriuresis	4	0.165837	0.0166508	6869, 6863, 5020, 552	2278	4	13528	5.93854	1	0.107169	27.1101
GOTERM_BP_FAT	GO:0070474~positive regulation of uterine smooth muscle contraction	4	0.165837	0.0166508	6869, 5021, 5020, 6870	2278	4	13528	5.93854	1	0.107169	27.1101
GOTERM_BP_FAT	GO:0003057~regulation of the force of heart contraction by chemical signal	4	0.165837	0.0166508	153, 147, 156, 1907	2278	4	13528	5.93854	1	0.107169	27.1101
GOTERM_BP_FAT	GO:0051497~negative regulation of stress fiber formation	4	0.165837	0.0166508	395, 116985, 1901, 10395	2278	4	13528	5.93854	1	0.107169	27.1101
GOTERM_BP_FAT	GO:0010746~regulation of plasma membrane long-chain fatty acid transport	4	0.165837	0.0166508	8660, 207, 208, 7057	2278	4	13528	5.93854	1	0.107169	27.1101
GOTERM_BP_FAT	GO:0033860~regulation of NAD(P)H oxidase activity	4	0.165837	0.0166508	3481, 183, 185, 723961, 3630, 1816	2278	4	13528	5.93854	1	0.107169	27.1101
GOTERM_BP_FAT	GO:0010799~regulation of peptidyl-threonine phosphorylation	4	0.165837	0.0166508	7040, 8312, 51422, 4092	2278	4	13528	5.93854	1	0.107169	27.1101
GOTERM_BP_FAT	GO:0001547~antral ovarian follicle growth	4	0.165837	0.0166508	2069, 658, 2309, 898	2278	4	13528	5.93854	1	0.107169	27.1101
GOTERM_BP_FAT	GO:0060397~JAK-STAT cascade involved in growth hormone signaling pathway	4	0.165837	0.0166508	6774, 6777, 6776, 3717	2278	4	13528	5.93854	1	0.107169	27.1101
GOTERM_BP_FAT	GO:0032211~negative regulation of telomere maintenance via telomerase	4	0.165837	0.0166508	7013, 25913, 26277, 65057	2278	4	13528	5.93854	1	0.107169	27.1101
GOTERM_BP_FAT	GO:0070723~response to cholesterol	4	0.165837	0.0166508	7040, 7048, 7046, 4087	2278	4	13528	5.93854	1	0.107169	27.1101
GOTERM_BP_FAT	GO:0051591~response to cAMP	14	0.580431	0.0173857	682, 6772, 5322, 9420, 5970, 4724, 5020, 3726, 540, 1583, 1277, 894, 5139, 6382	2278	42	13528	1.97951	1	0.111507	28.1292
GOTERM_BP_FAT	GO:0045785~positive regulation of cell adhesion	18	0.746269	0.0177977	3673, 6714, 2064, 3084, 7409, 324, 7448, 1021, 6376, 5590, 2246, 7248, 6696, 4088, 3655, 10451, 4092, 7057	2278	60	13528	1.78156	1	0.113856	28.6947
GOTERM_BP_FAT	GO:0008277~regulation of G-protein coupled receptor protein signaling pathway	16	0.66335	0.0179336	10268, 10267, 653238, 10266, 2788, 156, 1906, 155, 2786, 154, 2966, 408, 5338, 1813, 11251, 1814, 2869	2278	51	13528	1.86307	1	0.114521	28.8802
GOTERM_BP_FAT	GO:0051216~cartilage development	21	0.870647	0.018148	1280, 657, 658, 5745, 1432, 1297, 5578, 9241, 3339, 2254, 2690, 2778, 2251, 650, 1906, 7474, 51738, 8817, 2249, 1277, 538	2278	74	13528	1.68526	1	0.115659	29.1721
GOTERM_BP_FAT	GO:0003071~renal system process involved in regulation of systemic arterial blood pressure	5	0.207297	0.018231	2837, 183, 185, 186, 1585	2278	7	13528	4.24182	1	0.115998	29.2847
GOTERM_BP_FAT	GO:0000076~DNA replication checkpoint	5	0.207297	0.018231	81620, 5884, 990, 5883, 8318	2278	7	13528	4.24182	1	0.115998	29.2847
GOTERM_BP_FAT	GO:0032297~negative regulation of DNA replication initiation	5	0.207297	0.018231	81620, 5884, 990, 5883, 8318	2278	7	13528	4.24182	1	0.115998	29.2847
GOTERM_BP_FAT	GO:0010632~regulation of epithelial cell migration	5	0.207297	0.018231	6869, 3673, 6863, 10013, 3091	2278	7	13528	4.24182	1	0.115998	29.2847
GOTERM_BP_FAT	GO:0051489~regulation of filopodium assembly	5	0.207297	0.018231	23433, 5898, 5588, 116985, 7046	2278	7	13528	4.24182	1	0.115998	29.2847
GOTERM_BP_FAT	GO:0003084~positive regulation of systemic arterial blood pressure	5	0.207297	0.018231	147, 183, 552, 1585, 551	2278	7	13528	4.24182	1	0.115998	29.2847
GOTERM_BP_FAT	GO:0051491~positive regulation of filopodium assembly	5	0.207297	0.018231	23433, 5898, 5588, 116985, 7046	2278	7	13528	4.24182	1	0.115998	29.2847
GOTERM_BP_FAT	GO:0006101~citrate metabolic process	5	0.207297	0.018231	1431, 6777, 6776, 2690, 50	2278	7	13528	4.24182	1	0.115998	29.2847
GOTERM_BP_FAT	GO:0051968~positive regulation of synaptic transmission, glutamatergic	5	0.207297	0.018231	135, 1956, 5021, 1812, 4915	2278	7	13528	4.24182	1	0.115998	29.2847
GOTERM_BP_FAT	GO:0048016~inositol phosphate-mediated signaling	5	0.207297	0.018231	1908, 10316, 56923, 1906, 1907	2278	7	13528	4.24182	1	0.115998	29.2847
GOTERM_BP_FAT	GO:0033160~positive regulation of protein import into nucleus, translocation	5	0.207297	0.018231	657, 7040, 4089, 7046, 3717	2278	7	13528	4.24182	1	0.115998	29.2847
GOTERM_BP_FAT	GO:0006998~nuclear envelope organization	5	0.207297	0.018231	81565, 5048, 25777, 2010, 4000	2278	7	13528	4.24182	1	0.115998	29.2847
GOTERM_BP_FAT	GO:0030818~negative regulation of cAMP biosynthetic process	5	0.207297	0.018231	1909, 3351, 2918, 2917, 1906	2278	7	13528	4.24182	1	0.115998	29.2847
GOTERM_BP_FAT	GO:0030147~natriuresis	5	0.207297	0.018231	134, 135, 3827, 1813, 1906	2278	7	13528	4.24182	1	0.115998	29.2847
GOTERM_BP_FAT	GO:0033627~cell adhesion mediated by integrin	5	0.207297	0.018231	3688, 6868, 3678, 3655, 3383	2278	7	13528	4.24182	1	0.115998	29.2847
GOTERM_BP_FAT	GO:0090003~regulation of establishment of protein localization to plasma membrane	5	0.207297	0.018231	23433, 5170, 5584, 207, 5295	2278	7	13528	4.24182	1	0.115998	29.2847
GOTERM_BP_FAT	GO:0030815~negative regulation of cAMP metabolic process	5	0.207297	0.018231	1909, 3351, 2918, 2917, 1906	2278	7	13528	4.24182	1	0.115998	29.2847
GOTERM_BP_FAT	GO:0010873~positive regulation of cholesterol esterification	5	0.207297	0.018231	183, 185, 336, 335, 348	2278	7	13528	4.24182	1	0.115998	29.2847
GOTERM_BP_FAT	GO:0043281~regulation of caspase activity	22	0.912106	0.0189393	135, 842, 2147, 2149, 7013, 1285, 6772, 332, 1029, 10395, 7157, 1032, 54205, 3164, 4088, 4221, 885, 572, 3932, 4609, 999, 4091	2278	79	13528	1.65377	1	0.120097	30.2394
GOTERM_BP_FAT	GO:0009792~embryonic development ending in birth or egg hatching	72	2.98507	0.0193608	154796, 5950, 338, 3640, 3280, 9241, 2254, 7249, 3339, 57534, 10395, 3726, 2648, 8323, 6117, 5159, 1280, 89780, 1856, 7483, 2904, 672, 5704, 3091, 7976, 5702, 1906, 23509, 1909, 28514, 3688, 6608, 8788, 7248, 472, 1277, 4221, 2909, 5125, 4087, 652826, 7471, 2033, 5664, 2768, 10672, 10087, 2068, 7189, 81565, 727, 3516, 7048, 1543, 10018, 7046, 102, 7082, 10733, 2395, 7014, 5156, 92, 91, 9837, 2778…	2278	334	13528	1.28016	1	0.122454	30.8017
GOTERM_BP_FAT	GO:0002764~immune response-regulating signal transduction	17	0.704809	0.0195217	930, 5970, 8767, 5664, 9564, 916, 7189, 10603, 4615, 719, 6850, 919, 2534, 3654, 4792, 4067, 5594	2278	56	13528	1.80277	1	0.123246	31.0152
GOTERM_BP_FAT	GO:0016042~lipid catabolic process	41	1.69983	0.0198071	5330, 10858, 4023, 338, 23236, 2110, 5331, 5332, 5048, 336, 8074, 151056, 222236, 1581, 747, 51302, 221955, 8877, 8879, 283748, 30814, 8399, 5320, 5321, 5322, 344, 125981, 345, 64600, 348, 1594, 1591, 5335, 26279, 81579, 5337, 5338, 1812, 1208, 5406, 5319	2278	173	13528	1.4074	1	0.124776	31.3925
GOTERM_BP_FAT	GO:0046467~membrane lipid biosynthetic process	12	0.497512	0.0198311	55304, 6610, 204219, 166929, 10558, 9517, 253782, 56848, 79603, 91012, 259230, 29956	2278	34	13528	2.09596	1	0.124747	31.4241
GOTERM_BP_FAT	GO:0035249~synaptic transmission, glutamatergic	7	0.290216	0.0199247	135, 1020, 2902, 2918, 2906, 5327, 53358	2278	14	13528	2.96927	1	0.125131	31.5473
GOTERM_BP_FAT	GO:0009651~response to salt stress	7	0.290216	0.0199247	183, 624, 5020, 6870, 553, 7157, 551	2278	14	13528	2.96927	1	0.125131	31.5473
GOTERM_BP_FAT	GO:0051954~positive regulation of amine transport	7	0.290216	0.0199247	135, 3358, 5021, 7200, 1813, 5020, 156	2278	14	13528	2.96927	1	0.125131	31.5473
GOTERM_BP_FAT	GO:0045744~negative regulation of G-protein coupled receptor protein signaling pathway	7	0.290216	0.0199247	2966, 653238, 5338, 1813, 1814, 156, 155, 154	2278	14	13528	2.96927	1	0.125131	31.5473
GOTERM_BP_FAT	GO:0043526~neuroprotection	7	0.290216	0.0199247	2914, 84335, 538, 2690, 2099, 1392, 3717	2278	14	13528	2.96927	1	0.125131	31.5473
GOTERM_BP_FAT	GO:0032410~negative regulation of transporter activity	7	0.290216	0.0199247	2771, 805, 801, 808, 1813, 3643, 1814, 336, 154	2278	14	13528	2.96927	1	0.125131	31.5473
GOTERM_BP_FAT	GO:0007369~gastrulation	20	0.829187	0.0200367	659, 154796, 10818, 89780, 657, 93, 92, 5566, 1738, 2253, 9350, 8613, 7473, 7157, 1499, 5573, 4088, 4089, 4086, 4087	2278	70	13528	1.69673	1	0.125622	31.6944
GOTERM_BP_FAT	GO:0006936~muscle contraction	37	1.534	0.0202	6752, 1910, 5144, 5664, 3827, 5021, 2767, 10087, 156, 9826, 51083, 6869, 5348, 8811, 1131, 6865, 4090, 2010, 624, 148, 817, 10316, 3551, 2775, 1906, 1241, 1907, 1909, 1908, 6198, 2280, 183, 10911, 7433, 1812, 1813, 88	2278	153	13528	1.43612	1	0.126415	31.9084
GOTERM_BP_FAT	GO:0032663~regulation of interleukin-2 production	11	0.456053	0.0208979	51564, 7189, 920, 941, 942, 5588, 940, 6777, 8767, 6776, 916	2278	30	13528	2.17747	1	0.130351	32.8161
GOTERM_BP_FAT	GO:0033044~regulation of chromosome organization	11	0.456053	0.0208979	2067, 7014, 7013, 25913, 2072, 4221, 26277, 65057, 4609, 54386, 9700	2278	30	13528	2.17747	1	0.130351	32.8161
GOTERM_BP_FAT	GO:0051173~positive regulation of nitrogen compound metabolic process	129	5.34826	0.0211669	4208, 4303, 6774, 941, 942, 2149, 3280, 2002, 8928, 3479, 3726, 154, 3480, 3481, 1387, 8878, 51773, 5741, 375790, 5744, 672, 79718, 3091, 1901, 1385, 207, 122042, 3718, 1906, 3717, 348, 728590, 4221, 6777, 1812, 6776, 1814, 6778, 4790, 1816, 4792, 4609, 1432, 5970, 56034, 2071, 10014, 2068, 2069, 7040, 7422, 3320, 4090, 7046, 4093, 10413, 5154, 5155, 890, 5156, 2308, 2309, 9759, 26277, 3014, 6667…	2278	644	13528	1.18955	1	0.131751	33.1629
GOTERM_BP_FAT	GO:0018107~peptidyl-threonine phosphorylation	8	0.331675	0.0216426	5599, 5578, 91, 5170, 7048, 7046, 156, 2475	2278	18	13528	2.63935	1	0.134351	33.7719
GOTERM_BP_FAT	GO:0002062~chondrocyte differentiation	8	0.331675	0.0216426	1280, 8817, 5745, 1432, 1297, 5578, 2254, 3339	2278	18	13528	2.63935	1	0.134351	33.7719
GOTERM_BP_FAT	GO:0033993~response to lipid	8	0.331675	0.0216426	7040, 9525, 1956, 7048, 5020, 7046, 5406, 4087	2278	18	13528	2.63935	1	0.134351	33.7719
GOTERM_BP_FAT	GO:0043408~regulation of MAPKKK cascade	28	1.16086	0.0217679	2914, 2149, 8767, 2254, 8841, 2911, 155, 154, 1499, 3481, 6850, 723961, 3630, 9611, 2064, 2904, 324, 1902, 23566, 207, 1906, 208, 9170, 2549, 183, 8312, 4221, 3643, 121512, 9965	2278	109	13528	1.5255	1	0.1349	33.9316
GOTERM_BP_FAT	GO:0051223~regulation of protein transport	29	1.20232	0.0219909	135, 5950, 9908, 5781, 2932, 336, 1950, 335, 7189, 7040, 3481, 387, 7424, 3630, 723961, 7046, 657, 7529, 5588, 5566, 3717, 1020, 5590, 6608, 4088, 4089, 1813, 1814, 4792, 999, 5319	2278	114	13528	1.51068	1	0.136014	34.2146
GOTERM_BP_FAT	GO:0002429~immune response-activating cell surface receptor signaling pathway	13	0.538972	0.0229038	7189, 10603, 719, 6850, 930, 919, 5664, 8767, 9564, 2534, 916, 4067, 5594	2278	39	13528	1.97951	1	0.141113	35.3615
GOTERM_BP_FAT	GO:0033555~multicellular organismal response to stress	13	0.538972	0.0229038	1910, 5179, 2904, 2917, 2788, 796, 153, 6869, 150, 6863, 1812, 885, 56923	2278	39	13528	1.97951	1	0.141113	35.3615
GOTERM_BP_FAT	GO:0048729~tissue morphogenesis	42	1.74129	0.0234247	1147, 4853, 284217, 4851, 57534, 7476, 7249, 2252, 7473, 10395, 1499, 7189, 8323, 7424, 10468, 538, 4804, 4092, 659, 3714, 89780, 657, 1856, 5566, 7976, 650, 5727, 2719, 7050, 2280, 182, 7248, 183, 5573, 54361, 4088, 1277, 2909, 4089, 1278, 4086, 4087	2278	180	13528	1.38566	1	0.143921	36.0074
GOTERM_BP_FAT	GO:0043583~ear development	25	1.03648	0.023426	1280, 388585, 26281, 3714, 89780, 7471, 8516, 5154, 10253, 5156, 3280, 9241, 2254, 7976, 1027, 1906, 491, 7040, 28514, 182, 2255, 8323, 80184, 10018, 4609	2278	95	13528	1.56277	1	0.143737	36.009
GOTERM_BP_FAT	GO:0046903~secretion	65	2.69486	0.0236243	2914, 3627, 2912, 84634, 2642, 5733, 11255, 338557, 5021, 3827, 5539, 2740, 5020, 6348, 51083, 6352, 6869, 6865, 5584, 4218, 301, 4036, 2617, 5322, 1081, 50617, 1906, 1908, 4160, 1813, 1814, 5125, 56923, 5319, 4087, 134, 135, 10874, 136, 7476, 5045, 5046, 6343, 6344, 6850, 23327, 554, 624, 551, 93, 818, 2778, 2692, 2691, 2693, 51738, 1020, 3973, 183, 2864, 7432, 11069, 4915, 4067, 525	2278	300	13528	1.28668	1	0.144681	36.2532
GOTERM_BP_FAT	GO:0042129~regulation of T cell proliferation	18	0.746269	0.0244282	2064, 941, 5588, 29126, 940, 80380, 8767, 1029, 916, 836, 7412, 7040, 6850, 6777, 8440, 6776, 83737, 4690	2278	62	13528	1.72409	1	0.149075	37.2344
GOTERM_BP_FAT	GO:0033157~regulation of intracellular protein transport	16	0.66335	0.0253269	657, 5781, 9908, 5588, 5566, 2932, 3717, 1020, 7040, 6608, 387, 4088, 4089, 7046, 4792, 999	2278	53	13528	1.79277	1	0.153976	38.3145
GOTERM_BP_FAT	GO:0006606~protein import into nucleus	23	0.953566	0.0254517	2147, 23649, 2149, 7514, 2254, 7249, 5617, 51079, 5532, 207, 7157, 9372, 5530, 3717, 5903, 4928, 9702, 7040, 2255, 2247, 1812, 4792, 5594	2278	86	13528	1.58821	1	0.154477	38.4631
GOTERM_BP_FAT	GO:0052547~regulation of peptidase activity	23	0.953566	0.0254517	135, 842, 2147, 2149, 7013, 1285, 6772, 332, 1029, 5045, 10395, 7157, 1032, 54205, 3164, 4088, 4221, 885, 572, 3932, 4609, 999, 4091	2278	86	13528	1.58821	1	0.154477	38.4631
GOTERM_BP_FAT	GO:0051897~positive regulation of protein kinase B signaling cascade	6	0.248756	0.0254529	3481, 7040, 6453, 3643, 723961, 3630, 7046, 2475	2278	11	13528	3.23921	1	0.15428	38.4645
GOTERM_BP_FAT	GO:0045648~positive regulation of erythrocyte differentiation	6	0.248756	0.0254529	1432, 92, 2309, 91, 3091, 3624	2278	11	13528	3.23921	1	0.15428	38.4645
GOTERM_BP_FAT	GO:0007094~mitotic cell cycle spindle assembly checkpoint	6	0.248756	0.0254529	651610, 7013, 699, 472, 324, 1062, 4085	2278	11	13528	3.23921	1	0.15428	38.4645
GOTERM_BP_FAT	GO:0031663~lipopolysaccharide-mediated signaling pathway	6	0.248756	0.0254529	1432, 6772, 8767, 3654, 4792, 5594	2278	11	13528	3.23921	1	0.15428	38.4645
GOTERM_BP_FAT	GO:0031623~receptor internalization	6	0.248756	0.0254529	409, 2966, 653238, 5338, 2690, 1814, 4734	2278	11	13528	3.23921	1	0.15428	38.4645
GOTERM_BP_FAT	GO:0006929~substrate-bound cell migration	6	0.248756	0.0254529	7060, 506, 5155, 4983, 7424, 22801	2278	11	13528	3.23921	1	0.15428	38.4645
GOTERM_BP_FAT	GO:0048070~regulation of pigmentation during development	6	0.248756	0.0254529	1908, 4254, 653882, 2776, 2767, 3815, 10018	2278	11	13528	3.23921	1	0.15428	38.4645
GOTERM_BP_FAT	GO:0080010~regulation of oxygen and reactive oxygen species metabolic process	6	0.248756	0.0254529	5880, 10013, 3643, 5879, 26574, 7057	2278	11	13528	3.23921	1	0.15428	38.4645
GOTERM_BP_FAT	GO:0045841~negative regulation of mitotic metaphase/anaphase transition	6	0.248756	0.0254529	651610, 7013, 699, 472, 324, 1062, 4085	2278	11	13528	3.23921	1	0.15428	38.4645
GOTERM_BP_FAT	GO:0007320~insemination	6	0.248756	0.0254529	6869, 6863, 92, 5021, 5020, 552	2278	11	13528	3.23921	1	0.15428	38.4645
GOTERM_BP_FAT	GO:0051101~regulation of DNA binding	30	1.24378	0.0273824	805, 2033, 801, 5970, 8767, 1029, 3845, 440577, 3383, 10014, 2068, 4615, 7040, 65057, 51773, 6497, 3654, 4092, 3673, 815, 5744, 5588, 4869, 9759, 3551, 3717, 6608, 183, 4221, 808, 3066, 4792, 5319	2278	121	13528	1.47237	1	0.164888	40.7188
GOTERM_BP_FAT	GO:0045428~regulation of nitric oxide biosynthetic process	10	0.414594	0.0278272	3481, 3320, 1956, 186, 3643, 723961, 3630, 3269, 207, 1906, 3383, 3717	2278	27	13528	2.19946	1	0.167145	41.2274
GOTERM_BP_FAT	GO:0050796~regulation of insulin secretion	13	0.538972	0.0278527	5950, 5140, 5781, 2641, 130399, 3625, 5715, 2693, 3717, 51738, 8622, 7200, 6755	2278	40	13528	1.93003	1	0.167069	41.2564
GOTERM_BP_FAT	GO:0046513~ceramide biosynthetic process	7	0.290216	0.0285739	6610, 166929, 253782, 79603, 91012, 259230, 29956	2278	15	13528	2.77132	1	0.170838	42.0718
GOTERM_BP_FAT	GO:0006509~membrane protein ectodomain proteolysis	7	0.290216	0.0285739	6868, 5588, 55851, 5664, 23385, 102, 51107	2278	15	13528	2.77132	1	0.170838	42.0718
GOTERM_BP_FAT	GO:0007176~regulation of epidermal growth factor receptor activity	7	0.290216	0.0285739	2069, 6868, 6464, 5664, 8440, 1950, 351	2278	15	13528	2.77132	1	0.170838	42.0718
GOTERM_BP_FAT	GO:0007620~copulation	7	0.290216	0.0285739	6869, 6863, 92, 5021, 5020, 552, 551	2278	15	13528	2.77132	1	0.170838	42.0718
GOTERM_BP_FAT	GO:0001893~maternal placenta development	7	0.290216	0.0285739	51738, 1594, 5321, 6696, 682, 2693, 3726	2278	15	13528	2.77132	1	0.170838	42.0718
GOTERM_BP_FAT	GO:0042304~regulation of fatty acid biosynthetic process	7	0.290216	0.0285739	183, 5321, 672, 344, 552, 345, 551	2278	15	13528	2.77132	1	0.170838	42.0718
GOTERM_BP_FAT	GO:0048858~cell projection morphogenesis	54	2.23881	0.0289562	5781, 5578, 4851, 3480, 7852, 885, 538, 886, 5116, 4218, 5747, 2064, 89780, 8399, 2065, 5604, 25937, 1385, 4747, 3717, 7311, 56896, 10371, 6608, 8828, 8829, 728590, 7840, 1813, 5879, 55558, 6285, 135, 5108, 133, 1956, 8650, 5048, 667, 81565, 4983, 4804, 8481, 8997, 65078, 8851, 3672, 658, 324, 1874, 6233, 351, 1020, 6387, 56288	2278	245	13528	1.3089	1	0.17272	42.4995
GOTERM_BP_FAT	GO:0042058~regulation of epidermal growth factor receptor signaling pathway	9	0.373134	0.0289655	2069, 6868, 183, 6464, 5664, 8440, 1950, 6654, 351	2278	23	13528	2.32378	1	0.172549	42.5099
GOTERM_BP_FAT	GO:0002793~positive regulation of peptide secretion	9	0.373134	0.0289655	134, 51738, 5950, 7200, 1813, 2692, 2691, 5715, 3717	2278	23	13528	2.32378	1	0.172549	42.5099
GOTERM_BP_FAT	GO:0045076~regulation of interleukin-2 biosynthetic process	8	0.331675	0.0294051	920, 941, 942, 5588, 940, 6777, 6776, 916	2278	19	13528	2.50044	1	0.174734	42.9981
GOTERM_BP_FAT	GO:0042596~fear response	8	0.331675	0.0294051	153, 150, 5179, 2904, 2917, 2788, 1812, 885	2278	19	13528	2.50044	1	0.174734	42.9981
GOTERM_BP_FAT	GO:0045168~cell-cell signaling involved in cell fate specification	8	0.331675	0.0294051	10818, 2248, 2255, 2246, 10252, 2247, 2264, 7473	2278	19	13528	2.50044	1	0.174734	42.9981
GOTERM_BP_FAT	GO:0045445~myoblast differentiation	8	0.331675	0.0294051	182, 6300, 3479, 6382, 5925, 2251, 5340, 1499	2278	19	13528	2.50044	1	0.174734	42.9981
GOTERM_BP_FAT	GO:0031128~developmental induction	8	0.331675	0.0294051	10818, 2248, 2255, 2246, 10252, 2247, 2264, 7473	2278	19	13528	2.50044	1	0.174734	42.9981
GOTERM_BP_FAT	GO:0001776~leukocyte homeostasis	12	0.497512	0.030242	10603, 7040, 9133, 6777, 4221, 6776, 3551, 10018, 338442, 5532, 207, 8843, 836	2278	36	13528	1.97951	1	0.179072	43.9166
GOTERM_BP_FAT	GO:0048565~gut development	12	0.497512	0.030242	1910, 1281, 7040, 2255, 93, 4851, 2254, 5021, 1543, 7046, 5125, 1499	2278	36	13528	1.97951	1	0.179072	43.9166
GOTERM_BP_FAT	GO:0009749~response to glucose stimulus	14	0.580431	0.0305782	1292, 5728, 93, 5588, 1285, 2752, 130399, 336, 7040, 6198, 7200, 7048, 7057, 4087	2278	45	13528	1.84755	1	0.180667	44.2817
GOTERM_BP_FAT	GO:0007389~pattern specification process	58	2.40464	0.0308225	10818, 4855, 4853, 3280, 9241, 4851, 8928, 57534, 2648, 5986, 7852, 65057, 89780, 1856, 2321, 9350, 1906, 23509, 1909, 28514, 6608, 3955, 1592, 2255, 8829, 8312, 472, 340665, 4089, 4086, 5125, 56603, 4087, 7471, 2033, 5664, 7476, 10672, 7473, 1499, 3516, 7422, 4090, 10468, 7048, 7046, 4091, 659, 657, 658, 93, 92, 324, 5727, 7050, 6387, 1399, 651610, 4242	2278	267	13528	1.29002	1	0.181759	44.5456
GOTERM_BP_FAT	GO:0043009~chordate embryonic development	70	2.90216	0.0310598	154796, 5950, 338, 3640, 3280, 9241, 2254, 7249, 3339, 57534, 10395, 3726, 2648, 8323, 6117, 5159, 1280, 89780, 1856, 7483, 2904, 672, 5704, 3091, 7976, 5702, 1906, 23509, 1909, 28514, 3688, 6608, 8788, 7248, 472, 1277, 4221, 2909, 5125, 4087, 652826, 7471, 2033, 5664, 2768, 10672, 10087, 2068, 7189, 81565, 727, 3516, 7048, 10018, 7046, 102, 7082, 10733, 7014, 5156, 92, 91, 9837, 2778, 6667, 5727…	2278	331	13528	1.25589	1	0.182809	44.8007
GOTERM_BP_FAT	GO:0030803~negative regulation of cyclic nucleotide biosynthetic process	5	0.207297	0.0316567	1909, 3351, 2918, 2917, 1906	2278	8	13528	3.71159	1	0.185788	45.4376
GOTERM_BP_FAT	GO:0060123~regulation of growth hormone secretion	5	0.207297	0.0316567	51738, 5781, 1813, 2692, 2691	2278	8	13528	3.71159	1	0.185788	45.4376
GOTERM_BP_FAT	GO:0010714~positive regulation of collagen metabolic process	5	0.207297	0.0316567	3673, 7040, 2147, 2149, 3066	2278	8	13528	3.71159	1	0.185788	45.4376
GOTERM_BP_FAT	GO:0048011~nerve growth factor receptor signaling pathway	5	0.207297	0.0316567	6714, 5781, 5894, 9564, 6654	2278	8	13528	3.71159	1	0.185788	45.4376
GOTERM_BP_FAT	GO:0031998~regulation of fatty acid beta-oxidation	5	0.207297	0.0316567	3667, 8660, 207, 208, 2475	2278	8	13528	3.71159	1	0.185788	45.4376
GOTERM_BP_FAT	GO:0042756~drinking behavior	5	0.207297	0.0316567	3351, 183, 11255, 5020, 5367	2278	8	13528	3.71159	1	0.185788	45.4376
GOTERM_BP_FAT	GO:0010872~regulation of cholesterol esterification	5	0.207297	0.0316567	183, 185, 336, 335, 348	2278	8	13528	3.71159	1	0.185788	45.4376
GOTERM_BP_FAT	GO:0032095~regulation of response to food	5	0.207297	0.0316567	51738, 4852, 885, 2693, 2475	2278	8	13528	3.71159	1	0.185788	45.4376
GOTERM_BP_FAT	GO:0030252~growth hormone secretion	5	0.207297	0.0316567	51738, 2692, 2691, 51083, 2693	2278	8	13528	3.71159	1	0.185788	45.4376
GOTERM_BP_FAT	GO:0032413~negative regulation of ion transmembrane transporter activity	5	0.207297	0.0316567	2771, 805, 801, 808, 1813, 1814, 154	2278	8	13528	3.71159	1	0.185788	45.4376
GOTERM_BP_FAT	GO:0030809~negative regulation of nucleotide biosynthetic process	5	0.207297	0.0316567	1909, 3351, 2918, 2917, 1906	2278	8	13528	3.71159	1	0.185788	45.4376
GOTERM_BP_FAT	GO:0032967~positive regulation of collagen biosynthetic process	5	0.207297	0.0316567	3673, 7040, 2147, 2149, 3066	2278	8	13528	3.71159	1	0.185788	45.4376
GOTERM_BP_FAT	GO:0030800~negative regulation of cyclic nucleotide metabolic process	5	0.207297	0.0316567	1909, 3351, 2918, 2917, 1906	2278	8	13528	3.71159	1	0.185788	45.4376
GOTERM_BP_FAT	GO:0040015~negative regulation of multicellular organism growth	5	0.207297	0.0316567	153, 2395, 5727, 155, 154	2278	8	13528	3.71159	1	0.185788	45.4376
GOTERM_BP_FAT	GO:0010256~endomembrane organization	5	0.207297	0.0316567	81565, 5048, 25777, 2010, 4000	2278	8	13528	3.71159	1	0.185788	45.4376
GOTERM_BP_FAT	GO:0050670~regulation of lymphocyte proliferation	22	0.912106	0.0319945	2064, 941, 5588, 29126, 940, 80380, 8767, 1029, 916, 1026, 836, 51083, 7412, 7040, 6869, 6863, 6850, 8440, 6777, 6776, 83737, 4690	2278	83	13528	1.57407	1	0.187363	45.7949
GOTERM_BP_FAT	GO:0051170~nuclear import	23	0.953566	0.0325154	2147, 23649, 2149, 7514, 2254, 7249, 5617, 51079, 5532, 207, 7157, 9372, 5530, 3717, 5903, 4928, 9702, 7040, 2255, 2247, 1812, 4792, 5594	2278	88	13528	1.55212	1	0.189909	46.3417
GOTERM_BP_FAT	GO:0021954~central nervous system neuron development	11	0.456053	0.0326776	1020, 81565, 5747, 5578, 1812, 84894, 2776, 5048, 1813, 538, 55558	2278	32	13528	2.04137	1	0.190533	46.5108
GOTERM_BP_FAT	GO:0001936~regulation of endothelial cell proliferation	11	0.456053	0.0326776	51738, 7422, 5155, 3091, 6347, 7472, 498, 7057, 57804, 2475, 348	2278	32	13528	2.04137	1	0.190533	46.5108
GOTERM_BP_FAT	GO:0030168~platelet activation	11	0.456053	0.0326776	5291, 1281, 2147, 64805, 2149, 2244, 7450, 5196, 2266, 10672, 2243	2278	32	13528	2.04137	1	0.190533	46.5108
GOTERM_BP_FAT	GO:0015718~monocarboxylic acid transport	15	0.621891	0.0328693	84634, 301, 5322, 1109, 23539, 9123, 5205, 3973, 1813, 6566, 1814, 1645, 624, 56923, 5319	2278	50	13528	1.78156	1	0.191312	46.7101
GOTERM_BP_FAT	GO:0032102~negative regulation of response to external stimulus	15	0.621891	0.0328693	134, 135, 2902, 10203, 2475, 154, 2693, 348, 51738, 3481, 6696, 1812, 885, 1813, 1814, 3630, 723961	2278	50	13528	1.78156	1	0.191312	46.7101
GOTERM_BP_FAT	GO:0030098~lymphocyte differentiation	26	1.07794	0.0334181	920, 940, 1499, 10014, 7253, 3676, 7040, 6868, 6850, 538, 3714, 9734, 9759, 915, 324, 916, 5532, 7157, 7412, 3688, 6777, 6776, 399, 5295, 3932, 4914	2278	103	13528	1.49905	1	0.193979	47.2767
GOTERM_BP_FAT	GO:0051092~positive regulation of NF-kappaB transcription factor activity	13	0.538972	0.0335324	815, 5588, 4869, 5970, 8767, 3845, 3551, 440577, 3383, 4615, 7040, 183, 3654, 5319	2278	41	13528	1.88295	1	0.19434	47.394
GOTERM_BP_FAT	GO:0001570~vasculogenesis	13	0.538972	0.0335324	154796, 5747, 6608, 7422, 10352, 3791, 23462, 7048, 8879, 4915, 23493, 3726, 5921	2278	41	13528	1.88295	1	0.19434	47.394
GOTERM_BP_FAT	GO:0033554~cellular response to stress	113	4.68491	0.0338344	55437, 4303, 9459, 7298, 487, 8525, 538, 10714, 65057, 672, 3091, 23645, 3717, 6608, 114799, 27327, 545, 472, 4221, 8243, 1453, 1432, 6300, 1454, 84126, 2072, 2071, 2073, 10087, 57804, 2068, 10013, 5422, 157570, 1643, 9978, 1642, 5427, 595, 648152, 890, 5424, 4176, 5425, 2309, 5426, 1111, 80254, 324, 3014, 9232, 2966, 2965, 1399, 651610, 5810, 121512, 7057, 2968, 2967, 63967, 842, 5781, 1763, 983…	2278	566	13528	1.18561	1	0.195689	47.7028
GOTERM_BP_FAT	GO:0051592~response to calcium ion	16	0.66335	0.0347792	595, 4331, 805, 5321, 1956, 2033, 3710, 801, 2266, 4734, 846, 2243, 7252, 2244, 808, 6382, 7057, 728294	2278	55	13528	1.72758	1	0.200402	48.6575
GOTERM_BP_FAT	GO:0002260~lymphocyte homeostasis	10	0.414594	0.0350614	10603, 7040, 9133, 6777, 6776, 3551, 10018, 5532, 207, 836	2278	28	13528	2.12091	1	0.201628	48.9394
GOTERM_BP_FAT	GO:0019748~secondary metabolic process	21	0.870647	0.0355417	5950, 3420, 6121, 1743, 2819, 4191, 145226, 9227, 51109, 9249, 6888, 1592, 3419, 340665, 5947, 1543, 1544, 1545, 3421, 3945, 56603	2278	79	13528	1.5786	1	0.203879	49.416
GOTERM_BP_FAT	GO:0048839~inner ear development	21	0.870647	0.0355417	26281, 388585, 1280, 89780, 3714, 8516, 5154, 7471, 10253, 5156, 3280, 2254, 7976, 1027, 491, 28514, 7040, 182, 8323, 2255, 80184	2278	79	13528	1.5786	1	0.203879	49.416
GOTERM_BP_FAT	GO:0032944~regulation of mononuclear cell proliferation	22	0.912106	0.0361176	2064, 941, 5588, 29126, 940, 80380, 8767, 1029, 916, 1026, 836, 51083, 7412, 7040, 6869, 6863, 6850, 8440, 6777, 6776, 83737, 4690	2278	84	13528	1.55533	1	0.206614	49.9818
GOTERM_BP_FAT	GO:0070663~regulation of leukocyte proliferation	22	0.912106	0.0361176	2064, 941, 5588, 29126, 940, 80380, 8767, 1029, 916, 1026, 836, 51083, 7412, 7040, 6869, 6863, 6850, 8440, 6777, 6776, 83737, 4690	2278	84	13528	1.55533	1	0.206614	49.9818
GOTERM_BP_FAT	GO:0009743~response to carbohydrate stimulus	17	0.704809	0.036357	1292, 5728, 338, 93, 5588, 1285, 130399, 2752, 5020, 336, 7040, 6198, 7200, 7048, 4067, 7057, 4087	2278	60	13528	1.68259	1	0.207597	50.2152
GOTERM_BP_FAT	GO:0051091~positive regulation of transcription factor activity	17	0.704809	0.036357	815, 5588, 2033, 4869, 5970, 8767, 9759, 3845, 3551, 440577, 3717, 3383, 10014, 4615, 7040, 183, 3654, 5319	2278	60	13528	1.68259	1	0.207597	50.2152
GOTERM_BP_FAT	GO:0050919~negative chemotaxis	4	0.165837	0.036428	10371, 5154, 8828, 55558	2278	5	13528	4.75083	1	0.207707	50.2842
GOTERM_BP_FAT	GO:0009136~purine nucleoside diphosphate biosynthetic process	4	0.165837	0.036428	513, 506, 498, 514	2278	5	13528	4.75083	1	0.207707	50.2842
GOTERM_BP_FAT	GO:0002024~diet induced thermogenesis	4	0.165837	0.036428	153, 4160, 155, 154	2278	5	13528	4.75083	1	0.207707	50.2842
GOTERM_BP_FAT	GO:0032801~receptor catabolic process	4	0.165837	0.036428	1020, 7040, 57154, 4734	2278	5	13528	4.75083	1	0.207707	50.2842
GOTERM_BP_FAT	GO:0006102~isocitrate metabolic process	4	0.165837	0.036428	3420, 3419, 3418, 3421	2278	5	13528	4.75083	1	0.207707	50.2842
GOTERM_BP_FAT	GO:0000089~mitotic metaphase	4	0.165837	0.036428	55143, 8379, 1062, 26271	2278	5	13528	4.75083	1	0.207707	50.2842
GOTERM_BP_FAT	GO:0032106~positive regulation of response to extracellular stimulus	4	0.165837	0.036428	51738, 1594, 4852, 2693	2278	5	13528	4.75083	1	0.207707	50.2842
GOTERM_BP_FAT	GO:0009180~purine ribonucleoside diphosphate biosynthetic process	4	0.165837	0.036428	513, 506, 498, 514	2278	5	13528	4.75083	1	0.207707	50.2842
GOTERM_BP_FAT	GO:0008628~induction of apoptosis by hormones	4	0.165837	0.036428	6753, 6750, 5741, 1392	2278	5	13528	4.75083	1	0.207707	50.2842
GOTERM_BP_FAT	GO:0007210~serotonin receptor signaling pathway	4	0.165837	0.036428	3356, 3358, 3350, 3363	2278	5	13528	4.75083	1	0.207707	50.2842
GOTERM_BP_FAT	GO:0032232~negative regulation of actin filament bundle formation	4	0.165837	0.036428	395, 116985, 1901, 10395	2278	5	13528	4.75083	1	0.207707	50.2842
GOTERM_BP_FAT	GO:0035081~induction of programmed cell death by hormones	4	0.165837	0.036428	6753, 6750, 5741, 1392	2278	5	13528	4.75083	1	0.207707	50.2842
GOTERM_BP_FAT	GO:0010901~regulation of very-low-density lipoprotein particle remodeling	4	0.165837	0.036428	344, 336, 345, 335	2278	5	13528	4.75083	1	0.207707	50.2842
GOTERM_BP_FAT	GO:0010830~regulation of myotube differentiation	4	0.165837	0.036428	10014, 3065, 9759, 8841	2278	5	13528	4.75083	1	0.207707	50.2842
GOTERM_BP_FAT	GO:0008090~retrograde axon cargo transport	4	0.165837	0.036428	81565, 5048, 4747, 667	2278	5	13528	4.75083	1	0.207707	50.2842
GOTERM_BP_FAT	GO:0006704~glucocorticoid biosynthetic process	4	0.165837	0.036428	1586, 1392, 1585, 1584	2278	5	13528	4.75083	1	0.207707	50.2842
GOTERM_BP_FAT	GO:0010832~negative regulation of myotube differentiation	4	0.165837	0.036428	10014, 3065, 9759, 8841	2278	5	13528	4.75083	1	0.207707	50.2842
GOTERM_BP_FAT	GO:0050917~sensory perception of umami taste	4	0.165837	0.036428	83756, 80835, 3710, 2779	2278	5	13528	4.75083	1	0.207707	50.2842
GOTERM_BP_FAT	GO:0006172~ADP biosynthetic process	4	0.165837	0.036428	513, 506, 498, 514	2278	5	13528	4.75083	1	0.207707	50.2842
GOTERM_BP_FAT	GO:0032109~positive regulation of response to nutrient levels	4	0.165837	0.036428	51738, 1594, 4852, 2693	2278	5	13528	4.75083	1	0.207707	50.2842
GOTERM_BP_FAT	GO:0051898~negative regulation of protein kinase B signaling cascade	4	0.165837	0.036428	5728, 7249, 1813, 1814	2278	5	13528	4.75083	1	0.207707	50.2842
GOTERM_BP_FAT	GO:0006999~nuclear pore organization	4	0.165837	0.036428	4928, 25909, 55746, 81929	2278	5	13528	4.75083	1	0.207707	50.2842
GOTERM_BP_FAT	GO:0001696~gastric acid secretion	4	0.165837	0.036428	51738, 10874, 5021, 5020	2278	5	13528	4.75083	1	0.207707	50.2842
GOTERM_BP_FAT	GO:0009188~ribonucleoside diphosphate biosynthetic process	4	0.165837	0.036428	513, 506, 498, 514	2278	5	13528	4.75083	1	0.207707	50.2842
GOTERM_BP_FAT	GO:0032429~regulation of phospholipase A2 activity	4	0.165837	0.036428	185, 1956, 56923, 5319	2278	5	13528	4.75083	1	0.207707	50.2842
GOTERM_BP_FAT	GO:0018106~peptidyl-histidine phosphorylation	4	0.165837	0.036428	5166, 5164, 5165, 5163	2278	5	13528	4.75083	1	0.207707	50.2842
GOTERM_BP_FAT	GO:0032430~positive regulation of phospholipase A2 activity	4	0.165837	0.036428	185, 1956, 56923, 5319	2278	5	13528	4.75083	1	0.207707	50.2842
GOTERM_BP_FAT	GO:0007064~mitotic sister chromatid cohesion	4	0.165837	0.036428	8243, 25836, 23383, 23047	2278	5	13528	4.75083	1	0.207707	50.2842
GOTERM_BP_FAT	GO:0060045~positive regulation of cardiac muscle cell proliferation	4	0.165837	0.036428	2247, 3084, 2254, 23493	2278	5	13528	4.75083	1	0.207707	50.2842
GOTERM_BP_FAT	GO:0032202~telomere assembly	4	0.165837	0.036428	7015, 25913, 26277, 65057	2278	5	13528	4.75083	1	0.207707	50.2842
GOTERM_BP_FAT	GO:0090004~positive regulation of establishment of protein localization to plasma membrane	4	0.165837	0.036428	5170, 5584, 207, 5295	2278	5	13528	4.75083	1	0.207707	50.2842
GOTERM_BP_FAT	GO:0008610~lipid biosynthetic process	68	2.81924	0.0364573	2252, 253782, 336, 57678, 1392, 50700, 335, 79888, 1583, 123099, 2247, 653924, 8526, 5740, 79603, 51422, 29956, 5321, 6610, 672, 5322, 1589, 1588, 53632, 1586, 1906, 1585, 1584, 1907, 1594, 204219, 56894, 56895, 55326, 5319, 4023, 133, 5618, 166929, 4706, 1595, 56848, 2232, 91012, 51302, 5565, 6850, 5564, 253558, 5563, 5562, 84803, 1543, 254531, 259230, 137964, 55304, 9420, 8560, 2488, 3972, 5571…	2278	323	13528	1.25022	1	0.207603	50.3127
GOTERM_BP_FAT	GO:0048598~embryonic morphogenesis	65	2.69486	0.0366368	154796, 5950, 10818, 4853, 3280, 9241, 4851, 2254, 3339, 57534, 7249, 2253, 10395, 2249, 8323, 80184, 65057, 6497, 1280, 89780, 3714, 7483, 1856, 7976, 9350, 1906, 7248, 2255, 54361, 4088, 4221, 2909, 4089, 4086, 4609, 4087, 56603, 7471, 8516, 5664, 2768, 7476, 7473, 8613, 7474, 1499, 7189, 7424, 7048, 7046, 659, 657, 10253, 93, 92, 1738, 5566, 2776, 2778, 6667, 5727, 7157, 491, 7050, 5573	2278	307	13528	1.25735	1	0.208272	50.4867
GOTERM_BP_FAT	GO:0001667~ameboidal cell migration	12	0.497512	0.0366957	154796, 1908, 1910, 6387, 6608, 4254, 8828, 3091, 7852, 9350, 8879, 9965	2278	37	13528	1.92601	1	0.20832	50.5437
GOTERM_BP_FAT	GO:0042461~photoreceptor cell development	9	0.373134	0.0372199	2780, 6121, 2792, 7422, 80184, 7840, 2779, 5584, 4915	2278	24	13528	2.22695	1	0.21075	51.0481
GOTERM_BP_FAT	GO:0045932~negative regulation of muscle contraction	6	0.248756	0.0377065	136, 487, 796, 477, 156, 154	2278	12	13528	2.96927	1	0.212976	51.512
GOTERM_BP_FAT	GO:0051784~negative regulation of nuclear division	6	0.248756	0.0377065	651610, 7013, 699, 472, 324, 1062, 4085	2278	12	13528	2.96927	1	0.212976	51.512
GOTERM_BP_FAT	GO:0014823~response to activity	6	0.248756	0.0377065	3673, 183, 3643, 6347, 5020, 7384	2278	12	13528	2.96927	1	0.212976	51.512
GOTERM_BP_FAT	GO:0030838~positive regulation of actin filament polymerization	6	0.248756	0.0377065	64223, 8440, 253260, 5879, 2475, 4690	2278	12	13528	2.96927	1	0.212976	51.512
GOTERM_BP_FAT	GO:0051926~negative regulation of calcium ion transport	6	0.248756	0.0377065	2771, 7040, 1813, 796, 2775, 154	2278	12	13528	2.96927	1	0.212976	51.512
GOTERM_BP_FAT	GO:0001958~endochondral ossification	6	0.248756	0.0377065	1280, 8817, 5744, 3339, 1277, 2778	2278	12	13528	2.96927	1	0.212976	51.512
GOTERM_BP_FAT	GO:0007096~regulation of exit from mitosis	6	0.248756	0.0377065	9183, 7040, 8697, 11065, 332, 9735	2278	12	13528	2.96927	1	0.212976	51.512
GOTERM_BP_FAT	GO:0045839~negative regulation of mitosis	6	0.248756	0.0377065	651610, 7013, 699, 472, 324, 1062, 4085	2278	12	13528	2.96927	1	0.212976	51.512
GOTERM_BP_FAT	GO:0033559~unsaturated fatty acid metabolic process	15	0.621891	0.0385207	11283, 8399, 6850, 5321, 5322, 8644, 6916, 8560, 5740, 4051, 8529, 1573, 1906, 5319, 1907	2278	51	13528	1.74663	1	0.216853	52.2788
GOTERM_BP_FAT	GO:0001817~regulation of cytokine production	41	1.69983	0.0387788	920, 941, 942, 2149, 136, 940, 5970, 8767, 54106, 5045, 3625, 336, 3624, 335, 7189, 4615, 2069, 3481, 7040, 6868, 6850, 723961, 3630, 51564, 5588, 3091, 5196, 916, 796, 1385, 1903, 2693, 3717, 51738, 183, 10554, 10555, 4088, 6777, 6776, 4089, 4790, 7057	2278	181	13528	1.34519	1	0.217896	52.5194
GOTERM_BP_FAT	GO:0031330~negative regulation of cellular catabolic process	8	0.331675	0.0388439	3481, 147, 9759, 5045, 723961, 3630, 2931, 345, 207, 2475	2278	20	13528	2.37542	1	0.217962	52.58
GOTERM_BP_FAT	GO:0042462~eye photoreceptor cell development	8	0.331675	0.0388439	2780, 2792, 7422, 80184, 7840, 2779, 5584, 4915	2278	20	13528	2.37542	1	0.217962	52.58
GOTERM_BP_FAT	GO:0060349~bone morphogenesis	8	0.331675	0.0388439	1280, 8817, 7040, 5744, 3339, 1277, 2690, 2778	2278	20	13528	2.37542	1	0.217962	52.58
GOTERM_BP_FAT	GO:0060350~endochondral bone morphogenesis	7	0.290216	0.0393674	1280, 8817, 5744, 3339, 1277, 2690, 2778	2278	16	13528	2.59811	1	0.220335	53.0641
GOTERM_BP_FAT	GO:0034381~lipoprotein particle clearance	7	0.290216	0.0393674	3949, 338, 344, 336, 345, 335, 348	2278	16	13528	2.59811	1	0.220335	53.0641
GOTERM_BP_FAT	GO:0051148~negative regulation of muscle cell differentiation	7	0.290216	0.0393674	10014, 2069, 4303, 4851, 3065, 9759, 8841	2278	16	13528	2.59811	1	0.220335	53.0641
GOTERM_BP_FAT	GO:0017144~drug metabolic process	7	0.290216	0.0393674	1571, 1559, 1557, 1543, 1544, 1576, 1565	2278	16	13528	2.59811	1	0.220335	53.0641
GOTERM_BP_FAT	GO:0007172~signal complex assembly	7	0.290216	0.0393674	1020, 6714, 5747, 375790, 8440, 916, 4690	2278	16	13528	2.59811	1	0.220335	53.0641
GOTERM_BP_FAT	GO:0007405~neuroblast proliferation	7	0.290216	0.0393674	10818, 89780, 29127, 54820, 8326, 8650, 5048	2278	16	13528	2.59811	1	0.220335	53.0641
GOTERM_BP_FAT	GO:0015674~di-, tri-valent inorganic cation transport	40	1.65837	0.0393747	2147, 5579, 2149, 4852, 3708, 3709, 487, 5664, 489, 488, 57113, 10800, 2902, 2903, 1447, 2904, 815, 816, 817, 3710, 818, 27032, 9914, 10316, 5532, 5530, 491, 1594, 492, 493, 2280, 2829, 490, 7225, 2534, 1813, 81894, 7222, 3932, 56923	2278	176	13528	1.34967	1	0.220107	53.0708
GOTERM_BP_FAT	GO:0006766~vitamin metabolic process	20	0.829187	0.0395106	5950, 6121, 6017, 4036, 145226, 9227, 51109, 8074, 1576, 9249, 1594, 1591, 1583, 1592, 340665, 5948, 120227, 5947, 1543, 56603	2278	75	13528	1.58361	1	0.220524	53.1956
GOTERM_BP_FAT	GO:0006090~pyruvate metabolic process	13	0.538972	0.0399912	5950, 682, 5162, 2819, 1738, 5160, 1737, 23539, 8050, 9123, 3939, 6566, 3945	2278	42	13528	1.83812	1	0.222664	53.6347
GOTERM_BP_FAT	GO:0002768~immune response-regulating cell surface receptor signaling pathway	13	0.538972	0.0399912	7189, 10603, 719, 6850, 930, 919, 5664, 8767, 9564, 2534, 916, 4067, 5594	2278	42	13528	1.83812	1	0.222664	53.6347
GOTERM_BP_FAT	GO:0051928~positive regulation of calcium ion transport	11	0.456053	0.0400367	491, 1909, 2147, 3060, 3973, 623, 2149, 2847, 1812, 23566, 5319	2278	33	13528	1.97951	1	0.222625	53.6761
GOTERM_BP_FAT	GO:0001709~cell fate determination	11	0.456053	0.0400367	388585, 3714, 28514, 7471, 182, 4855, 4853, 3280, 998, 1499, 56603	2278	33	13528	1.97951	1	0.222625	53.6761
GOTERM_BP_FAT	GO:0031047~gene silencing by RNA	11	0.456053	0.0400367	192669, 4343, 27161, 57690, 26523, 27327, 4088, 192670, 4086, 23112, 4087	2278	33	13528	1.97951	1	0.222625	53.6761
GOTERM_BP_FAT	GO:0048812~neuron projection morphogenesis	47	1.94859	0.0406105	6285, 135, 133, 5781, 1956, 5578, 4851, 8650, 5048, 667, 81565, 3480, 4983, 885, 7852, 538, 4804, 886, 8997, 65078, 8851, 2064, 5747, 89780, 3672, 8399, 658, 2065, 5604, 324, 1385, 6233, 4747, 351, 3717, 7311, 56896, 1020, 6387, 10371, 6608, 8828, 8829, 728590, 1813, 56288, 5879, 55558	2278	213	13528	1.31038	1	0.225216	54.1948
GOTERM_BP_FAT	GO:0006694~steroid biosynthetic process	22	0.912106	0.0406211	133, 5618, 9420, 1595, 1589, 2488, 1588, 2232, 1586, 1392, 50700, 1585, 335, 1584, 3972, 1594, 51302, 1583, 2247, 5563, 5562, 51422	2278	85	13528	1.53703	1	0.225	54.2044
GOTERM_BP_FAT	GO:0006968~cellular defense response	17	0.704809	0.041848	135, 50852, 10312, 136, 930, 5970, 1232, 4283, 6352, 728, 1234, 3688, 1235, 1524, 10803, 729230, 3579	2278	61	13528	1.655	1	0.230798	55.2948
GOTERM_BP_FAT	GO:0032990~cell part morphogenesis	55	2.28027	0.0424593	5781, 5578, 4851, 3480, 7852, 885, 538, 886, 5116, 4218, 5747, 2064, 89780, 8399, 2065, 5604, 25937, 1385, 4747, 3717, 7311, 56896, 10371, 6608, 8828, 8829, 728590, 7840, 1813, 5879, 55558, 6285, 135, 5108, 133, 1956, 8650, 5048, 10087, 667, 81565, 4983, 4804, 8481, 8997, 65078, 8851, 3672, 658, 324, 1874, 6233, 351, 1020, 6387, 56288	2278	256	13528	1.27586	1	0.233529	55.8289
GOTERM_BP_FAT	GO:0034284~response to monosaccharide stimulus	14	0.580431	0.0426714	1292, 5728, 93, 5588, 1285, 2752, 130399, 336, 7040, 6198, 7200, 7048, 7057, 4087	2278	47	13528	1.76893	1	0.234293	56.0128
GOTERM_BP_FAT	GO:0009746~response to hexose stimulus	14	0.580431	0.0426714	1292, 5728, 93, 5588, 1285, 2752, 130399, 336, 7040, 6198, 7200, 7048, 7057, 4087	2278	47	13528	1.76893	1	0.234293	56.0128
GOTERM_BP_FAT	GO:0006690~icosanoid metabolic process	14	0.580431	0.0426714	11283, 8399, 6850, 5321, 5322, 8644, 6916, 5740, 4051, 8529, 1573, 1906, 5319, 1907	2278	47	13528	1.76893	1	0.234293	56.0128
GOTERM_BP_FAT	GO:0010522~regulation of calcium ion transport into cytosol	10	0.414594	0.0434878	1909, 7040, 805, 2147, 3973, 623, 801, 1812, 808, 796, 4067, 5319	2278	29	13528	2.04777	1	0.238001	56.7139
GOTERM_BP_FAT	GO:0015758~glucose transport	10	0.414594	0.0434878	1909, 3481, 2688, 5473, 7525, 1812, 723961, 3630, 53632, 207, 1906, 5319	2278	29	13528	2.04777	1	0.238001	56.7139
GOTERM_BP_FAT	GO:0018105~peptidyl-serine phosphorylation	10	0.414594	0.0434878	1020, 5590, 6789, 5578, 2932, 5566, 7048, 7046, 156, 207	2278	29	13528	2.04777	1	0.238001	56.7139
GOTERM_BP_FAT	GO:0010970~microtubule-based transport	10	0.414594	0.0434878	81565, 5590, 54820, 5604, 55288, 5048, 89941, 4747, 351, 667	2278	29	13528	2.04777	1	0.238001	56.7139
GOTERM_BP_FAT	GO:0043393~regulation of protein binding	10	0.414594	0.0434878	10014, 651921, 2280, 3673, 648152, 3084, 545, 9241, 9759, 155, 5580, 154	2278	29	13528	2.04777	1	0.238001	56.7139
GOTERM_BP_FAT	GO:0032386~regulation of intracellular transport	19	0.787728	0.0439575	657, 805, 5781, 9908, 5588, 801, 2932, 5566, 1029, 4734, 3717, 1020, 7040, 6608, 387, 4088, 808, 4089, 7046, 4792, 999	2278	71	13528	1.58919	1	0.240005	57.1125
GOTERM_BP_FAT	GO:0048477~oogenesis	12	0.497512	0.0440542	2067, 2069, 994, 658, 9985, 8312, 2309, 54361, 5139, 891, 26271, 122042	2278	38	13528	1.87533	1	0.240193	57.1941
GOTERM_BP_FAT	GO:0045767~regulation of anti-apoptosis	12	0.497512	0.0440542	2066, 57142, 133, 940, 4035, 5562, 4889, 1026, 4086, 4092, 5296, 5921	2278	38	13528	1.87533	1	0.240193	57.1941
GOTERM_BP_FAT	GO:0008584~male gonad development	15	0.621891	0.0448319	595, 3972, 2067, 5950, 3714, 3973, 3640, 92, 54361, 2254, 6382, 5568, 2488, 10018, 122042	2278	52	13528	1.71304	1	0.243669	57.8452
GOTERM_BP_FAT	GO:0006897~endocytosis	48	1.99005	0.0457781	134, 135, 10268, 3265, 10266, 1742, 92737, 7249, 3845, 1785, 4734, 30011, 51606, 155, 154, 3949, 58513, 4983, 7804, 9322, 7048, 506, 29967, 6453, 653238, 26052, 4036, 4035, 6456, 7409, 2690, 1759, 9372, 351, 348, 161, 409, 2966, 1020, 3685, 4893, 160, 5338, 58191, 1814, 26020, 5879, 29924, 7057	2278	220	13528	1.29568	1	0.247932	58.6248
GOTERM_BP_FAT	GO:0010324~membrane invagination	48	1.99005	0.0457781	134, 135, 10268, 3265, 10266, 1742, 92737, 7249, 3845, 1785, 4734, 30011, 51606, 155, 154, 3949, 58513, 4983, 7804, 9322, 7048, 506, 29967, 6453, 653238, 26052, 4036, 4035, 6456, 7409, 2690, 1759, 9372, 351, 348, 161, 409, 2966, 1020, 3685, 4893, 160, 5338, 58191, 1814, 26020, 5879, 29924, 7057	2278	220	13528	1.29568	1	0.247932	58.6248
GOTERM_BP_FAT	GO:0007398~ectoderm development	44	1.82421	0.0460865	1290, 57154, 5970, 4851, 5664, 7476, 1029, 2071, 2252, 3861, 3909, 488, 1499, 2068, 2069, 8643, 5948, 1289, 10468, 538, 4804, 7251, 657, 1281, 5154, 1308, 301, 5744, 5604, 91, 27032, 324, 3852, 5727, 207, 836, 3918, 8174, 182, 2255, 3914, 50509, 1277, 1278	2278	199	13528	1.31304	1	0.24912	58.8758
GOTERM_BP_FAT	GO:0019827~stem cell maintenance	9	0.373134	0.0469152	657, 2249, 5320, 4853, 1387, 653882, 9241, 3815, 324, 3479	2278	25	13528	2.13788	1	0.25278	59.5434
GOTERM_BP_FAT	GO:0050772~positive regulation of axonogenesis	9	0.373134	0.0469152	81565, 387, 4803, 9138, 7074, 396, 4804, 5364, 4747	2278	25	13528	2.13788	1	0.25278	59.5434
GOTERM_BP_FAT	GO:0010948~negative regulation of cell cycle process	9	0.373134	0.0469152	651610, 7013, 699, 672, 472, 324, 5925, 1062, 4085, 9700	2278	25	13528	2.13788	1	0.25278	59.5434
GOTERM_BP_FAT	GO:0008544~epidermis development	41	1.69983	0.0486753	1290, 5970, 4851, 5664, 7476, 2071, 1029, 2252, 3861, 3909, 488, 2068, 2069, 8643, 5948, 1289, 10468, 538, 4804, 7251, 1281, 5154, 1308, 301, 5744, 5604, 91, 27032, 324, 3852, 5727, 207, 836, 3918, 8174, 182, 2255, 3914, 50509, 1277, 1278	2278	184	13528	1.32326	1	0.260811	60.9276
GOTERM_BP_FAT	GO:0006333~chromatin assembly or disassembly	30	1.24378	0.0487962	8338, 128312, 8339, 440577, 55869, 8467, 8340, 3013, 8360, 3012, 121504, 8362, 8361, 8346, 8364, 8345, 55355, 8363, 8348, 8366, 51773, 8347, 8365, 8368, 8342, 554313, 8341, 8970, 8367, 8344, 8343, 8349, 4869, 3018, 8370, 3014, 3015, 4171, 3017, 723790, 1058, 8337, 8294, 85236, 8335, 8334, 8290, 8359, 8331, 255626	2278	127	13528	1.40281	1	0.26108	61.021
GOTERM_BP_FAT	GO:0051222~positive regulation of protein transport	18	0.746269	0.0489479	135, 5950, 657, 5588, 2932, 5566, 3717, 7040, 3481, 5590, 6608, 387, 7424, 4088, 4089, 723961, 3630, 7046, 999, 5319	2278	67	13528	1.59543	1	0.261494	61.1379
GOTERM_BP_FAT	GO:0051298~centrosome duplication	5	0.207297	0.0495265	55835, 1069, 9662, 54820, 9738	2278	9	13528	3.29919	1	0.263903	61.5807
GOTERM_BP_FAT	GO:0010869~regulation of receptor biosynthetic process	5	0.207297	0.0495265	3685, 10013, 3065, 3066, 3690	2278	9	13528	3.29919	1	0.263903	61.5807
GOTERM_BP_FAT	GO:0051281~positive regulation of release of sequestered calcium ion into cytosol	5	0.207297	0.0495265	1909, 2147, 3973, 623, 1812	2278	9	13528	3.29919	1	0.263903	61.5807
GOTERM_BP_FAT	GO:0047496~vesicle transport along microtubule	5	0.207297	0.0495265	81565, 5590, 54820, 5604, 5048	2278	9	13528	3.29919	1	0.263903	61.5807
GOTERM_BP_FAT	GO:0050853~B cell receptor signaling pathway	5	0.207297	0.0495265	6850, 930, 9564, 4067, 5594	2278	9	13528	3.29919	1	0.263903	61.5807
GOTERM_BP_FAT	GO:0033158~regulation of protein import into nucleus, translocation	5	0.207297	0.0495265	657, 7040, 4089, 7046, 3717	2278	9	13528	3.29919	1	0.263903	61.5807
GOTERM_BP_FAT	GO:0017145~stem cell division	5	0.207297	0.0495265	89780, 653882, 4851, 1029, 5048, 3815	2278	9	13528	3.29919	1	0.263903	61.5807
GOTERM_BP_FAT	GO:0048385~regulation of retinoic acid receptor signaling pathway	5	0.207297	0.0495265	7050, 1592, 340665, 2099, 56603	2278	9	13528	3.29919	1	0.263903	61.5807
GOTERM_BP_FAT	GO:0034374~low-density lipoprotein particle remodeling	5	0.207297	0.0495265	338, 183, 5320, 185, 336	2278	9	13528	3.29919	1	0.263903	61.5807
GOTERM_BP_FAT	GO:0001963~synaptic transmission, dopaminergic	5	0.207297	0.0495265	135, 1020, 1812, 1814, 1816	2278	9	13528	3.29919	1	0.263903	61.5807
GOTERM_BP_FAT	GO:0030174~regulation of DNA replication initiation	5	0.207297	0.0495265	81620, 5884, 990, 5883, 8318	2278	9	13528	3.29919	1	0.263903	61.5807
GOTERM_BP_FAT	GO:0010717~regulation of epithelial to mesenchymal transition	5	0.207297	0.0495265	7040, 4088, 4089, 4092, 4087	2278	9	13528	3.29919	1	0.263903	61.5807
GOTERM_BP_FAT	GO:0042987~amyloid precursor protein catabolic process	5	0.207297	0.0495265	2280, 55851, 5664, 23385, 51107	2278	9	13528	3.29919	1	0.263903	61.5807
GOTERM_BP_FAT	GO:0014829~vascular smooth muscle contraction	5	0.207297	0.0495265	1909, 1908, 1910, 1906, 1907	2278	9	13528	3.29919	1	0.263903	61.5807
GOTERM_BP_FAT	GO:0050732~negative regulation of peptidyl-tyrosine phosphorylation	5	0.207297	0.0495265	5590, 5515, 5518, 8651, 5580	2278	9	13528	3.29919	1	0.263903	61.5807
GOTERM_BP_FAT	GO:0035019~somatic stem cell maintenance	5	0.207297	0.0495265	5320, 653882, 9241, 3815, 324, 3479	2278	9	13528	3.29919	1	0.263903	61.5807
GOTERM_BP_FAT	GO:0042108~positive regulation of cytokine biosynthetic process	14	0.580431	0.0498271	7189, 920, 2069, 941, 6850, 942, 5588, 940, 5970, 6777, 6776, 54106, 916, 336	2278	48	13528	1.73207	1	0.265005	61.809
GOTERM_BP_FAT	GO:0043029~T cell homeostasis	8	0.331675	0.0500619	7040, 9133, 6777, 6776, 10018, 5532, 207, 836	2278	21	13528	2.2623	1	0.265797	61.9863
GOTERM_BP_FAT	GO:0018210~peptidyl-threonine modification	8	0.331675	0.0500619	5599, 5578, 91, 5170, 7048, 7046, 156, 2475	2278	21	13528	2.2623	1	0.265797	61.9863
GOTERM_BP_FAT	GO:0046928~regulation of neurotransmitter secretion	8	0.331675	0.0500619	135, 1908, 3358, 3060, 2918, 815, 4803, 4915	2278	21	13528	2.2623	1	0.265797	61.9863
GOTERM_BP_FAT	GO:0046889~positive regulation of lipid biosynthetic process	8	0.331675	0.0500619	3481, 183, 5321, 5562, 723961, 3630, 344, 552, 207, 551	2278	21	13528	2.2623	1	0.265797	61.9863
GOTERM_BP_FAT	GO:0048589~developmental growth	22	0.912106	0.0508362	658, 4854, 4853, 5588, 2309, 4851, 9837, 5664, 3479, 1081, 207, 5054, 2243, 351, 5340, 2069, 81565, 6608, 2255, 7840, 891, 898	2278	87	13528	1.5017	1	0.269085	62.5656
GOTERM_BP_FAT	GO:0001889~liver development	15	0.621891	0.0518336	595, 2064, 3673, 3280, 2033, 5970, 4851, 6777, 7450, 894, 1543, 8841, 6667, 898, 1499	2278	53	13528	1.68072	1	0.27338	63.2996
GOTERM_BP_FAT	GO:0018904~organic ether metabolic process	15	0.621891	0.0518336	137964, 338, 4023, 5781, 344, 336, 345, 57678, 348, 7840, 8527, 1543, 84803, 139189, 1544	2278	53	13528	1.68072	1	0.27338	63.2996
GOTERM_BP_FAT	GO:0006979~response to oxidative stress	37	1.534	0.0521847	2110, 6772, 1956, 5578, 2033, 5970, 2071, 4541, 4700, 156, 2068, 6352, 1583, 5516, 7351, 7352, 10013, 538, 2066, 2067, 4728, 5321, 5604, 3091, 5693, 4720, 2775, 4710, 5054, 7507, 348, 3717, 55967, 2549, 1277, 6382, 139189	2278	164	13528	1.33979	1	0.274684	63.5546
GOTERM_BP_FAT	GO:0042102~positive regulation of T cell proliferation	12	0.497512	0.0523633	7412, 941, 6850, 5588, 940, 80380, 6777, 8767, 8440, 6776, 916, 4690	2278	39	13528	1.82724	1	0.275195	63.6838
GOTERM_BP_FAT	GO:0006278~RNA-dependent DNA replication	7	0.290216	0.0524283	7014, 7015, 7013, 25913, 5981, 1736, 54386	2278	17	13528	2.44528	1	0.275184	63.7306
GOTERM_BP_FAT	GO:0051225~spindle assembly	7	0.290216	0.0524283	81027, 9611, 80254, 203068, 8841, 26271, 55142, 647000	2278	17	13528	2.44528	1	0.275184	63.7306
GOTERM_BP_FAT	GO:0060393~regulation of pathway-restricted SMAD protein phosphorylation	7	0.290216	0.0524283	657, 7040, 4089, 650, 7046, 4092, 4091	2278	17	13528	2.44528	1	0.275184	63.7306
GOTERM_BP_FAT	GO:0018205~peptidyl-lysine modification	7	0.290216	0.0524283	8850, 1387, 2033, 10013, 9734, 9759, 538	2278	17	13528	2.44528	1	0.275184	63.7306
GOTERM_BP_FAT	GO:0032107~regulation of response to nutrient levels	6	0.248756	0.0529972	51738, 1594, 4852, 885, 2693, 2475	2278	13	13528	2.74087	1	0.277471	64.1386
GOTERM_BP_FAT	GO:0032104~regulation of response to extracellular stimulus	6	0.248756	0.0529972	51738, 1594, 4852, 885, 2693, 2475	2278	13	13528	2.74087	1	0.277471	64.1386
GOTERM_BP_FAT	GO:0030511~positive regulation of transforming growth factor beta receptor signaling pathway	6	0.248756	0.0529972	1030, 6868, 8516, 4221, 5045, 7057	2278	13	13528	2.74087	1	0.277471	64.1386
GOTERM_BP_FAT	GO:0032770~positive regulation of monooxygenase activity	6	0.248756	0.0529972	3481, 186, 3091, 3845, 723961, 3630, 207, 348	2278	13	13528	2.74087	1	0.277471	64.1386
GOTERM_BP_FAT	GO:0034612~response to tumor necrosis factor	6	0.248756	0.0529972	1594, 6352, 58191, 3643, 102, 836	2278	13	13528	2.74087	1	0.277471	64.1386
GOTERM_BP_FAT	GO:0007076~mitotic chromosome condensation	6	0.248756	0.0529972	64151, 23397, 113130, 10592, 9918, 10051	2278	13	13528	2.74087	1	0.277471	64.1386
GOTERM_BP_FAT	GO:0031109~microtubule polymerization or depolymerization	6	0.248756	0.0529972	55835, 11004, 84643, 81930, 7472, 26271	2278	13	13528	2.74087	1	0.277471	64.1386
GOTERM_BP_FAT	GO:0008645~hexose transport	10	0.414594	0.0531692	1909, 3481, 2688, 5473, 7525, 1812, 723961, 3630, 53632, 207, 1906, 5319	2278	30	13528	1.97951	1	0.277944	64.261
GOTERM_BP_FAT	GO:0060606~tube closure	10	0.414594	0.0531692	7189, 7050, 1856, 8323, 7248, 7249, 7976, 2909, 5727, 10395	2278	30	13528	1.97951	1	0.277944	64.261
GOTERM_BP_FAT	GO:0001843~neural tube closure	10	0.414594	0.0531692	7189, 7050, 1856, 8323, 7248, 7249, 7976, 2909, 5727, 10395	2278	30	13528	1.97951	1	0.277944	64.261
GOTERM_BP_FAT	GO:0045768~positive regulation of anti-apoptosis	10	0.414594	0.0531692	2066, 133, 940, 4035, 5562, 4889, 1026, 4086, 4092, 5921	2278	30	13528	1.97951	1	0.277944	64.261
GOTERM_BP_FAT	GO:0007588~excretion	16	0.66335	0.0533851	134, 135, 136, 5733, 3827, 50617, 1906, 6344, 6869, 183, 6865, 23327, 1813, 554, 525, 551	2278	58	13528	1.63822	1	0.278615	64.4142
GOTERM_BP_FAT	GO:0050865~regulation of cell activation	39	1.61692	0.0543275	135, 920, 941, 942, 136, 940, 29126, 8767, 80380, 1029, 1026, 51083, 3624, 7189, 6869, 7040, 6850, 8440, 572, 7048, 2064, 8399, 5154, 5155, 5588, 916, 836, 348, 3717, 55824, 7412, 6863, 6777, 6776, 6778, 83737, 3932, 7057, 4690	2278	175	13528	1.32345	1	0.282566	65.0754
GOTERM_BP_FAT	GO:0000904~cell morphogenesis involved in differentiation	52	2.15589	0.0546249	4855, 5781, 3280, 5578, 9241, 4851, 2335, 3480, 7852, 885, 886, 5747, 2064, 89780, 8399, 2065, 3091, 6507, 1385, 4747, 3717, 7311, 56896, 10371, 8828, 8829, 3915, 728590, 1813, 3912, 5879, 55558, 6285, 8650, 5048, 1499, 667, 81565, 7040, 4983, 4804, 8997, 65078, 8851, 658, 324, 650, 6233, 351, 491, 1020, 6387, 56288	2278	244	13528	1.26559	1	0.283593	65.2817
GOTERM_BP_FAT	GO:0035148~tube lumen formation	13	0.538972	0.0554124	7189, 7050, 1856, 8323, 7248, 54361, 7249, 57534, 7976, 2909, 10018, 5727, 10395	2278	44	13528	1.75457	1	0.286813	65.8223
GOTERM_BP_FAT	GO:0006720~isoprenoid metabolic process	13	0.538972	0.0554124	5950, 6121, 6017, 145226, 9227, 51109, 9249, 1592, 340665, 5948, 5947, 1543, 56603	2278	44	13528	1.75457	1	0.286813	65.8223
GOTERM_BP_FAT	GO:0045216~cell-cell junction organization	11	0.456053	0.057982	154796, 50855, 7040, 4088, 7094, 8650, 324, 5584, 7082, 998, 4092	2278	35	13528	1.8664	1	0.297915	67.5315
GOTERM_BP_FAT	GO:0048864~stem cell development	9	0.373134	0.058118	657, 2249, 5320, 4853, 1387, 653882, 9241, 3815, 324, 3479	2278	26	13528	2.05565	1	0.29819	67.6197
GOTERM_BP_FAT	GO:0000737~DNA catabolic process, endonucleolytic	9	0.373134	0.058118	2068, 2067, 54205, 2072, 1029, 2071, 2073, 836, 4609	2278	26	13528	2.05565	1	0.29819	67.6197
GOTERM_BP_FAT	GO:0022898~regulation of transmembrane transporter activity	9	0.373134	0.058118	135, 2771, 2280, 3481, 805, 801, 808, 1813, 723961, 3630, 1814, 336, 154	2278	26	13528	2.05565	1	0.29819	67.6197
GOTERM_BP_FAT	GO:0046677~response to antibiotic	9	0.373134	0.058118	1233, 5516, 5578, 5347, 6507, 6347, 1543, 7386, 3717	2278	26	13528	2.05565	1	0.29819	67.6197
GOTERM_BP_FAT	GO:0045766~positive regulation of angiogenesis	9	0.373134	0.058118	51564, 154796, 2837, 388, 2247, 3091, 9734, 8877, 7057	2278	26	13528	2.05565	1	0.29819	67.6197
GOTERM_BP_FAT	GO:0010038~response to metal ion	30	1.24378	0.0581186	338, 4331, 805, 5599, 682, 1956, 2033, 801, 2266, 3861, 4734, 846, 1499, 513, 7252, 1583, 2244, 538, 23327, 1543, 728294, 595, 2395, 5728, 5321, 3710, 2243, 540, 808, 6382, 3643, 7057	2278	129	13528	1.38106	1	0.297869	67.6201
GOTERM_BP_FAT	GO:0007423~sensory organ development	49	2.03151	0.0582746	388585, 5950, 10818, 1290, 6774, 3280, 9241, 2254, 60436, 8323, 80184, 1289, 5584, 1280, 3714, 2064, 89780, 2065, 2904, 7976, 1906, 28514, 2255, 7840, 2909, 4609, 26281, 7471, 8516, 1956, 1027, 1499, 7040, 2792, 7422, 1543, 10018, 5154, 658, 10253, 5156, 324, 2779, 6667, 491, 7050, 2780, 182, 4915	2278	229	13528	1.27069	1	0.298231	67.7209
GOTERM_BP_FAT	GO:0045935~positive regulation of nucleobase, nucleoside, nucleotide and nucleic acid metabolic process	121	5.01658	0.0584119	4208, 4303, 6774, 941, 942, 2149, 2002, 3280, 8928, 3479, 3726, 154, 3480, 3481, 1387, 8878, 51773, 5741, 375790, 5744, 672, 79718, 3091, 1901, 1385, 122042, 3718, 348, 728590, 4221, 6777, 1812, 6776, 1814, 6778, 4790, 1816, 4792, 4609, 1432, 5970, 56034, 2071, 10014, 2068, 2069, 7040, 7422, 4090, 7046, 4093, 10413, 5154, 5155, 890, 5156, 2308, 2309, 9759, 26277, 3014, 6667, 2965, 23433, 55534, 2…	2278	624	13528	1.15154	1	0.298511	67.8094
GOTERM_BP_FAT	GO:0008344~adult locomotory behavior	15	0.621891	0.0595529	2902, 2912, 2395, 2906, 5048, 478, 477, 351, 7253, 4985, 4803, 1812, 1813, 7200, 4923	2278	54	13528	1.6496	1	0.303176	68.5362
GOTERM_BP_FAT	GO:0030198~extracellular matrix organization	25	1.03648	0.0615369	1292, 1280, 1281, 5747, 1290, 8516, 4318, 5156, 1284, 2683, 3339, 3381, 351, 2068, 7448, 2280, 59350, 183, 3915, 50509, 1277, 1289, 538, 1278, 7046	2278	104	13528	1.42753	1	0.311447	69.763
GOTERM_BP_FAT	GO:0021953~central nervous system neuron differentiation	12	0.497512	0.0616605	1020, 81565, 5747, 6608, 5578, 1812, 84894, 2776, 5048, 1813, 538, 55558	2278	40	13528	1.78156	1	0.311646	69.8379
GOTERM_BP_FAT	GO:0034504~protein localization in nucleus	23	0.953566	0.0624547	2147, 23649, 2149, 7514, 2254, 7249, 5617, 51079, 5532, 207, 7157, 9372, 5530, 3717, 5903, 4928, 9702, 7040, 2255, 2247, 1812, 4792, 5594	2278	94	13528	1.45305	1	0.314722	70.3151
GOTERM_BP_FAT	GO:0019059~initiation of viral infection	8	0.331675	0.0631278	8815, 920, 1234, 653214, 645870, 11059, 7852, 83737, 5478, 3383	2278	22	13528	2.15947	1	0.317263	70.7139
GOTERM_BP_FAT	GO:0009395~phospholipid catabolic process	8	0.331675	0.0631278	222236, 283748, 5335, 5321, 5331, 5337, 1812, 336	2278	22	13528	2.15947	1	0.317263	70.7139
GOTERM_BP_FAT	GO:0021766~hippocampus development	8	0.331675	0.0631278	1020, 89780, 7248, 440917, 7804, 1812, 5048, 7531, 55558	2278	22	13528	2.15947	1	0.317263	70.7139
GOTERM_BP_FAT	GO:0048538~thymus development	8	0.331675	0.0631278	2248, 1399, 9133, 5664, 324, 10018, 7046, 1499	2278	22	13528	2.15947	1	0.317263	70.7139
GOTERM_BP_FAT	GO:0048286~lung alveolus development	8	0.331675	0.0631278	659, 5154, 7422, 2255, 5744, 5664, 3791, 538	2278	22	13528	2.15947	1	0.317263	70.7139
GOTERM_BP_FAT	GO:0046824~positive regulation of nucleocytoplasmic transport	8	0.331675	0.0631278	6608, 387, 5588, 4088, 2932, 5566, 4734, 999	2278	22	13528	2.15947	1	0.317263	70.7139
GOTERM_BP_FAT	GO:0007171~activation of transmembrane receptor protein tyrosine kinase activity	4	0.165837	0.0638471	5618, 3084, 56034, 154	2278	6	13528	3.95903	1	0.319987	71.1345
GOTERM_BP_FAT	GO:0060390~regulation of SMAD protein nuclear translocation	4	0.165837	0.0638471	657, 7040, 4089, 7046	2278	6	13528	3.95903	1	0.319987	71.1345
GOTERM_BP_FAT	GO:0034384~high-density lipoprotein particle clearance	4	0.165837	0.0638471	344, 336, 335, 348	2278	6	13528	3.95903	1	0.319987	71.1345
GOTERM_BP_FAT	GO:0048664~neuron fate determination	4	0.165837	0.0638471	388585, 7471, 3280, 998	2278	6	13528	3.95903	1	0.319987	71.1345
GOTERM_BP_FAT	GO:0042538~hyperosmotic salinity response	4	0.165837	0.0638471	5020, 6870, 553, 551	2278	6	13528	3.95903	1	0.319987	71.1345
GOTERM_BP_FAT	GO:0030432~peristalsis	4	0.165837	0.0638471	6752, 183, 1812, 1813	2278	6	13528	3.95903	1	0.319987	71.1345
GOTERM_BP_FAT	GO:0014911~positive regulation of smooth muscle cell migration	4	0.165837	0.0638471	3673, 6198, 5155, 3479	2278	6	13528	3.95903	1	0.319987	71.1345
GOTERM_BP_FAT	GO:0007099~centriole replication	4	0.165837	0.0638471	55835, 1069, 9662, 9738	2278	6	13528	3.95903	1	0.319987	71.1345
GOTERM_BP_FAT	GO:0006857~oligopeptide transport	4	0.165837	0.0638471	121260, 6565, 51296, 6564	2278	6	13528	3.95903	1	0.319987	71.1345
GOTERM_BP_FAT	GO:0045922~negative regulation of fatty acid metabolic process	4	0.165837	0.0638471	3481, 672, 723961, 3630, 345, 207	2278	6	13528	3.95903	1	0.319987	71.1345
GOTERM_BP_FAT	GO:0042159~lipoprotein catabolic process	4	0.165837	0.0638471	3949, 338, 651610, 472, 348	2278	6	13528	3.95903	1	0.319987	71.1345
GOTERM_BP_FAT	GO:0006085~acetyl-CoA biosynthetic process	4	0.165837	0.0638471	1743, 5162, 1738, 1737	2278	6	13528	3.95903	1	0.319987	71.1345
[truncated: 186 more rows]

## Sheet: GO_CC
Category	Term	Count	%	PValue	Genes	List Total	Pop Hits	Pop Total	Fold Enrichment	Bonferroni	Benjamini	FDR
[truncated: 213 more rows]

## Sheet: GO_MF
Category	Term	Count	%	PValue	Genes	List Total	Pop Hits	Pop Total	Fold Enrichment	Bonferroni	Benjamini	FDR
[truncated: 333 more rows]
