# Supplementary material for: Pathway-Wide Genetic Risks in Chlamydial Infections Overlap between Tissue Tropisms: A Genome-Wide Association Scan
Source: Mediators Inflamm. 2018 Jun 3;2018:3434101. doi: 10.1155/2018/3434101 (PMC6008910; doi:10.1155/2018/3434101)
Supplement: Supplementary 2 — Supplementary Figure 1: results of GWAS analysis using EMMAX|QQ plot. Supplementary Table 1: complete list of SNPs with pEMMAX < 1 × 10–6. Supplementary Table 2: permuted p values for Reactome pathways with significant enrichment in chlamydial seropositivity: ALIGATOR analysis. [file 3434101.f2.docx]

**Supplementary Materials**

**Pathways-wide genetic risks in Chlamydial infections overlap between tissue tropisms : A genome-wide association scan.**

Chrissy h. Roberts1#*, Sander Ouberg2#, Mark Preston3, Martin J Holland1, Servaas Morre2

1. London School of Hygiene and Tropical Medicine, London, UK

2. Institute for Public Health Genomics, Maastricht University, The Netherlands

3. National Institute for Biological Standards and Controls, Potters Bar, UK

# : These authors contributed equally to the work

* Corresponding author.

Mailing address :

Clinical Research Department, London School of Hygiene and Tropical Medicine, Keppel St. London, UK WC1E 7HT

Phone : +44 (0) 20 7927 2913

E-mail : chrissy.roberts@lshtm.ac.uk


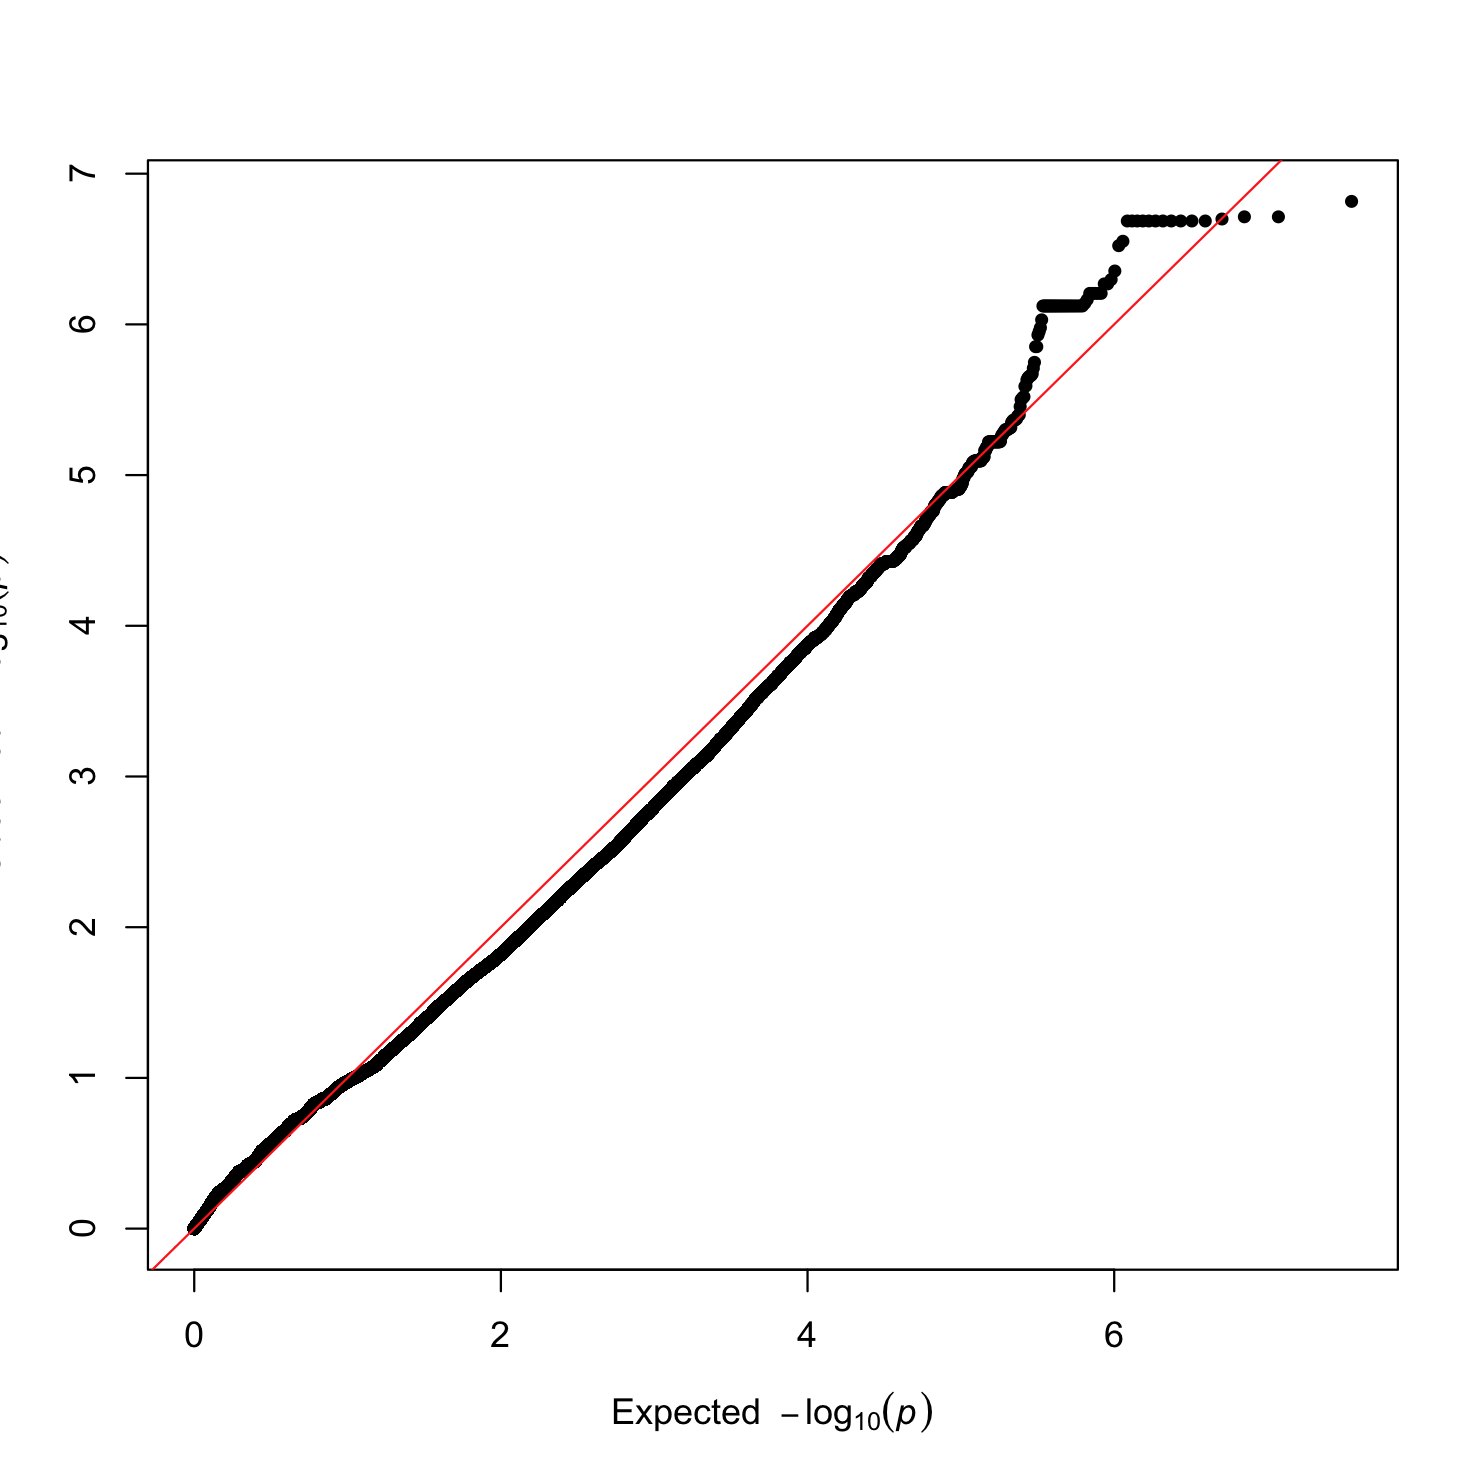


**Supplementary Figure 1: Results of GWAS Analysis using EMMAX | QQ plot**: There is negligible genome-wide inflation (λ = 1.02) of the test statistic when the phenotype is corrected for kinship using EMMAX.

**TABLES**

**Supplementary Table 1 : Complete list of SNPs with PEMMAX < 1 x 10-6**

| SNP | CHR | BP | Allele1/2  (Effect allele bold) | | FREQ EA | Type | P | OR | Gene |
| --- | --- | --- | --- | --- | --- | --- | --- | --- | --- |
| rs6821248 | 4 | 104158360 | G | **A** | 0.253 | IMPUTED | 8.76E-07 | 0.79 | - |
| rs140848189 | 7 | 34560375 | G | **A** | 0.047 | 0 | 1.93E-07 | 0.59 | NPSR1/NPSR1-AS1 |
| rs76846649 | 7 | 34563394 | C | **T** | 0.047 | 0 | 2.06E-07 | 0.59 | NPSR1/NPSR1-AS1 |
| rs77039854 | 7 | 34568481 | T | **C** | 0.047 | 0 | 2.06E-07 | 0.59 | NPSR1/NPSR1-AS1 |
| rs80117932 | 7 | 34578732 | C | **T** | 0.047 | 0 | 2.06E-07 | 0.59 | NPSR1/NPSR1-AS1 |
| rs150504988 | 7 | 34579413 | C | **T** | 0.047 | 0 | 2.06E-07 | 0.59 | NPSR1/NPSR1-AS1 |
| rs144301570 | 7 | 34579601 | C | **T** | 0.047 | 0 | 2.06E-07 | 0.59 | NPSR1/NPSR1-AS1 |
| rs720756 | 7 | 34586240 | T | **C** | 0.047 | 0 | 2.06E-07 | 0.59 | NPSR1/NPSR1-AS1 |
| rs117759681 | 7 | 34587384 | A | **G** | 0.047 | 0 | 2.06E-07 | 0.59 | NPSR1/NPSR1-AS1 |
| rs117248409 | 7 | 34592104 | G | **C** | 0.047 | 0 | 2.06E-07 | 0.59 | NPSR1/NPSR1-AS1 |
| rs149816411 | 7 | 34603206 | G | **T** | 0.046 | 0 | 2.06E-07 | 0.59 | NPSR1/NPSR1-AS1 |
| rs117769079 | 7 | 34604834 | G | **A** | 0.046 | 0 | 2.06E-07 | 0.59 | NPSR1/NPSR1-AS1 |
| rs150769419 | 7 | 34616557 | C | **T** | 0.046 | 0 | 7.55E-07 | 0.61 | NPSR1/NPSR1-AS1 |
| rs143522867 | 7 | 34619964 | T | **C** | 0.047 | 0 | 6.86E-07 | 0.61 | NPSR1/NPSR1-AS1 |
| rs149492529 | 7 | 34622072 | C | **T** | 0.046 | 0 | 7.55E-07 | 0.61 | NPSR1/NPSR1-AS1 |
| rs78892190 | 7 | 34624324 | C | **T** | 0.05 | 0 | 1.53E-07 | 0.60 | NPSR1/NPSR1-AS1 |
| rs147718876 | 7 | 34624550 | A | **C** | 0.046 | 0 | 7.55E-07 | 0.61 | NPSR1/NPSR1-AS1 |
| rs10486647 | 7 | 34625366 | G | **A** | 0.046 | 0 | 7.55E-07 | 0.61 | NPSR1/NPSR1-AS1 |
| rs10486648 | 7 | 34626638 | G | **T** | 0.046 | 0 | 7.55E-07 | 0.61 | NPSR1/NPSR1-AS1 |
| rs117769298 | 7 | 34628434 | C | **T** | 0.046 | 0 | 7.55E-07 | 0.61 | NPSR1/NPSR1-AS1 |
| rs17185518 | 7 | 34629366 | C | **T** | 0.046 | 0 | 7.55E-07 | 0.61 | NPSR1/NPSR1-AS1 |
| rs144762542 | 7 | 34632200 | C | **T** | 0.046 | 0 | 7.55E-07 | 0.61 | NPSR1/NPSR1-AS1 |
| rs146348877 | 7 | 34634739 | T | **G** | 0.046 | 0 | 7.55E-07 | 0.61 | NPSR1/NPSR1-AS1 |
| rs149606913 | 7 | 34635012 | T | **C** | 0.046 | 0 | 7.55E-07 | 0.61 | NPSR1/NPSR1-AS1 |
| SNP | CHR | BP | Allele1/2  (Effect allele bold) | | FREQ EA | Type | P | OR | Gene |
| rs17766476 | 7 | 34635829 | A | **G** | 0.046 | 0 | 7.55E-07 | 0.61 | NPSR1/NPSR1-AS1 |
| rs143994032 | 7 | 34637735 | G | A | 0.046 | 0 | 7.55E-07 | 0.61 | NPSR1/NPSR1-AS1 |
| rs118100793 | 7 | 34638789 | C | T | 0.047 | 0 | 7.55E-07 | 0.61 | NPSR1/NPSR1-AS1 |
| rs17766746 | 7 | 34645369 | A | G | 0.046 | 0 | 7.55E-07 | 0.61 | NPSR1/NPSR1-AS1 |
| rs17186189 | 7 | 34648291 | T | C | 0.046 | 0 | 7.55E-07 | 0.61 | NPSR1/NPSR1-AS1 |
| rs10259060 | 7 | 34656439 | T | C | 0.046 | 0 | 7.55E-07 | 0.61 | NPSR1/NPSR1-AS1 |
| rs10257538 | 7 | 34661232 | T | G | 0.044 | 0 | 2.00E-07 | 0.59 | NPSR1/NPSR1-AS1 |
| rs10270133 | 7 | 34664232 | T | C | 0.046 | 0 | 7.55E-07 | 0.61 | NPSR1/NPSR1-AS1 |
| rs28615557 | 7 | 34666825 | T | C | 0.046 | 0 | 7.55E-07 | 0.61 | NPSR1/NPSR1-AS1 |
| rs10244727 | 7 | 34666861 | G | T | 0.046 | 0 | 7.55E-07 | 0.61 | NPSR1/NPSR1-AS1 |
| rs2169679 | 10 | 53873323 | C | T | 0.326 | 0 | 9.33E-07 | 0.81 | PRKG1 |
| rs10762570 | 10 | 53878170 | C | T | 0.324 | 0 | 5.04E-07 | 0.80 | PRKG1 |
| rs12259288 | 10 | 53889255 | A | G | 0.333 | 0 | 2.81E-07 | 0.8 | PRKG1 |
| rs4082299 | 10 | 53896068 | T | C | 0.322 | 0 | 5.39E-07 | 0.81 | PRKG1 |
| rs12413303 | 10 | 53896150 | G | A | 0.322 | 2 | 6.23E-07 | 0.81 | PRKG1 |
| rs10824089 | 10 | 53896170 | G | C | 0.322 | 0 | 6.23E-07 | 0.81 | PRKG1 |
| rs4935310 | 10 | 53896500 | A | G | 0.322 | 0 | 3.01E-07 | 0.80 | PRKG1 |
| rs4935032 | 10 | 53896713 | T | C | 0.322 | 0 | 6.23E-07 | 0.81 | PRKG1 |
| rs4935311 | 10 | 53896741 | G | T | 0.322 | 0 | 6.23E-07 | 0.81 | PRKG1 |
| rs10762578 | 10 | 53897291 | C | G | 0.323 | 0 | 7.25E-07 | 0.81 | PRKG1 |
| rs10762580 | 10 | 53897482 | C | T | 0.322 | 0 | 6.23E-07 | 0.81 | PRKG1 |
| rs3886884 | 10 | 53898181 | A | G | 0.322 | 0 | 5.39E-07 | 0.81 | PRKG1 |
| rs77175455 | 16 | 29615810 | **A** | T | 0.62 | IMPUTED | 7.43E-07 | 0.75 | *-* |
| rs79741827 | 16 | 56733116 | T | C | 0.044 | 0 | 4.42E-07 | 0.59 | - |

**Supplementary Table 2 : Permuted P values for Reactome pathways with significant enrichment in Chlamydial seropositivity: ALIGATOR analysis.**

|  | Cutoff threshold | P = 0.01 | | P = 0.001 | P = 0.0001 |
| --- | --- | --- | --- | --- | --- |
| Pathway Name |  | P values for tests | | | |
| GPCR downstream signaling | | | 0.00009 | 0.349 | 0.5294 |
| Olfactory Signaling Pathway | | 0.00009 | | 0.2862 | 0.6036 |
| Signaling by GPCR | | 0.0006 | | 0.2604 | 0.3868 |
| Signal Transduction | | 0.0014 | | 0.2554 | 0.2146 |
| G1 S Transition | | 0.0052 | | 0.8932 | 0.2158 |
| CREB phosphorylation through the activation of CaMKII | | 0.007 | | 1 | 1 |
| Mitotic G1 G1 S phases | | 0.0168 | | 0.7666 | 0.0382 |
| CRMPs in Sema3A signaling | | 0.0206 | | 0.2692 | 1 |
| The citric acid TCA cycle and respiratory electron transport | | 0.0334 | | 0.0036 | 1 |
| P2Y receptors | | 0.0352 | | 1 | 1 |
| Regulation of DNA replication | | 0.039 | | 1 | 1 |
| Removal of licensing factors from origins | | 0.039 | | 1 | 1 |
| Sphingolipid de novo biosynthesis | | 0.0394 | | 0.8668 | 0.211 |
| Cyclin E associated events during G1 S transition | | 0.0428 | | 0.7174 | 0.134 |
| p53 Dependent G1 DNA Damage Response | | 0.0478 | | 0.6754 | 0.1164 |
| p53 Dependent G1 S DNA damage checkpoint | | 0.0478 | | 0.6754 | 0.1164 |
| G alpha i signalling events | | 0.0484 | | 0.0342 | 1 |
| Cyclin A B1 associated events during G2 M transition | | 0.0616 | | 0.3126 | 0.0408 |
| Retinoid cycle disease events | | 0.0792 | | 0.1332 | 0.0166 |
| Respiratory electron transport, ATP synthesis by chemiosmotic coupling, and heat production by uncoupling proteins. | | 0.0882 | | 0.0054 | 1 |
| Proton oligonucleotide cotransporters | | 0.093 | | 0.0122 | 1 |
| Eicosanoids | | 0.105 | | 0.0618 | 0.0448 |
| AKT phosphorylates targets in the cytosol | | 0.16 | | 0.0372 | 0.032 |
| Chemokine receptors bind chemokines | | 0.1936 | | 0.0432 | 1 |
| Constitutive PI3K AKT Signaling in Cancer | | 0.1954 | | 0.076 | 0.0336 |
| Respiratory electron transport | | 0.2006 | | 0.0388 | 1 |
| Synthesis of PA | | 0.2034 | | 0.0498 | 1 |
| FGFR2b ligand binding and activation | | 0.2356 | | 0.0248 | 0.0366 |
| Mitochondrial Iron Sulfur Cluster Biogenesis | | 0.2366 | | 0.1944 | 0.0262 |
| RNA Polymerase I Promoter Opening | | 0.3196 | | 0.0412 | 1 |
| Citric acid cycle TCA cycle | | 0.3198 | | 0.0476 | 1 |
| FGFR2c ligand binding and activation | | 0.3362 | | 0.264 | 0.0364 |
| Growth hormone receptor signaling | | 0.3568 | | 0.0204 | 1 |
| Binding and entry of HIV virion | | 0.3934 | | 0.0468 | 1 |
| The canonical retinoid cycle in rods twilight vision | | 0.405 | | 0.2652 | 0.028 |
| Insulin effects increased synthesis of Xylulose 5 Phosphate | | 0.4224 | | 0.0392 | 1 |
| Ion transport by P type ATPases | | 0.4334 | | 0.257 | 0.0382 |
| PI3K AKT activation | | 0.4702 | | 0.1434 | 0.0486 |
| PI 3K cascade | | 0.4702 | | 0.1434 | 0.0486 |
| PI3K events in ERBB2 signaling | | 0.4702 | | 0.1434 | 0.0486 |
| PI3K events in ERBB4 signaling | | 0.4702 | | 0.1434 | 0.0486 |
| PI3K AKT Signaling in Cancer | | 0.4702 | | 0.1434 | 0.0486 |
| PIP3 activates AKT signaling | | 0.4702 | | 0.1434 | 0.0486 |
| Rho GTPase cycle | | 0.4972 | | 0.4676 | 0.029 |
| Signaling by Rho GTPases | | 0.4972 | | 0.4676 | 0.029 |
| Endosomal Sorting Complex Required For Transport ESCRT | | 0.505 | | 0.0254 | 1 |
| RNA Polymerase I Chain Elongation | | 0.5396 | | 0.0604 | 0.0384 |
| RNA Polymerase I Transcription Initiation | | 0.5852 | | 0.0702 | 0.0414 |
| RNA Polymerase I Promoter Escape | | 0.5852 | | 0.0702 | 0.0414 |
| PD 1 signaling | | 0.592 | | 0.034 | 1 |
| Cell Cycle | | 0.603 | | 0.4332 | 0.038 |
| RNA Polymerase I Promoter Clearance | | 0.6164 | | 0.0756 | 0.0428 |
| RNA Polymerase I Transcription Termination | | 0.6256 | | 0.0748 | 0.0422 |
| Dual incision reaction in GG NER | | 0.6366 | | 0.3946 | 0.0438 |
| Formation of incision complex in GG NER | | 0.6366 | | 0.3946 | 0.0438 |
| Signaling by VEGF | | 0.6518 | | 0.0344 | 1 |
| VEGF ligand receptor interactions | | 0.6518 | | 0.0344 | 1 |
| Signaling by FGFR2 amplification mutants | | 0.653 | | 0.1074 | 0.0144 |
| Cytochrome P450 arranged by substrate type | | 0.6536 | | 0.0412 | 0.1708 |
| RNA Polymerase I Transcription | | 0.6904 | | 0.0904 | 0.0466 |
| Free fatty acid receptors | | 0.7174 | | 0.1326 | 0.0164 |
| Mitochondrial tRNA aminoacylation | | 0.7246 | | 0.0452 | 1 |
| Type I hemidesmosome assembly | | 0.742 | | 0.2836 | 0.0348 |
| Tandem pore domain halothane inhibited K+ channel THIK | | 0.8106 | | 0.139 | 0.0214 |
| Neurotransmitter uptake and Metabolism In Glial Cells | | 0.843 | | 0.2284 | 0.0242 |
| Astrocytic Glutamate Glutamine Uptake And Metabolism | | 0.843 | | 0.2284 | 0.0242 |
